# Supplementary material for: NF-κB inhibitors, unique γ-pyranol-γ-lactams with sulfide and sulfoxide moieties from Hawaiian plant Lycopodiella cernua derived fungus Paraphaeosphaeria neglecta FT462
Source: PubMed Central journal article supplement (PMC5585240; doi:10.1038/s41598-017-10537-1), 2017-09-05
Supplement: 41598_2017_10537_MOESM1_ESM.pdf [file 41598_2017_10537_MOESM1_ESM.pdf]

## Supporting Information

# NF- $\kappa$ B inhibitors, unique $\gamma$ -pyranol- $\gamma$ -lactams with sulfide and sulfoxide moieties from Hawaiian plant *Lycopodiella cernua* derived fungus *Paraphaeosphaeria neglecta* FT462

Chun-Shun Li<sup>1,2</sup>, Ariel M. Sarotti<sup>3</sup>, Peng Huang<sup>1,4</sup>, Uyen T. Dang<sup>5</sup>, Julian Hurdle<sup>5</sup>,  
Tamara P. Kondratyuk<sup>1</sup>, John M. Pezzuto<sup>1,6</sup>, James Turkson<sup>2</sup>, & Shugeng Cao<sup>\*1,2</sup>

<sup>1</sup>Department of Pharmaceutical Sciences, Daniel K. Inouye College of Pharmacy, University of Hawai'i at Hilo, 200 W. Kawili Street, Hilo, HI 96720, USA.

<sup>2</sup>Cancer Biology Program, Cancer Center, University of Hawaii, 701 Ilalo Street, Honolulu, Hawai'i 96813, USA.

<sup>3</sup>Instituto de Química Rosario (CONICET), Facultad de Ciencias Bioquímicas y Farmacéuticas, Universidad Nacional de Rosario, Suipacha 531, Rosario 2000, Argentina.

<sup>4</sup>College of Pharmacy, Anhui University of Chinese Medicine, 45 Shihe Road, Hefei 230031, China.

<sup>5</sup>Center for Infectious and Inflammatory Diseases, Texas A&M Health Science Center, 2121 West Holcombe Blvd., Houston, TX 77030, USA.

<sup>6</sup>Schwartz College of Pharmacy and Health Sciences, Long Island University, 75 DeKalb Avenue, Brooklyn, NY 11201-5497. Correspondence and requests for materials should be addressed to S. C. (email: scao@hawaii.edu)

## Content

|                       |                                                                                                                                                                                             |                |
|-----------------------|---------------------------------------------------------------------------------------------------------------------------------------------------------------------------------------------|----------------|
| <b>Figure S1</b>      | <sup>1</sup> H NMR spectrum (500 MHz, methanol- <i>d</i> <sub>4</sub> ) of compound <b>1</b> .....                                                                                          | <b>S4</b>      |
| <b>Figure S2</b>      | <sup>13</sup> C NMR spectrum of compound <b>1</b> .....                                                                                                                                     | <b>S5</b>      |
| <b>Figure S3</b>      | <sup>1</sup> H- <sup>1</sup> H COSY of compound <b>1</b> .....                                                                                                                              | <b>S6</b>      |
| <b>Figure S4</b>      | HSQC spectrum of compound <b>1</b> .....                                                                                                                                                    | <b>S7</b>      |
| <b>Figure S5</b>      | HMBC spectrum of compound <b>1</b> .....                                                                                                                                                    | <b>S8</b>      |
| <b>Figure S6</b>      | <sup>1</sup> H NMR spectrum (500 MHz, methanol- <i>d</i> <sub>4</sub> ) of compound <b>2</b> .....                                                                                          | <b>S9</b>      |
| <b>Figure S7</b>      | <sup>13</sup> C NMR spectrum of compound <b>2</b> .....                                                                                                                                     | <b>S10</b>     |
| <b>Figure S8</b>      | <sup>1</sup> H- <sup>1</sup> H COSY of compound <b>2</b> .....                                                                                                                              | <b>S11</b>     |
| <b>Figure S9</b>      | HSQC spectrum of compound <b>2</b> .....                                                                                                                                                    | <b>S12</b>     |
| <b>Figure S10</b>     | HMBC spectrum of compound <b>2</b> .....                                                                                                                                                    | <b>S13</b>     |
| <b>Figure S11</b>     | <sup>1</sup> H NMR spectrum (400 MHz, methanol- <i>d</i> <sub>4</sub> ) of compound <b>3</b> .....                                                                                          | <b>S14</b>     |
| <b>Figure S12</b>     | <sup>1</sup> H- <sup>1</sup> H COSY of compound <b>3</b> .....                                                                                                                              | <b>S15</b>     |
| <b>Figure S13</b>     | HSQC spectrum of compound <b>3</b> .....                                                                                                                                                    | <b>S16</b>     |
| <b>Figure S14</b>     | HMBC spectrum of compound <b>3</b> .....                                                                                                                                                    | <b>S17</b>     |
| <b>Figure S15</b>     | <sup>1</sup> H NMR spectrum (400 MHz, methanol- <i>d</i> <sub>4</sub> ) of compound <b>4</b> .....                                                                                          | <b>S18</b>     |
| <b>Figure S16</b>     | <sup>13</sup> C NMR spectrum of compound <b>4</b> .....                                                                                                                                     | <b>S19</b>     |
| <b>Figure S17</b>     | <sup>1</sup> H- <sup>1</sup> H COSY of compound <b>4</b> .....                                                                                                                              | <b>S20</b>     |
| <b>Figure S18</b>     | HSQC spectrum of compound <b>4</b> .....                                                                                                                                                    | <b>S21</b>     |
| <b>Figure S19</b>     | HMBC spectrum of compound <b>4</b> .....                                                                                                                                                    | <b>S22</b>     |
| <b>Figure S20</b>     | <sup>1</sup> H NMR spectrum (400 MHz, methanol- <i>d</i> <sub>4</sub> ) of compound <b>5</b> .....                                                                                          | <b>S23</b>     |
| <b>Figure S21</b>     | <sup>13</sup> C NMR spectrum of compound <b>5</b> .....                                                                                                                                     | <b>S24</b>     |
| <b>Figure S22</b>     | HSQC spectrum of compound <b>5</b> .....                                                                                                                                                    | <b>S25</b>     |
| <b>Figure S23</b>     | HMBC spectrum of compound <b>5</b> .....                                                                                                                                                    | <b>S26</b>     |
| <b>Figure S24</b>     | <sup>1</sup> H NMR spectrum of compound <b>7</b> ( <i>R</i> -MTPA of <b>1</b> ) (400 MHz, methanol- <i>d</i> <sub>4</sub> ).....                                                            | <b>S27</b>     |
| <b>Figure S25</b>     | <sup>1</sup> H NMR spectrum of compound <b>8</b> ( <i>S</i> -MTPA of <b>1</b> ) (400 MHz, methanol- <i>d</i> <sub>4</sub> ).....                                                            | <b>S28</b>     |
| <b>Figure S26</b>     | <sup>1</sup> H NMR spectrum of compound <b>9</b> ( <i>R</i> -MTPA of <b>2</b> ) (400 MHz, methanol- <i>d</i> <sub>4</sub> ).....                                                            | <b>S29</b>     |
| <b>Figure S27</b>     | <sup>1</sup> H- <sup>1</sup> H COSY of compound <b>9</b> ( <i>R</i> -MTPA of <b>2</b> ) .....                                                                                               | <b>S30</b>     |
| <b>Figure S28</b>     | <sup>1</sup> H NMR spectrum of compound <b>10</b> ( <i>S</i> -MTPA of <b>2</b> ) (400 MHz, methanol- <i>d</i> <sub>4</sub> ).....                                                           | <b>S31</b>     |
| <b>Figure S29</b>     | <sup>1</sup> H- <sup>1</sup> H COSY of compound <b>10</b> ( <i>R</i> -MTPA of <b>2</b> ) .....                                                                                              | <b>S32</b>     |
| <b>Figure S30</b>     | <sup>1</sup> H NMR spectrum of compound <b>11</b> (400 MHz, methanol- <i>d</i> <sub>4</sub> ) .....                                                                                         | <b>S33</b>     |
| <b>Figure S31</b>     | <sup>13</sup> C NMR spectrum of compound <b>11</b> .....                                                                                                                                    | <b>S34</b>     |
| <b>Figure S32</b>     | <sup>1</sup> H- <sup>1</sup> H COSY of compound <b>11</b> .....                                                                                                                             | <b>S35</b>     |
| <b>Figure S33</b>     | HSQC spectrum of compound <b>11</b> .....                                                                                                                                                   | <b>S36</b>     |
| <b>Figure S34</b>     | HMBC spectrum of compound <b>11</b> .....                                                                                                                                                   | <b>S37</b>     |
| <b>Figure S35</b>     | <sup>1</sup> H NMR spectrum of compound <b>12</b> ( <i>S</i> -MTPA of <b>11</b> ) (400 MHz, methanol- <i>d</i> <sub>4</sub> ).....                                                          | <b>S38</b>     |
| <b>Figure S36</b>     | <sup>1</sup> H NMR spectrum of compound <b>13</b> ( <i>R</i> -MTPA of <b>11</b> ) (400 MHz, methanol- <i>d</i> <sub>4</sub> ).....                                                          | <b>S39</b>     |
| <b>Figures S37-42</b> | HRESIMS spectra of compounds <b>1-5</b> , and <b>11</b> .....                                                                                                                               | <b>S40-S45</b> |
| <b>Figures S43-48</b> | IR spectra of compounds <b>1-5</b> , and <b>11</b> .....                                                                                                                                    | <b>S46-S51</b> |
| <b>Table S1</b>       | NMR Boltzmann averaged isotropic magnetic shielding values ( $\sigma$ ), unscaled ( $\delta_{\text{u}}$ ) and scaled ( $\delta_{\text{s}}$ ) chemical shifts of <b>1-3R</b> and <b>1-3S</b> | <b>S52</b>     |
| <b>Table S2</b>       | NMR Boltzmann averaged isotropic magnetic shielding values ( $\sigma$ ), unscaled ( $\delta_{\text{u}}$ ) and scaled ( $\delta_{\text{s}}$ ) chemical shifts of <b>2-3R</b> and <b>2-3S</b> | <b>S53</b>     |
| <b>Table S3</b>       | NMR Boltzmann averaged isotropic magnetic shielding values ( $\sigma$ ), unscaled                                                                                                           | <b>S54</b>     |

|                                                   |                                                                                                                                                                              |            |
|---------------------------------------------------|------------------------------------------------------------------------------------------------------------------------------------------------------------------------------|------------|
|                                                   | ( $\delta_u$ ) and scaled ( $\delta_c$ ) chemical shifts of <b>3-3R</b> and <b>3-3S</b>                                                                                      |            |
| <b>Table S4</b>                                   | NMR Boltzmann averaged isotropic magnetic shielding values ( $\sigma$ ), unscaled<br>( $\delta_u$ ) and scaled ( $\delta_c$ ) chemical shifts of <b>4-3E</b> and <b>4-3Z</b> | <b>S55</b> |
| <b>Table S5</b>                                   | NMR Boltzmann averaged isotropic magnetic shielding values ( $\sigma$ ), unscaled<br>( $\delta_u$ ) and scaled ( $\delta_c$ ) chemical shifts of <b>5-3R</b> and <b>5-3S</b> | <b>S56</b> |
| <b>Cartesian<br/>coordinates<br/>and energies</b> | Cartesian Coordinates of all significantly populated conformers found for all<br>compounds under study at the PCM/B3LYP/6-31G* level of theory                               | <b>S57</b> |



# <sup>13</sup>C NMR spectrum of compound 1

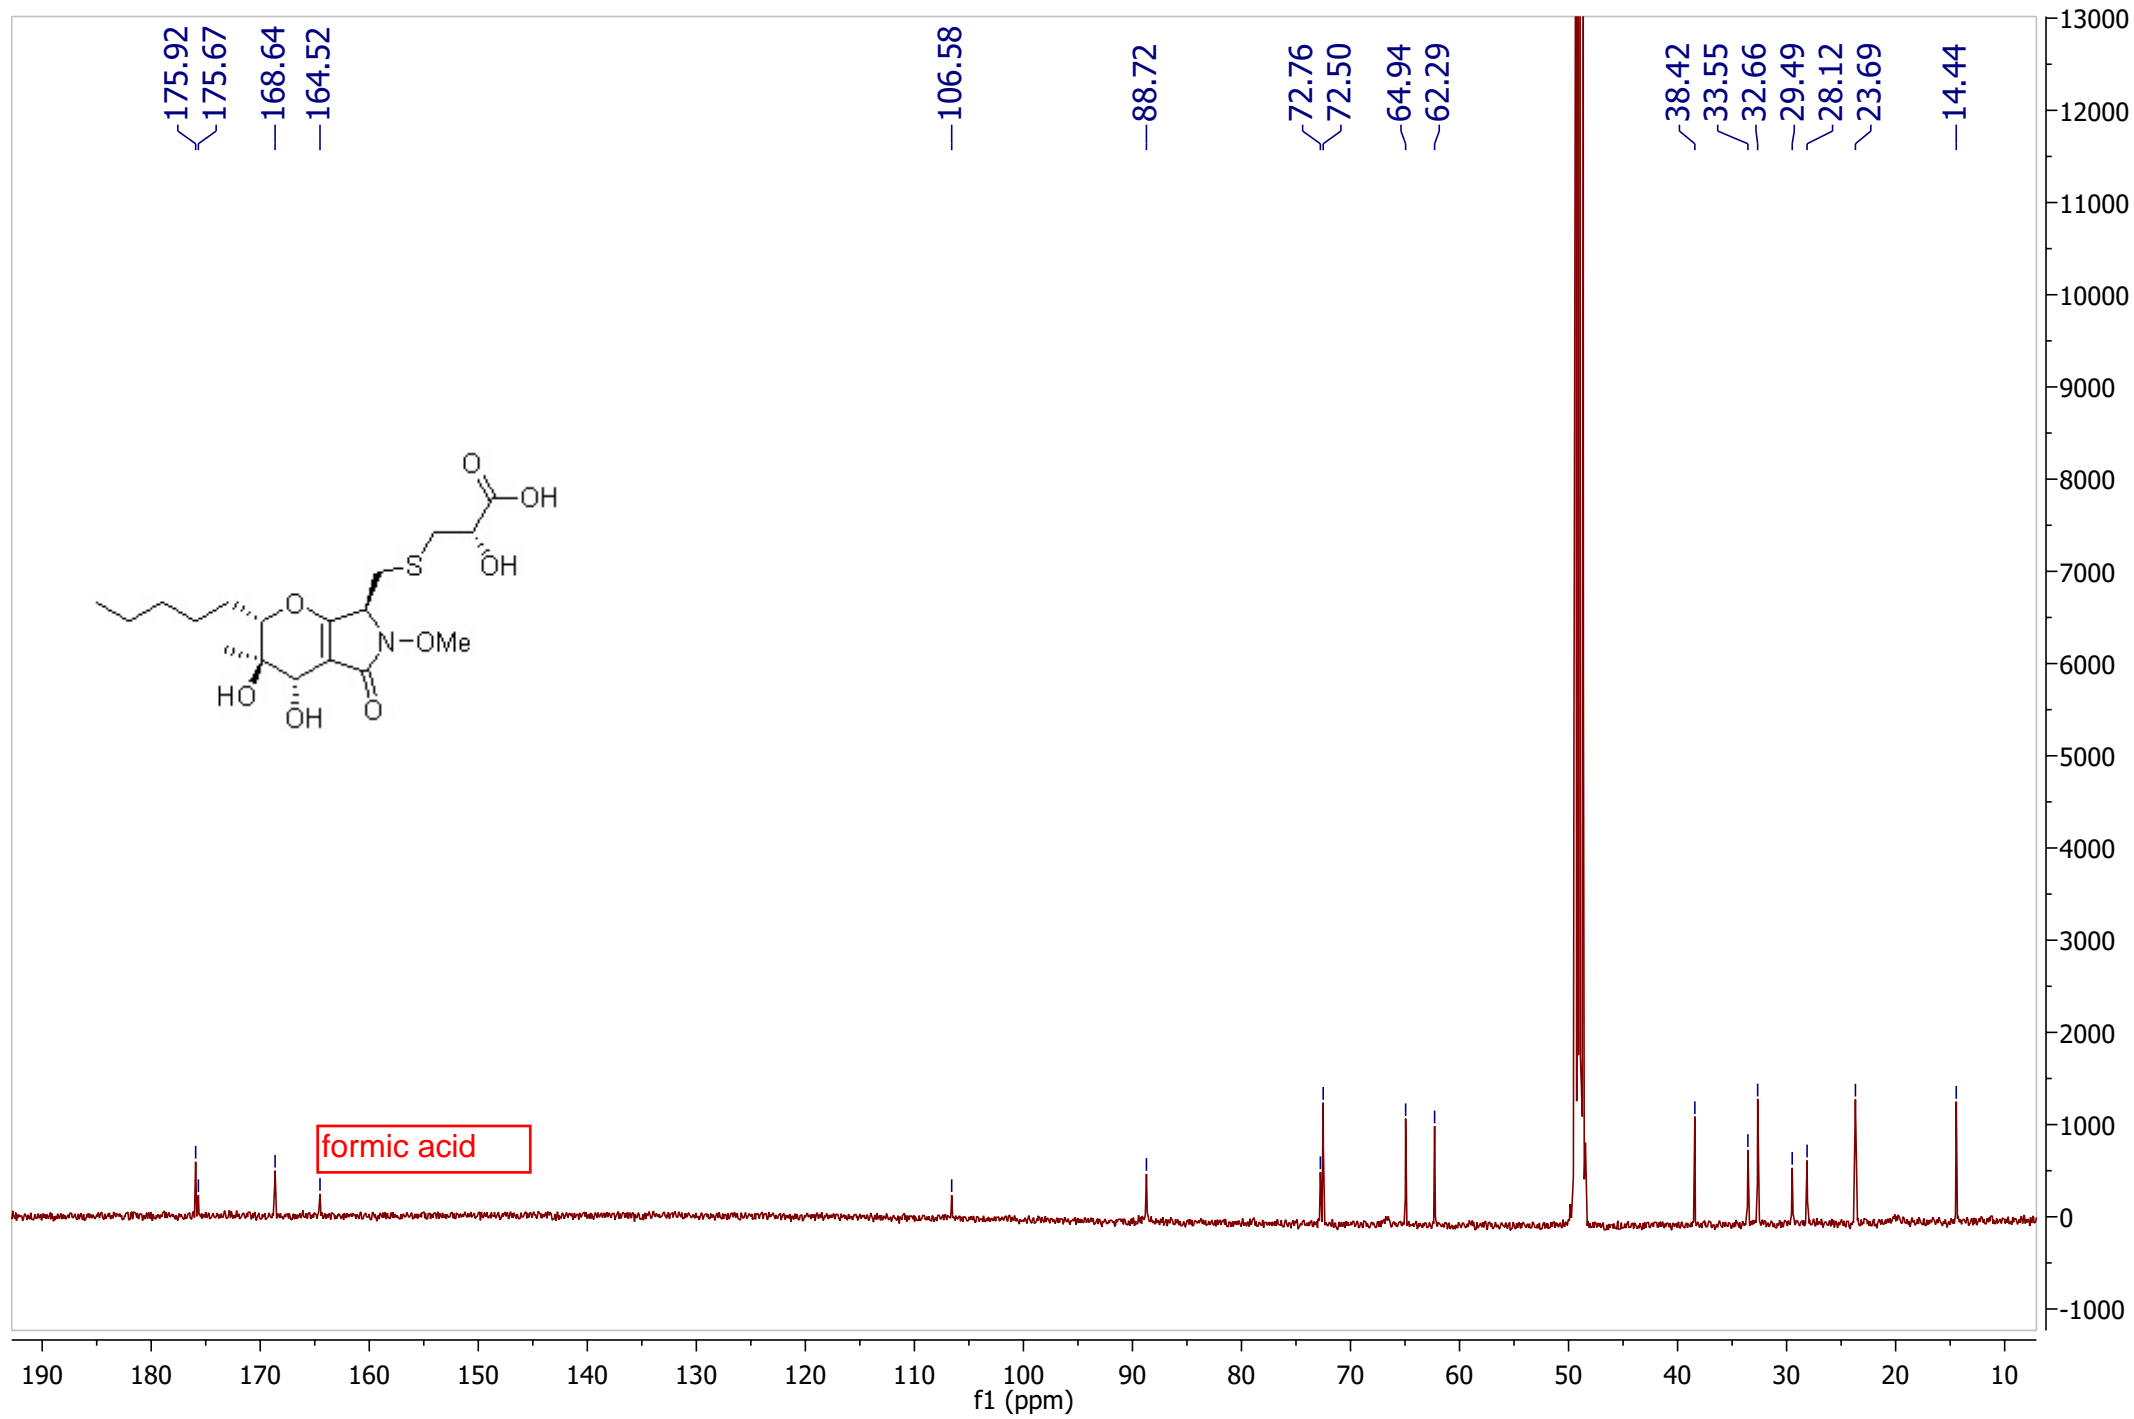

# $^1\text{H}$ - $^1\text{H}$ COSY of compound **1**

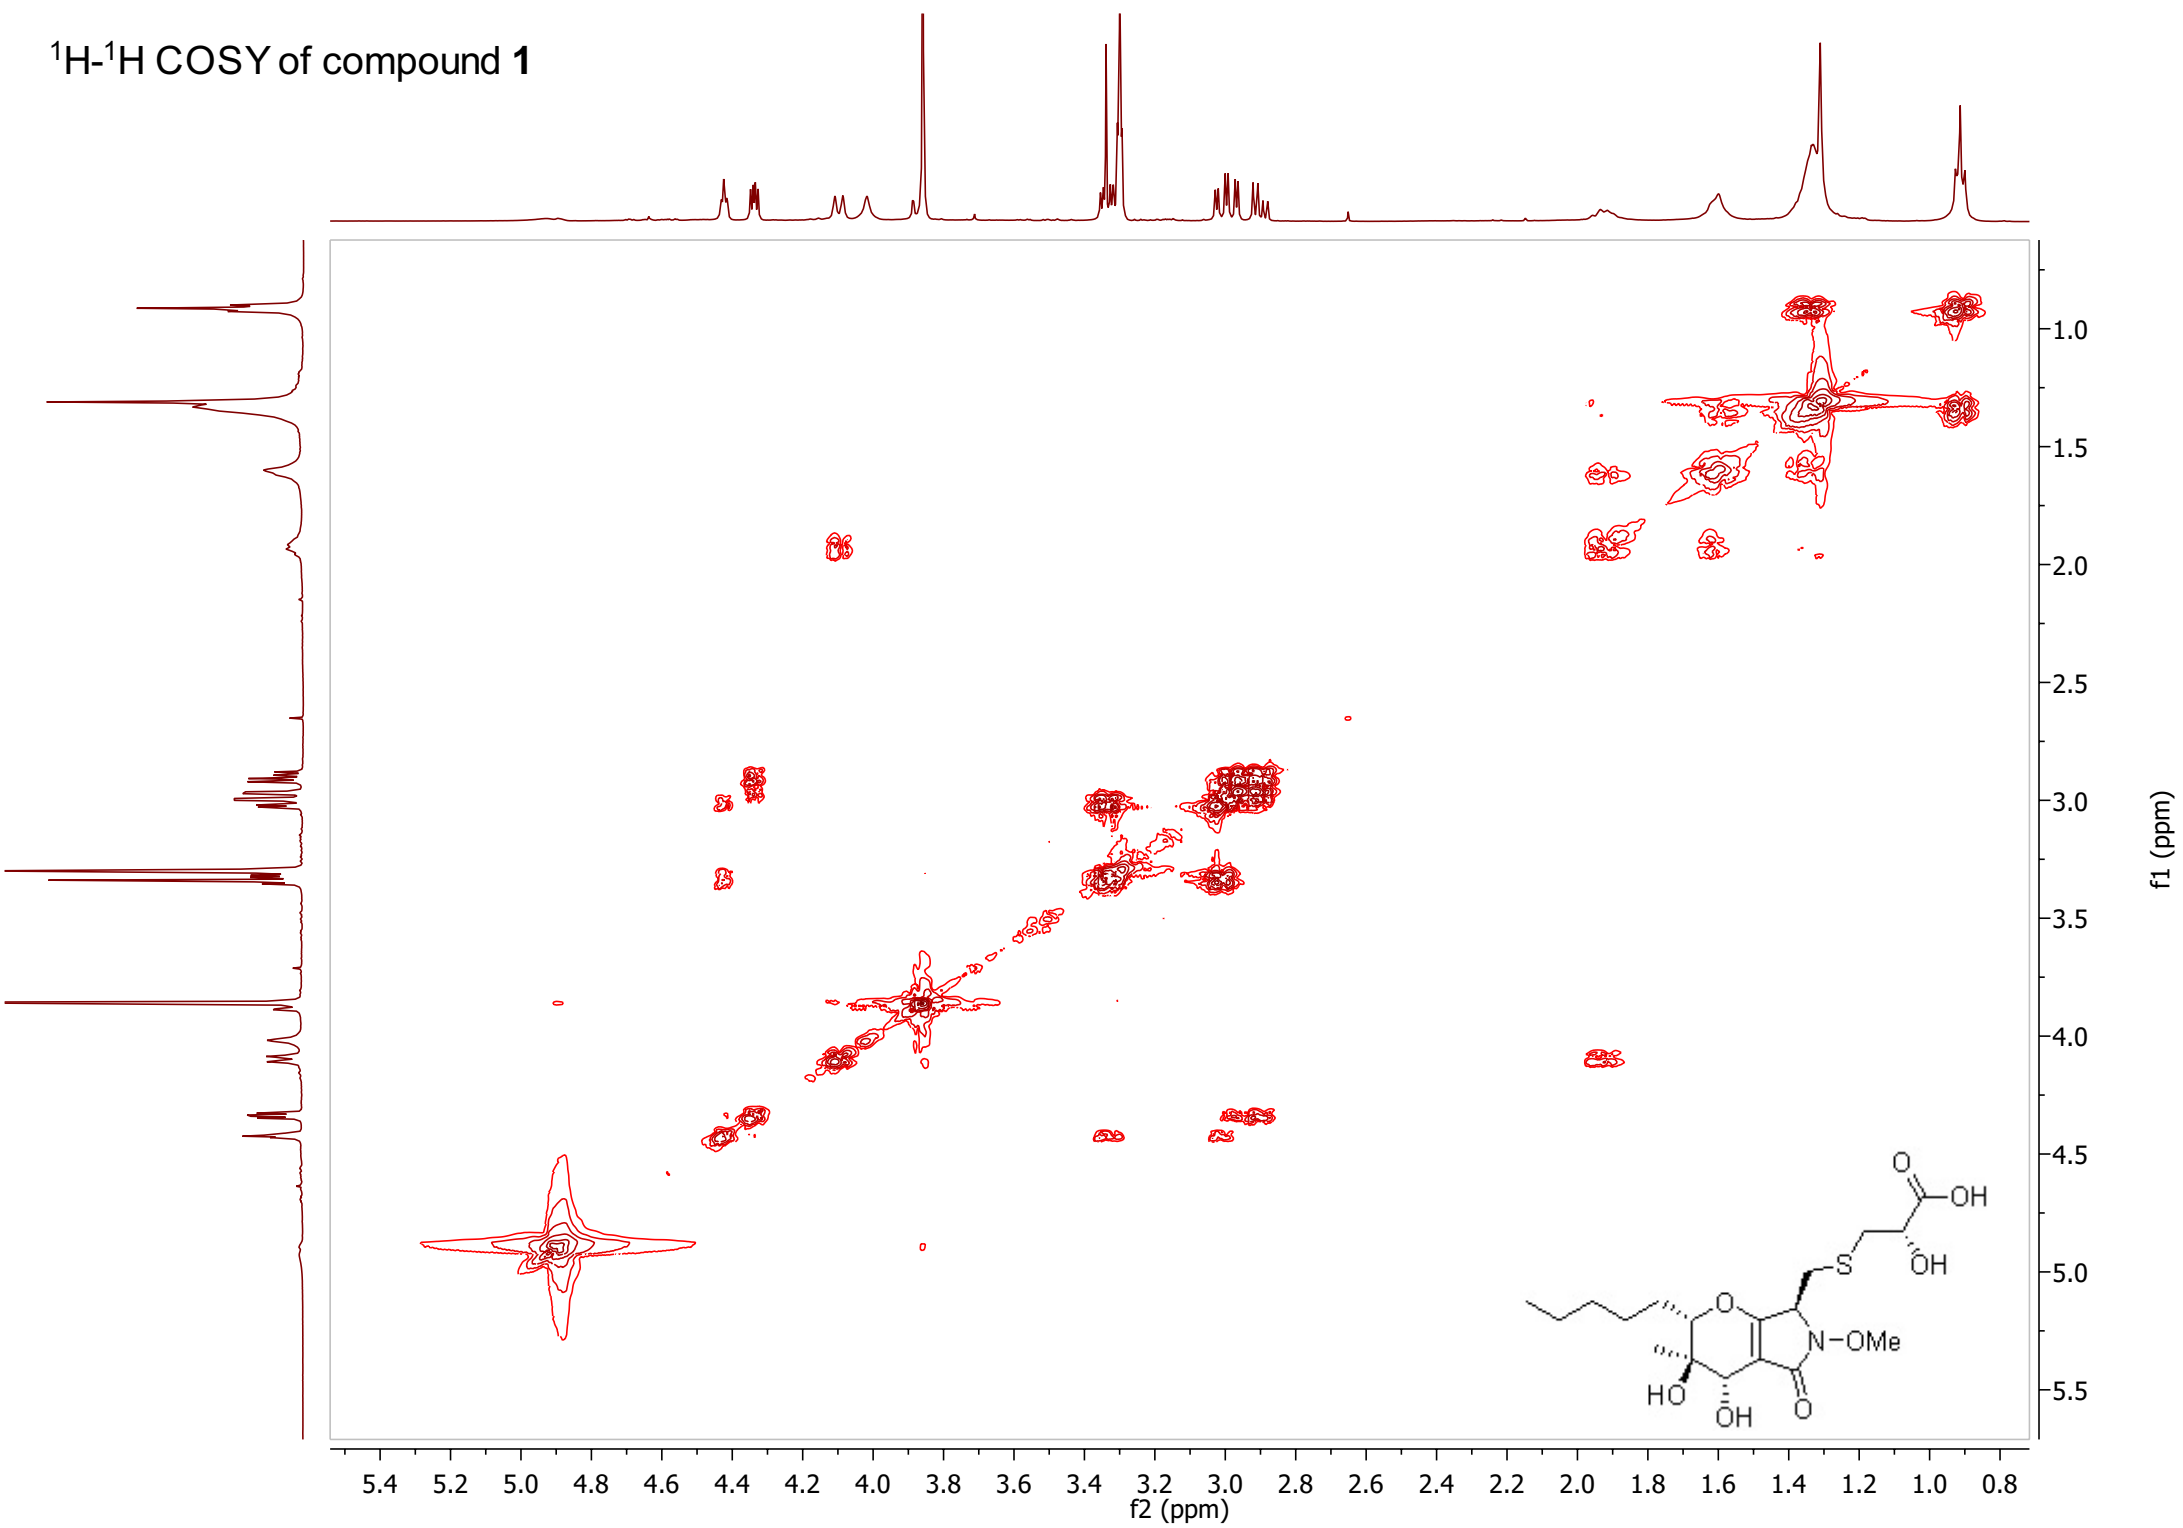

# HSQC spectrum of compound 1

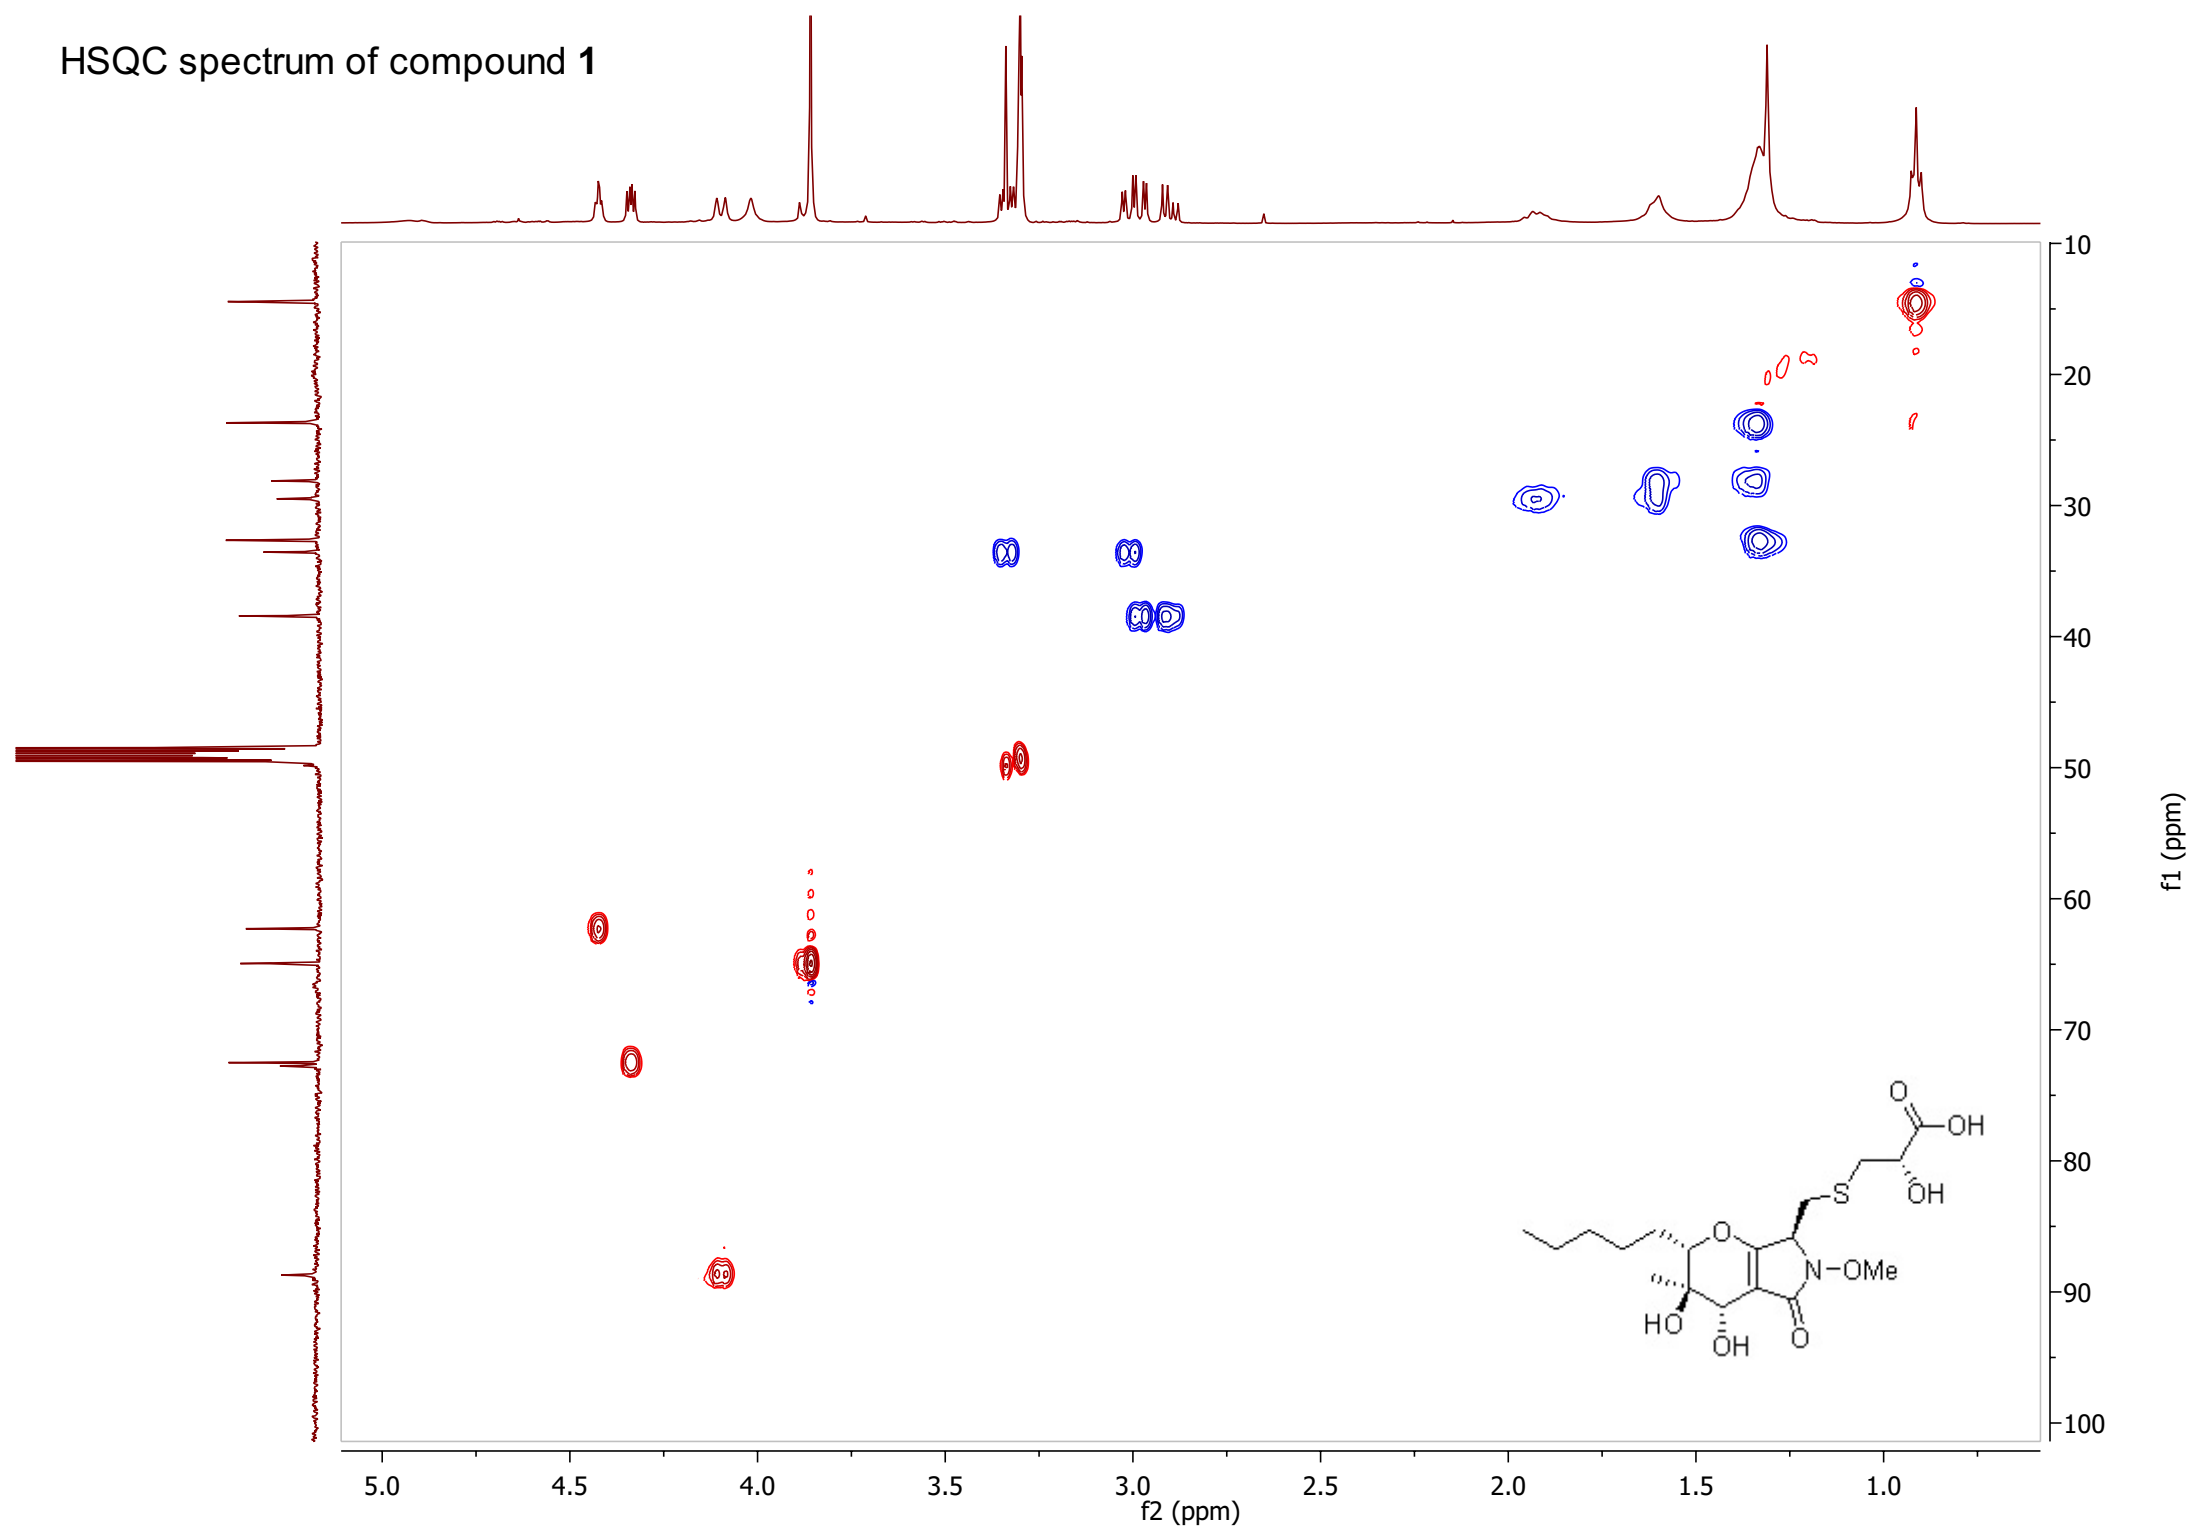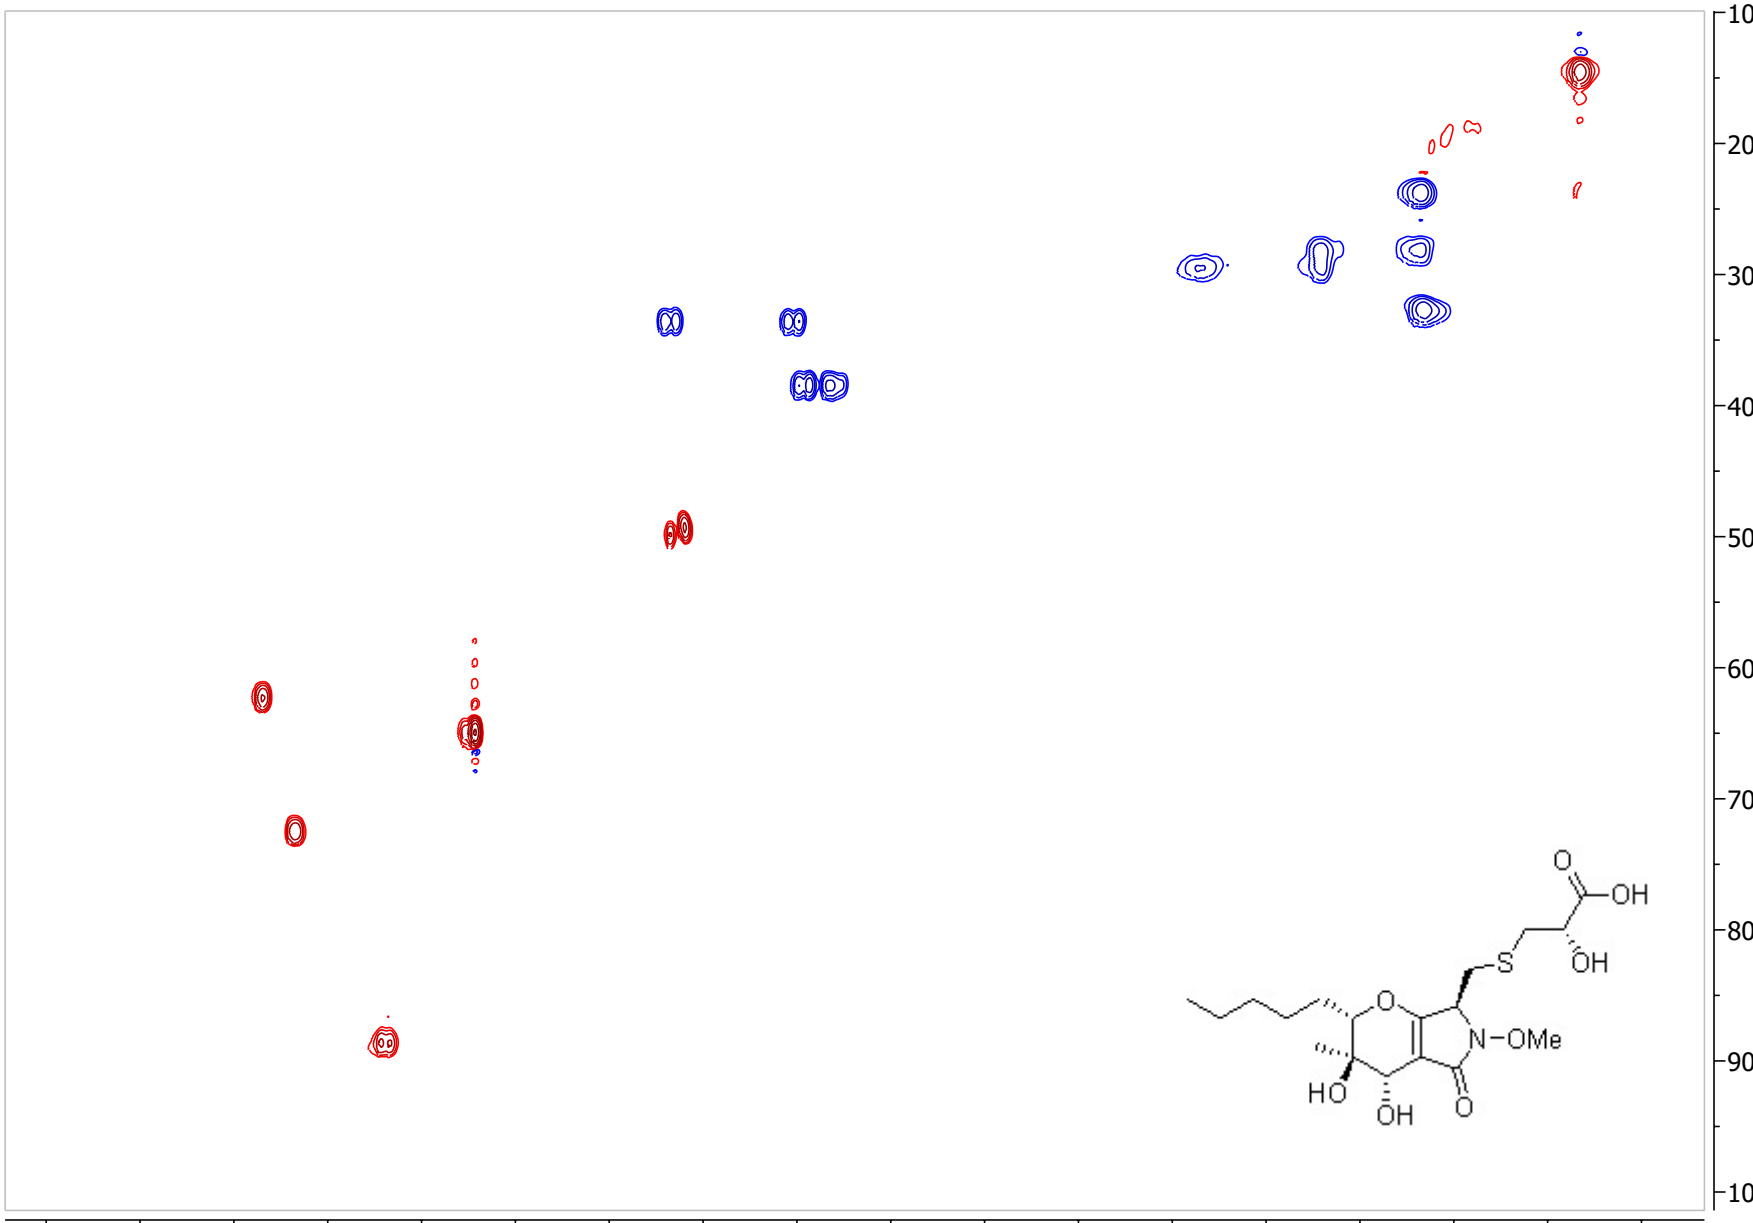

# HMBC spectrum of compound 1

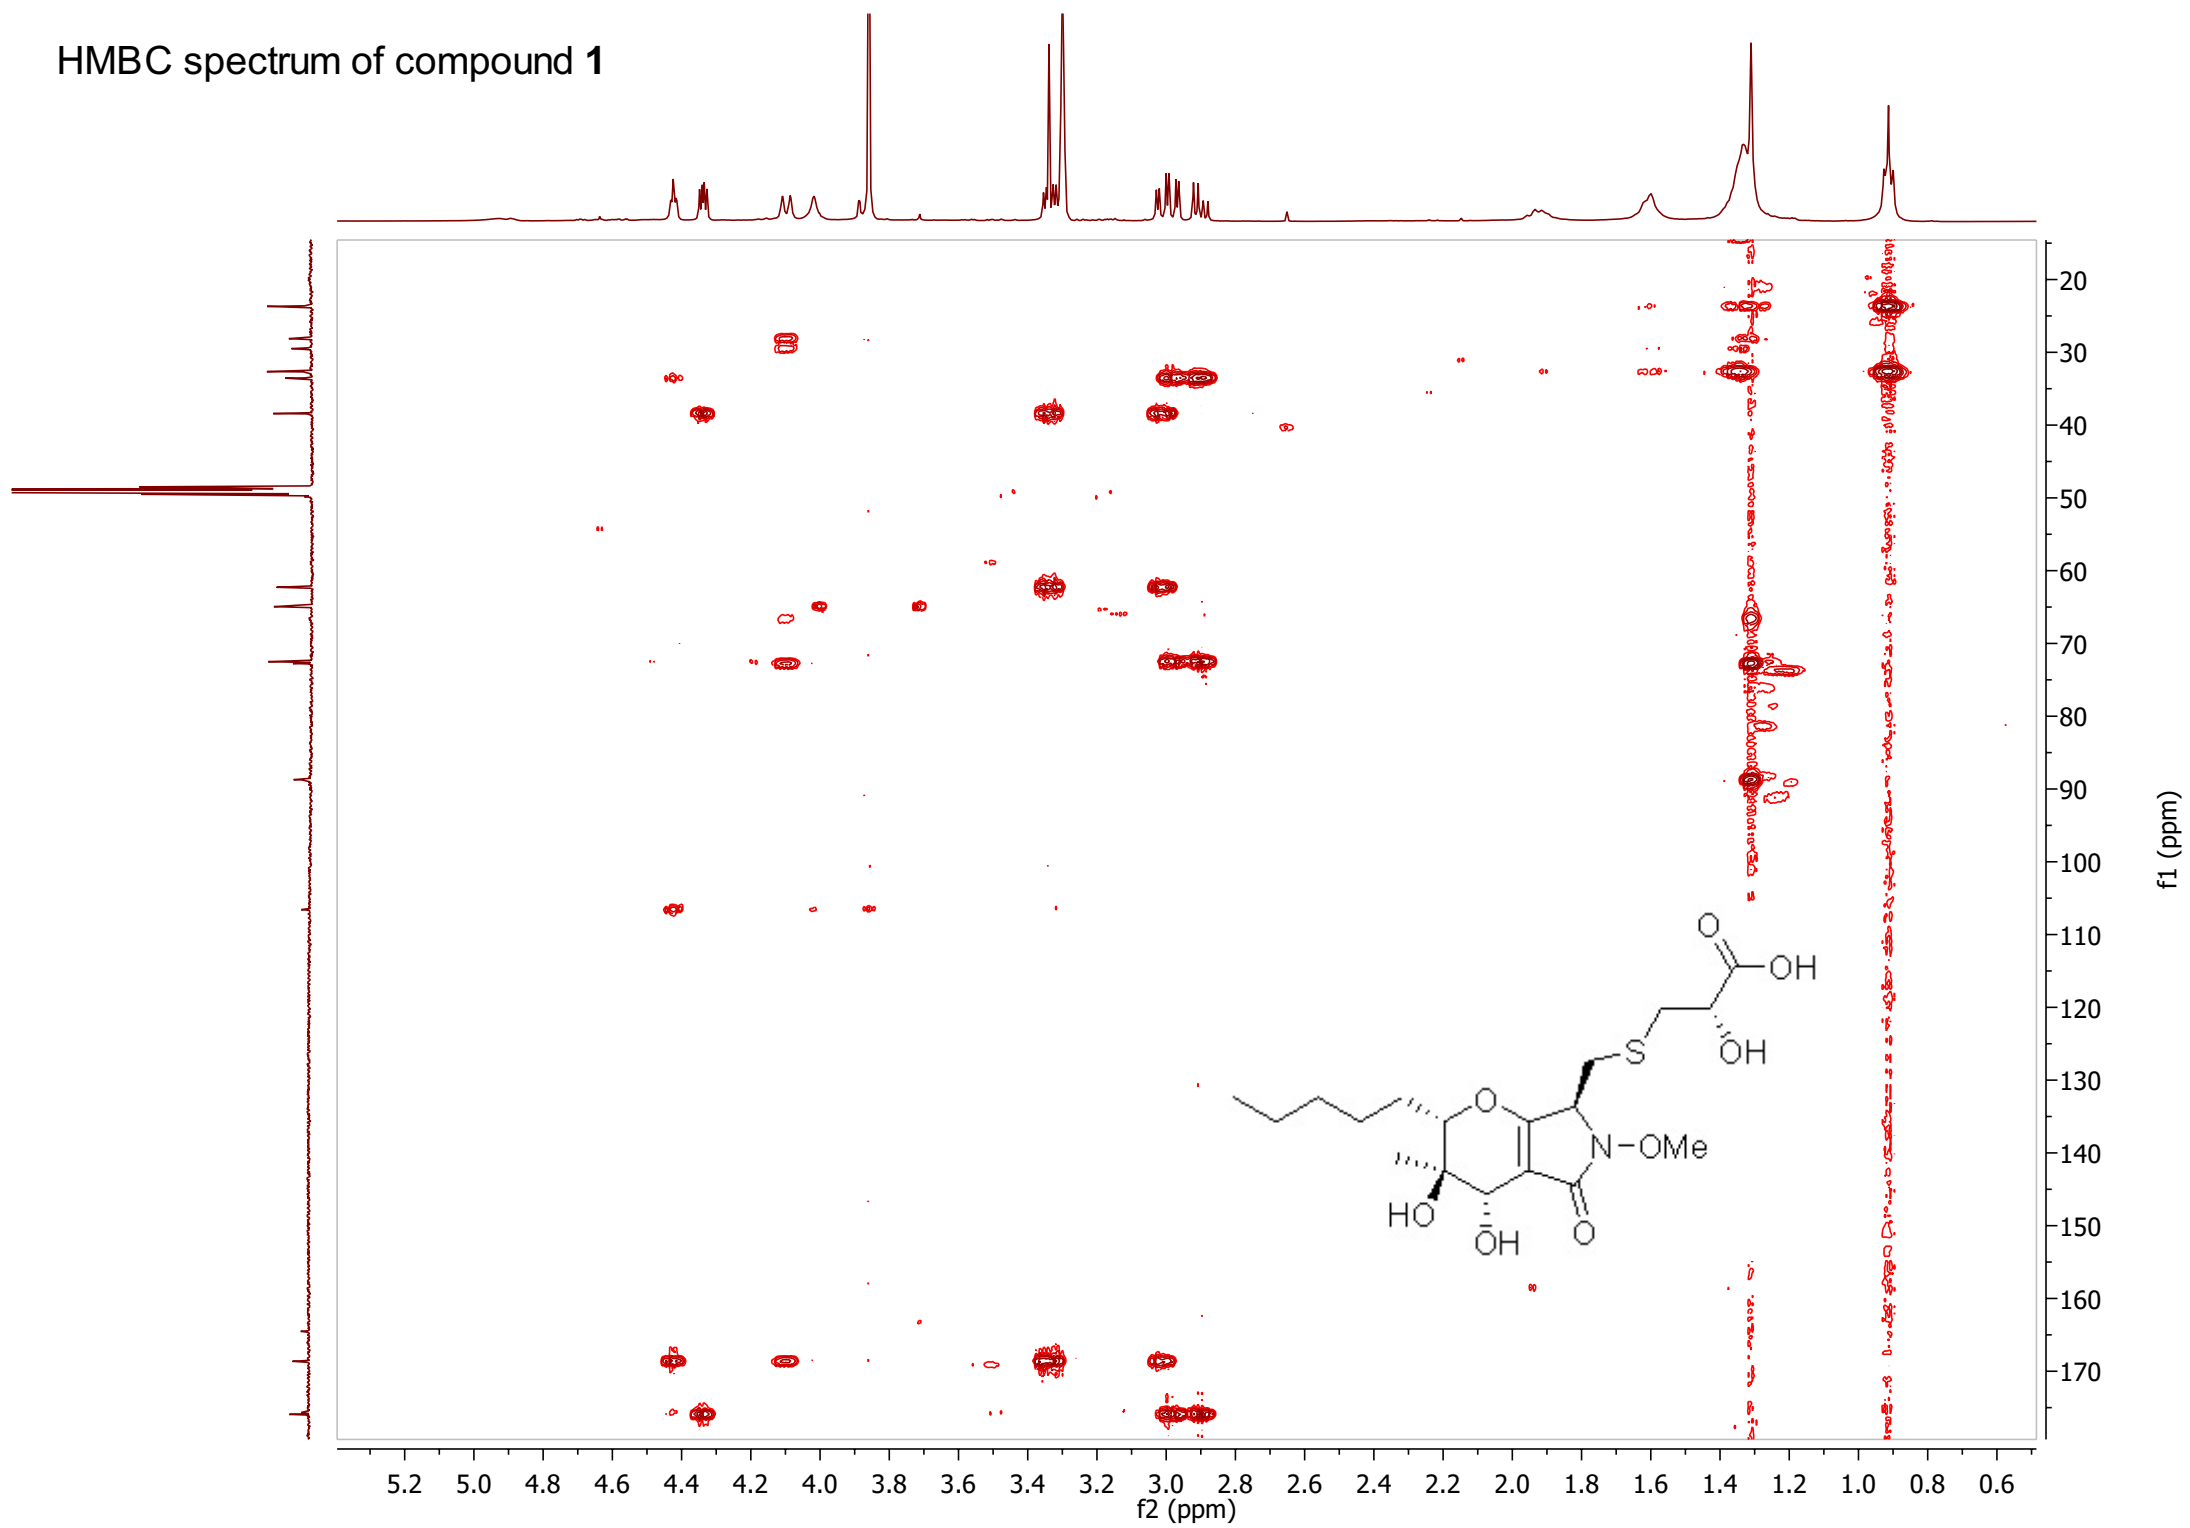



<sup>1</sup>H NMR spectrum of compound **2** (500 MHz in methanol-d<sub>4</sub>)

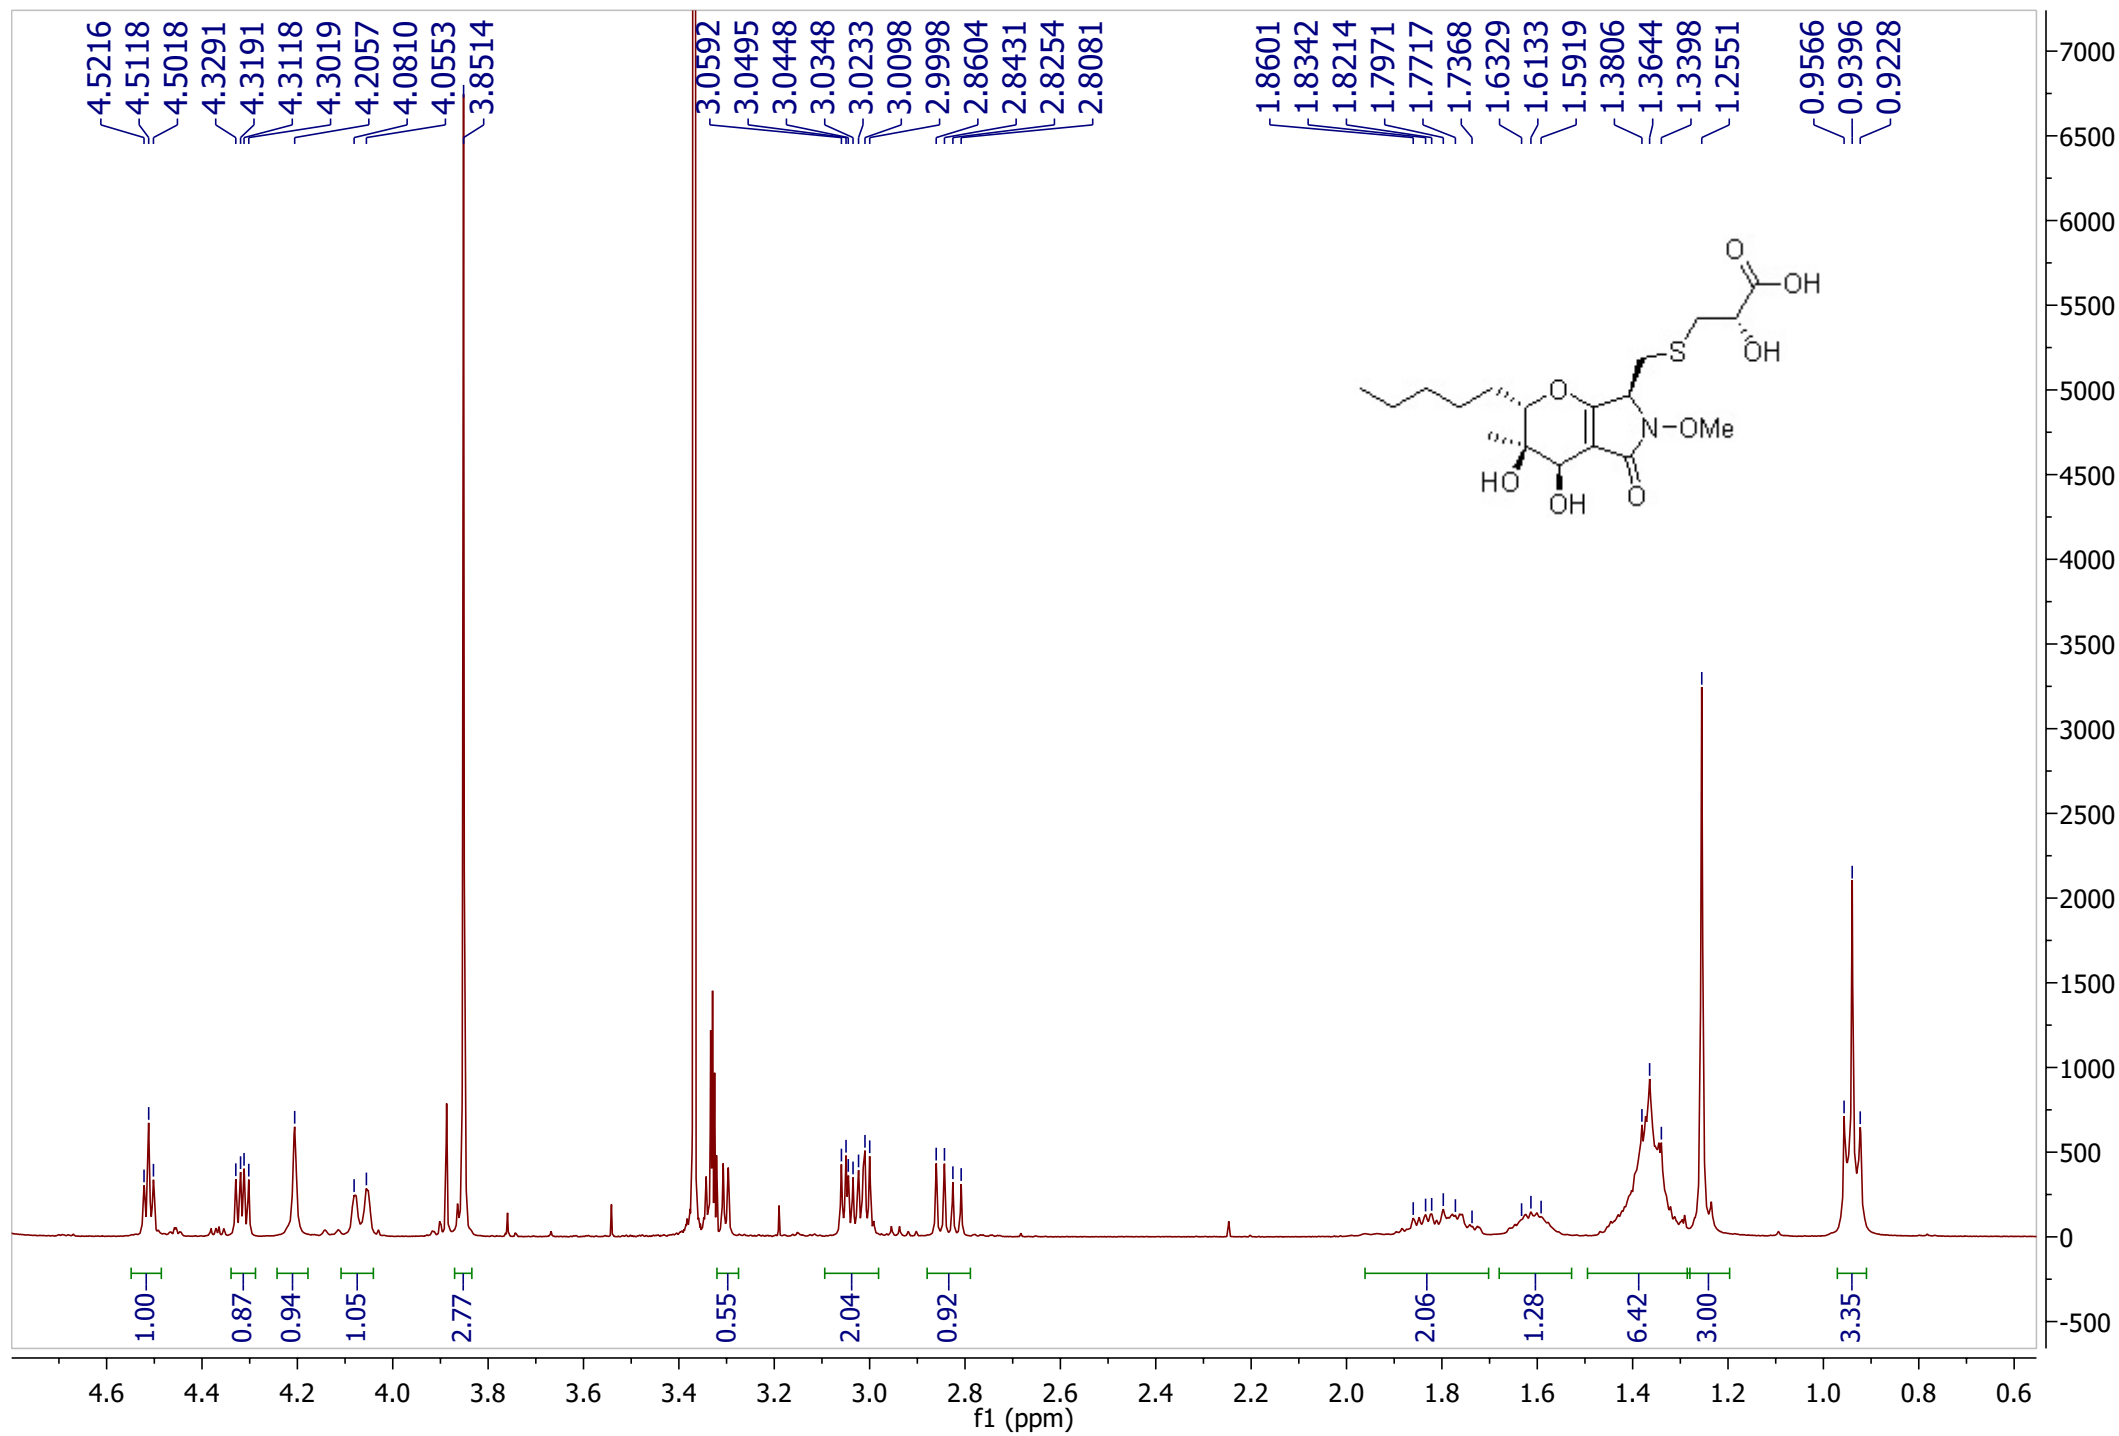

# <sup>13</sup>C NMR spectrum of compound 2

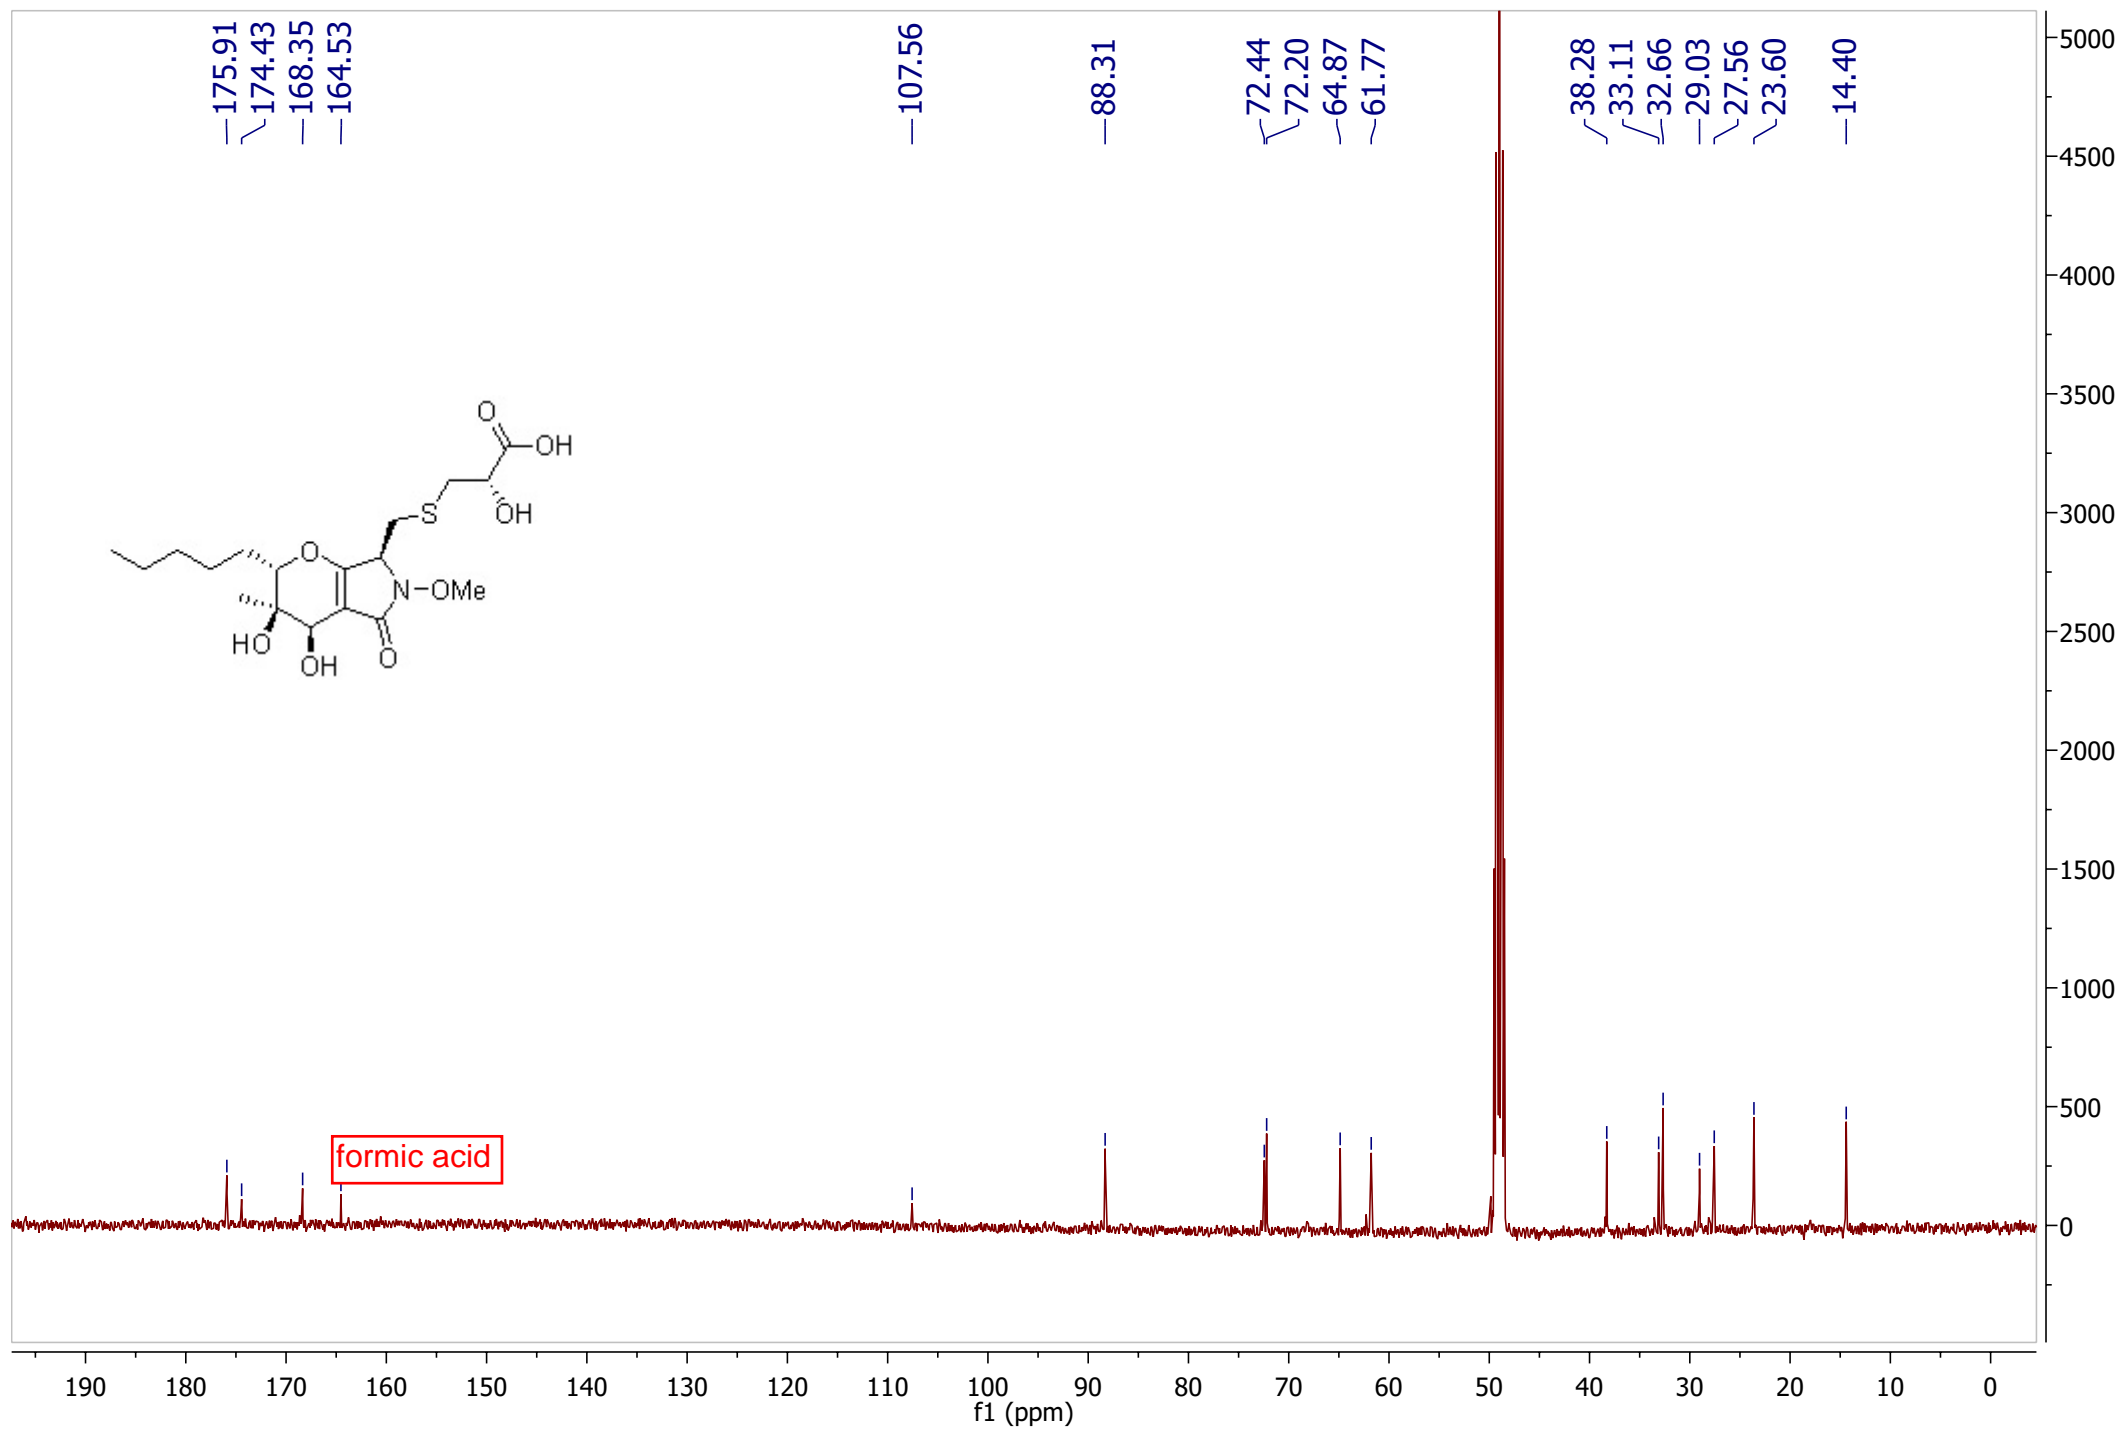

$^1\text{H}$ - $^1\text{H}$  COSY of compound 2

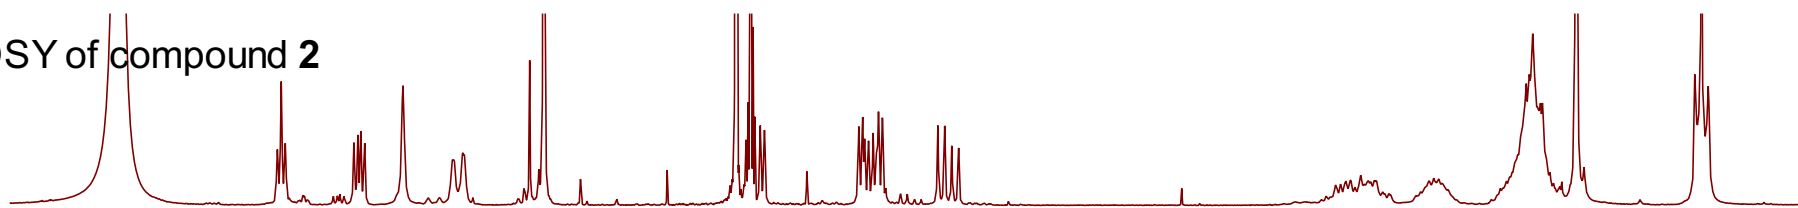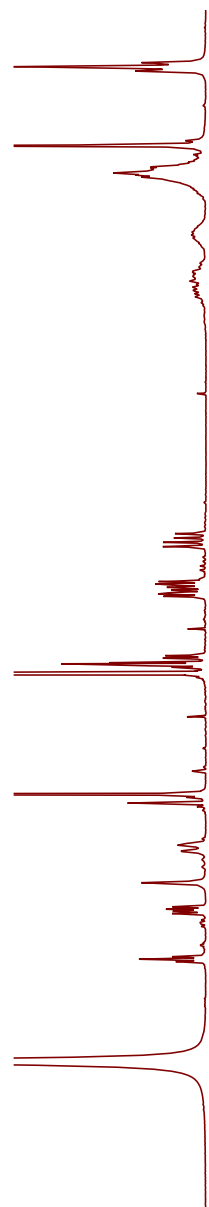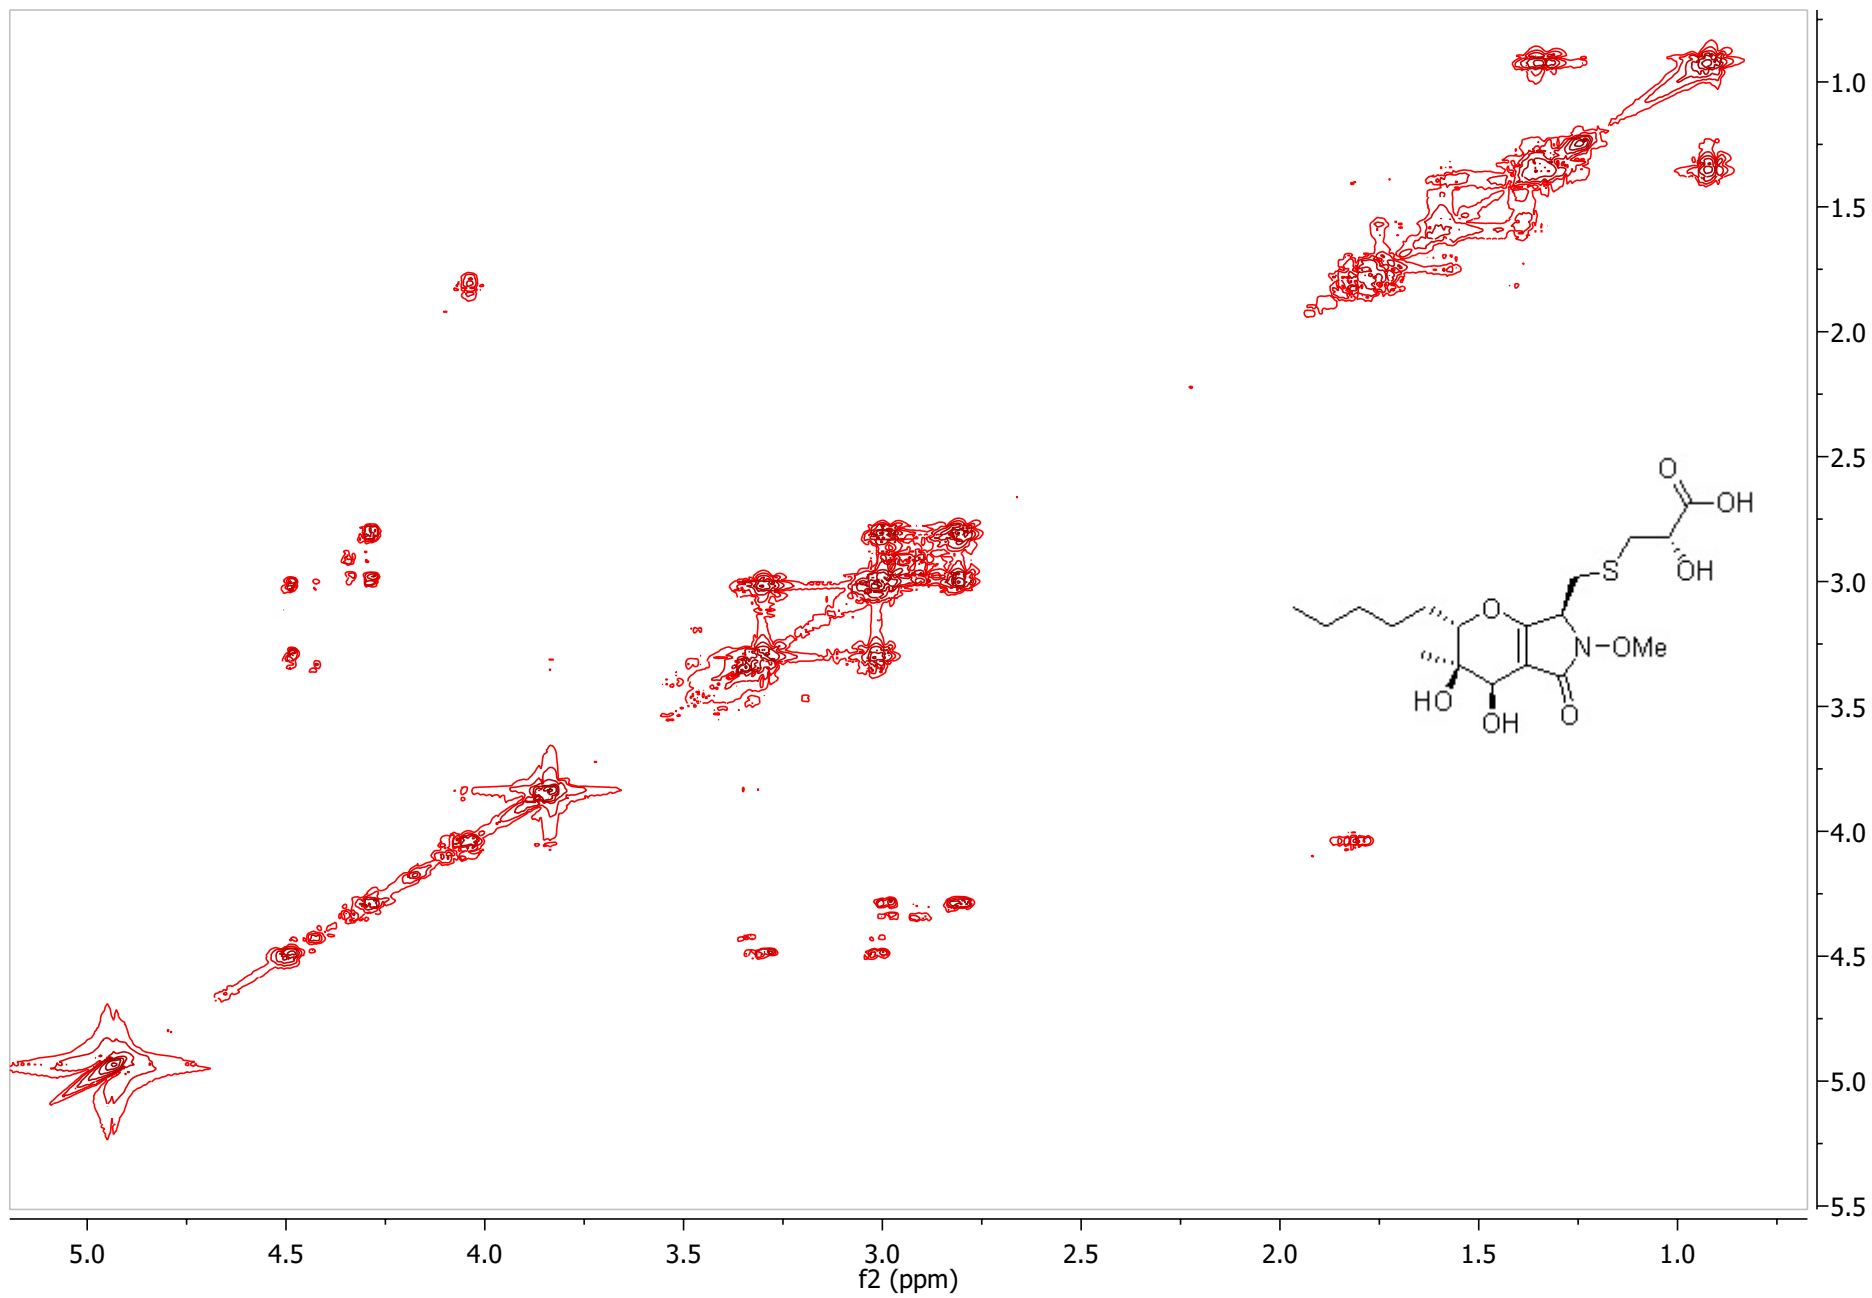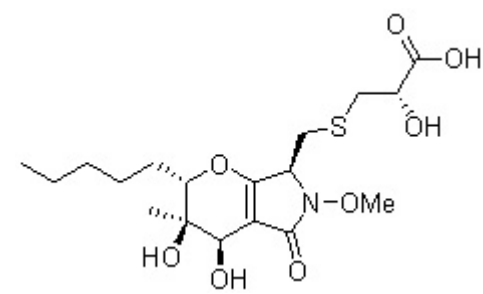

# HSQC NMR spectrum of compound 2

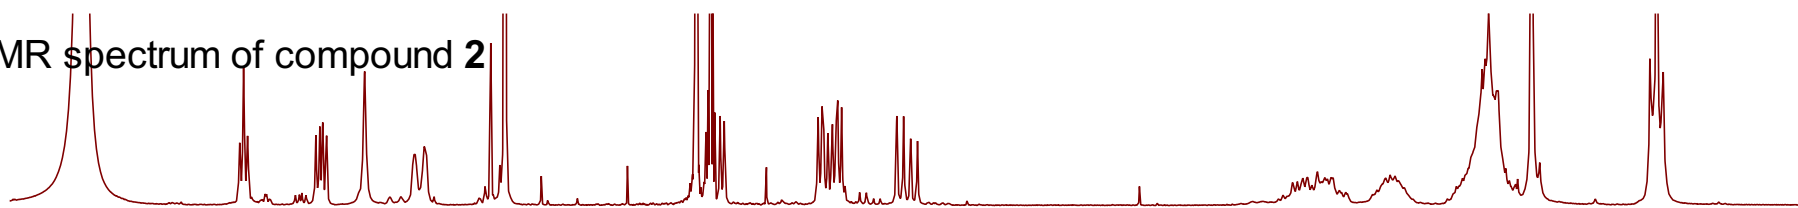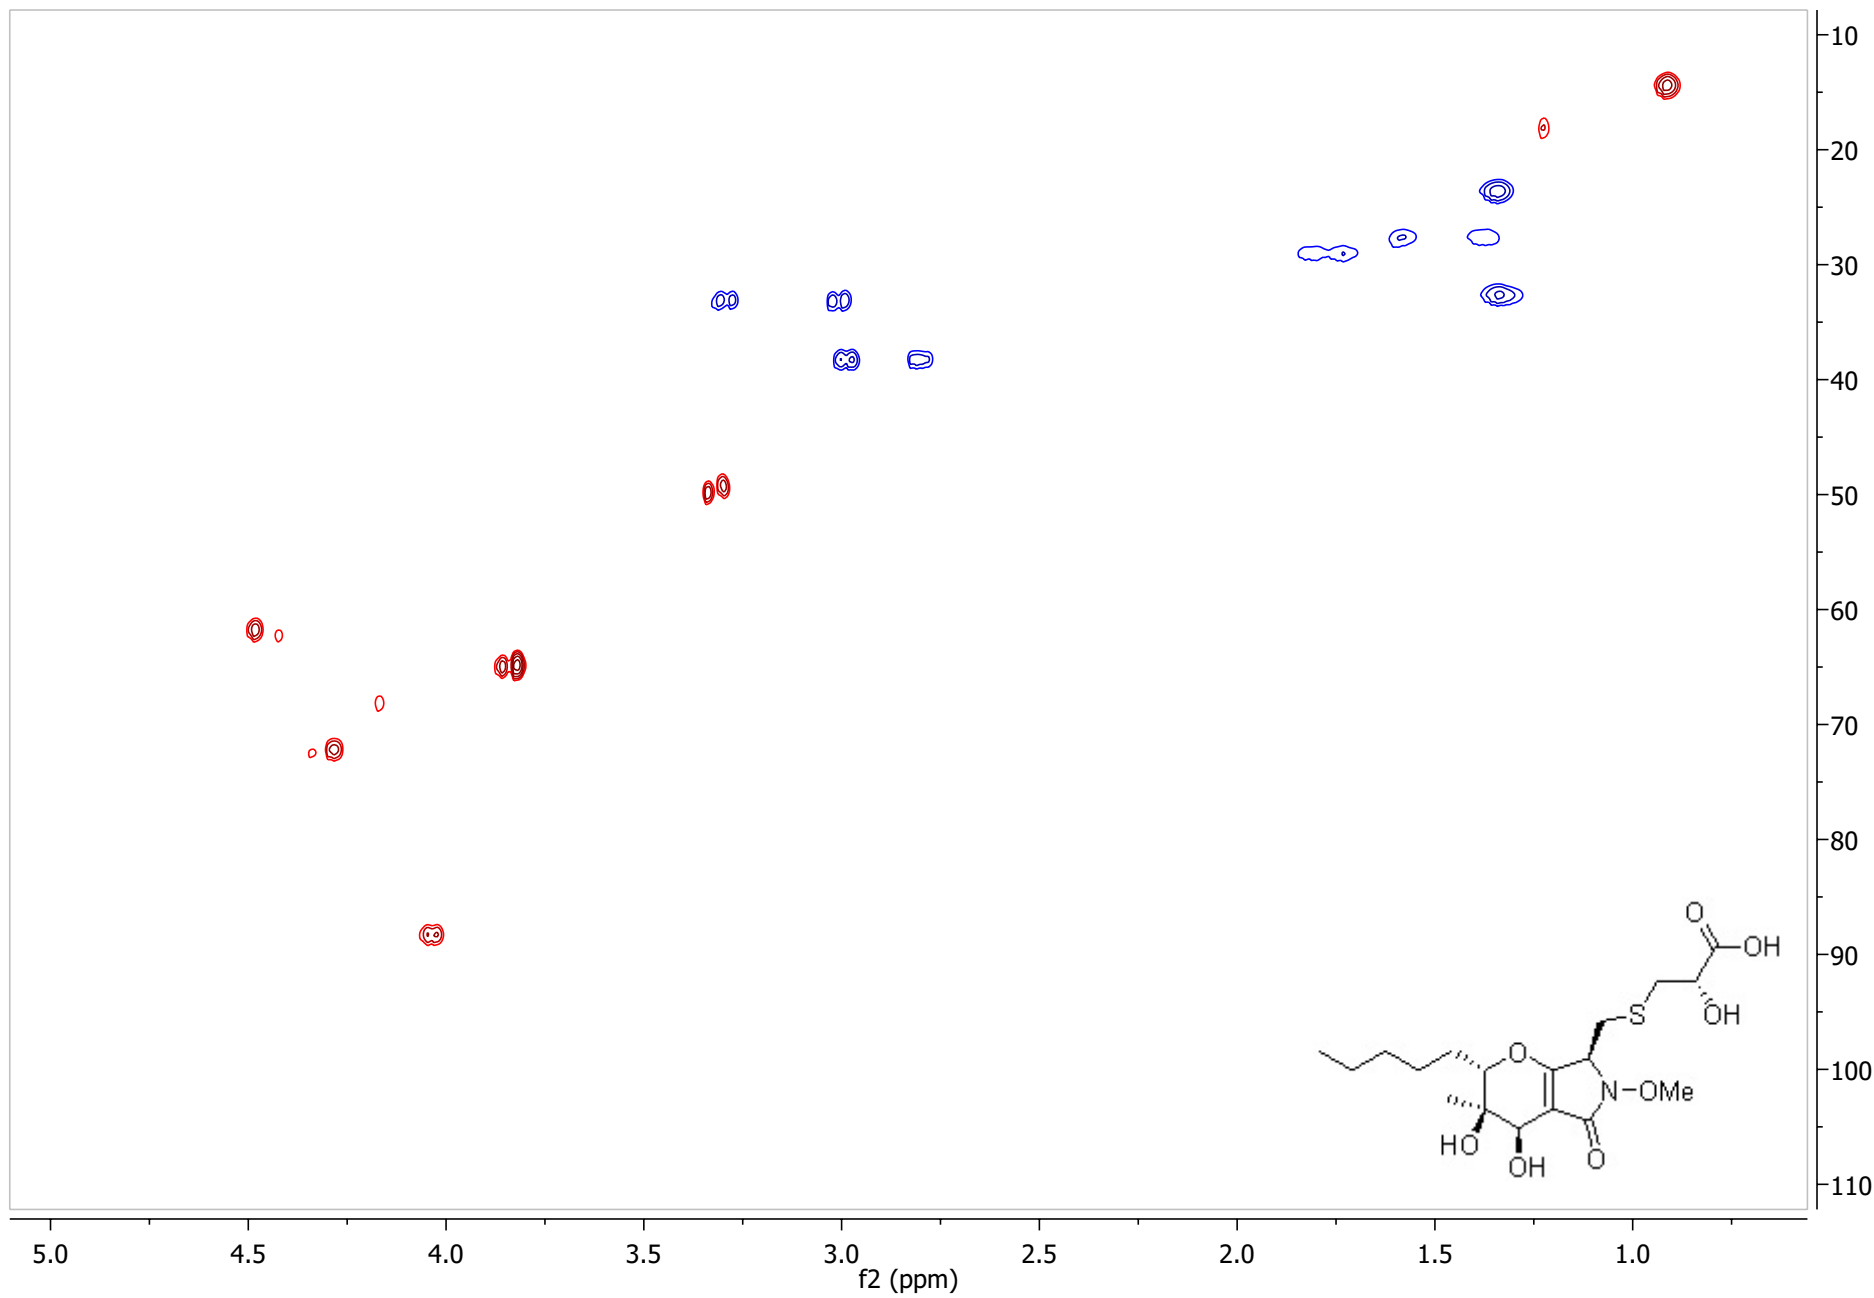

f1 (ppm)

f2 (ppm)

# HMBC NMR spectrum of compound 2

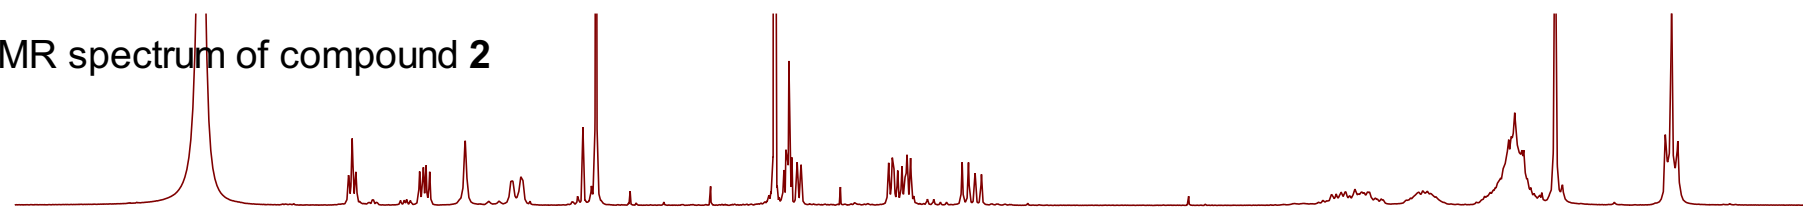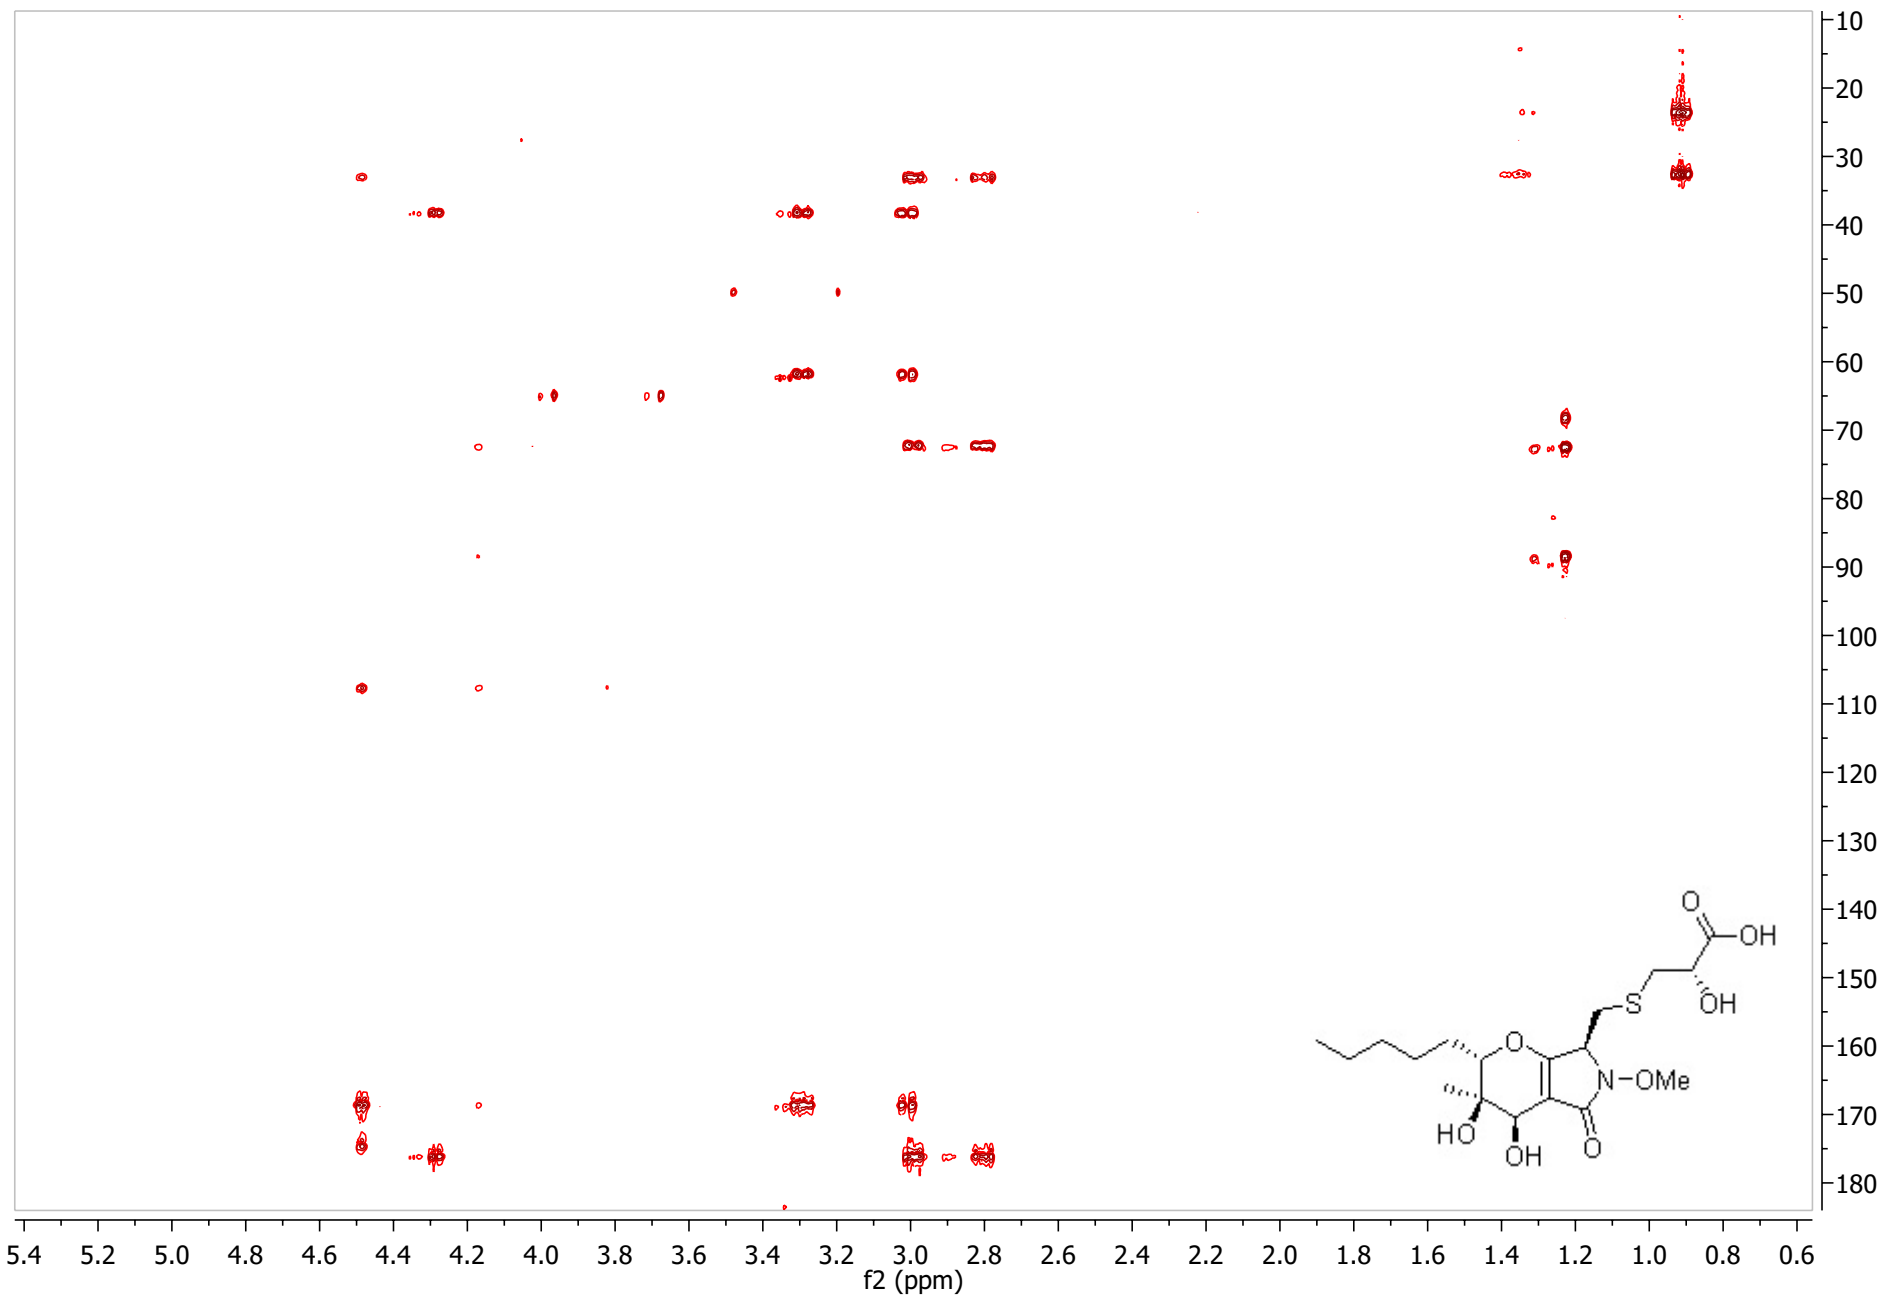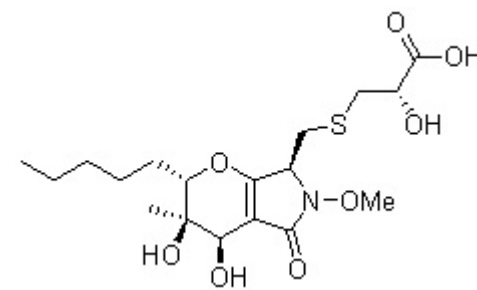

<sup>1</sup>H NMR spectrum of compound **3** (400 MHz in methanol-d<sub>4</sub>)

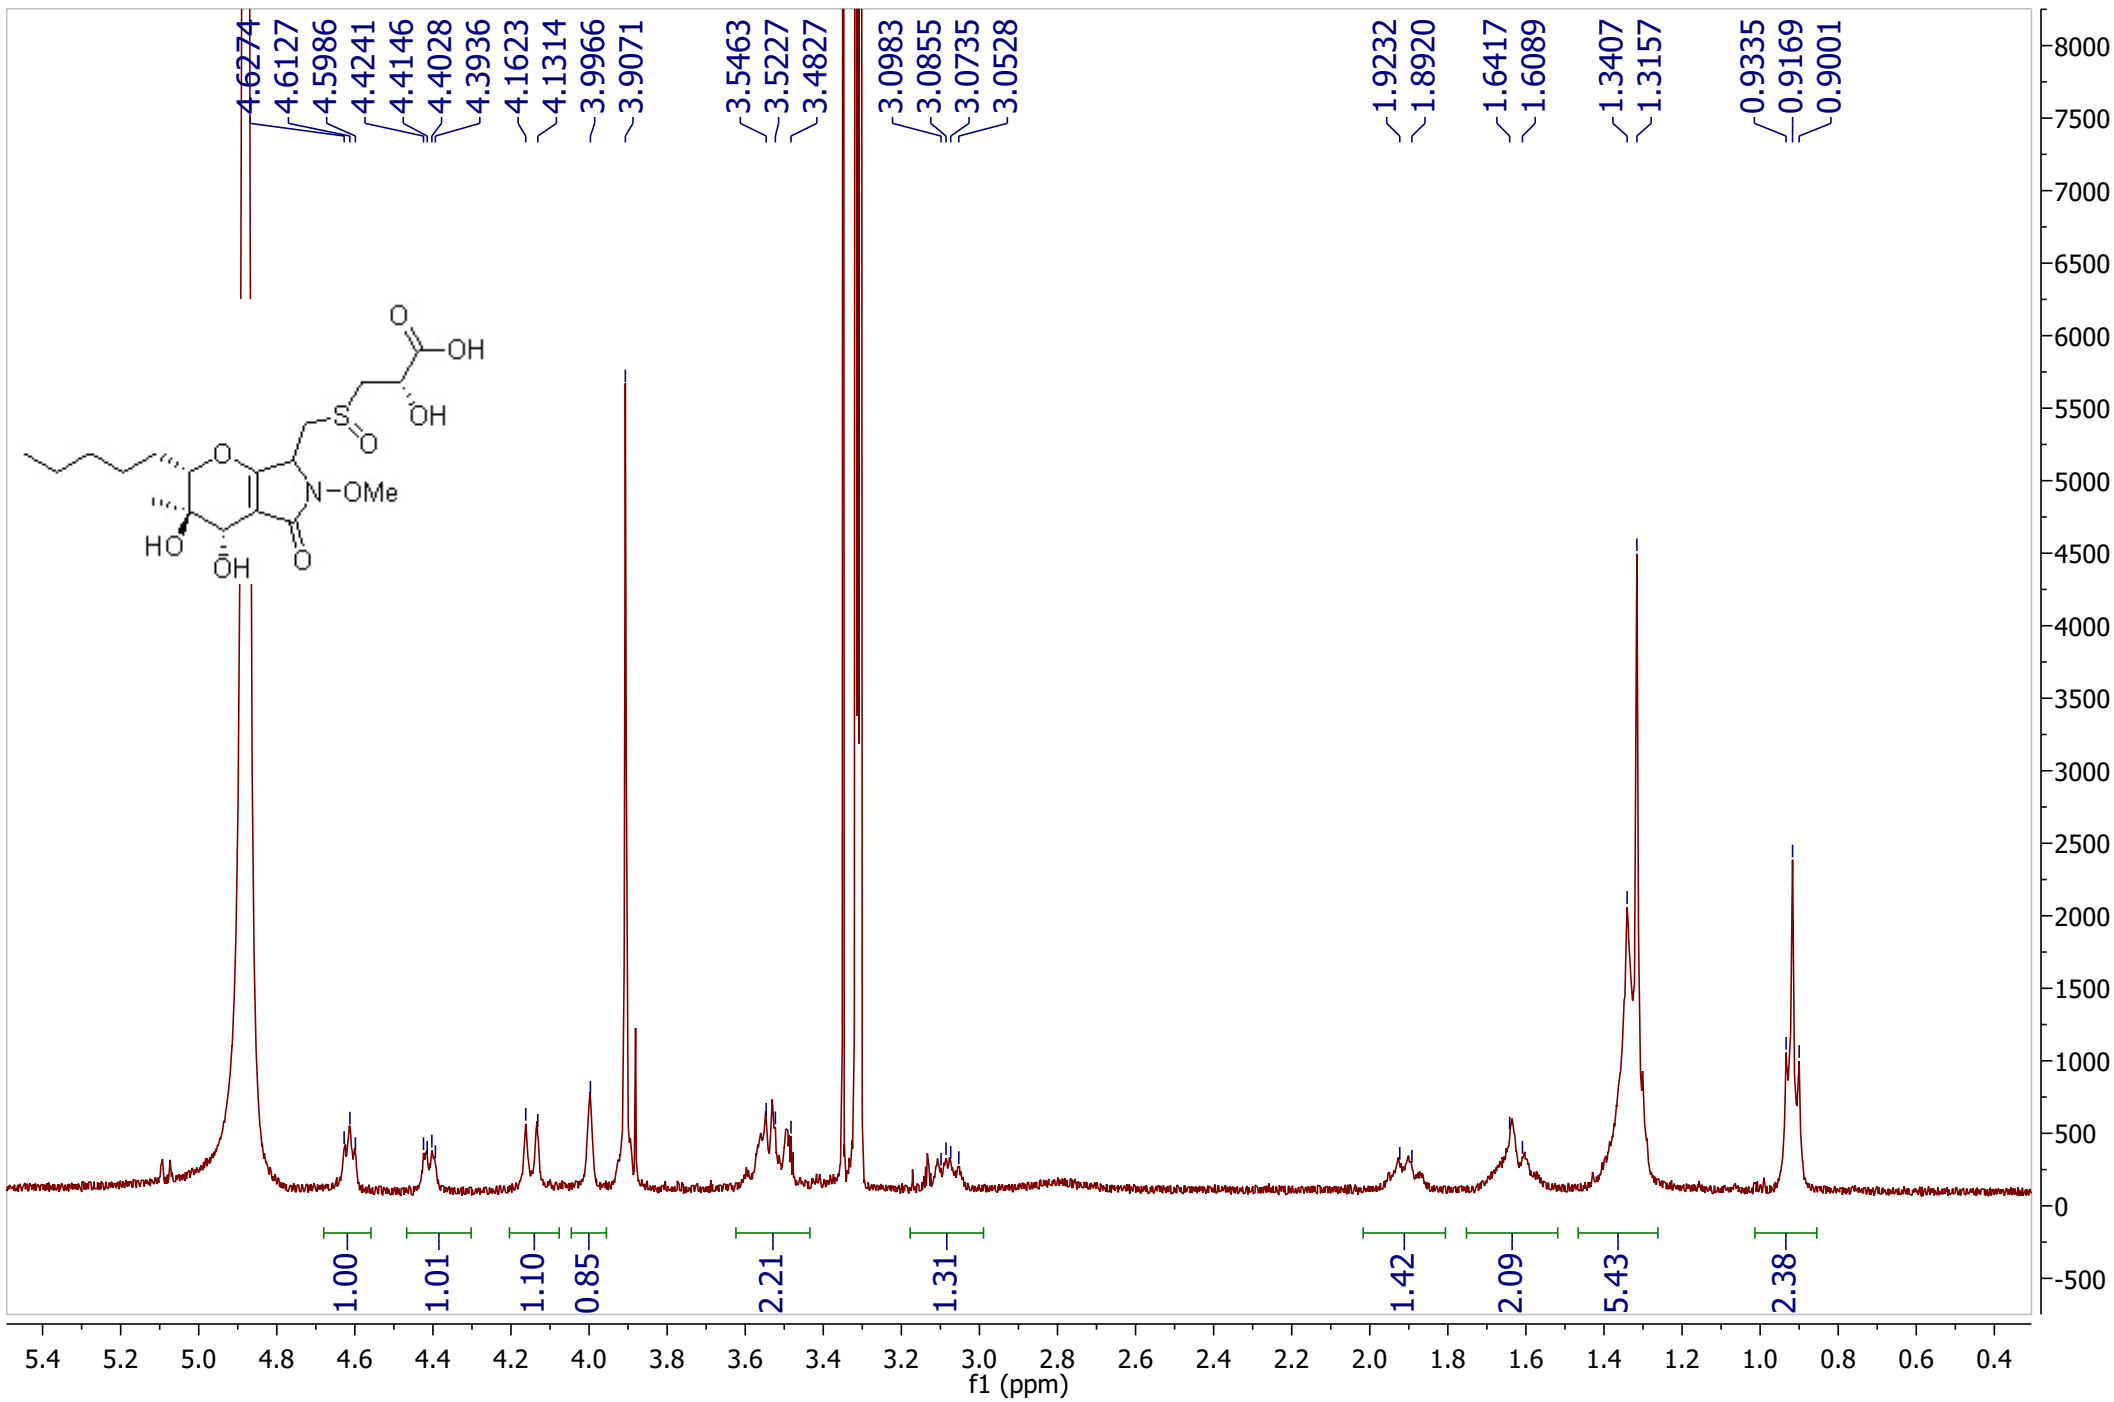

$^1\text{H}$ - $^1\text{H}$  COSY of compound **3**

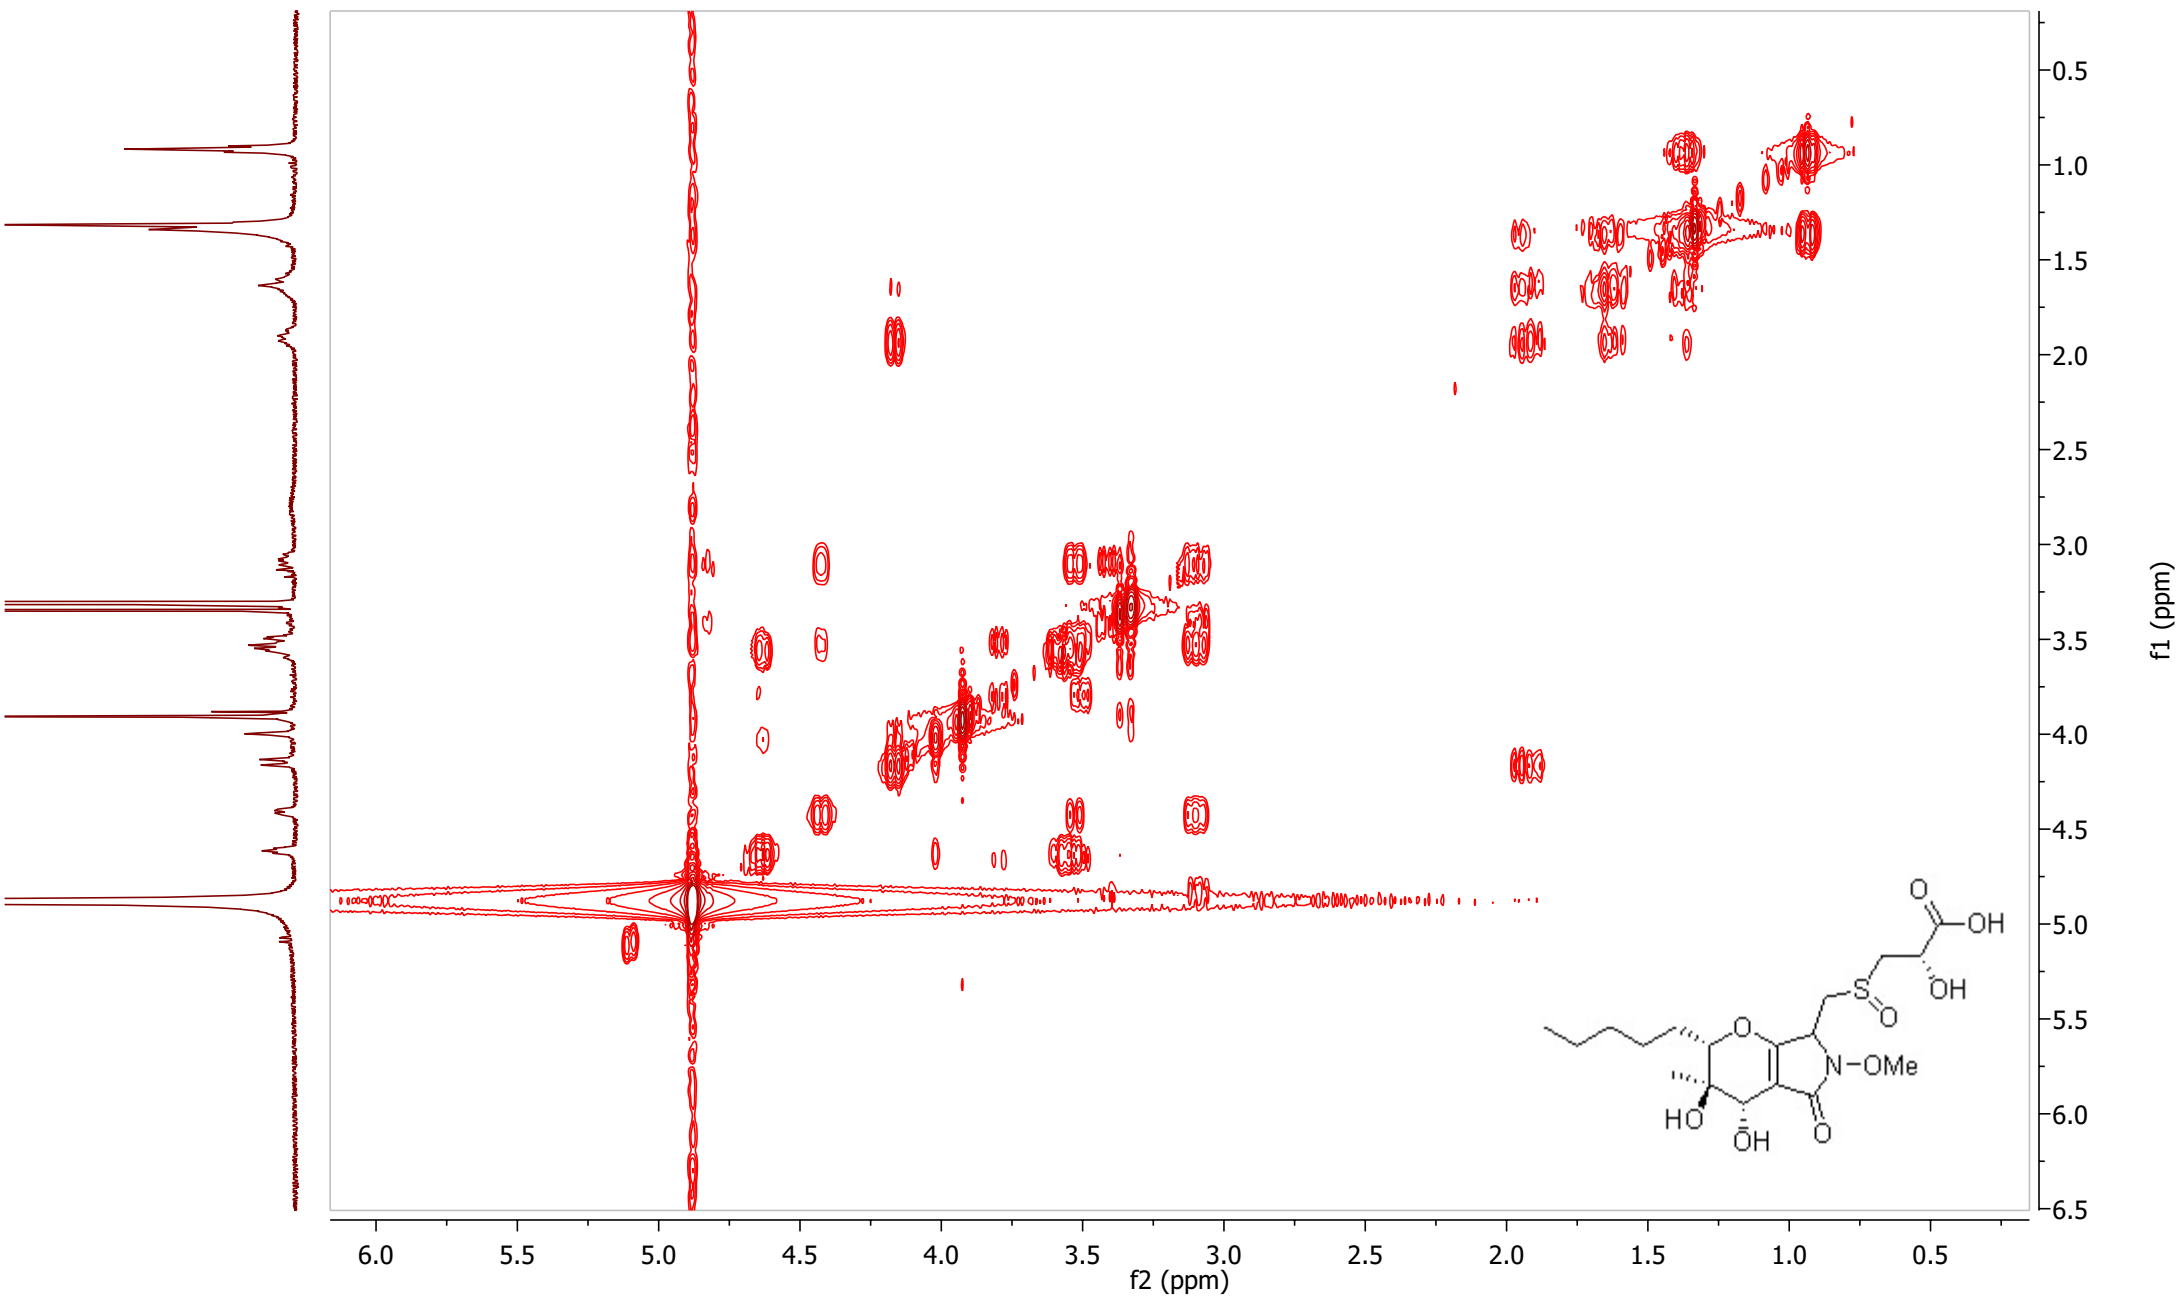

# HSQC NMR spectrum of compound 3

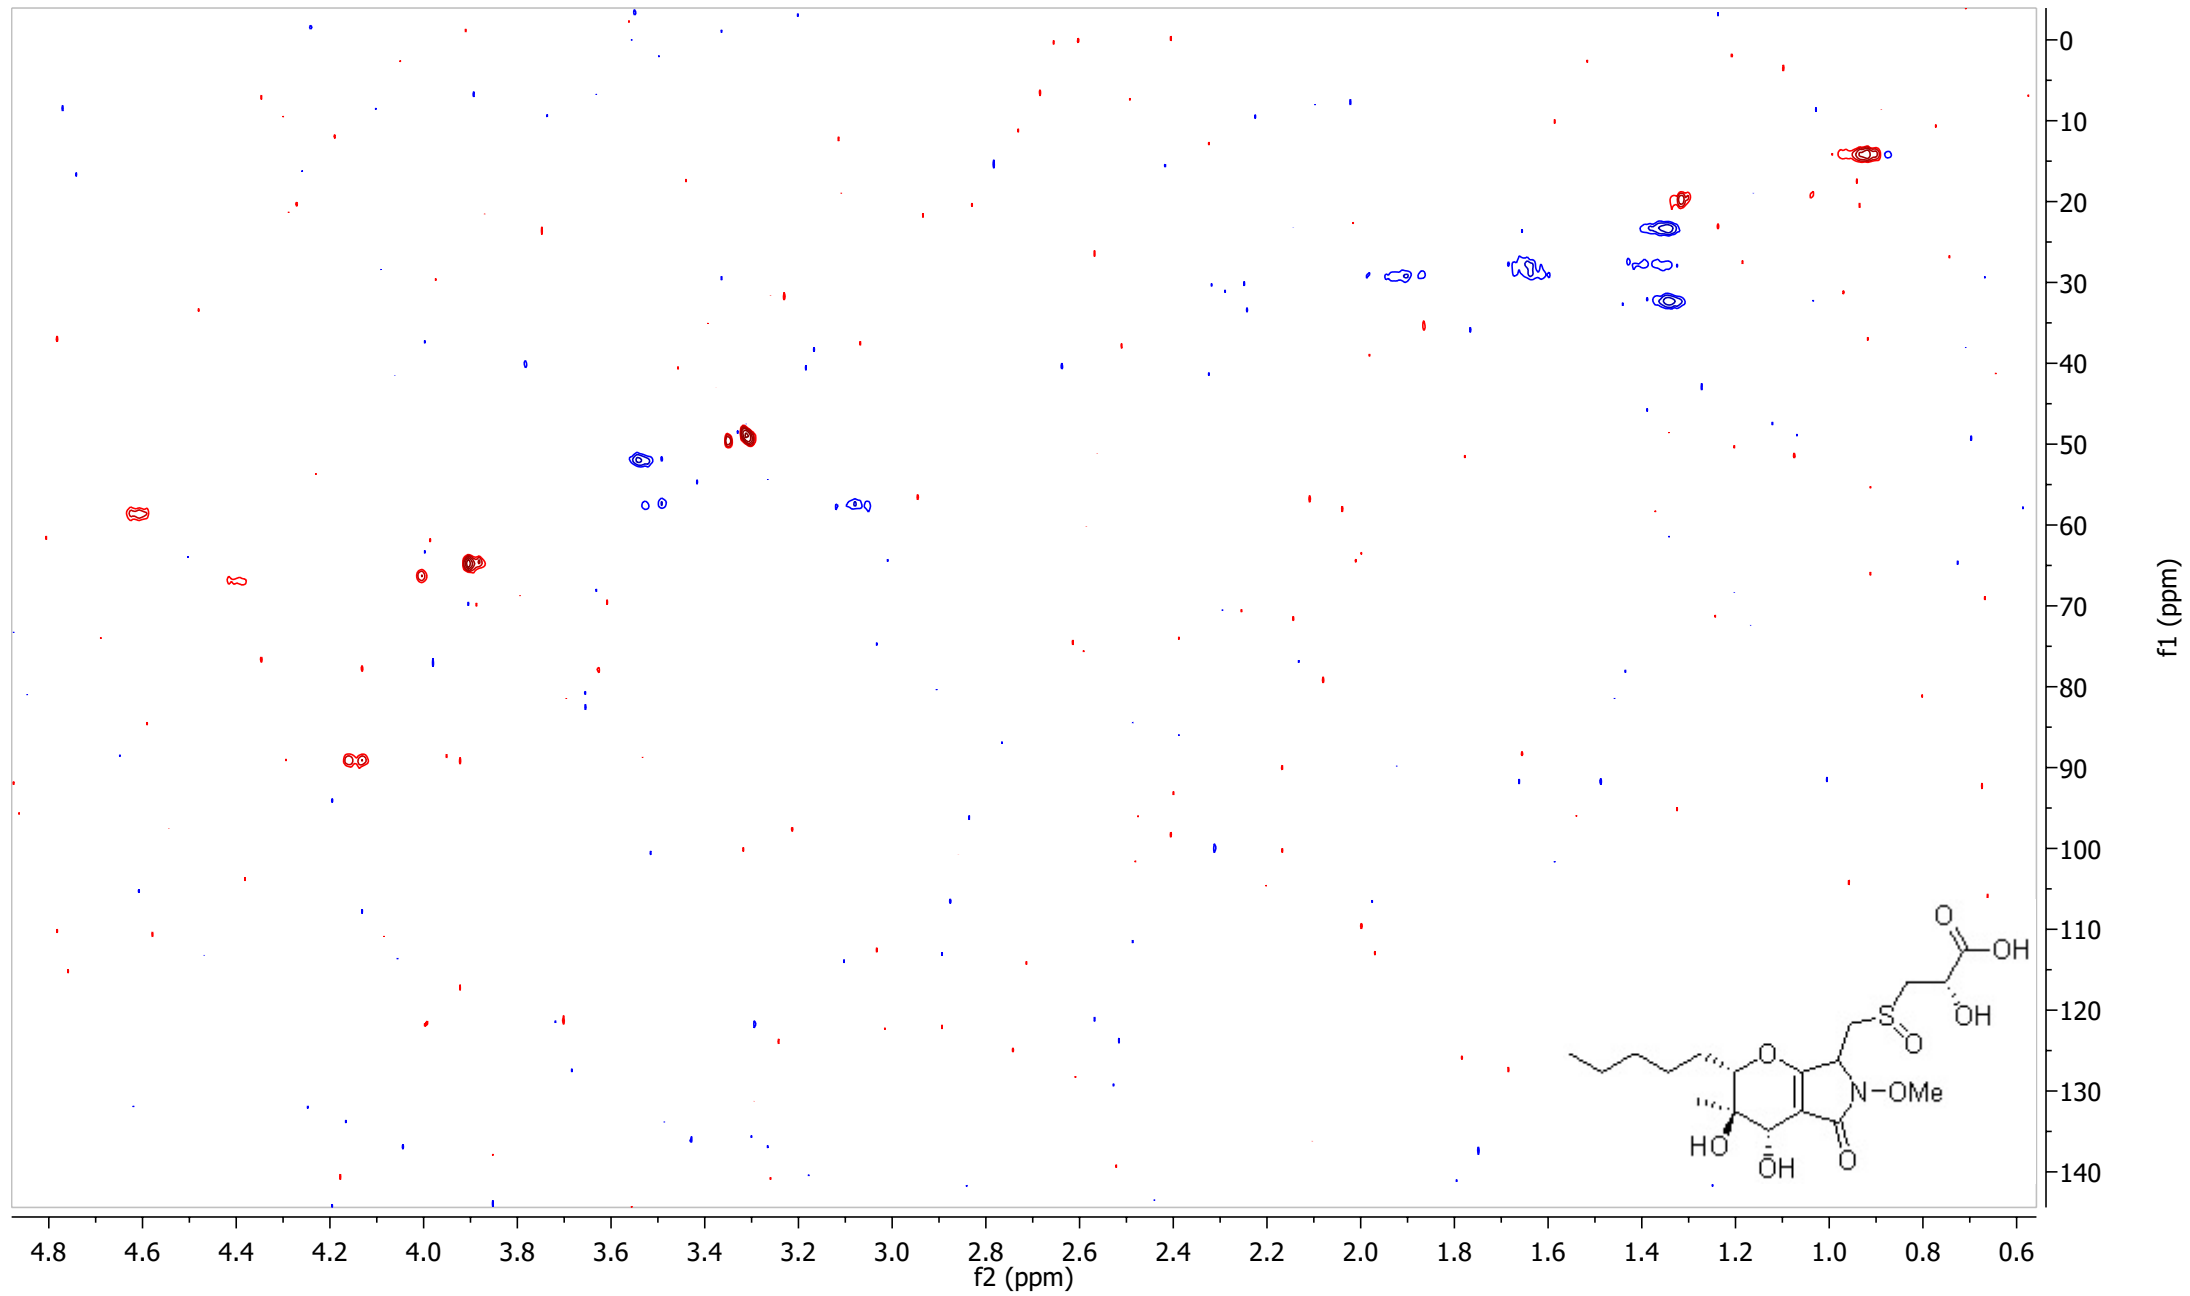



# HMBC NMR spectrum of compound 3

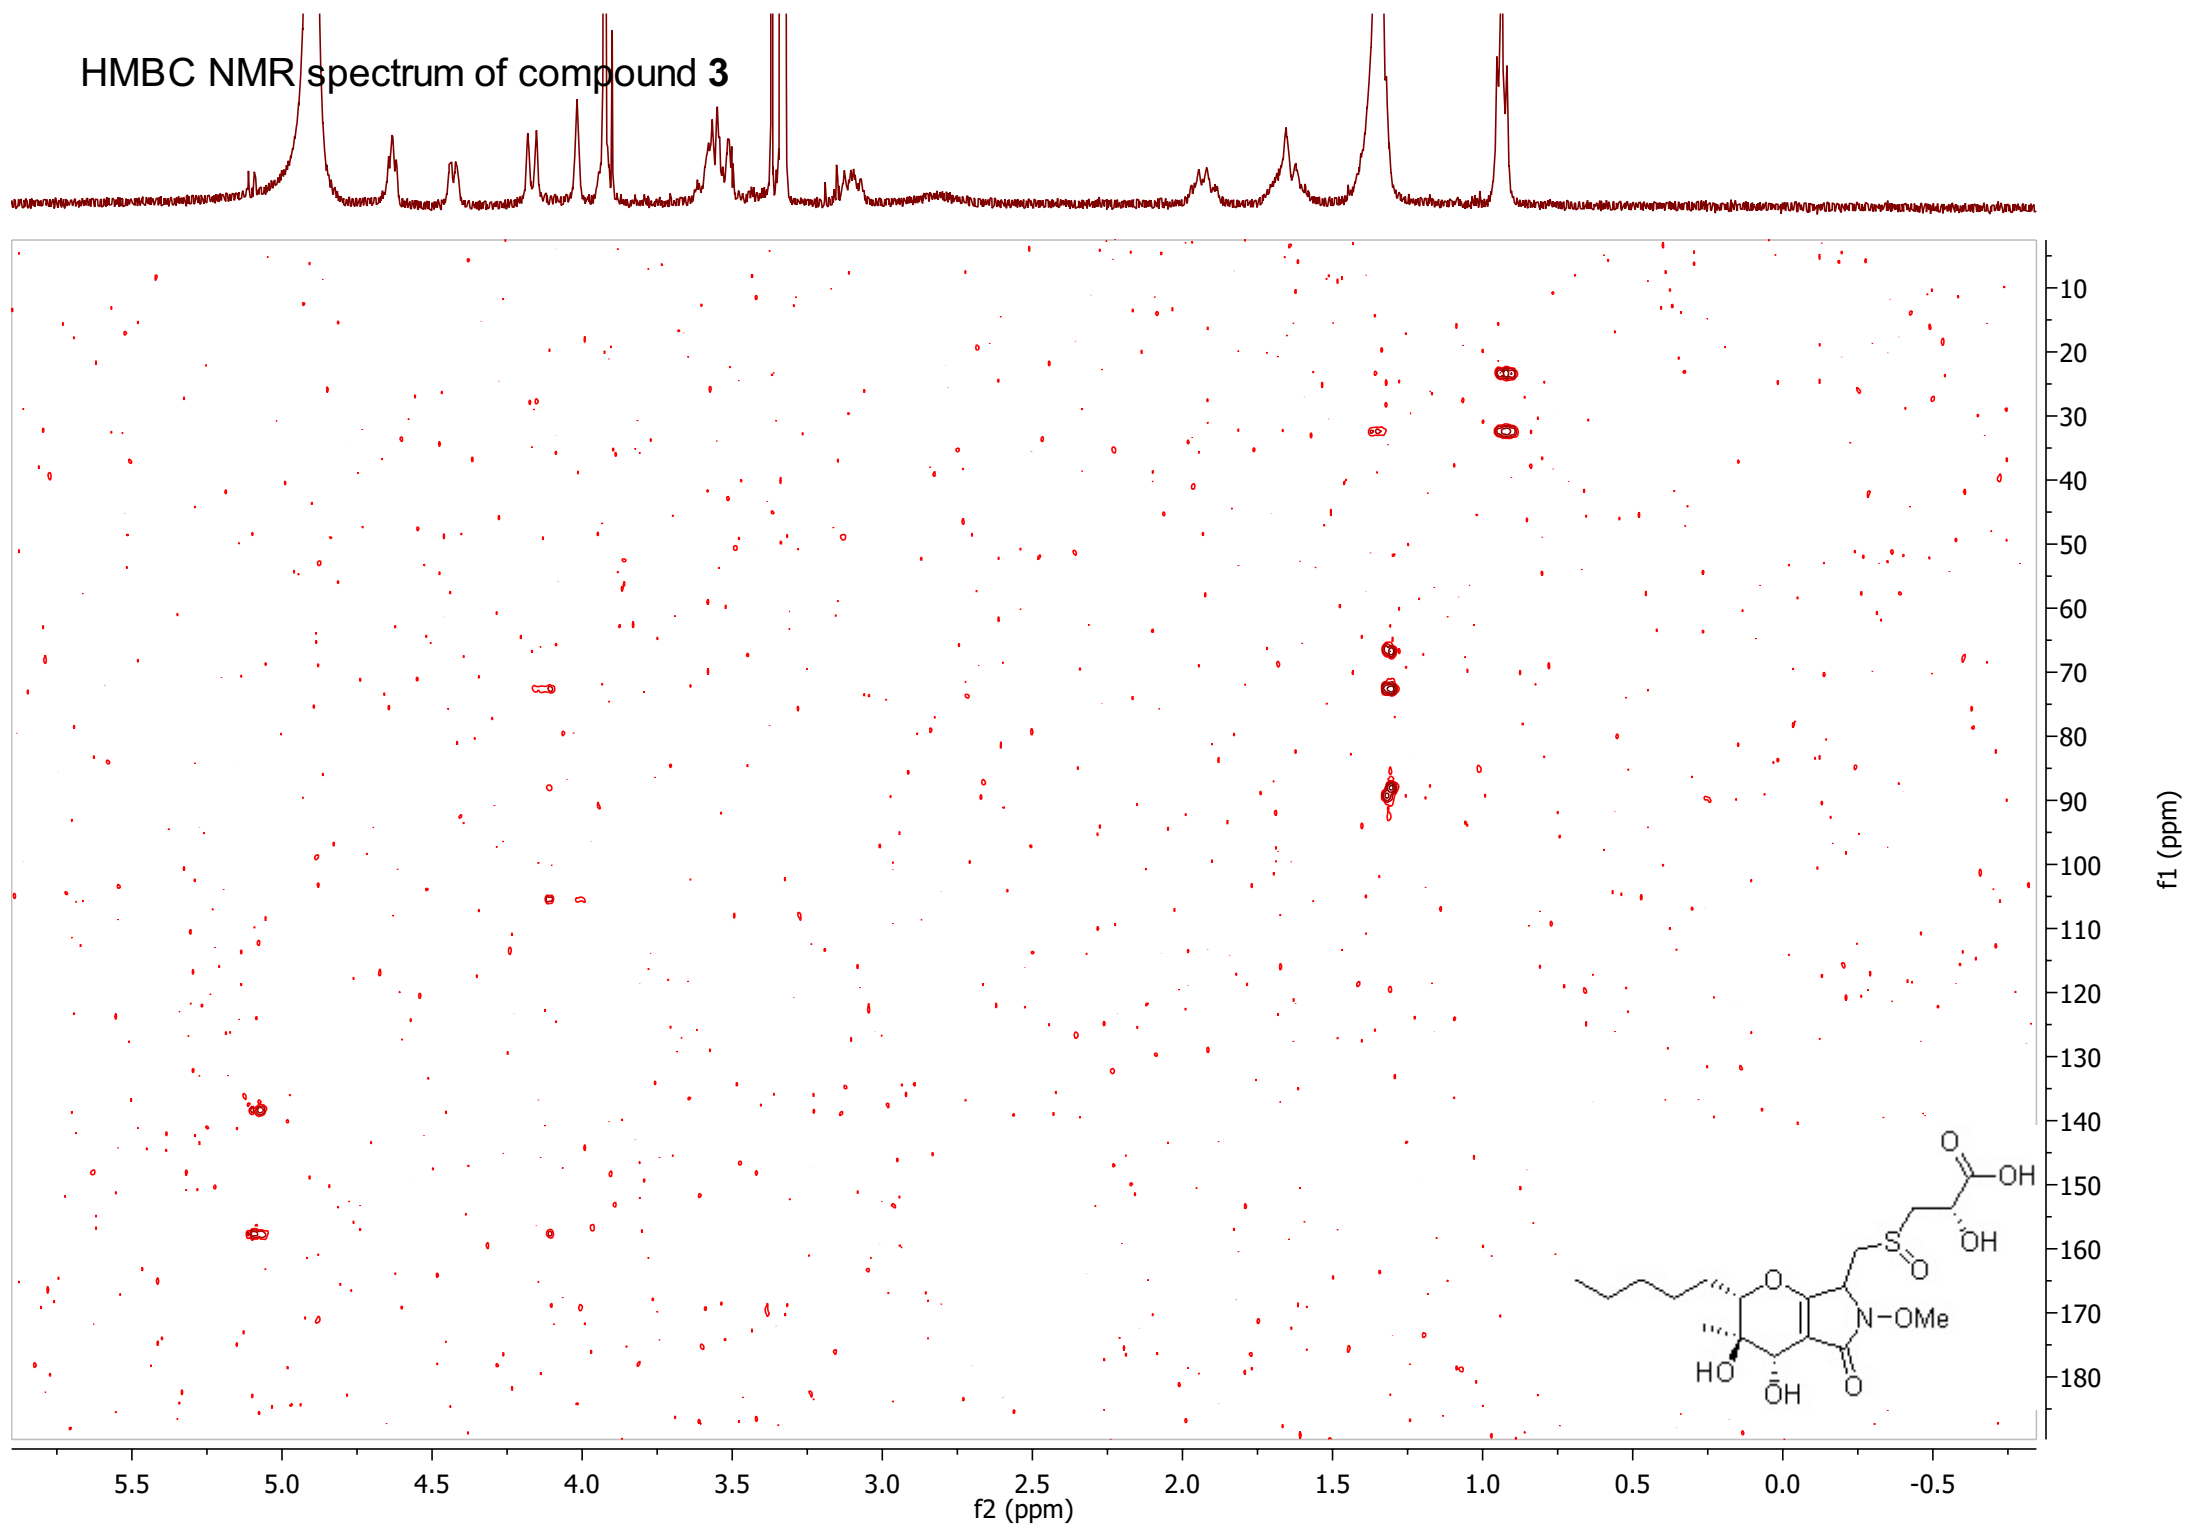

<sup>1</sup>H NMR spectrum of compound **4** (400 MHz in methanol-d<sub>4</sub>)

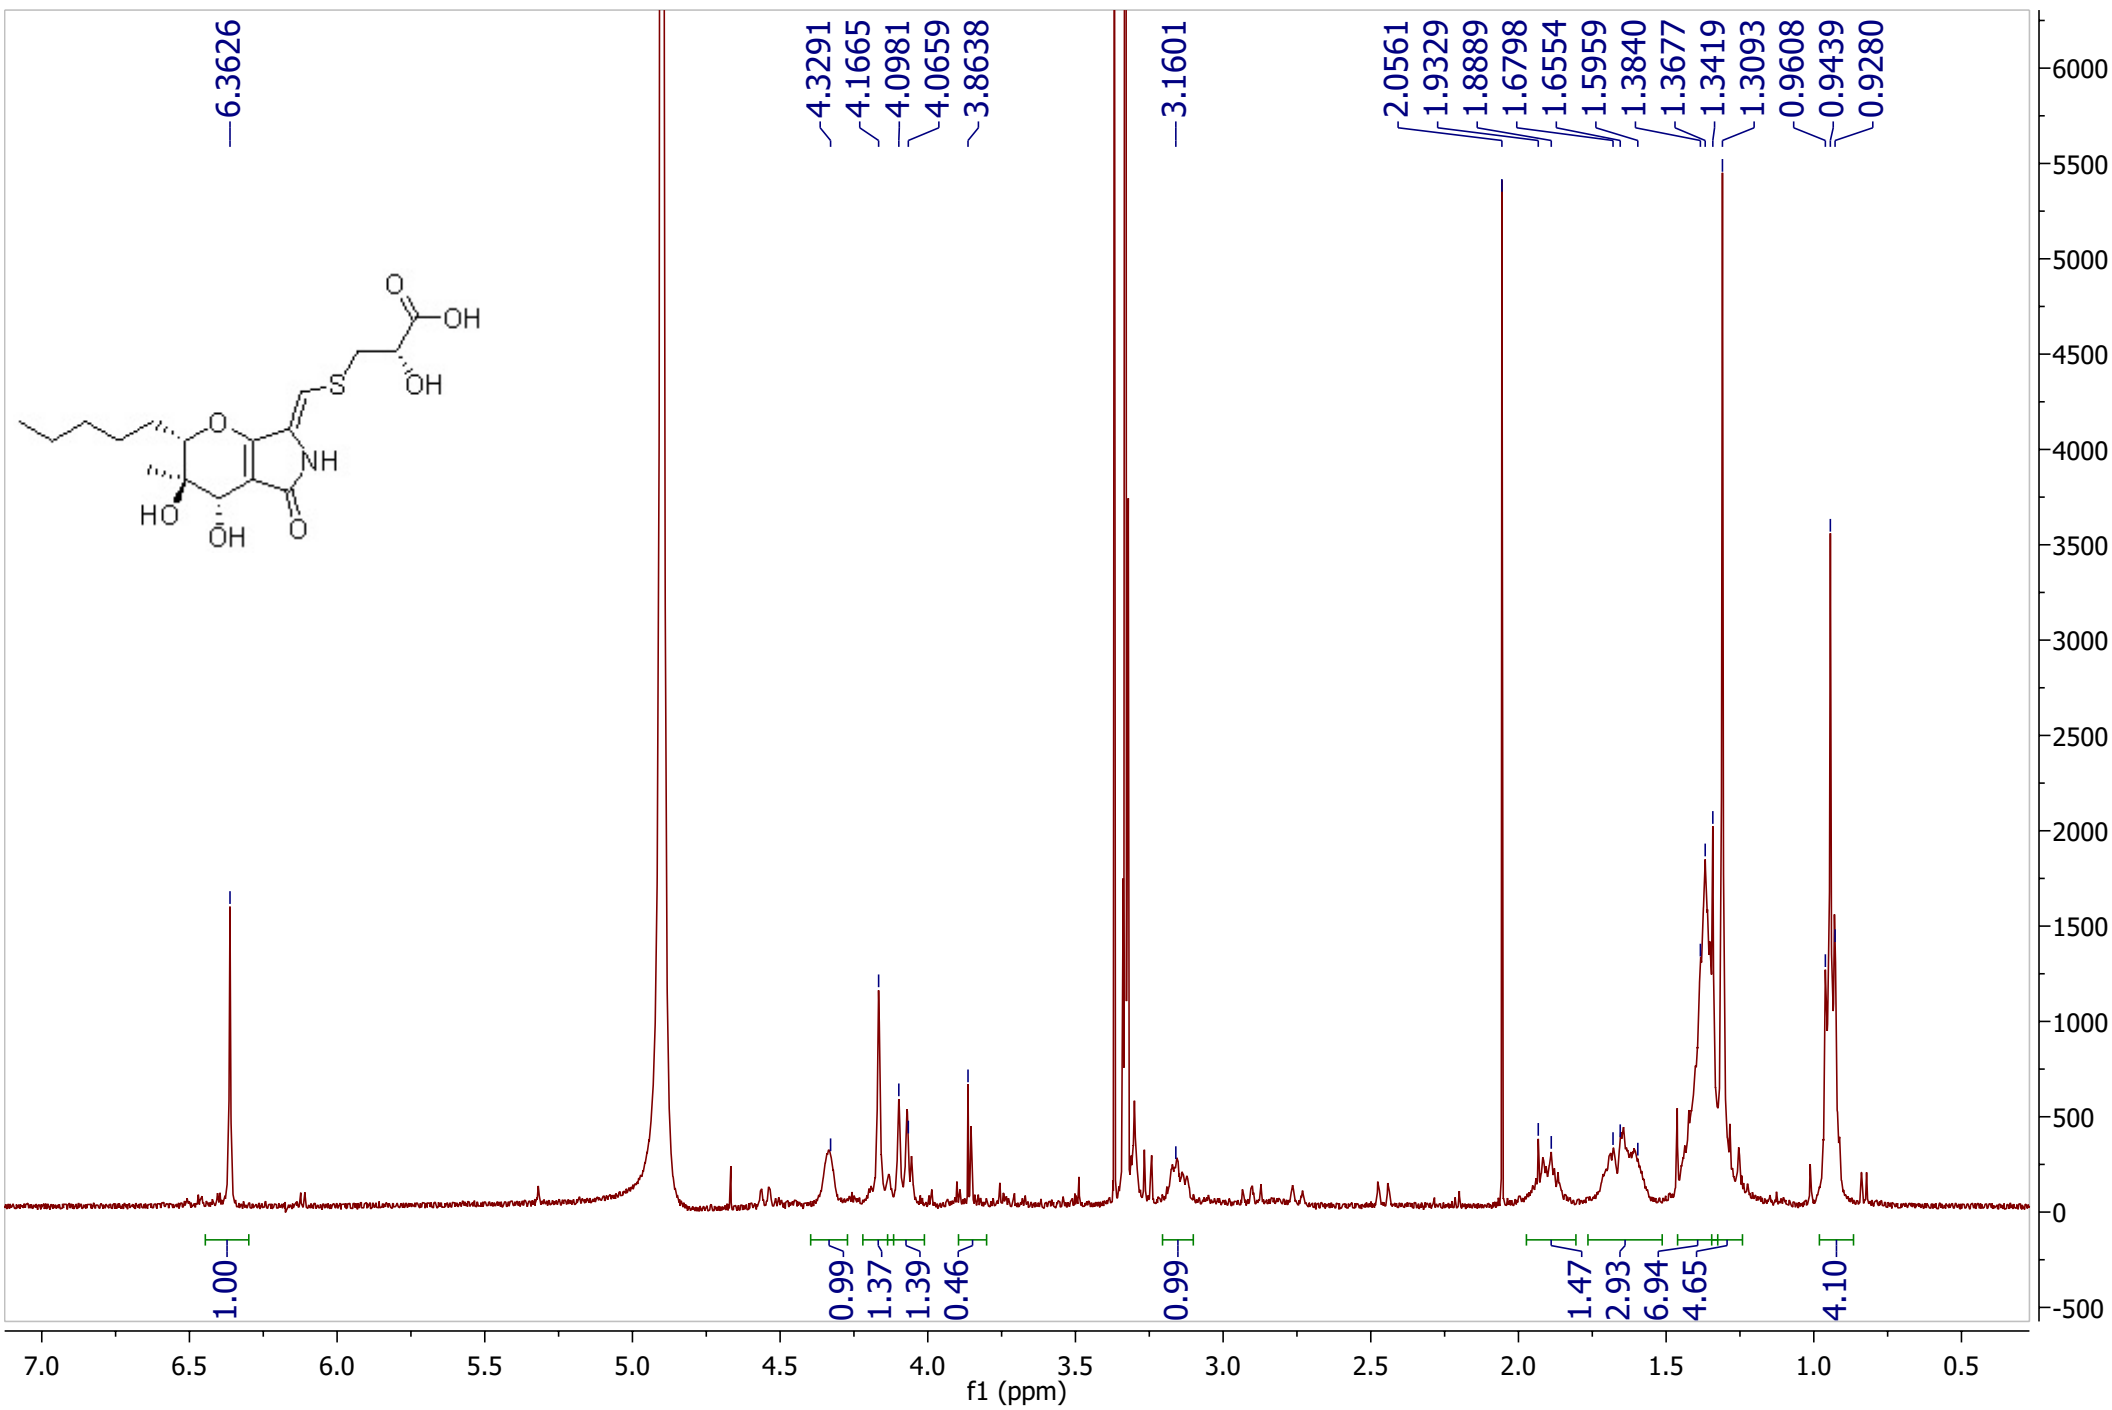

<sup>13</sup>C NMR spectrum of compound **4**

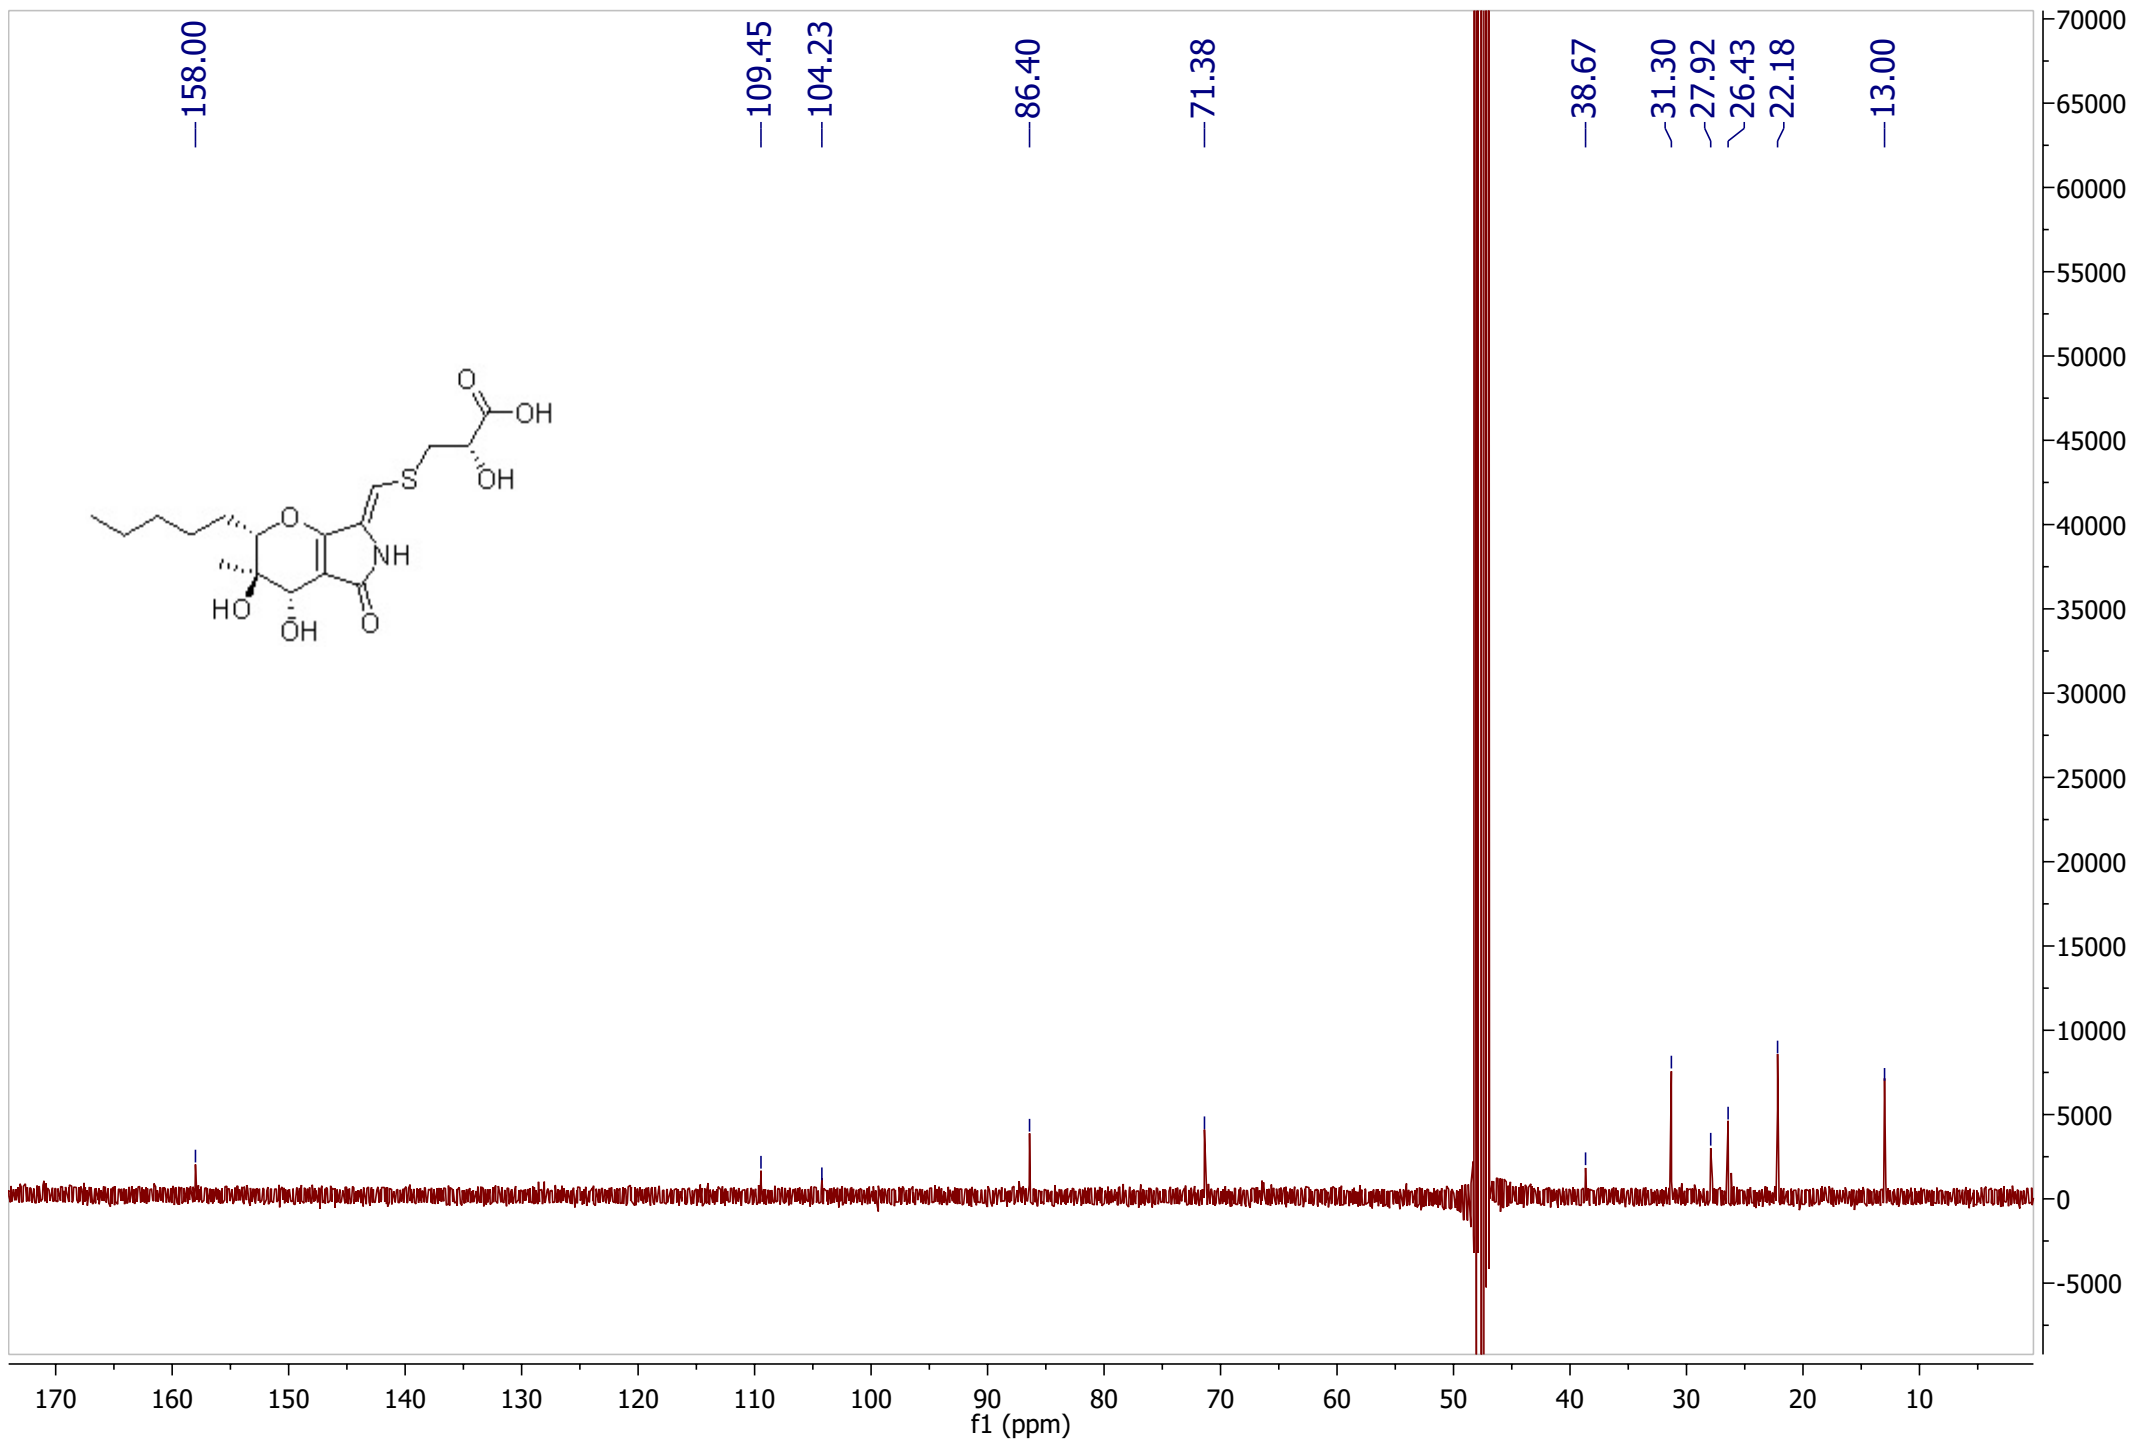

$^1\text{H}$ - $^1\text{H}$  COSY of compound **4**

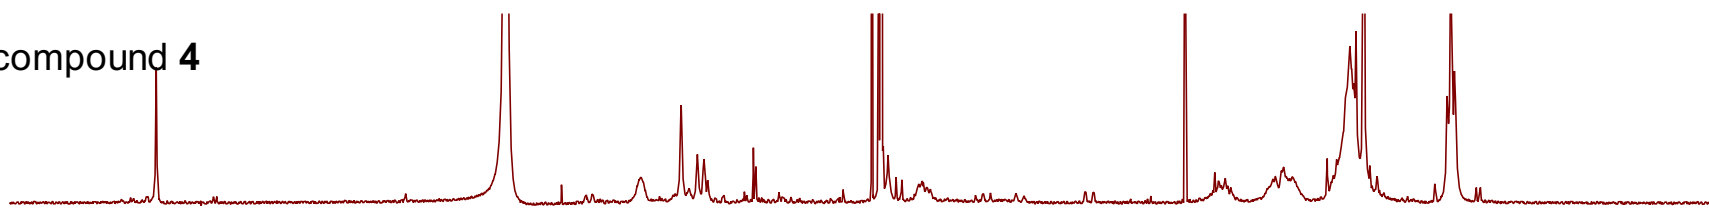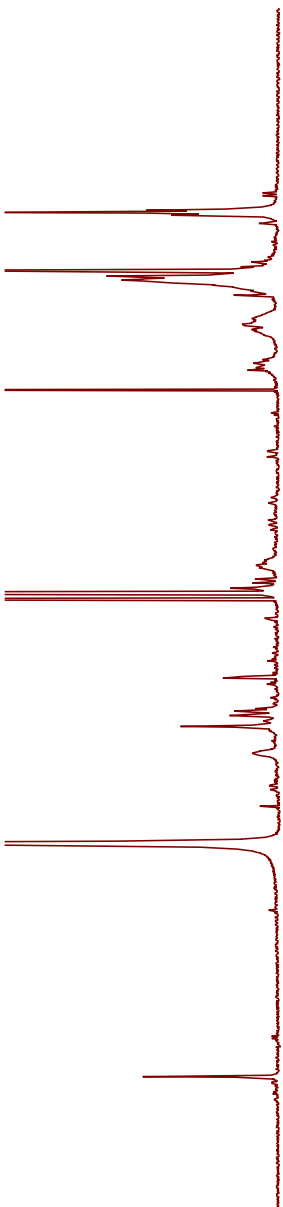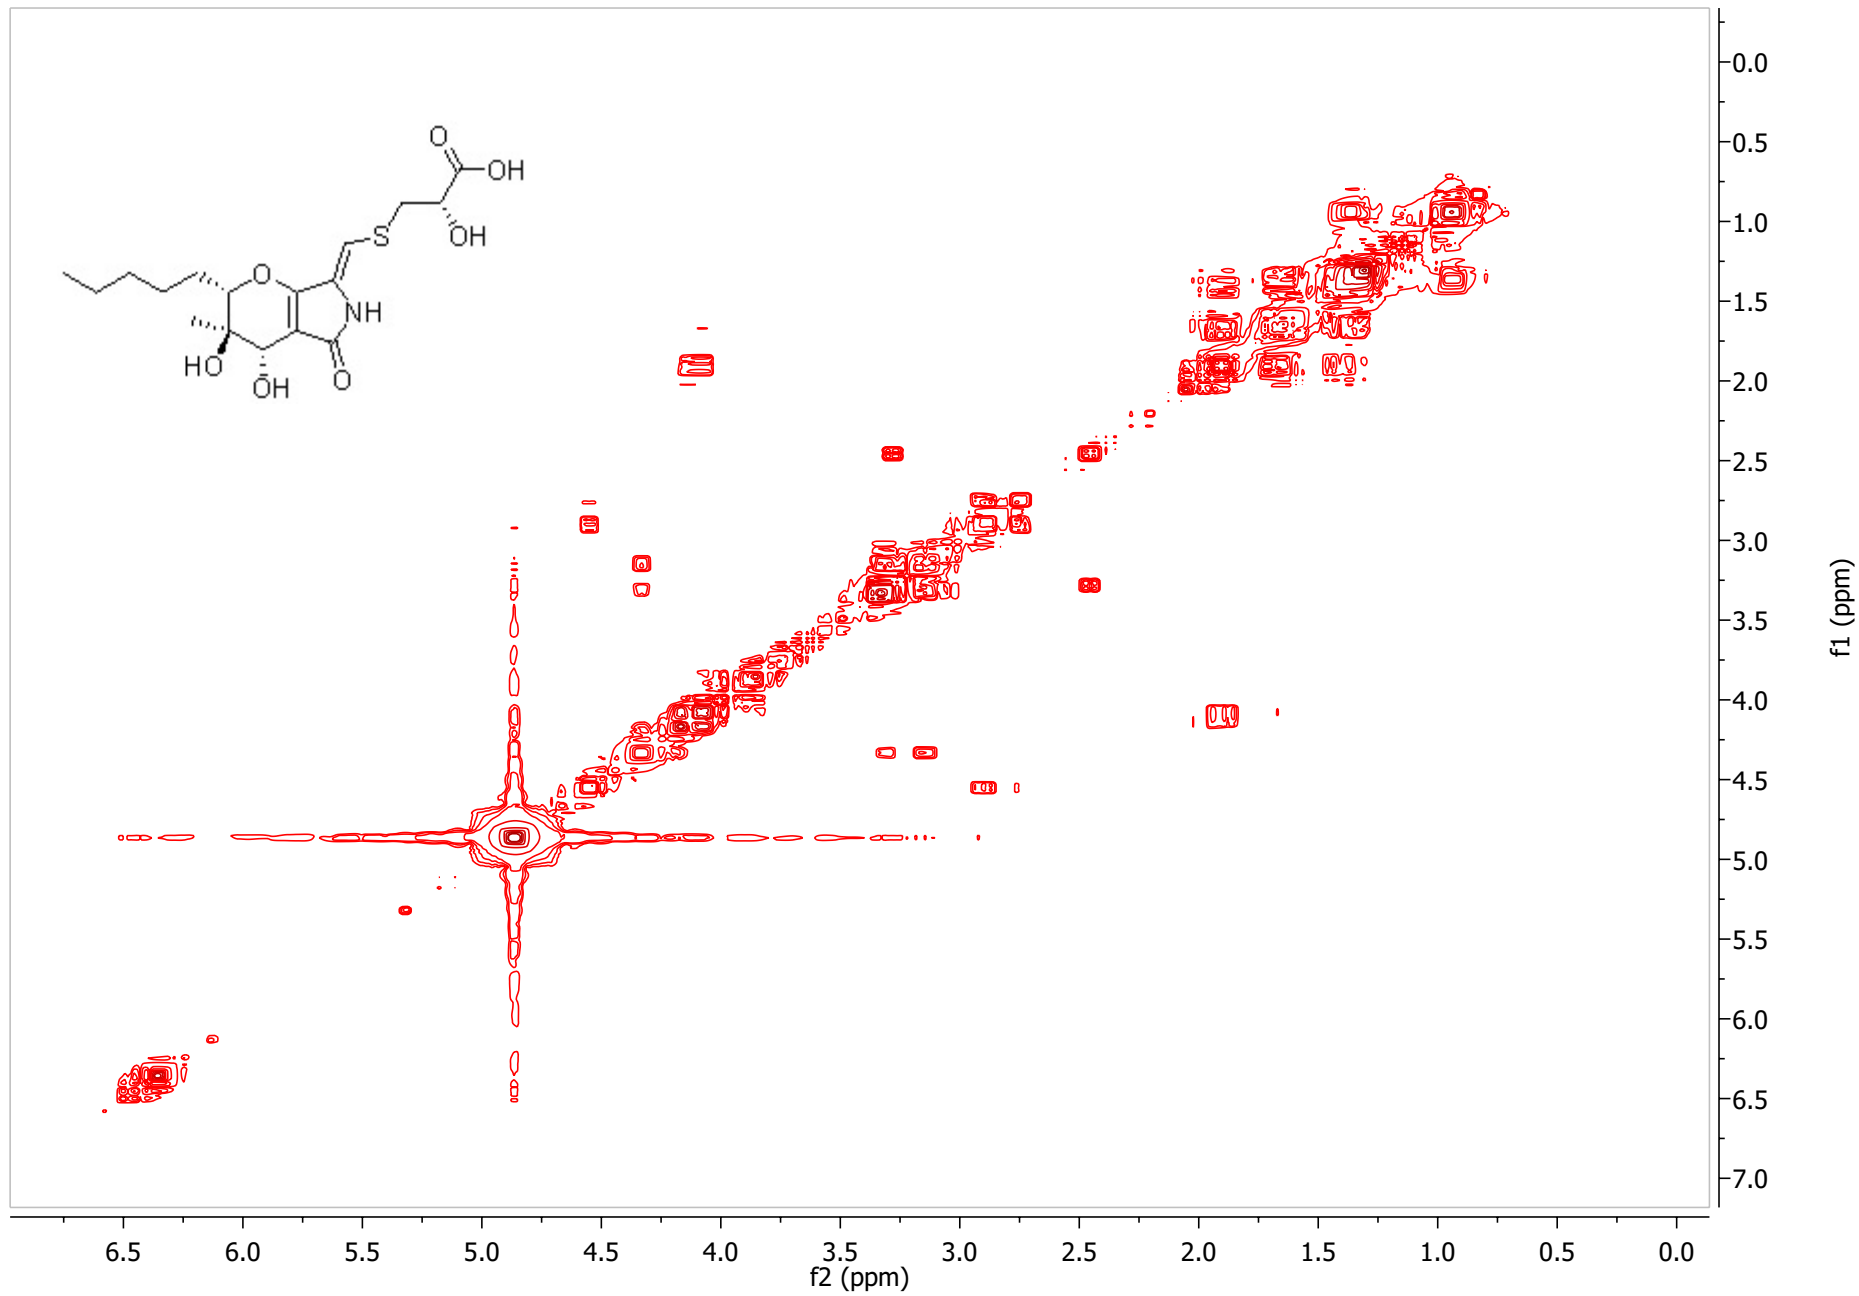

# HSQC NMR spectrum of compound 4

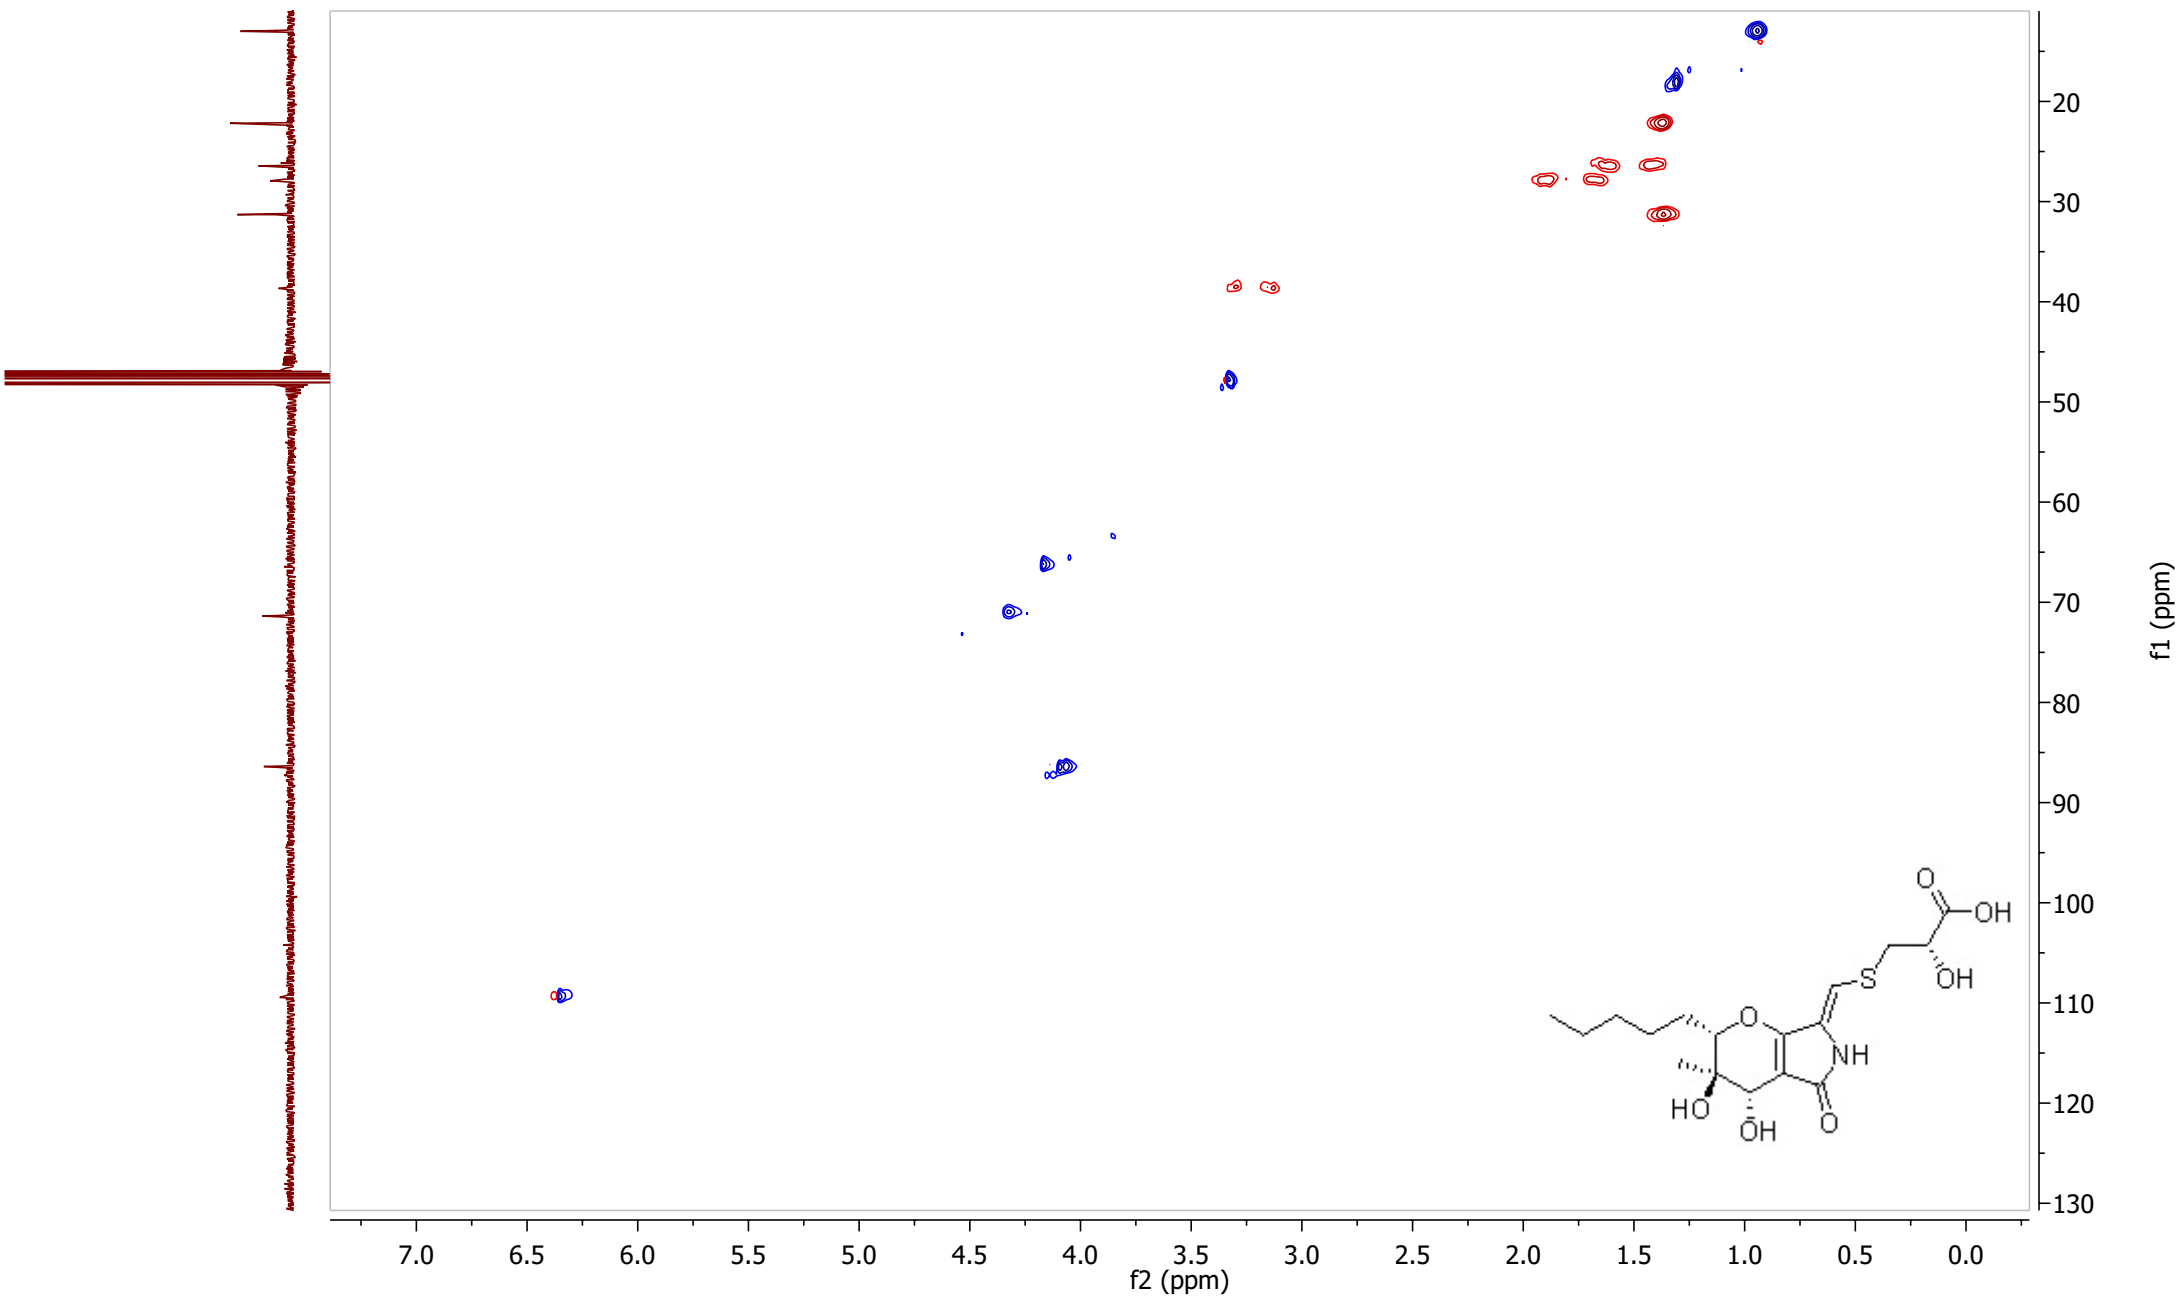

HMBC spectrum of compound 4

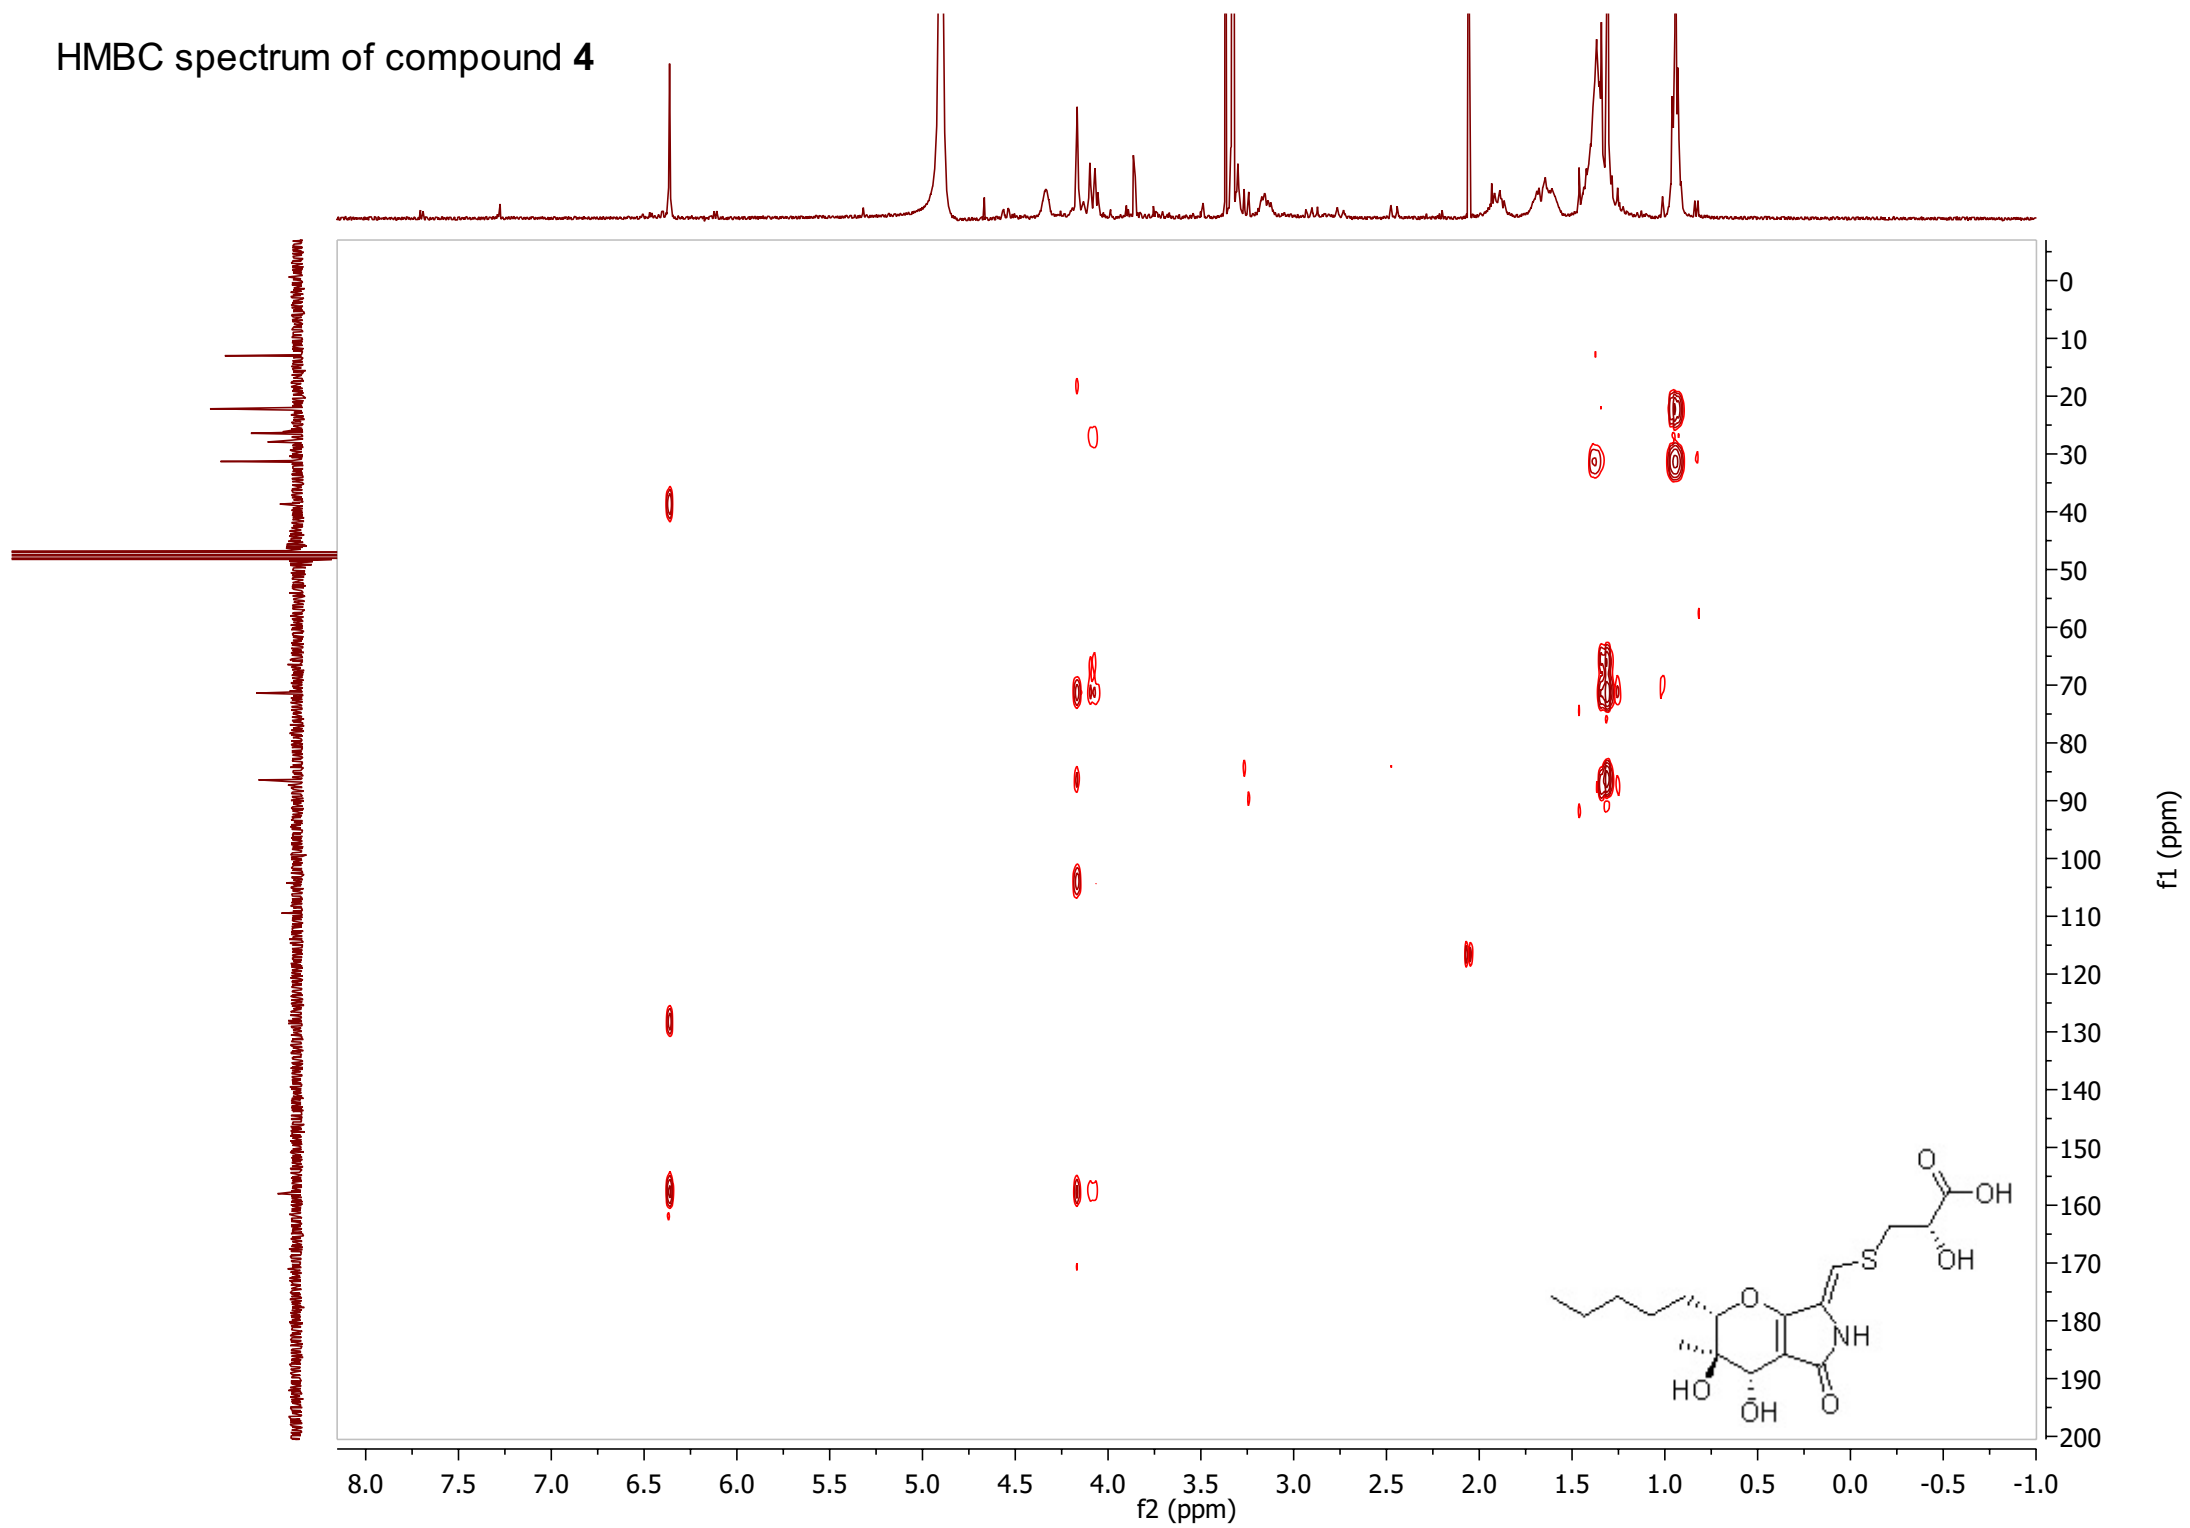

<sup>1</sup>H NMR spectrum of compound **5** (400 MHz in methanol-*d*<sub>4</sub>)

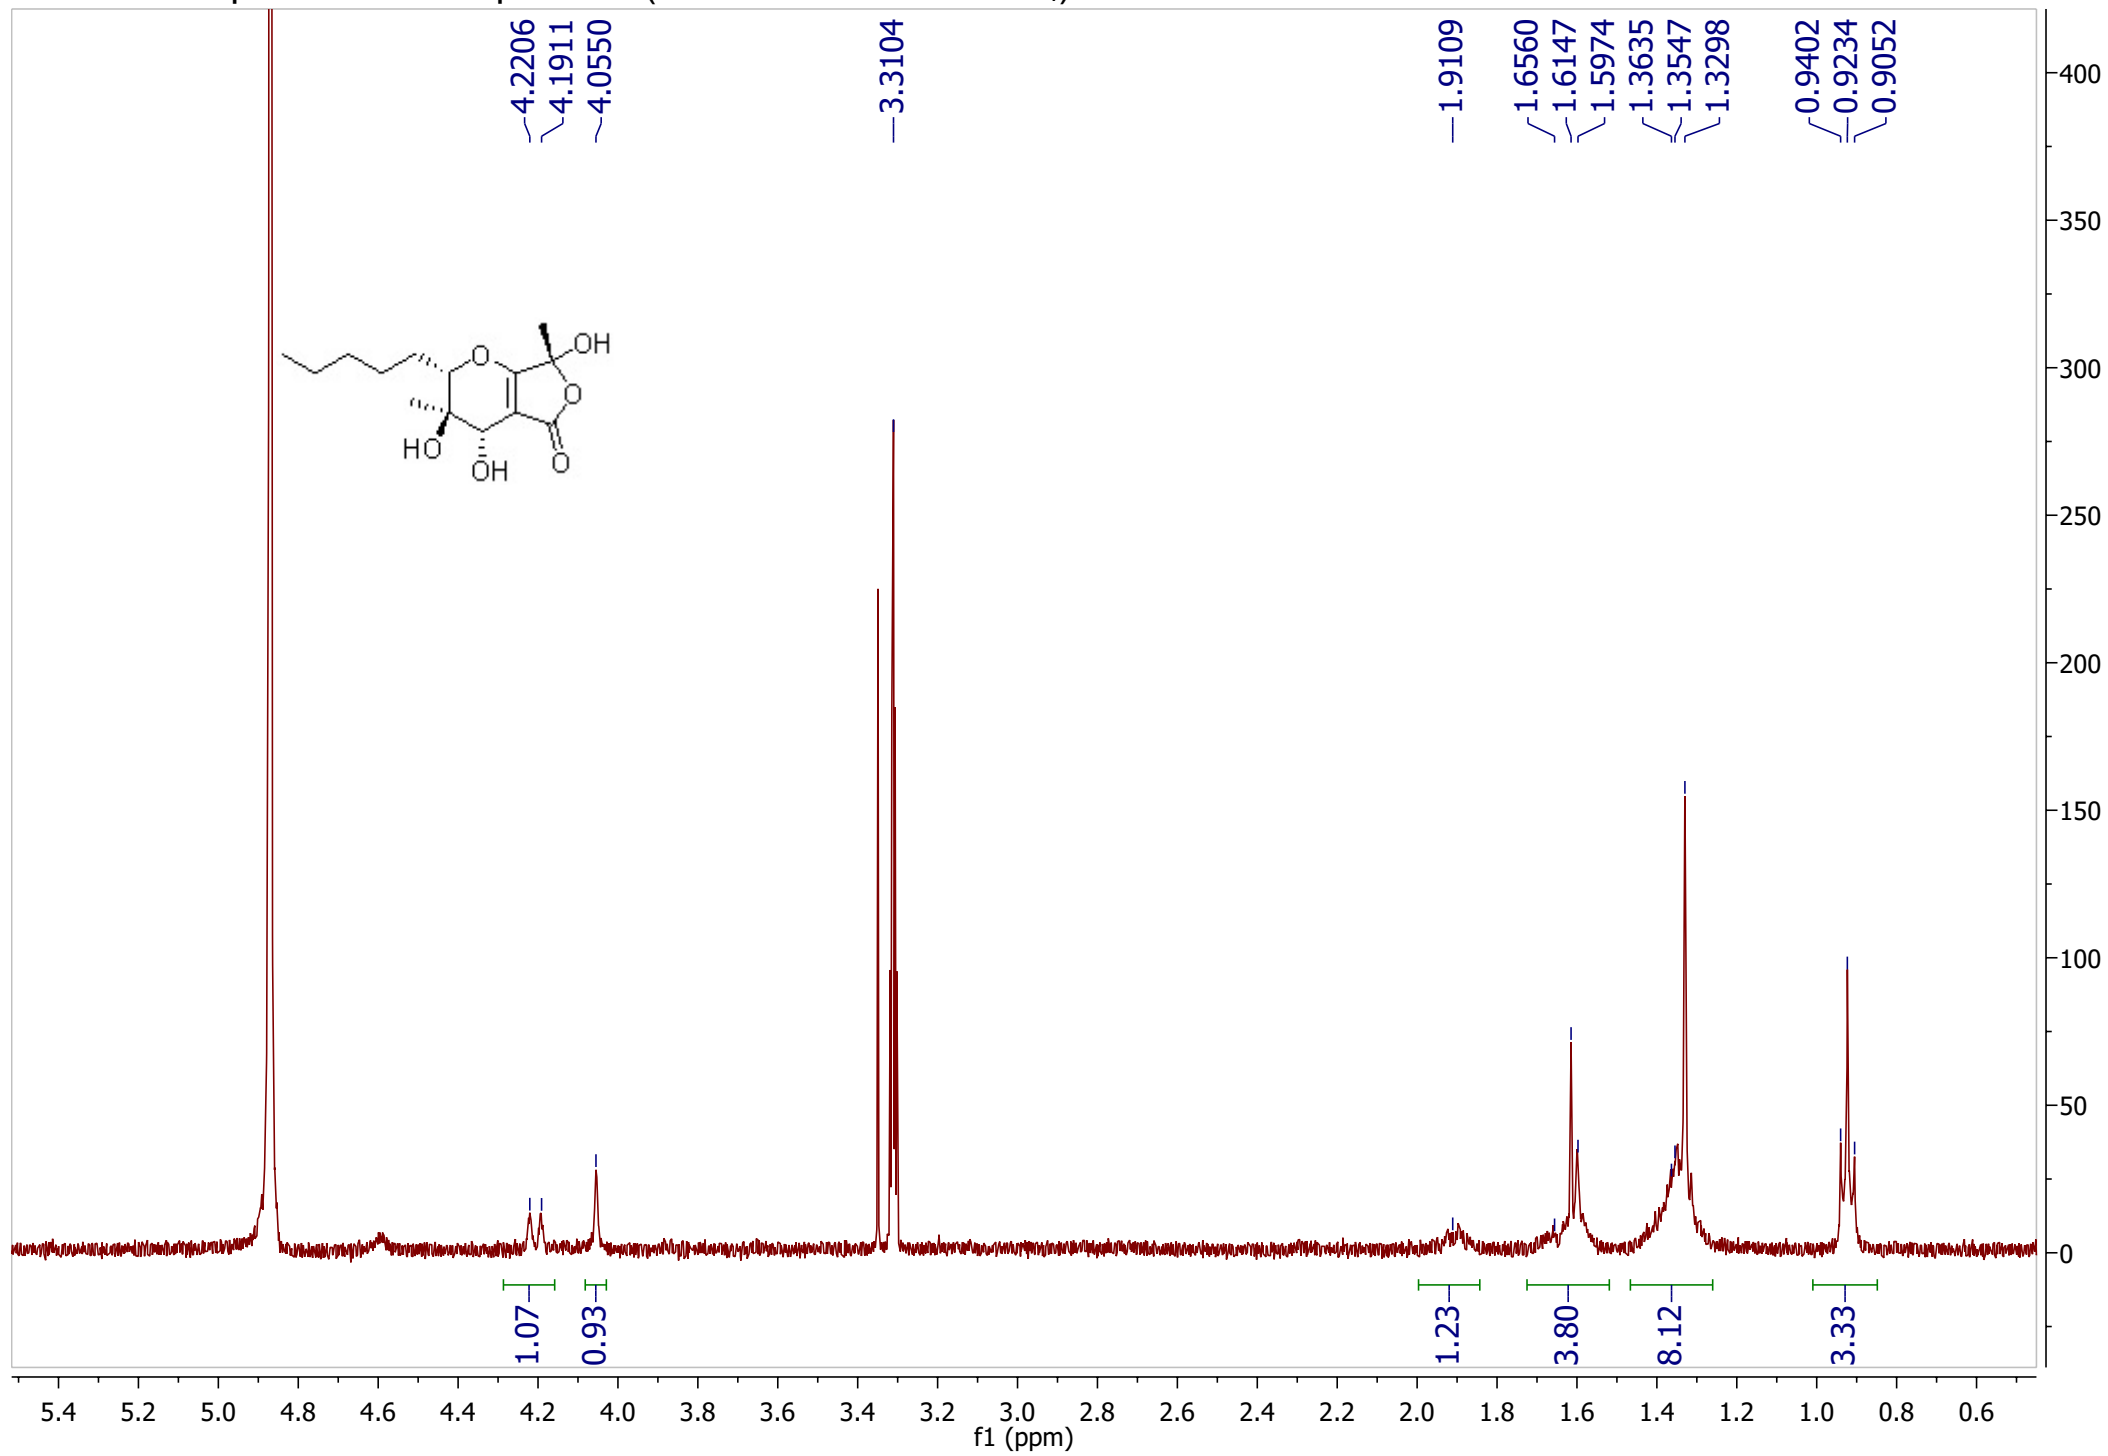

<sup>13</sup>C NMR spectrum of compound **5**

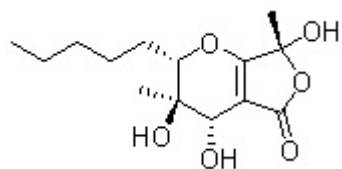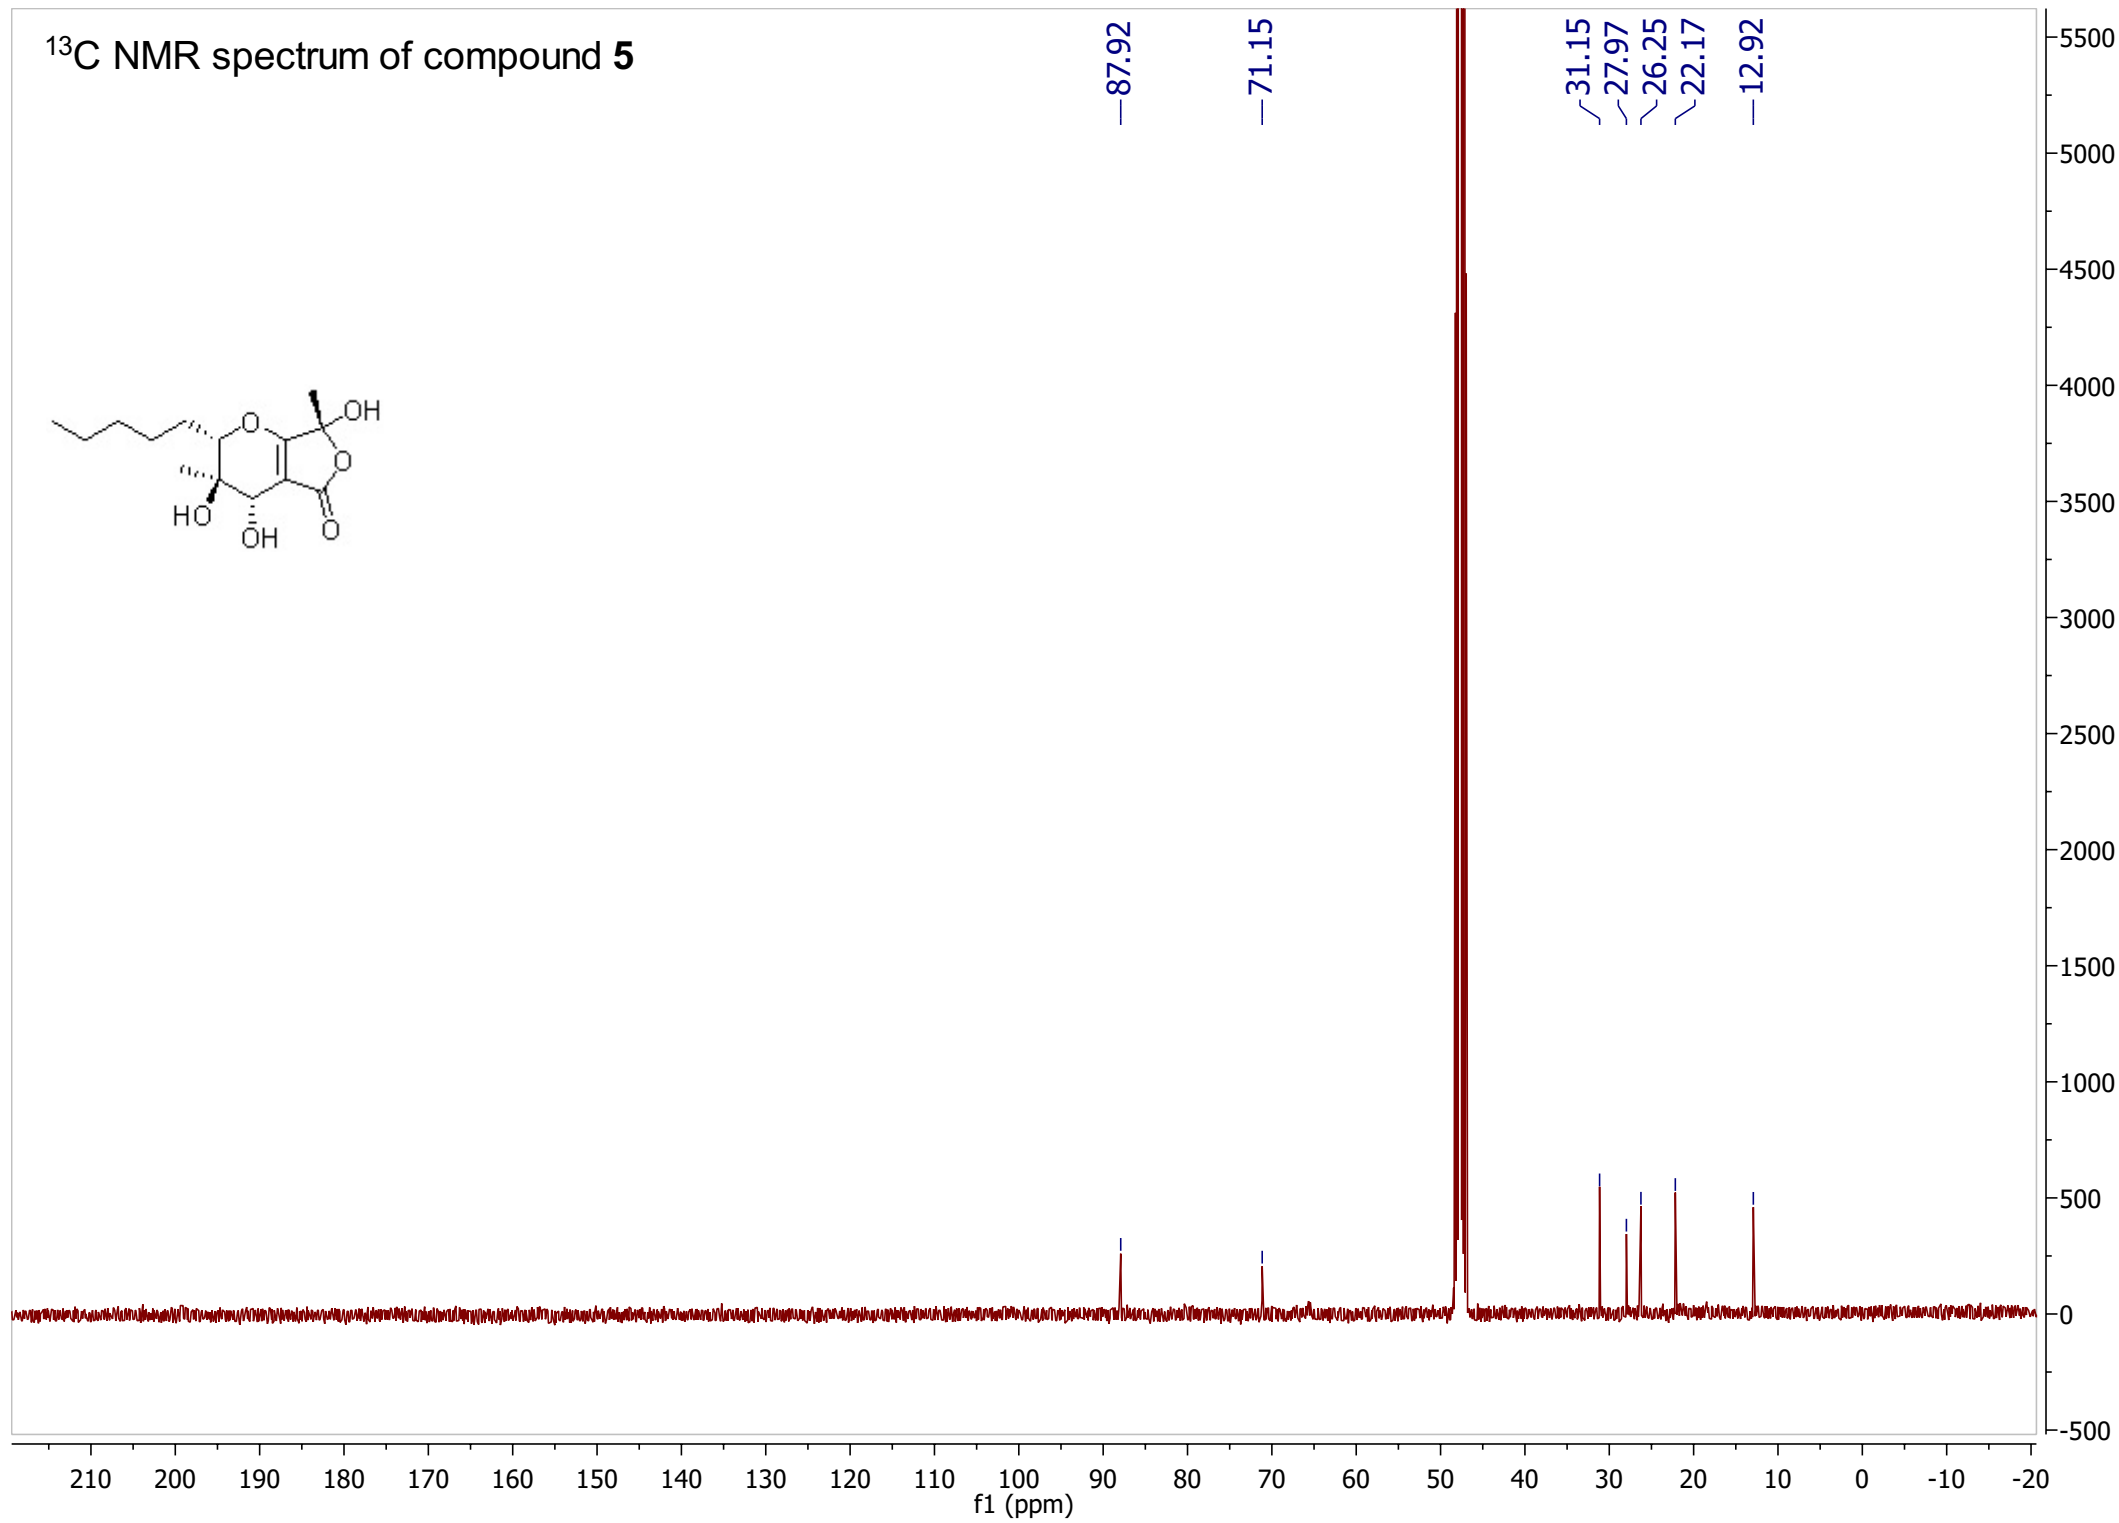



# HSQC spectrum of compound 5

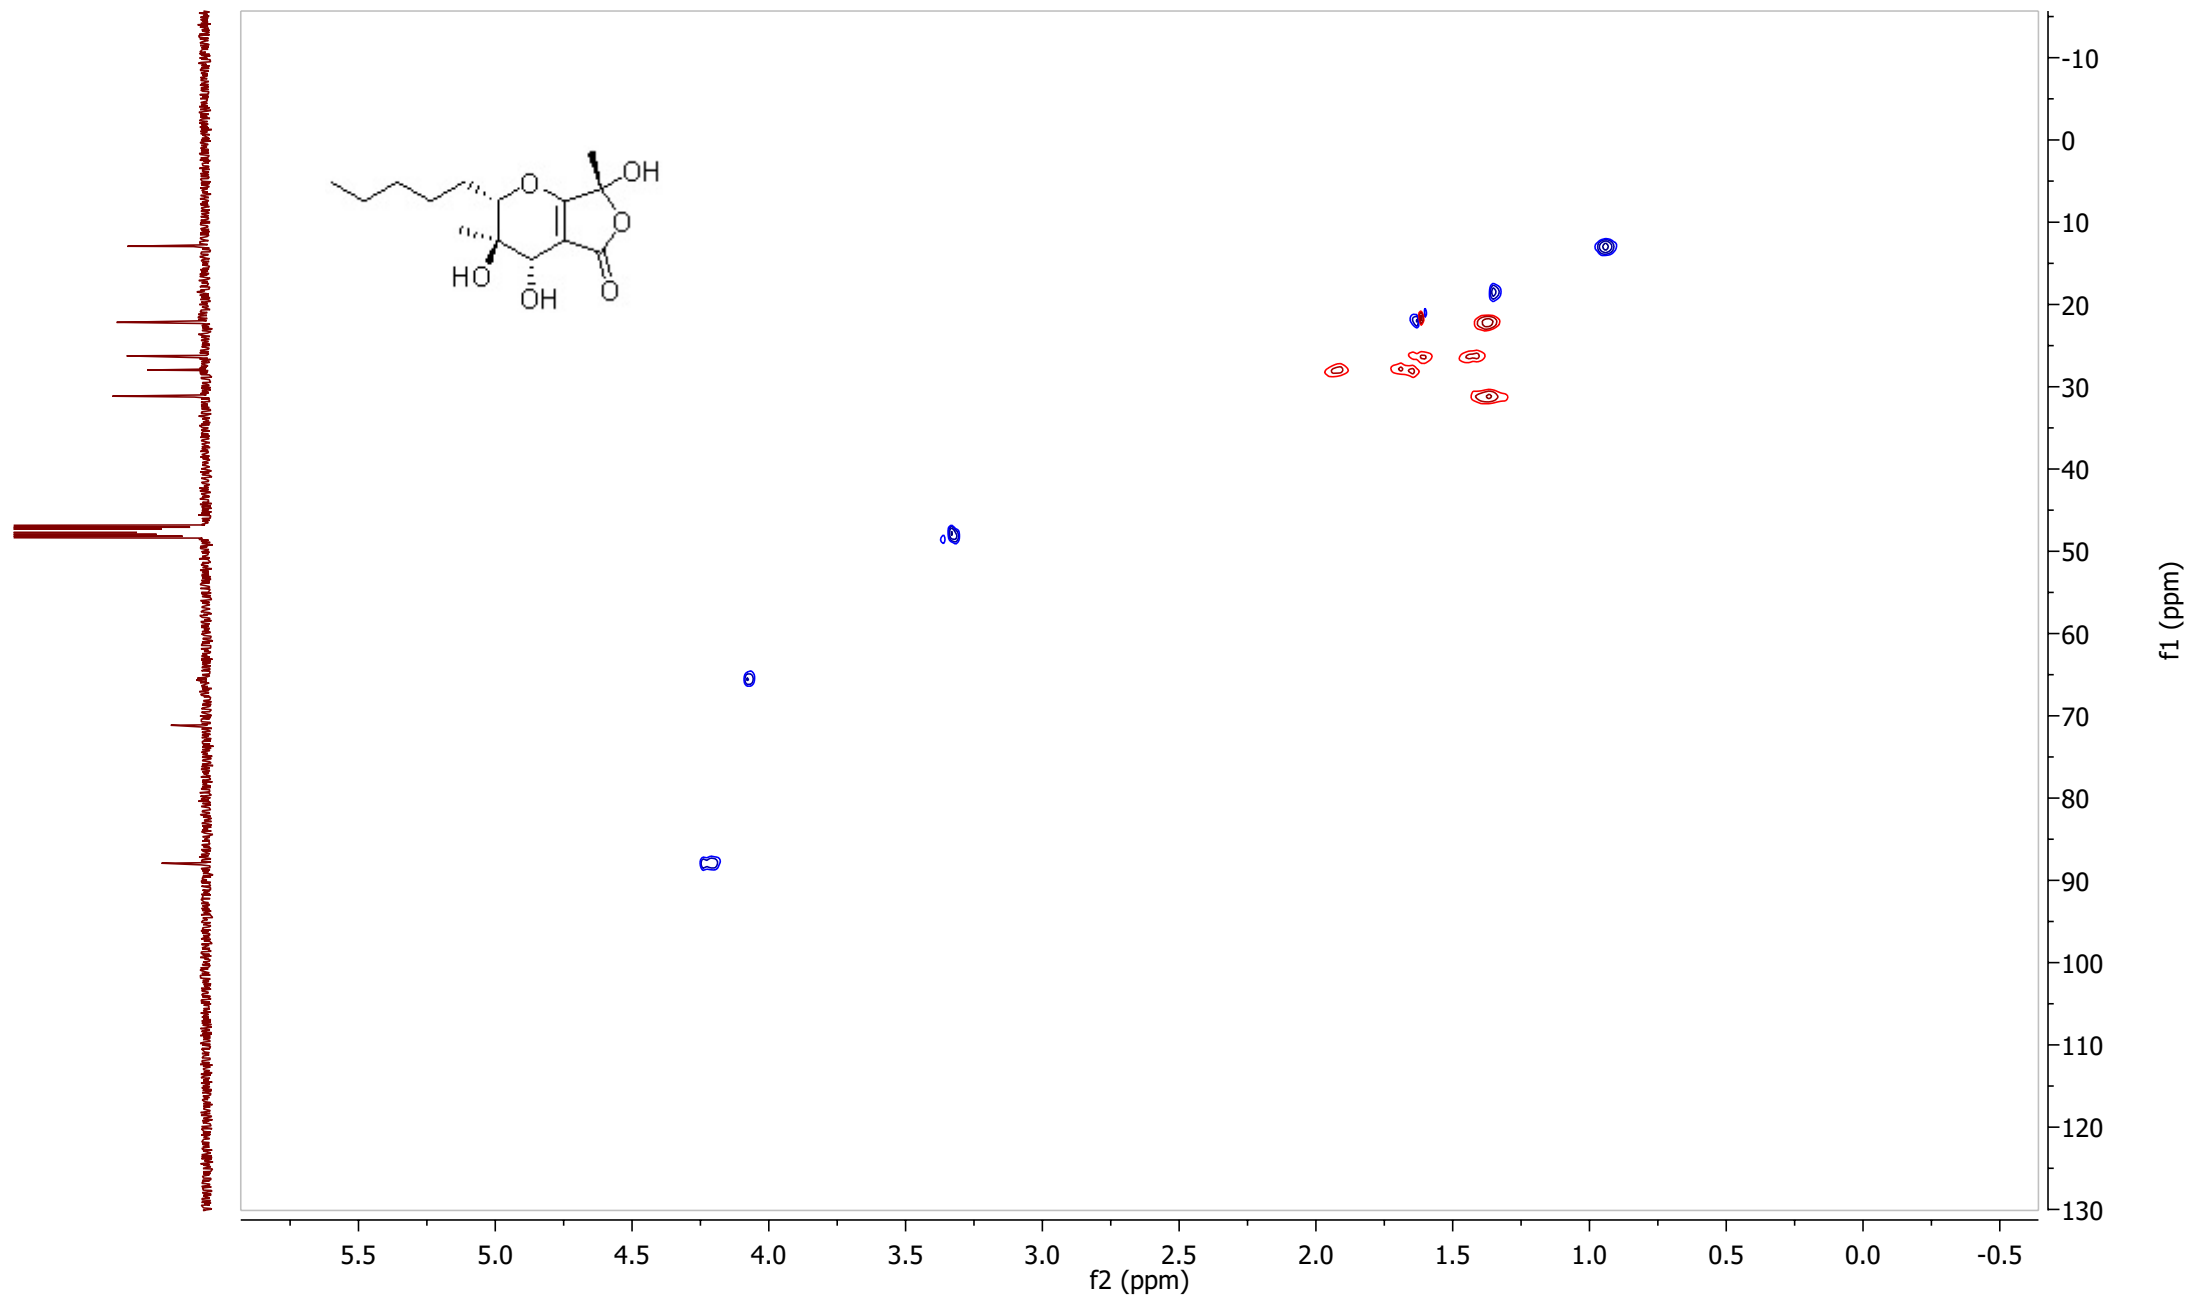

# HMBC spectrum of compound 5

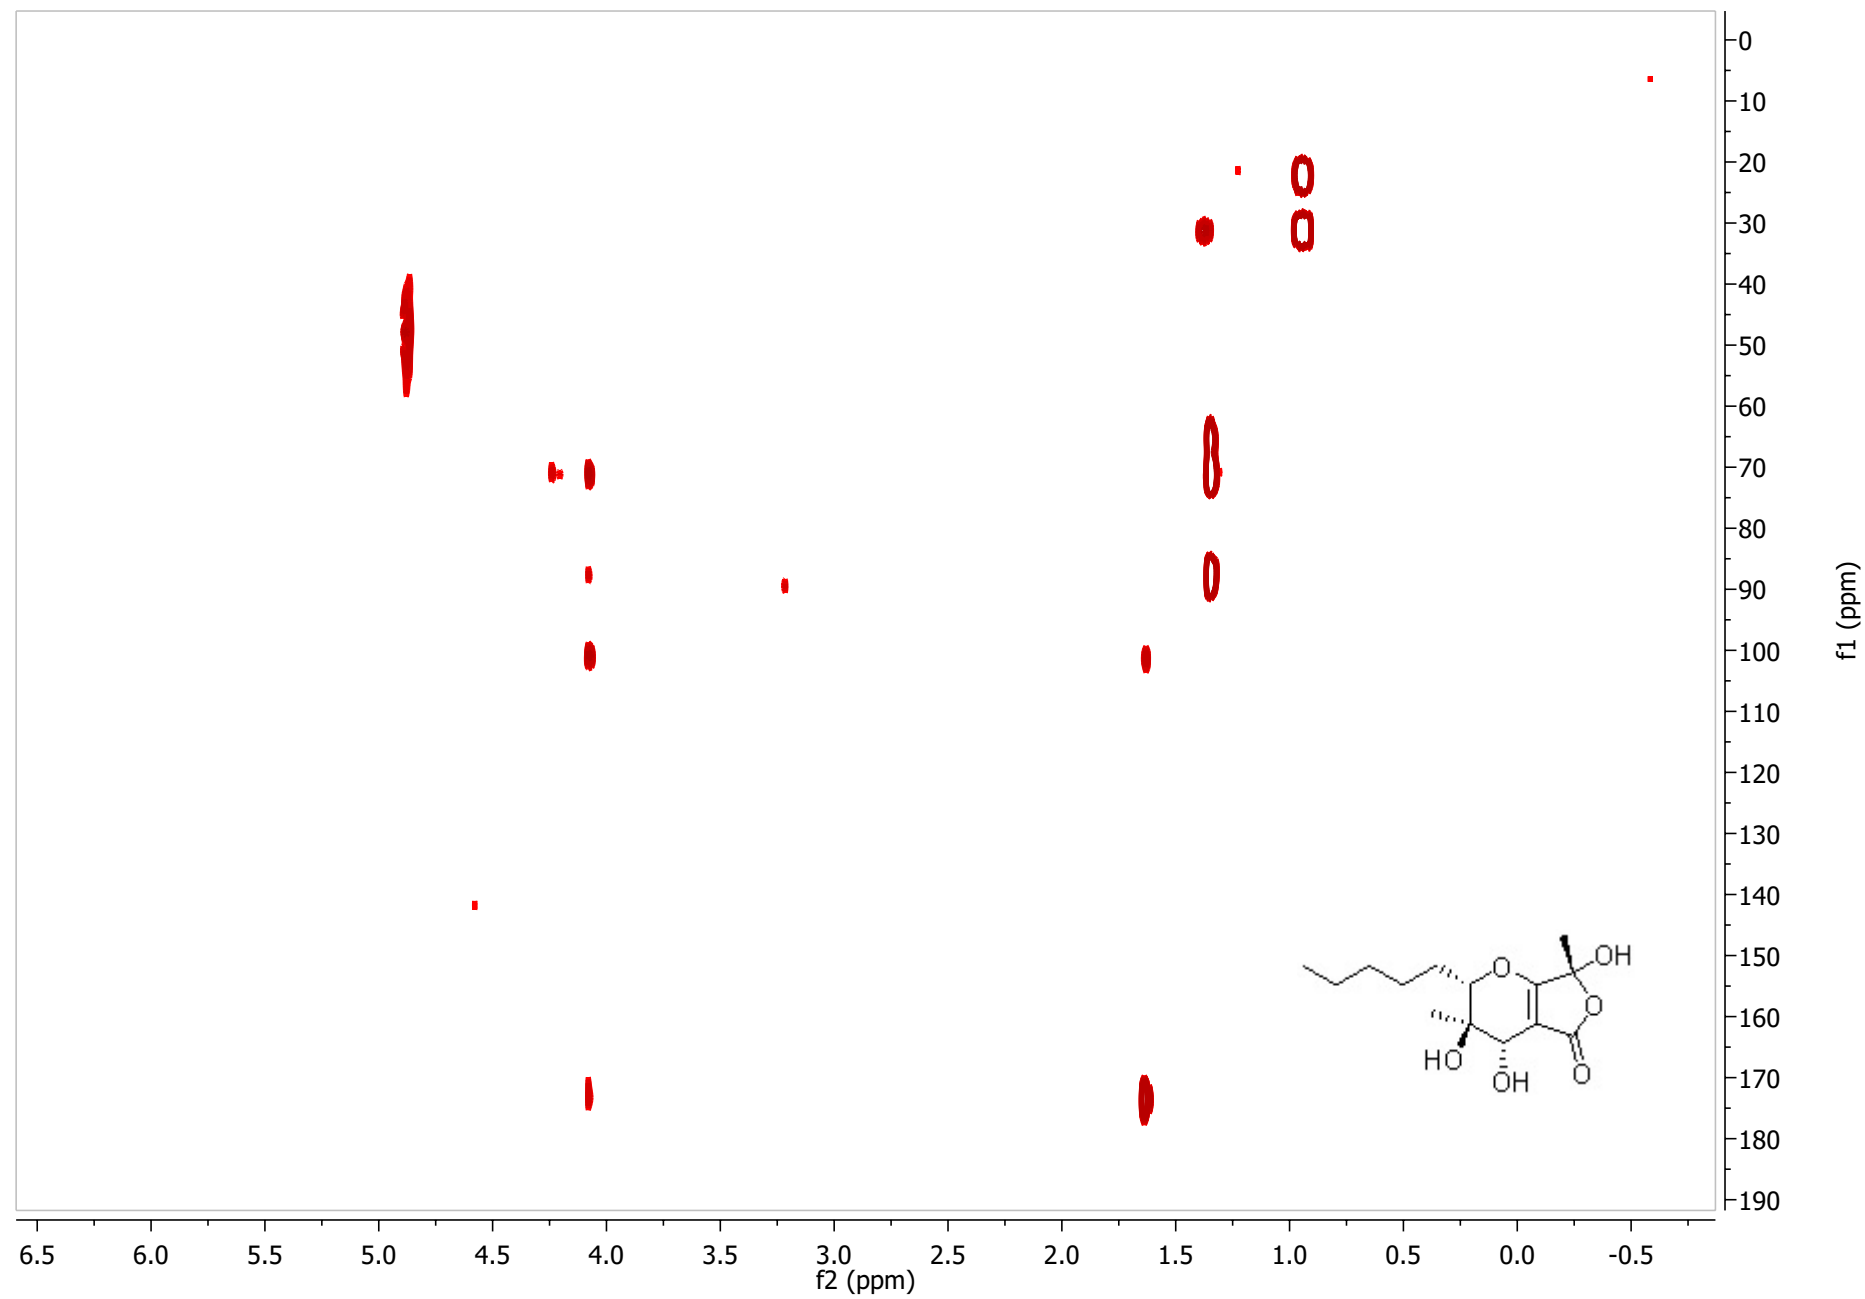

<sup>1</sup>H NMR spectrum of compound **7** (*R*-MTPA of **1**) (400 MHz in methanol-*d*<sub>4</sub>)

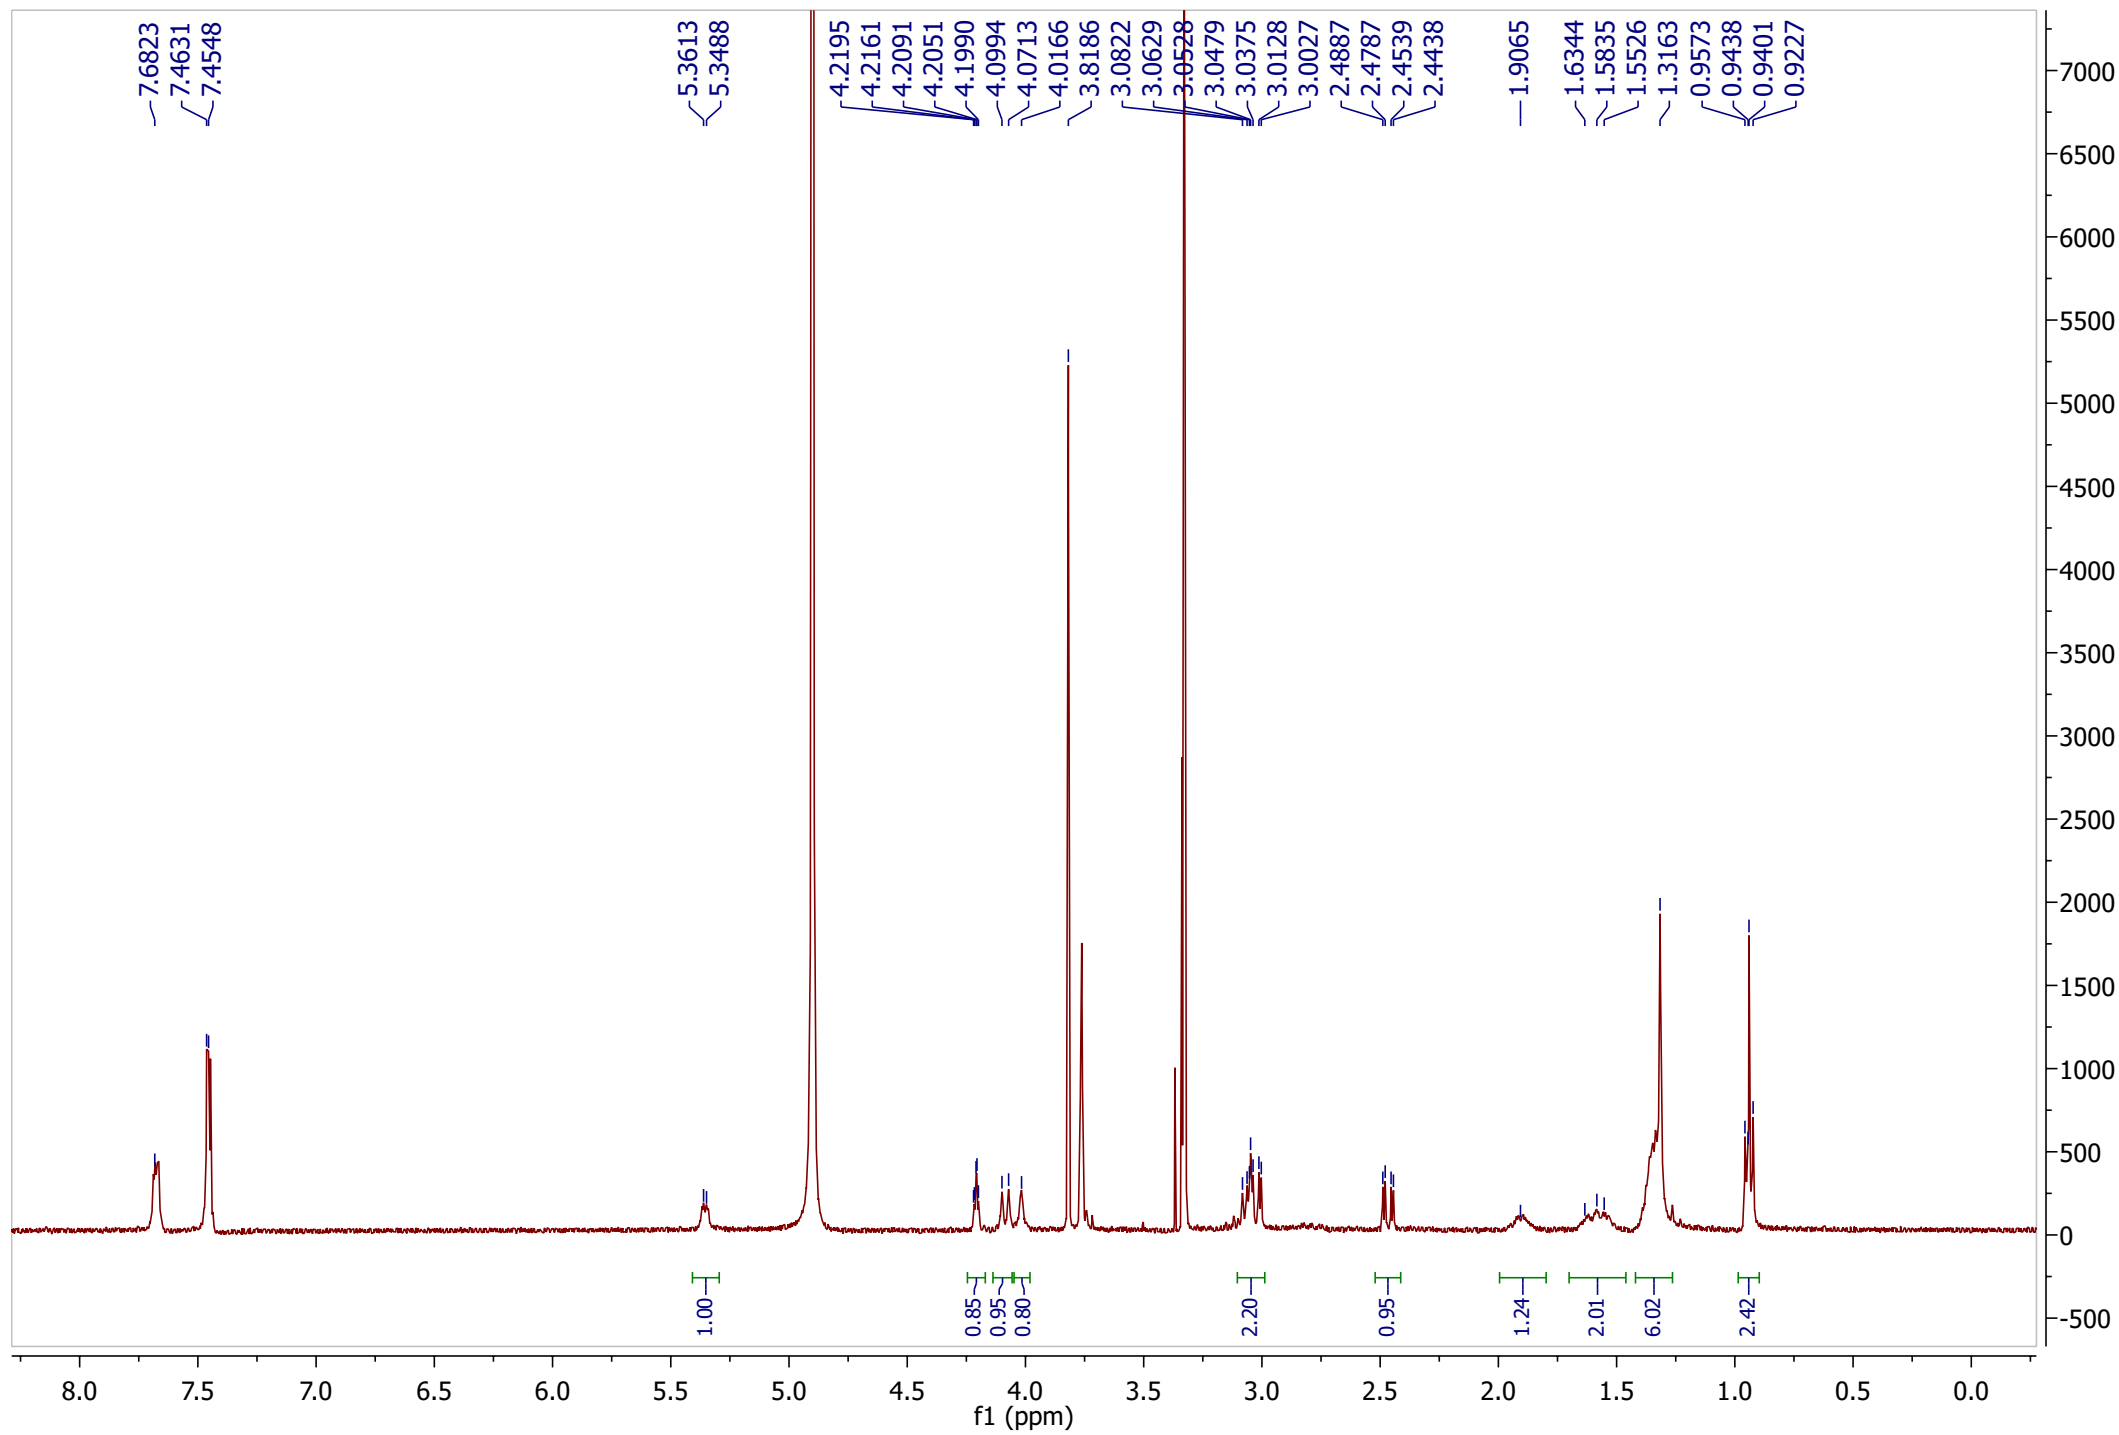

<sup>1</sup>H NMR spectrum of compound **8** (S-MTPA of **1**) (400 MHz in methanol-d<sub>4</sub>)

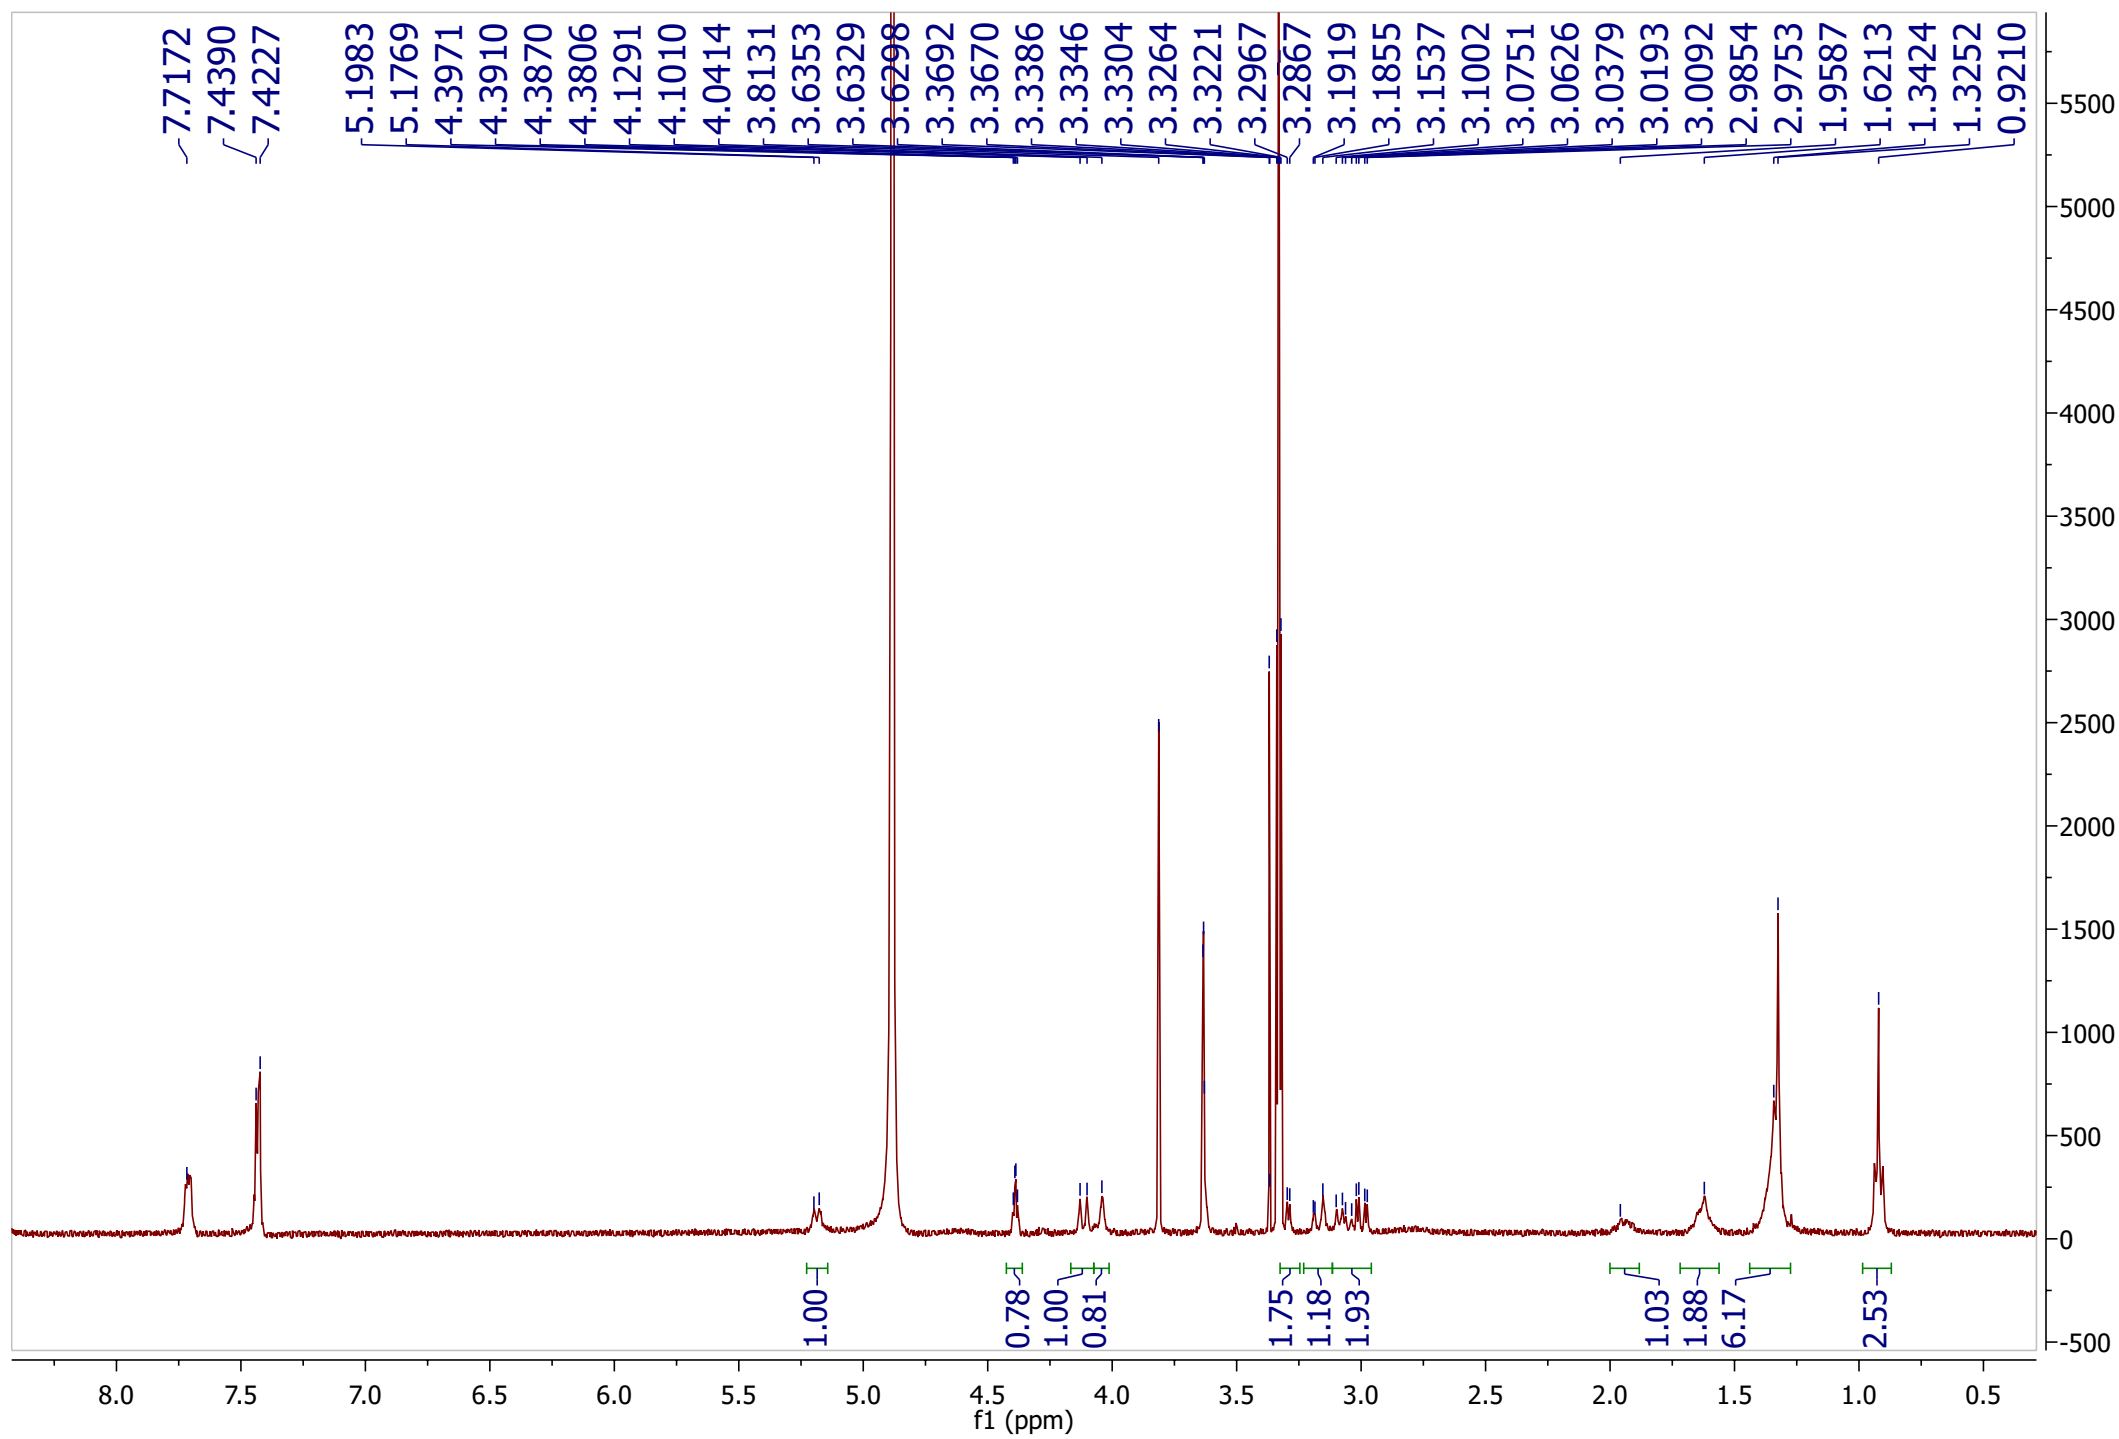

$^1\text{H}$  NMR spectrum of compound **9** (*R*-MTPA of **1**) (400 MHz in methanol- $d_4$ )

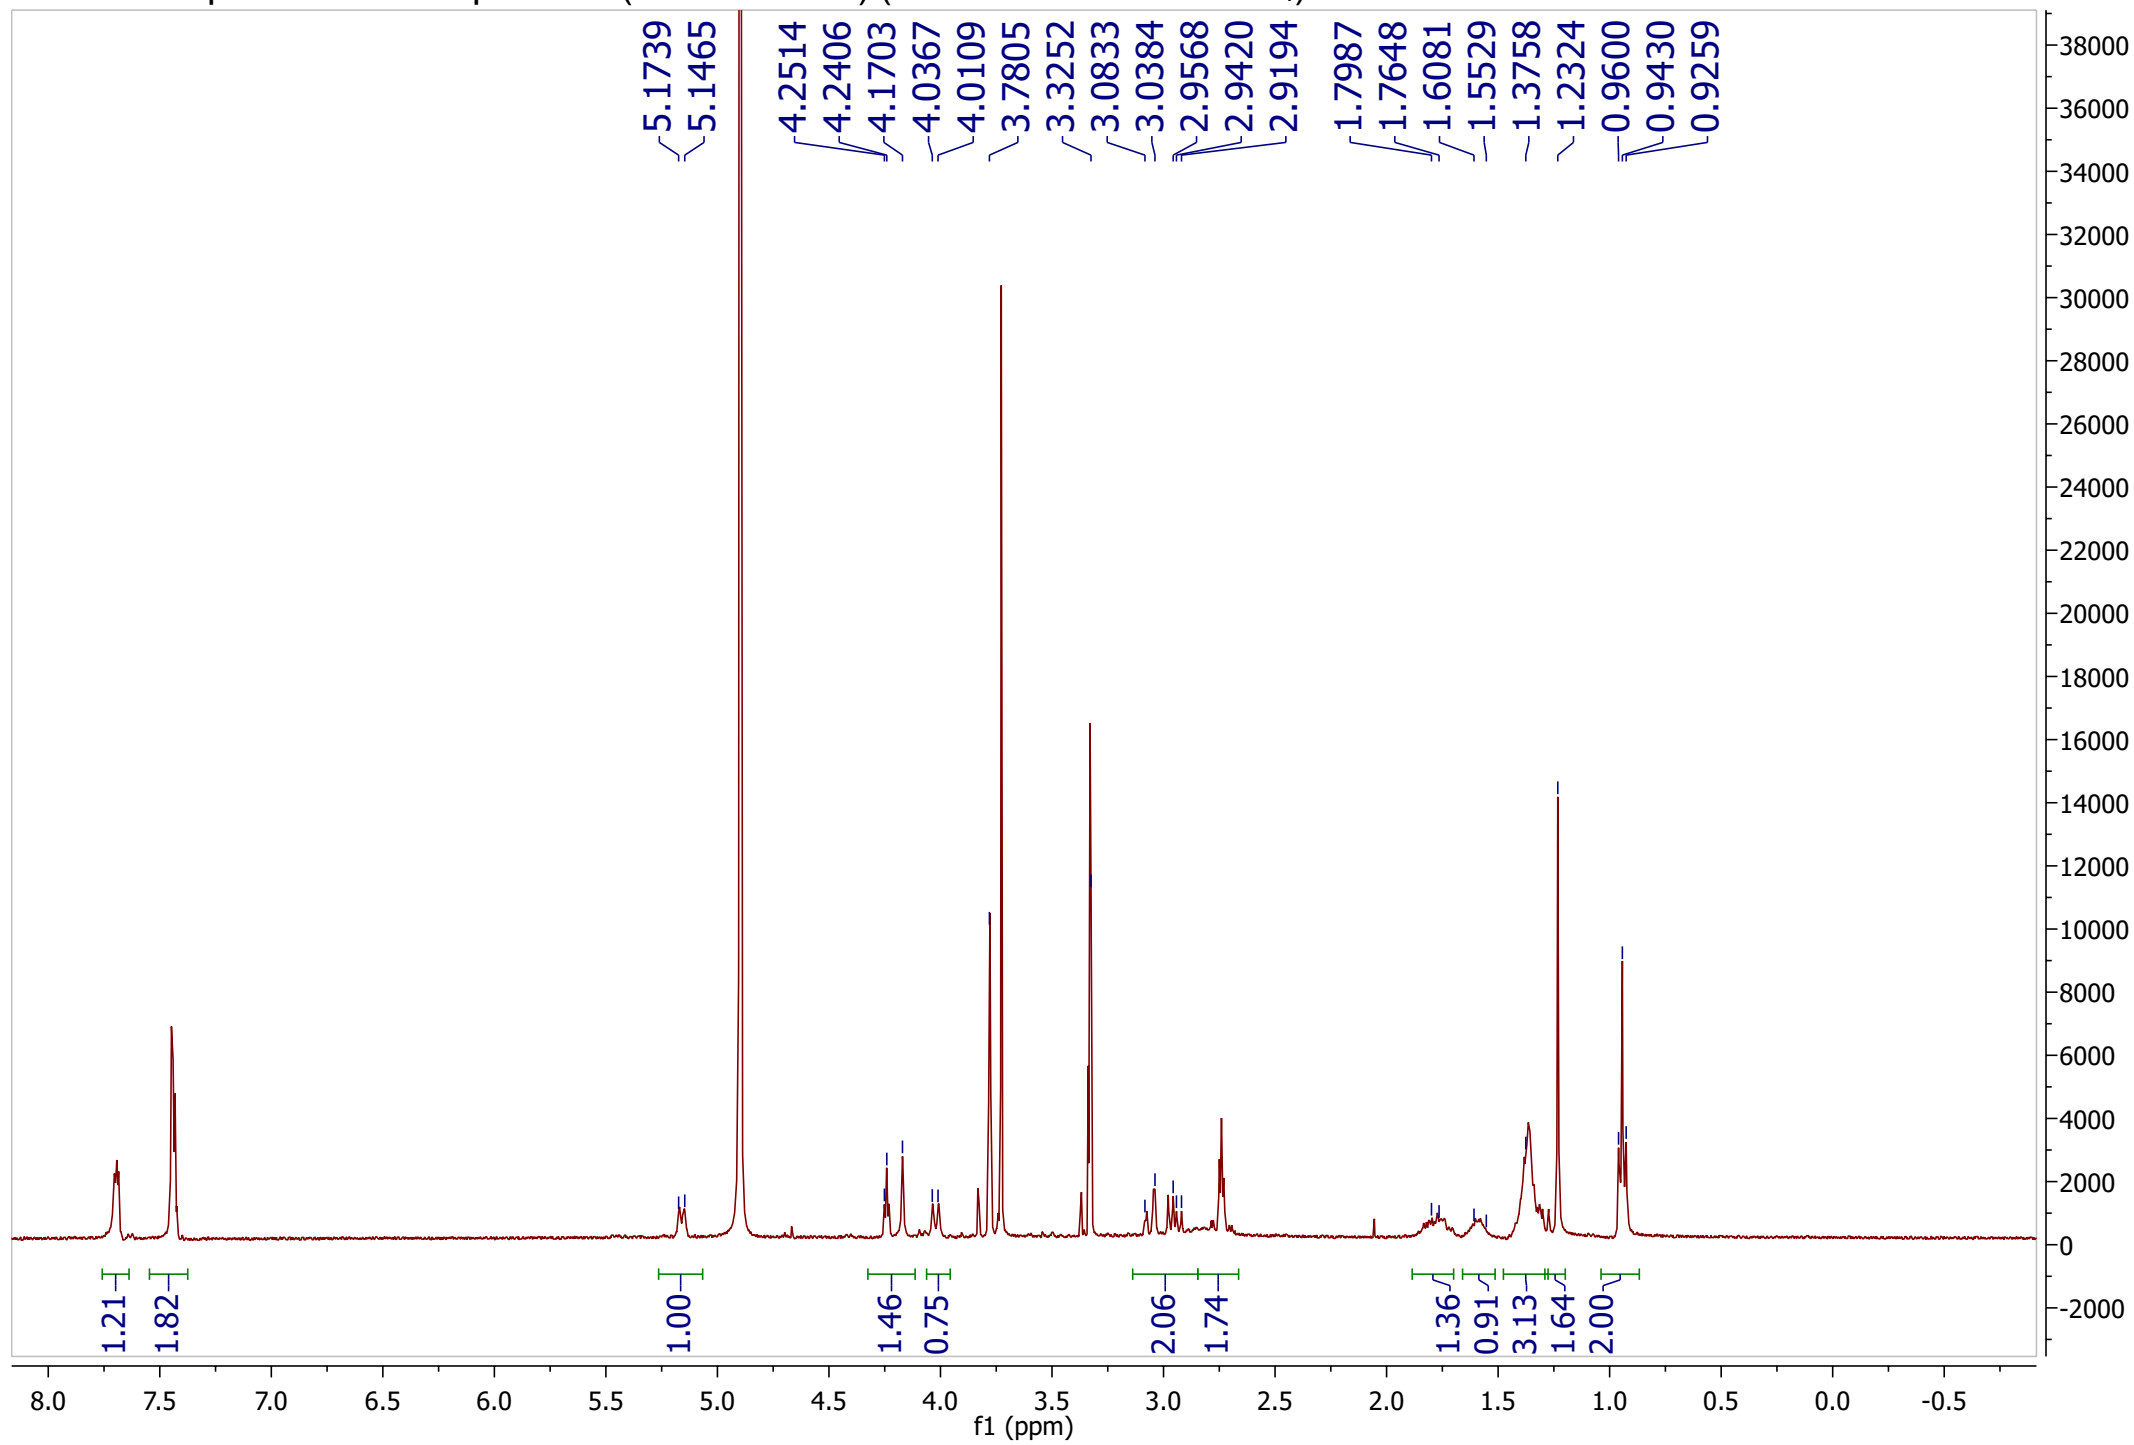

$^1\text{H}$ - $^1\text{H}$  COSY of compound **9** (*R*-MTPA of **2**)

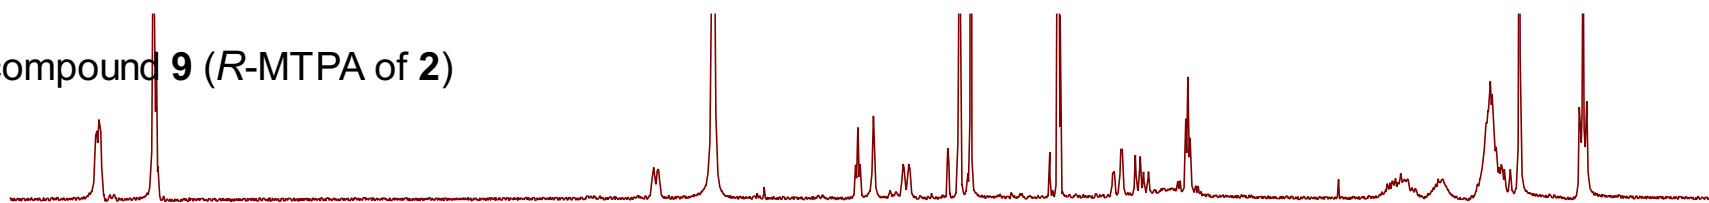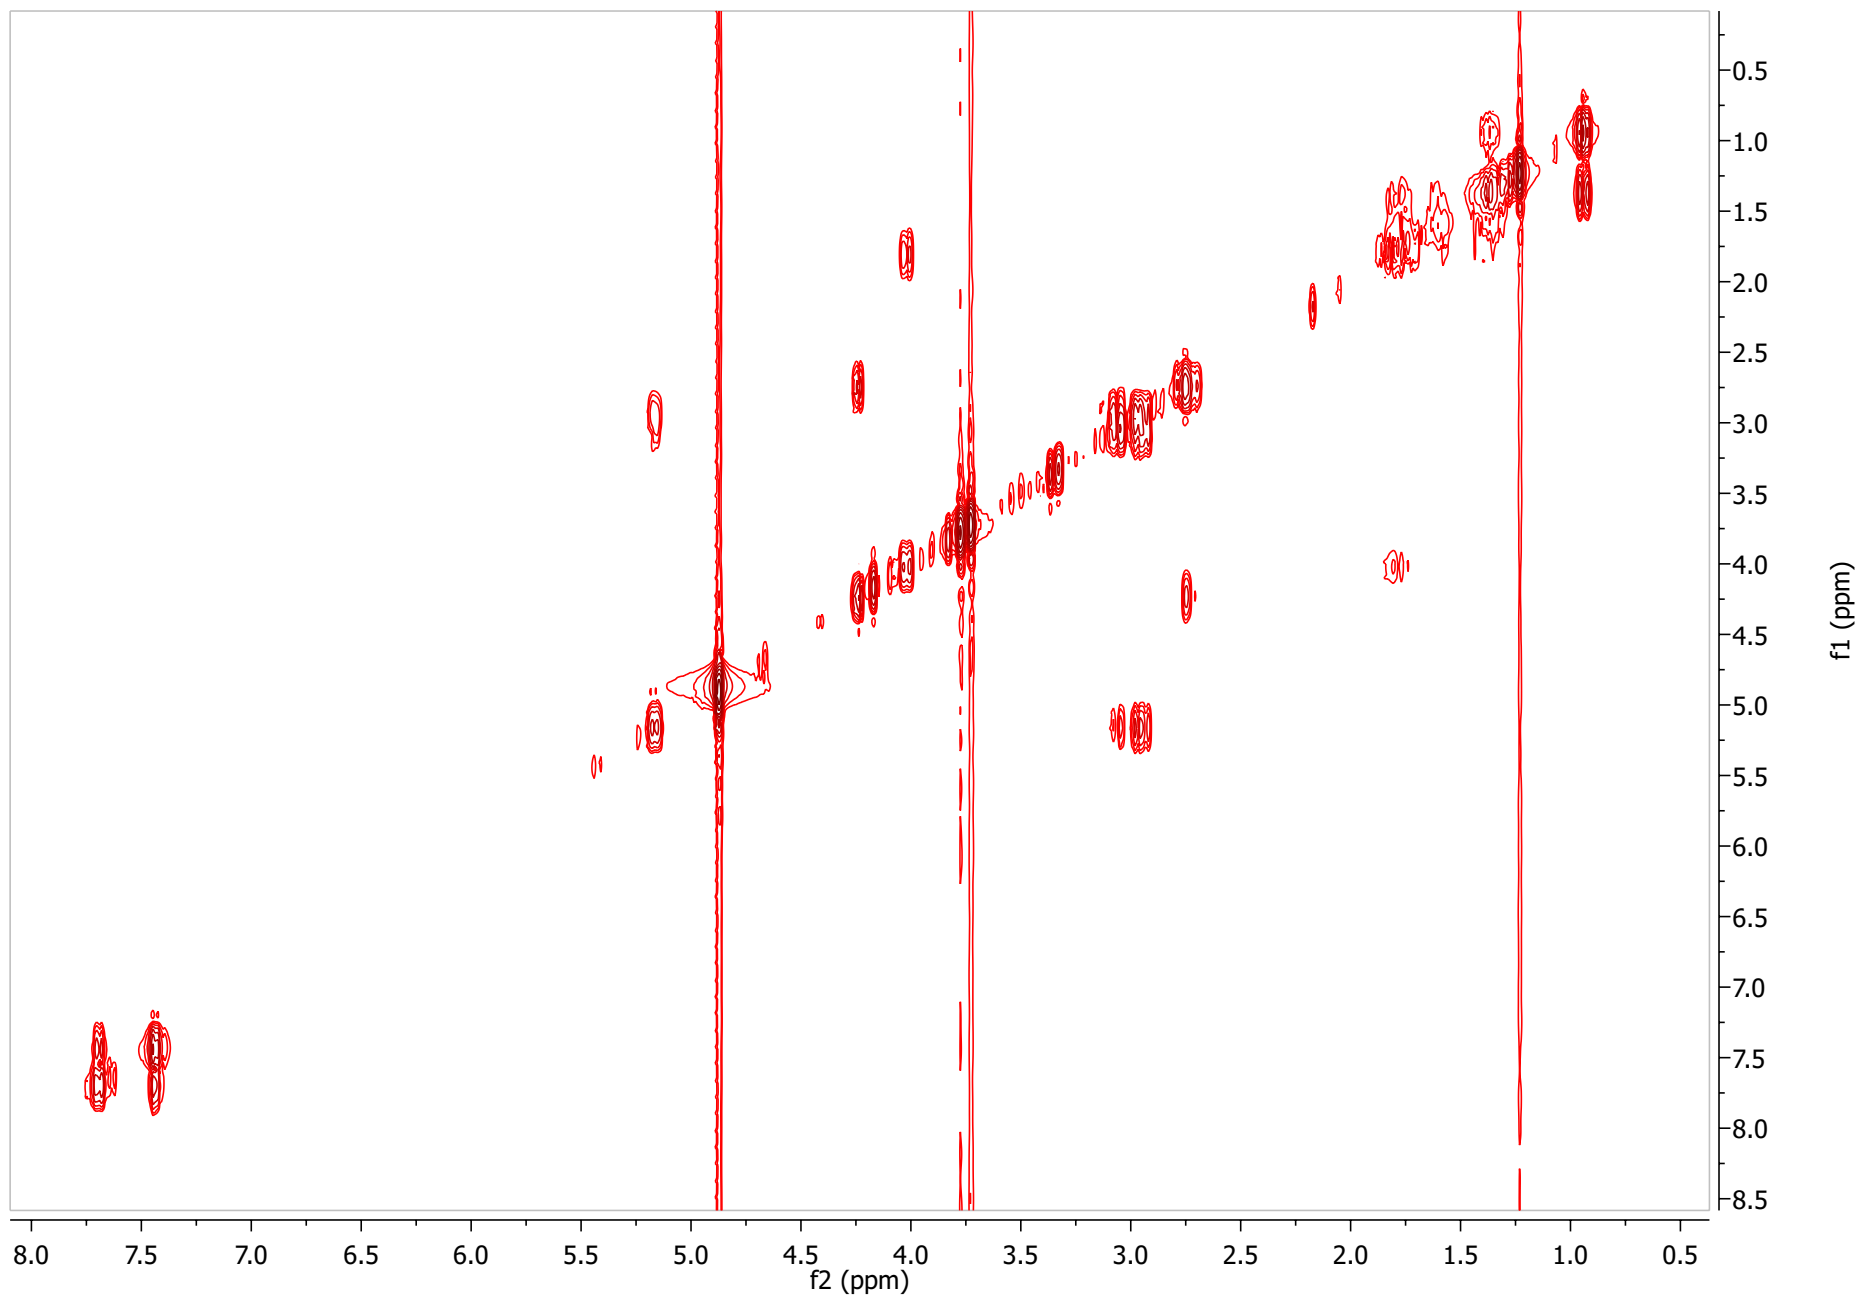

$^1\text{H}$  NMR spectrum of compound **10** (S-MTPA of **2**) (400 MHz in methanol- $d_4$ )

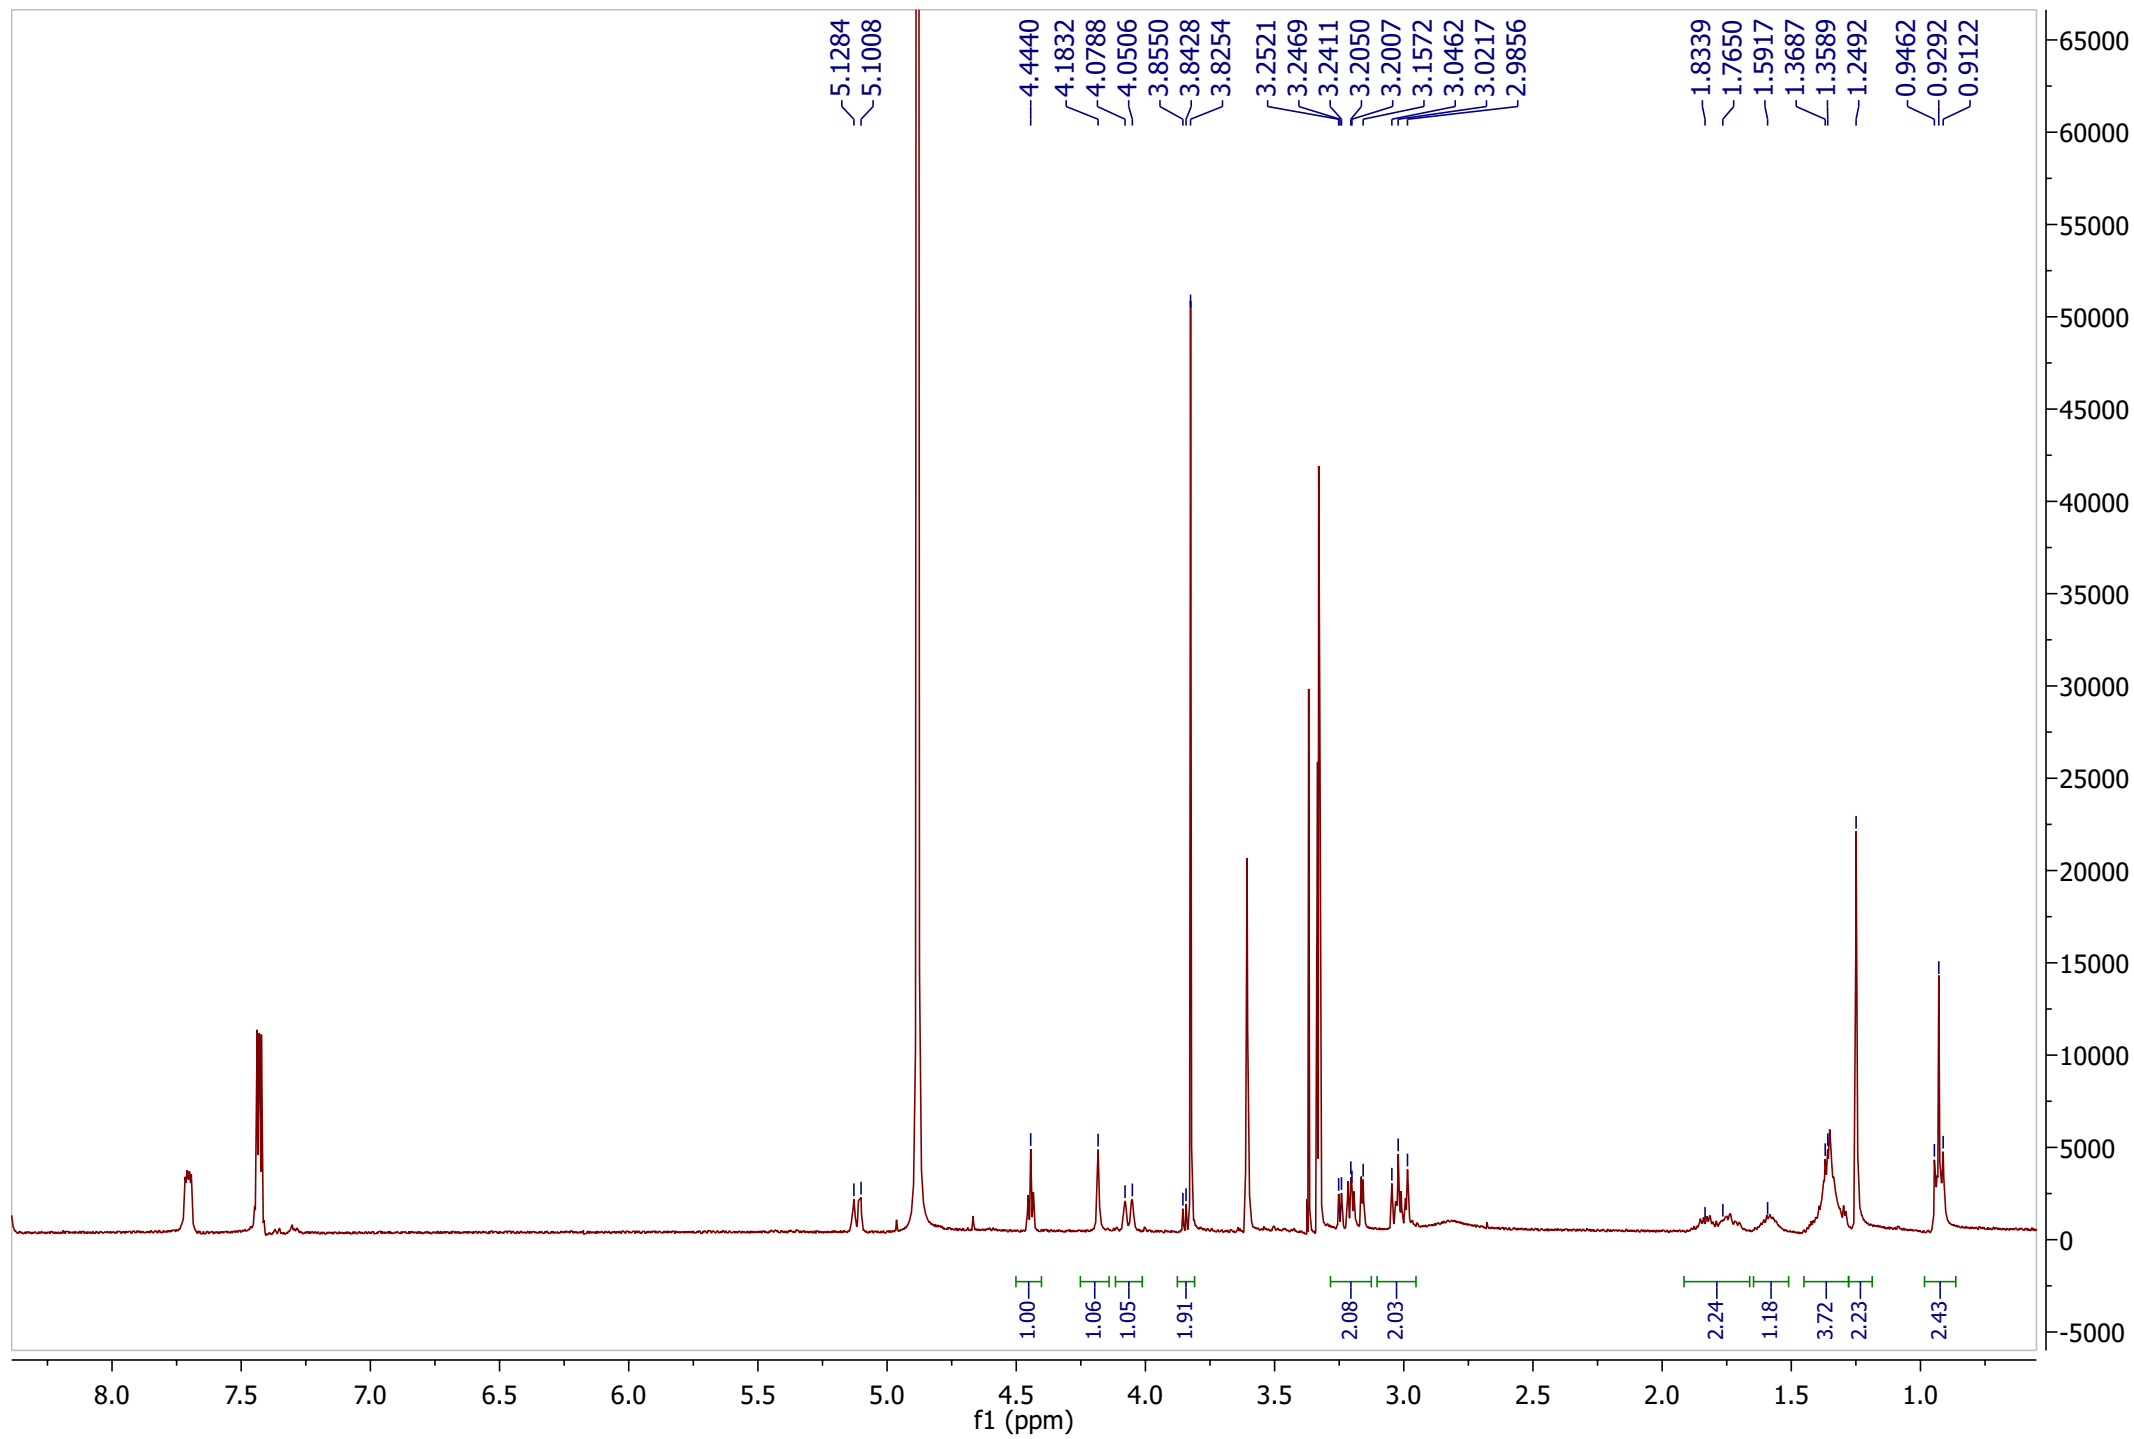

$^1\text{H}$ - $^1\text{H}$  COSY of compound **10** (S-MTPA of **2**)

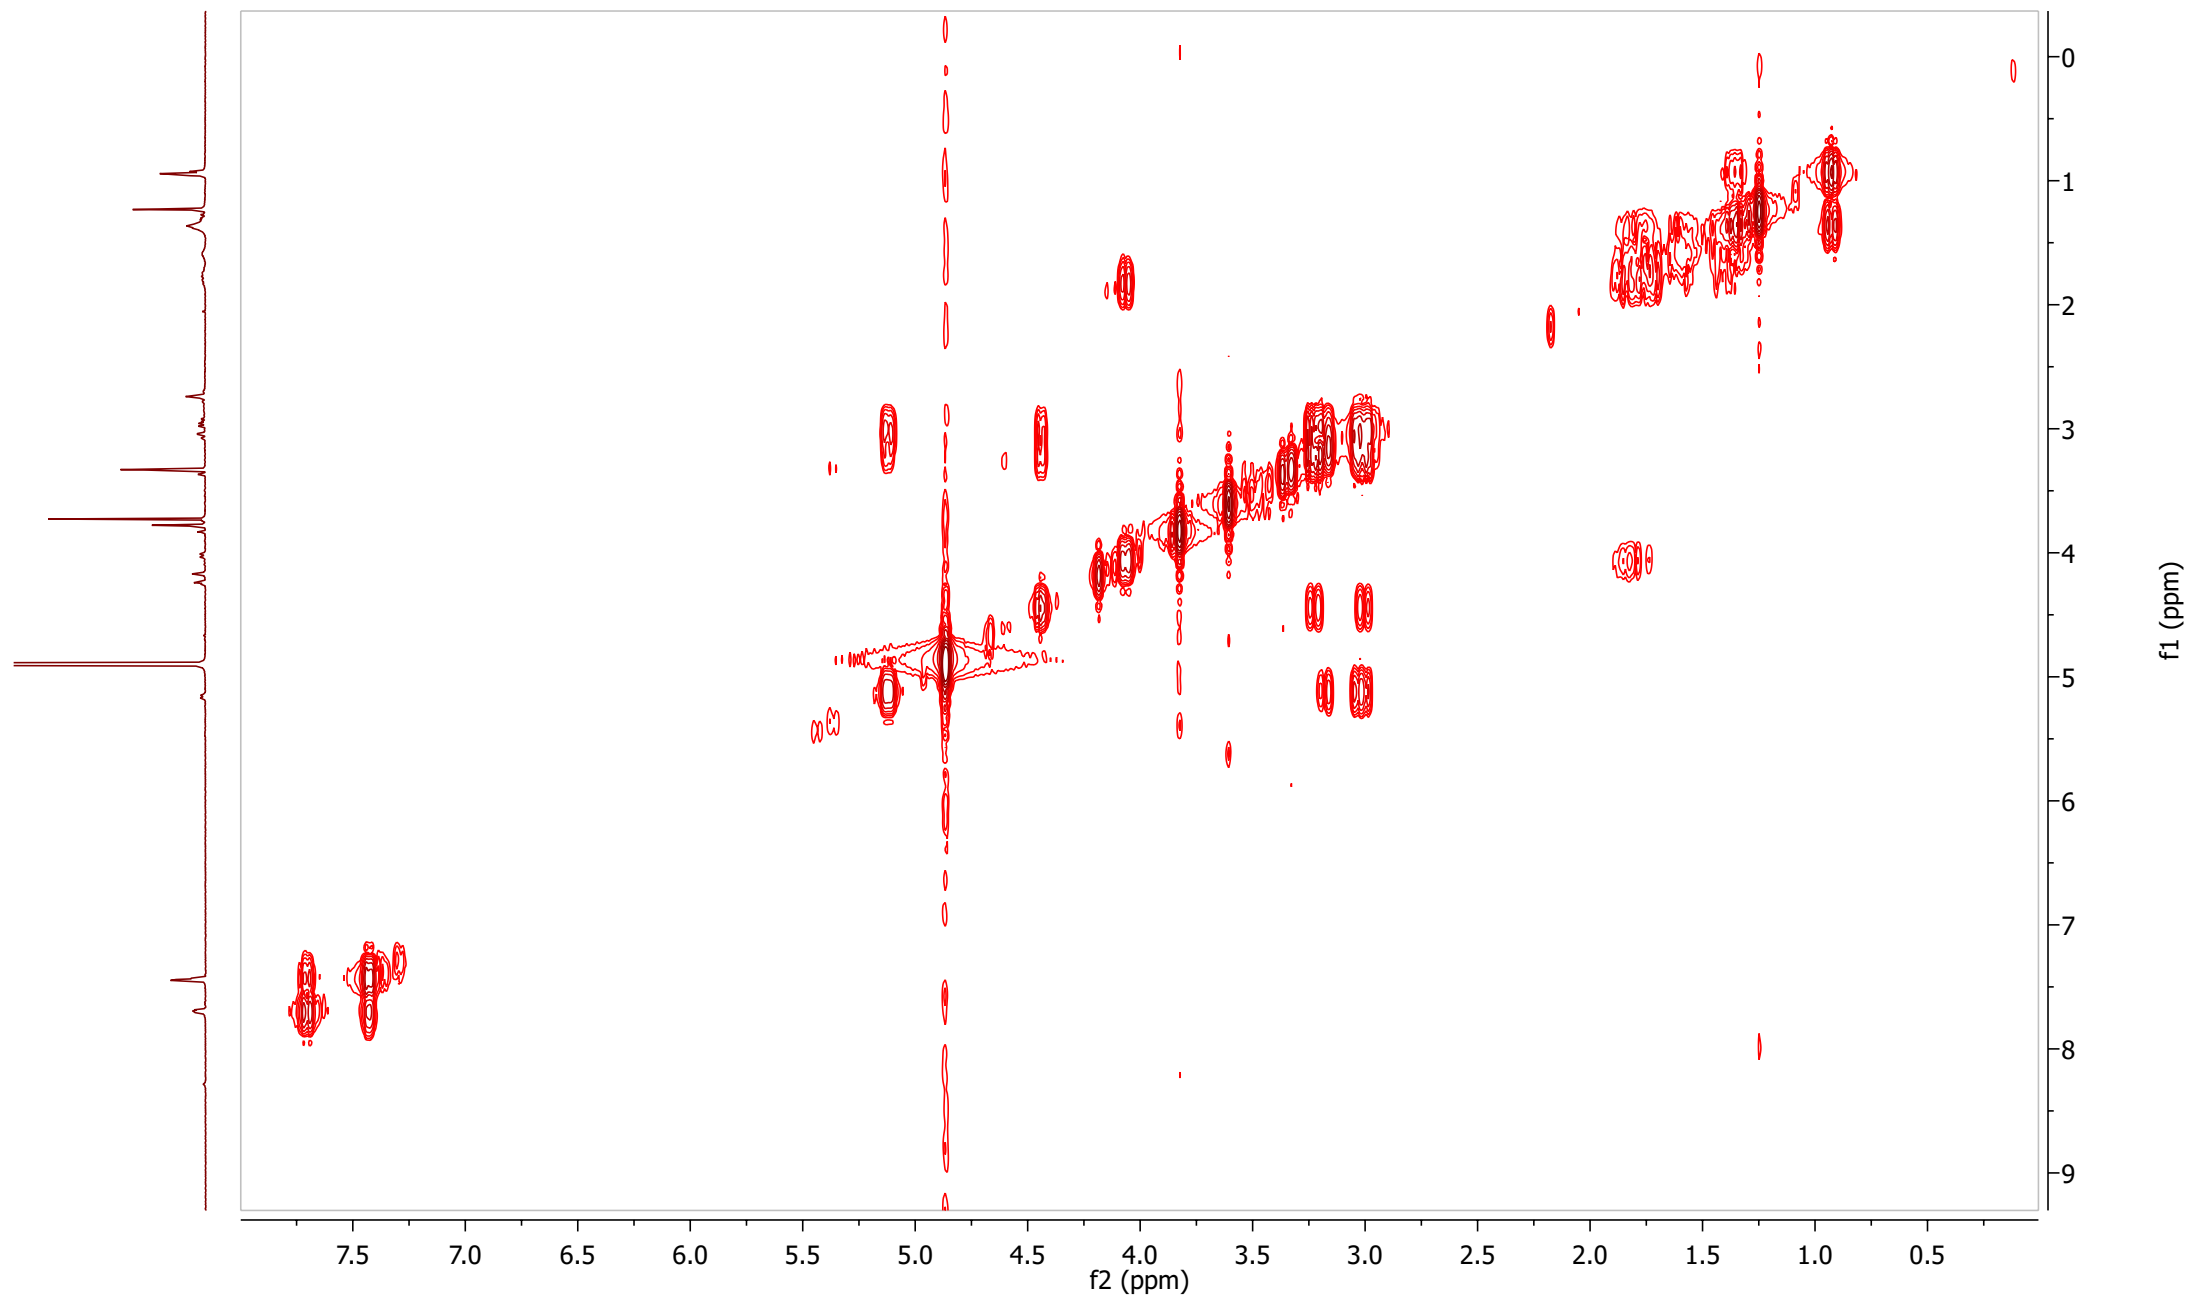



<sup>1</sup>H NMR spectrum of compound **11** (400 MHz in methanol-d<sub>4</sub>)

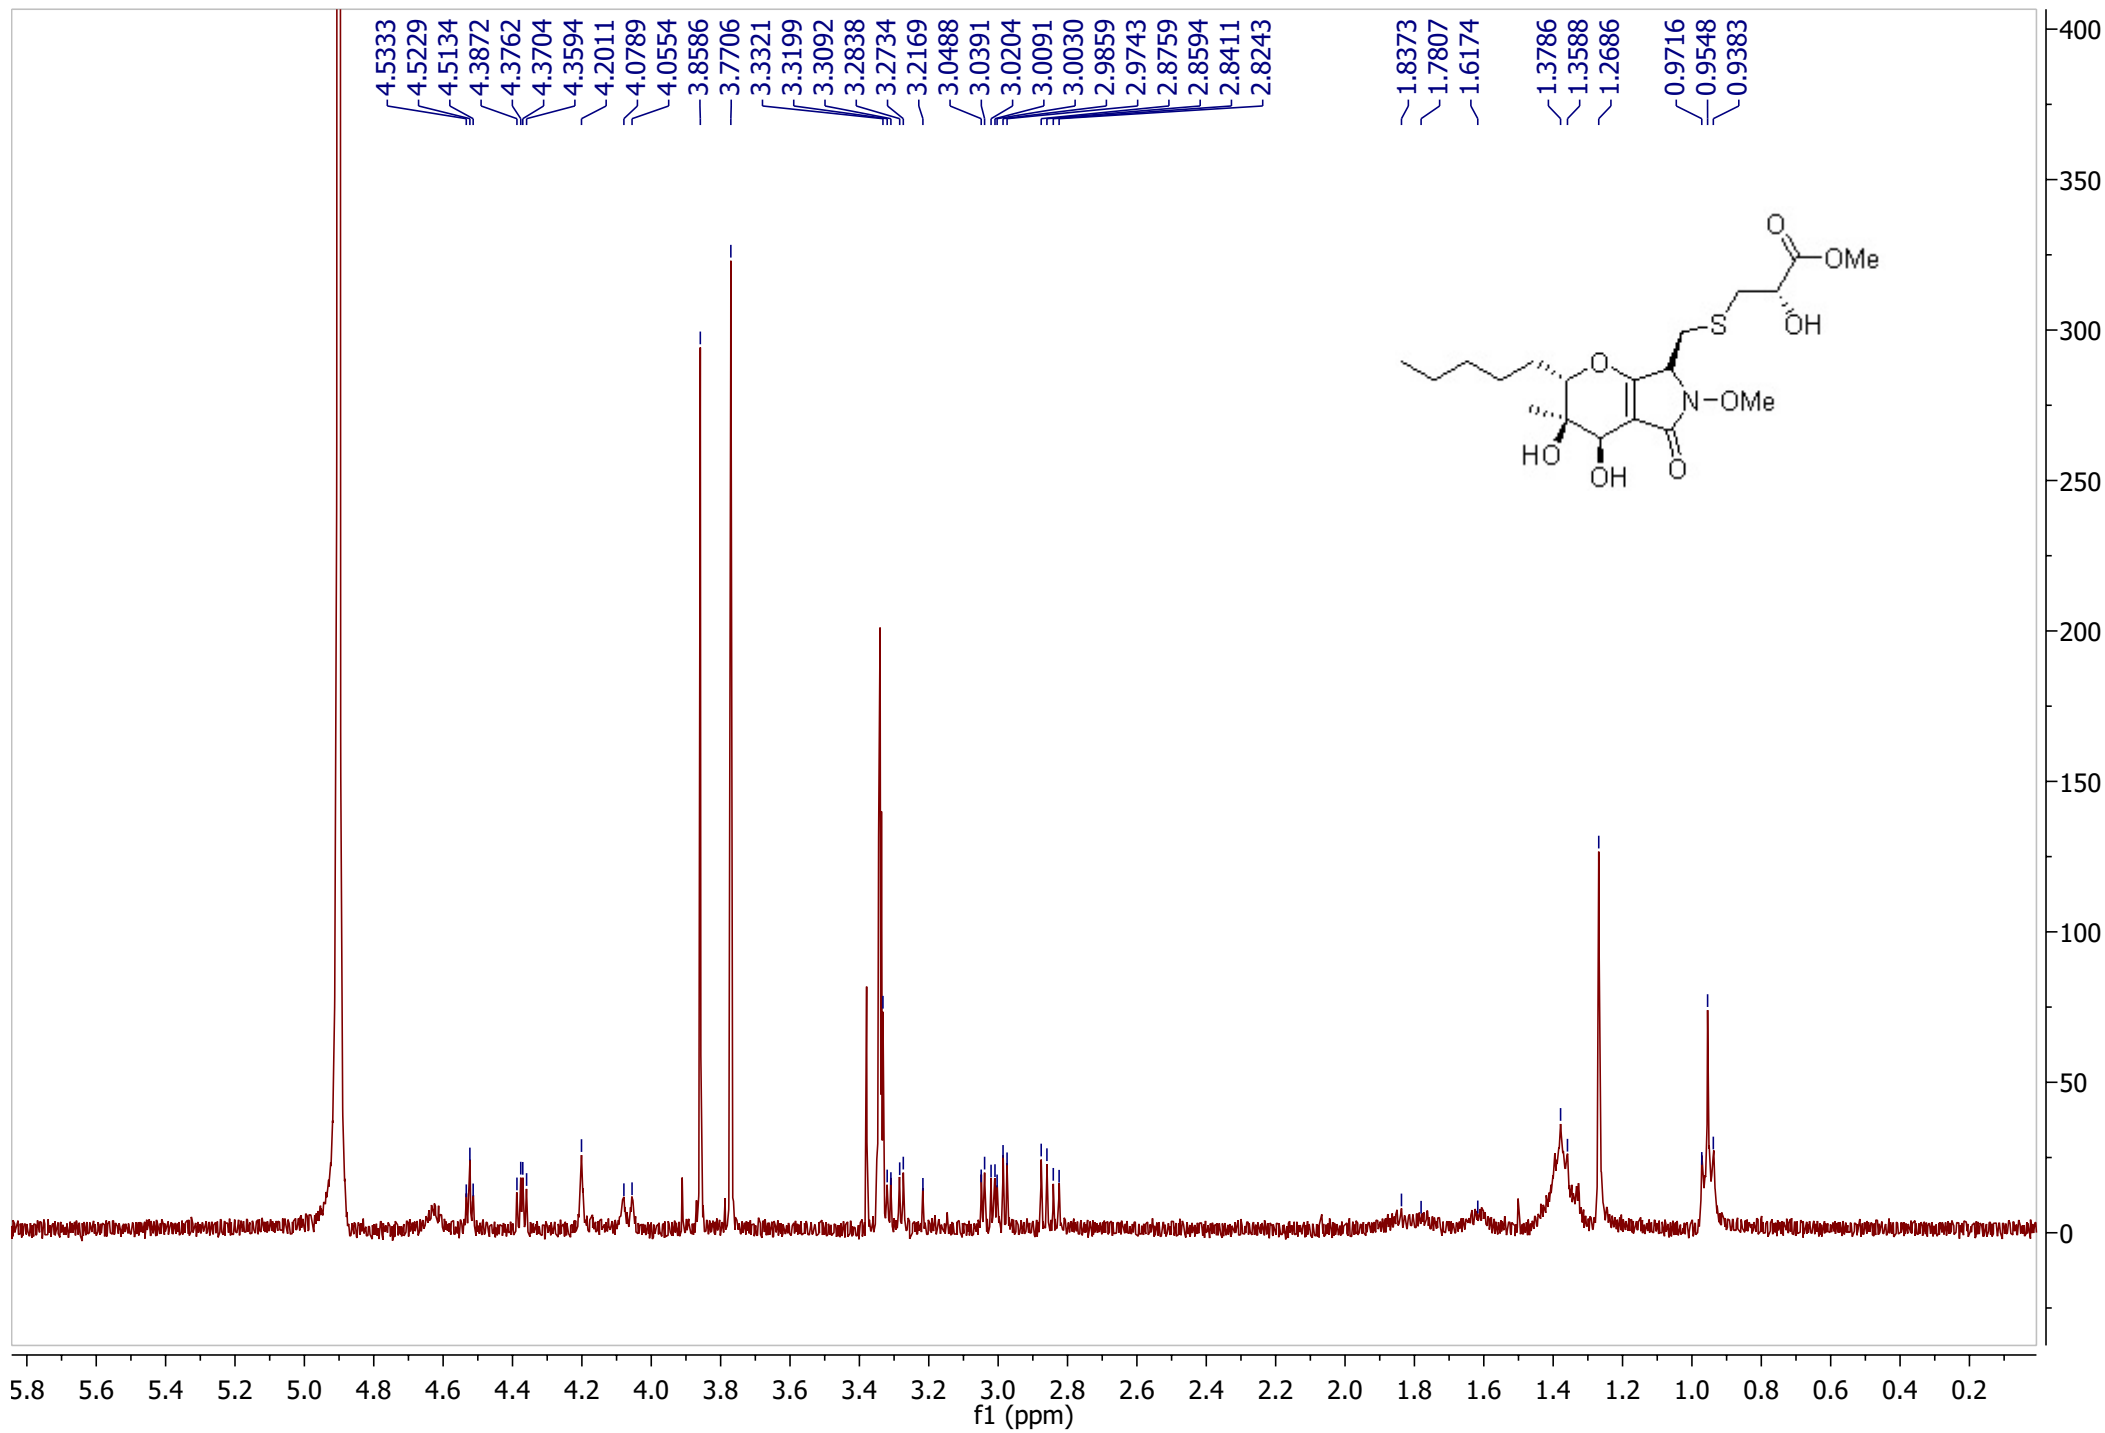

$^{13}\text{C}$  NMR spectrum of compound **11**

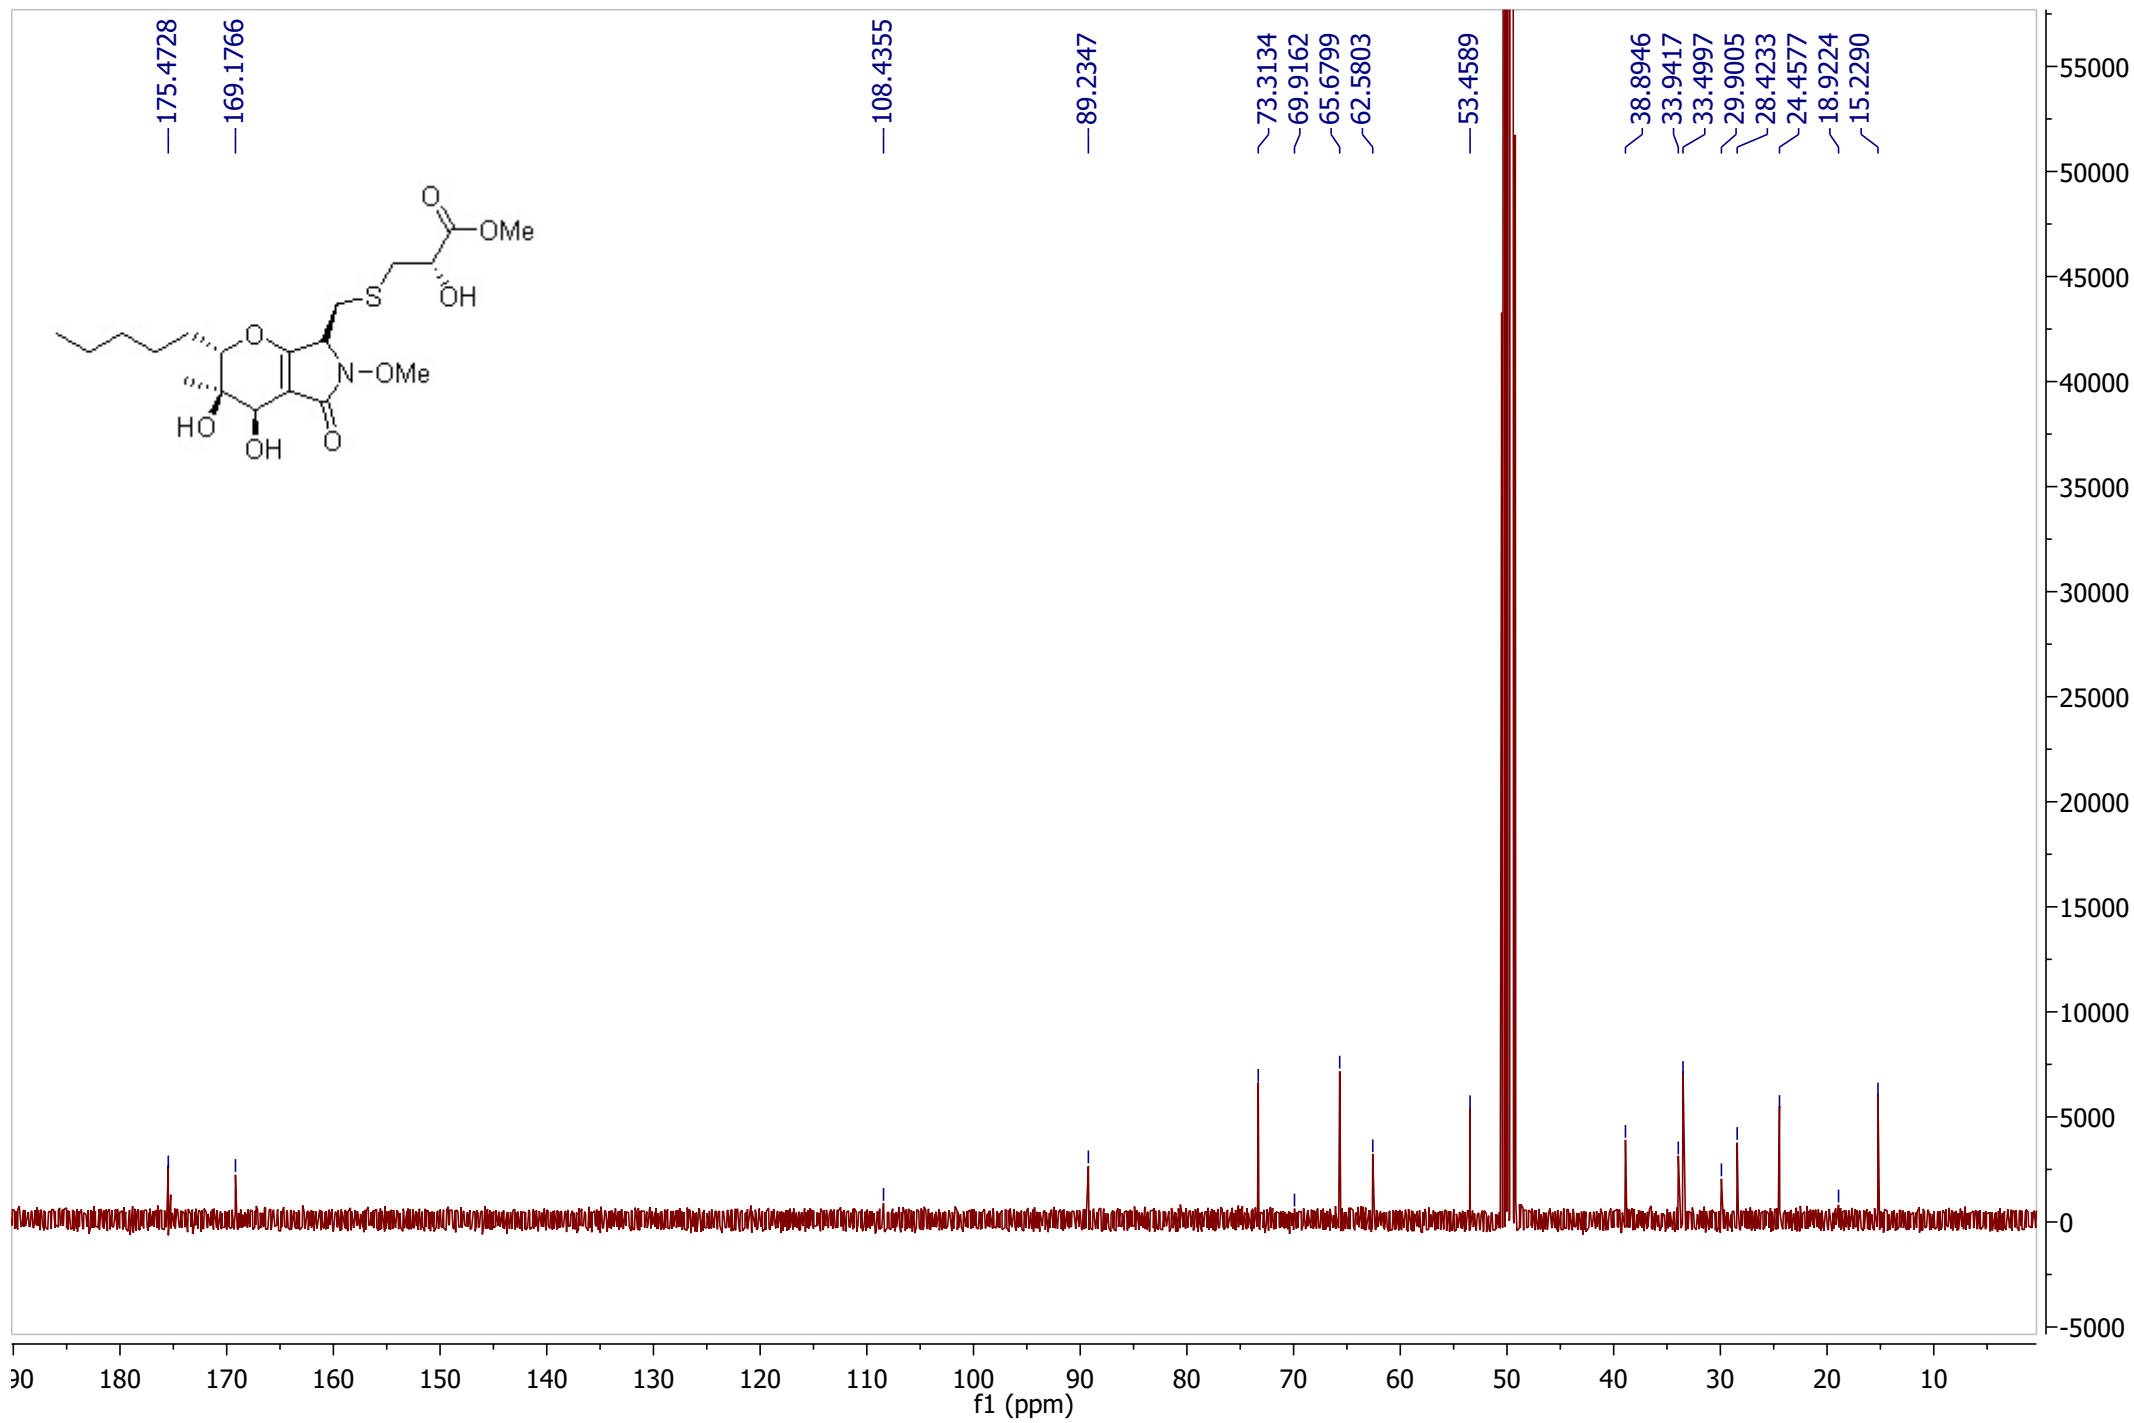

$^1\text{H}$ - $^1\text{H}$  COSY of compound **11**

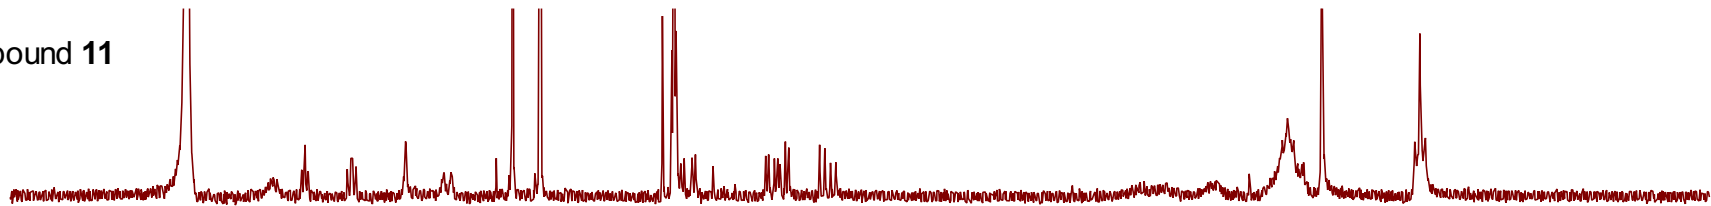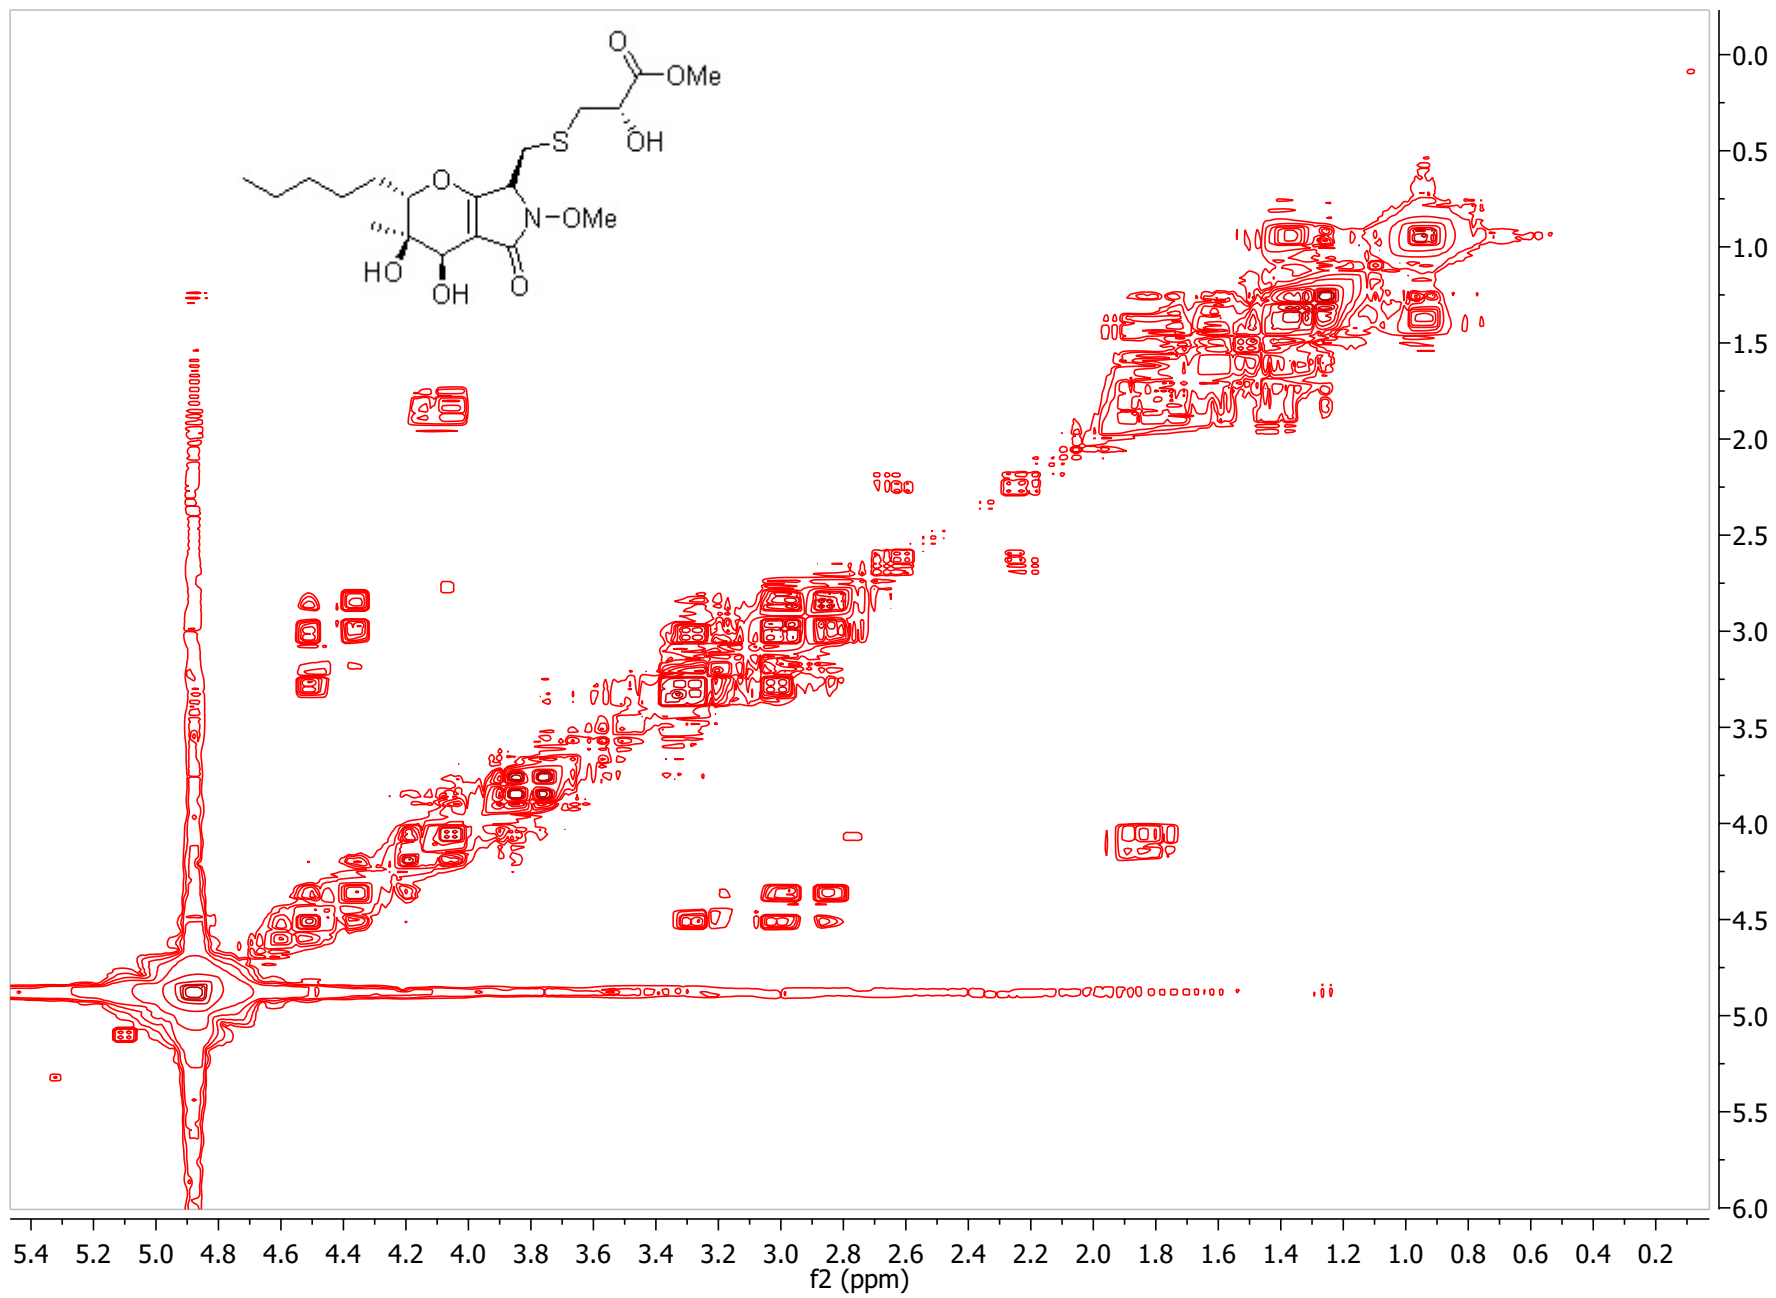

HSQC spectrum of compound 11

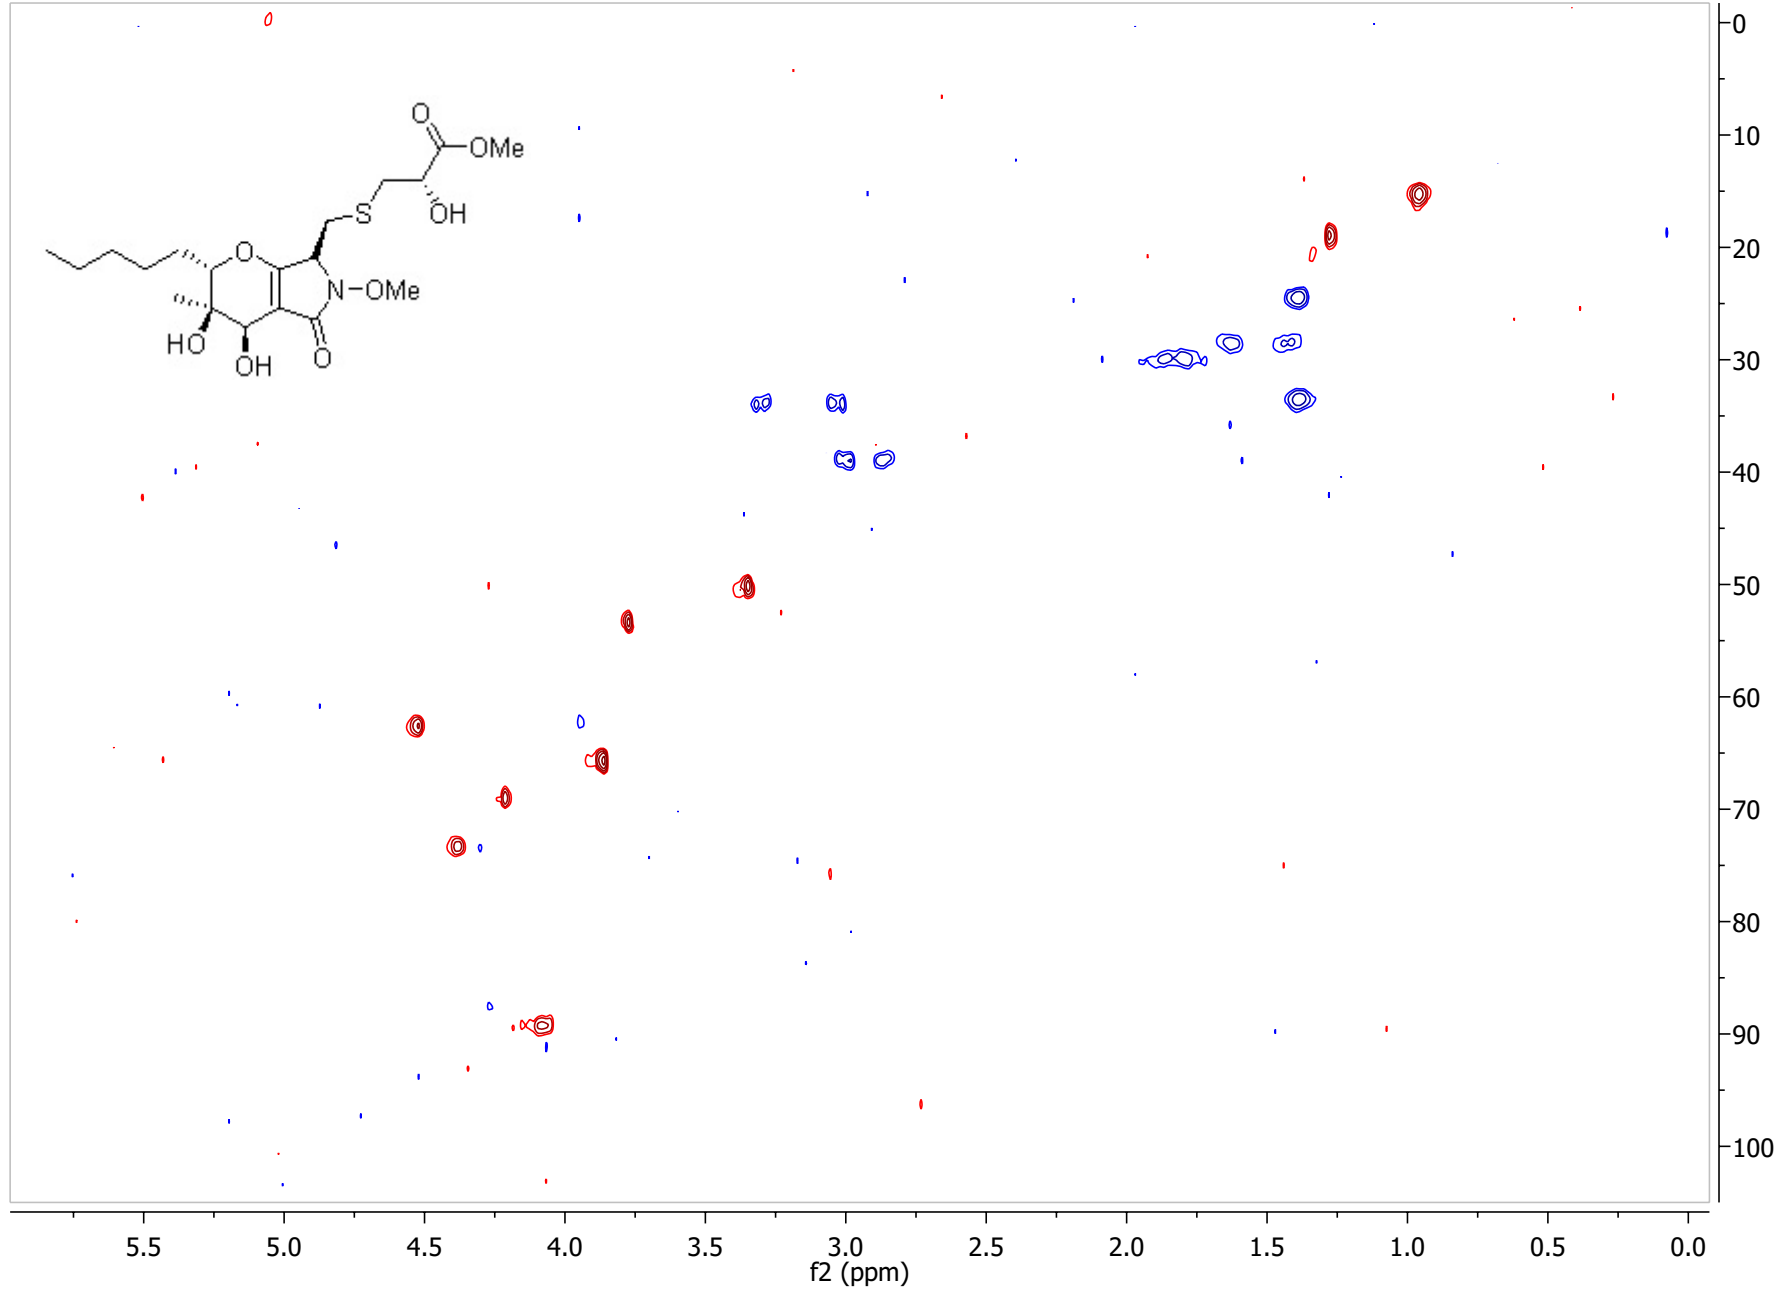

HMBC spectrum of compound 11

ft462G2-26-7-9-29-2016.300.ser  
FT462G2-26-7-NOESY-MeOD-9/29/2016

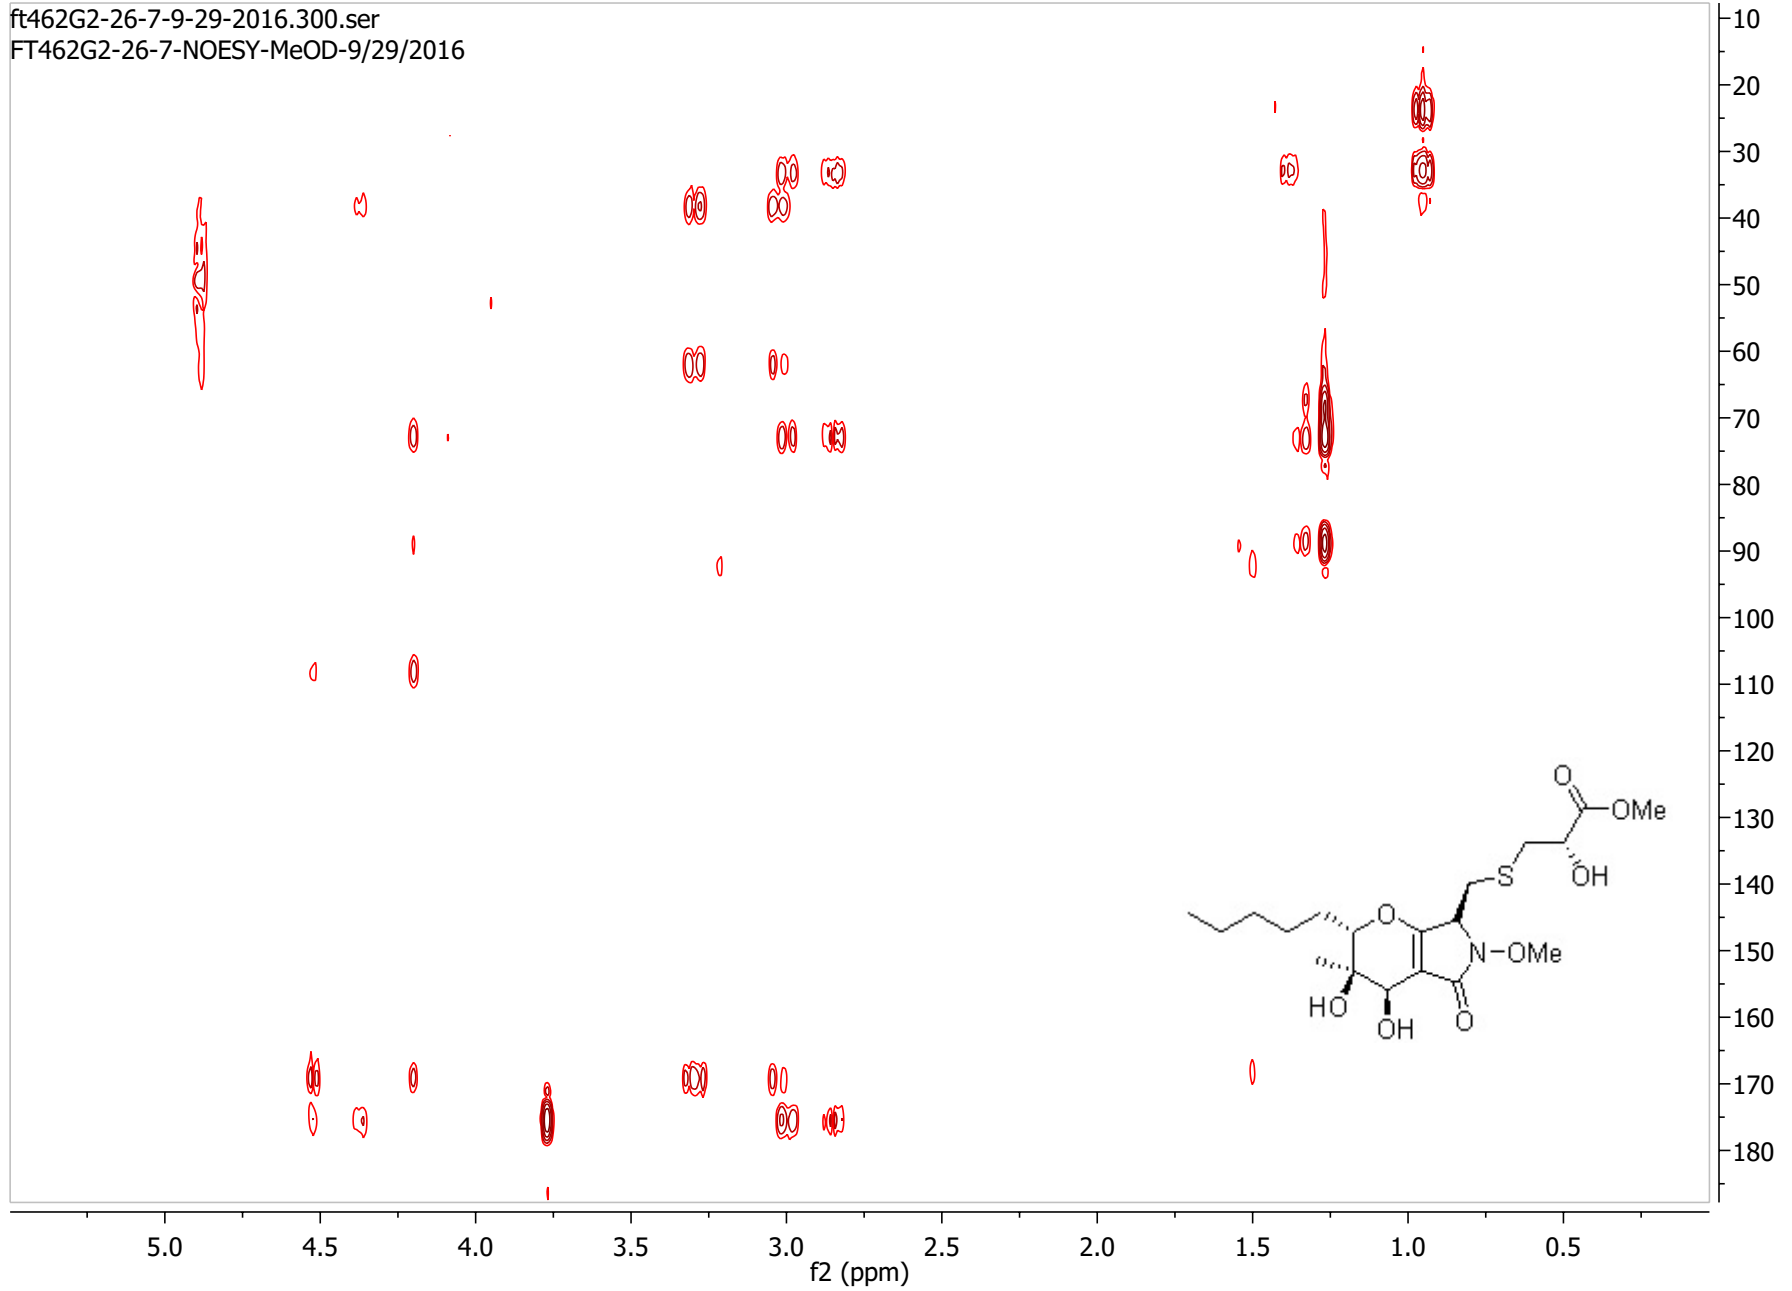

f1 (ppm)

f2 (ppm)

<sup>1</sup>H NMR spectrum of **12** (S-MTPA of **11**) (400 MHz in methanol-*d*<sub>4</sub>)

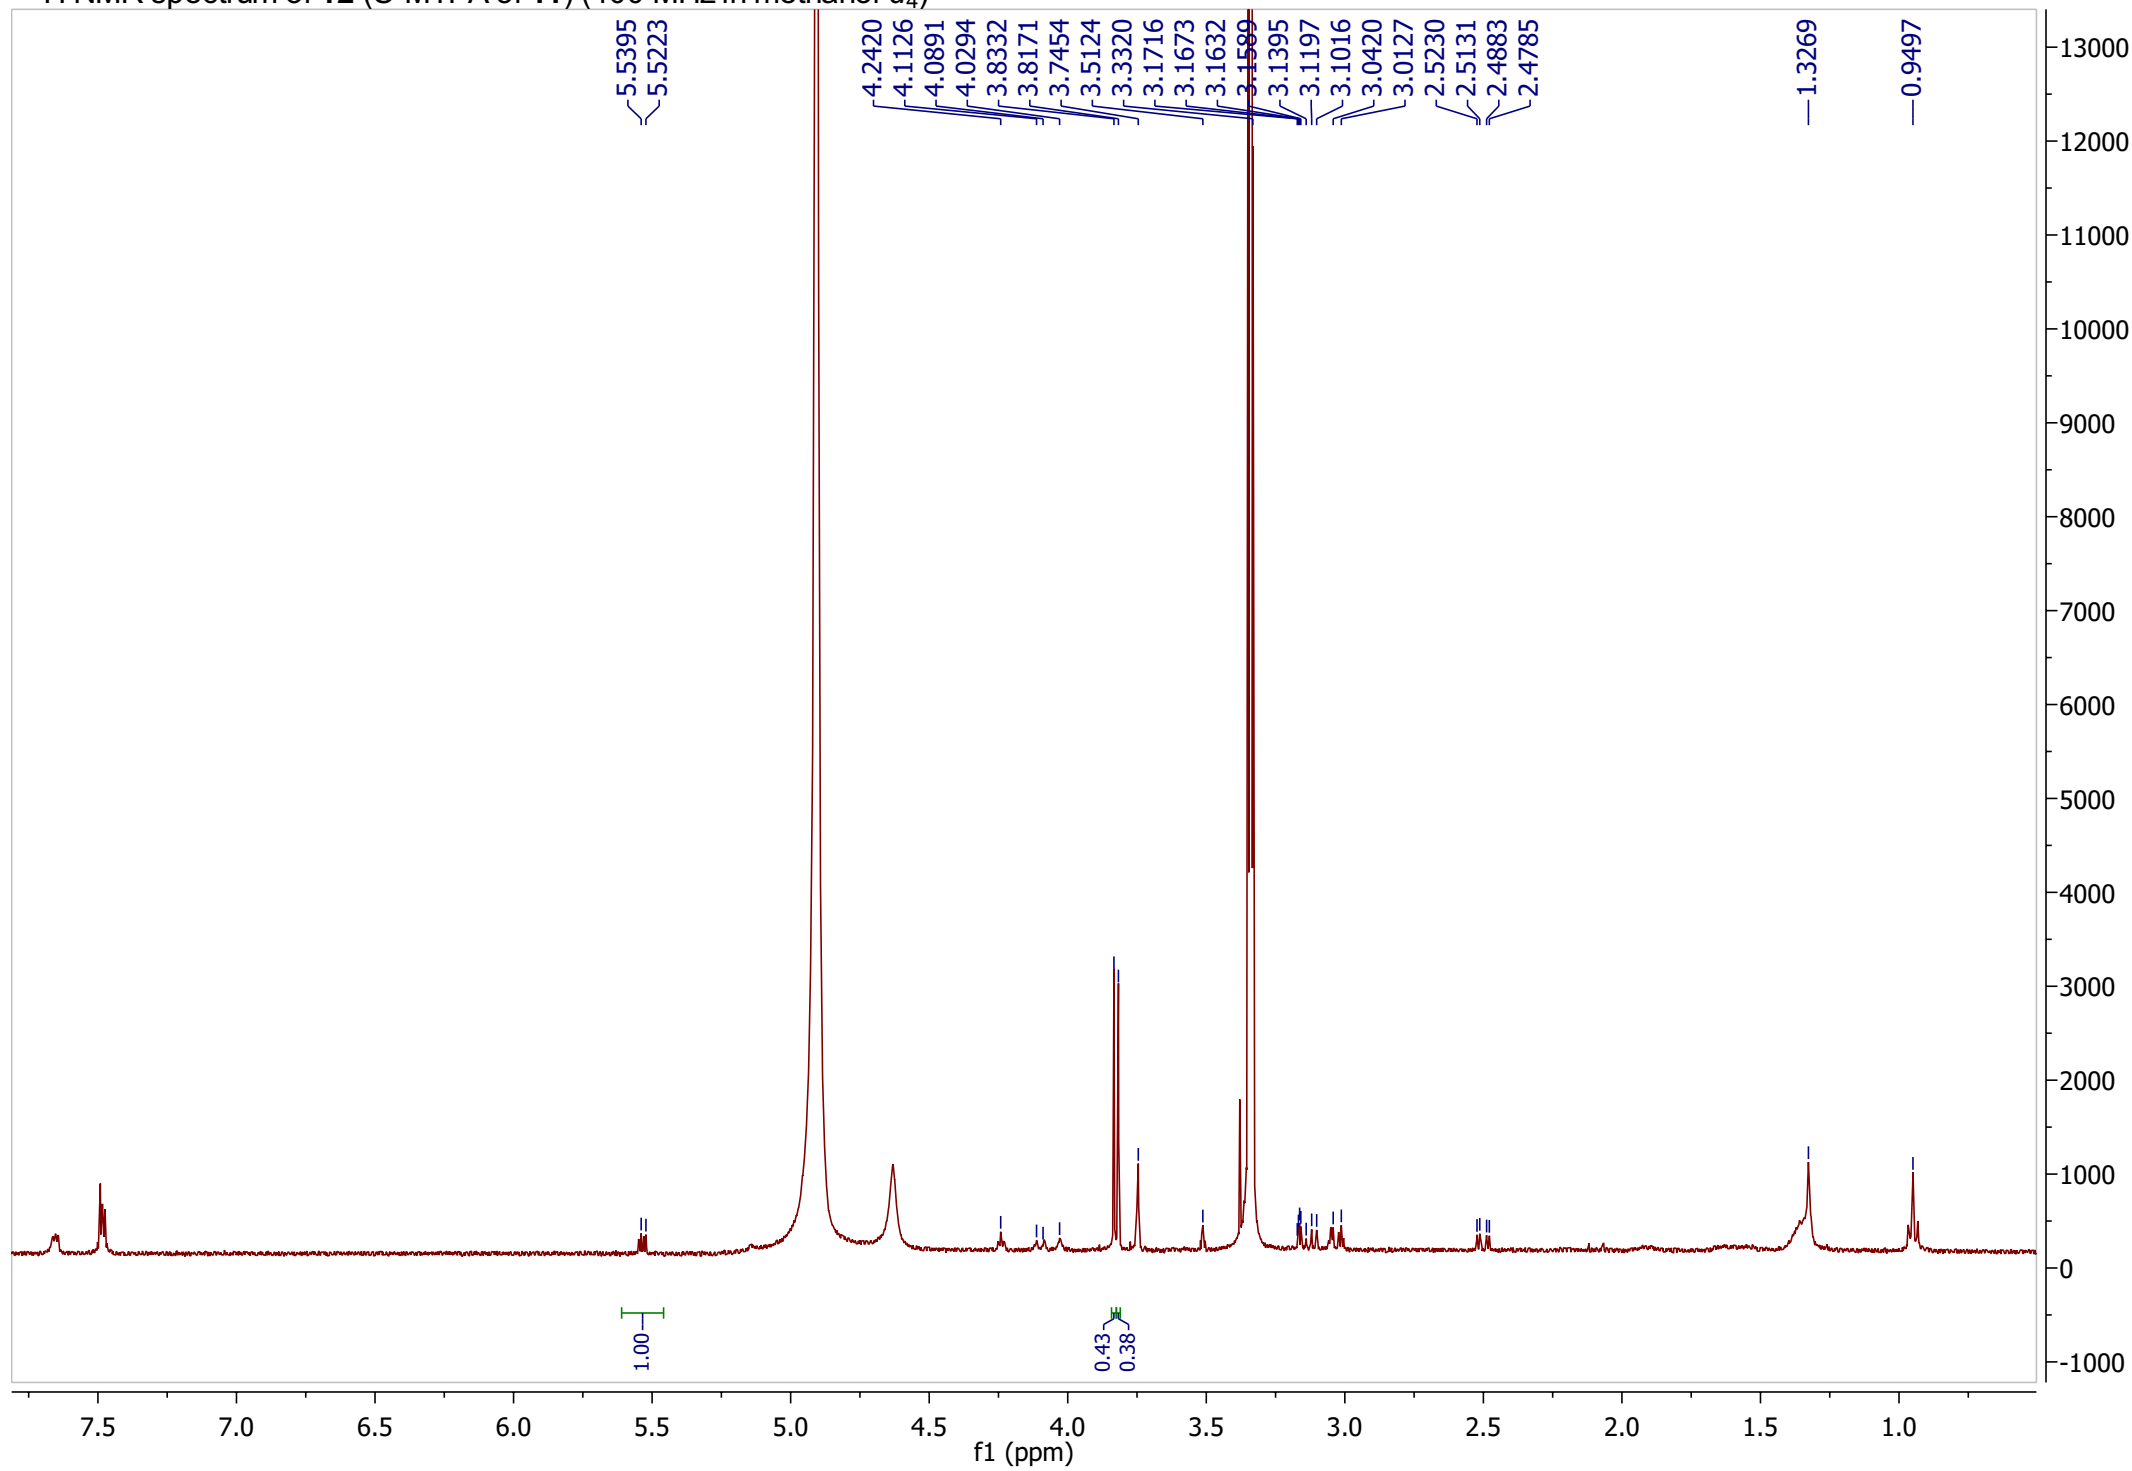

<sup>1</sup>H NMR spectrum of **13** (R-MTPA of **11**) (400 MHz in methanol-*d*<sub>4</sub>)

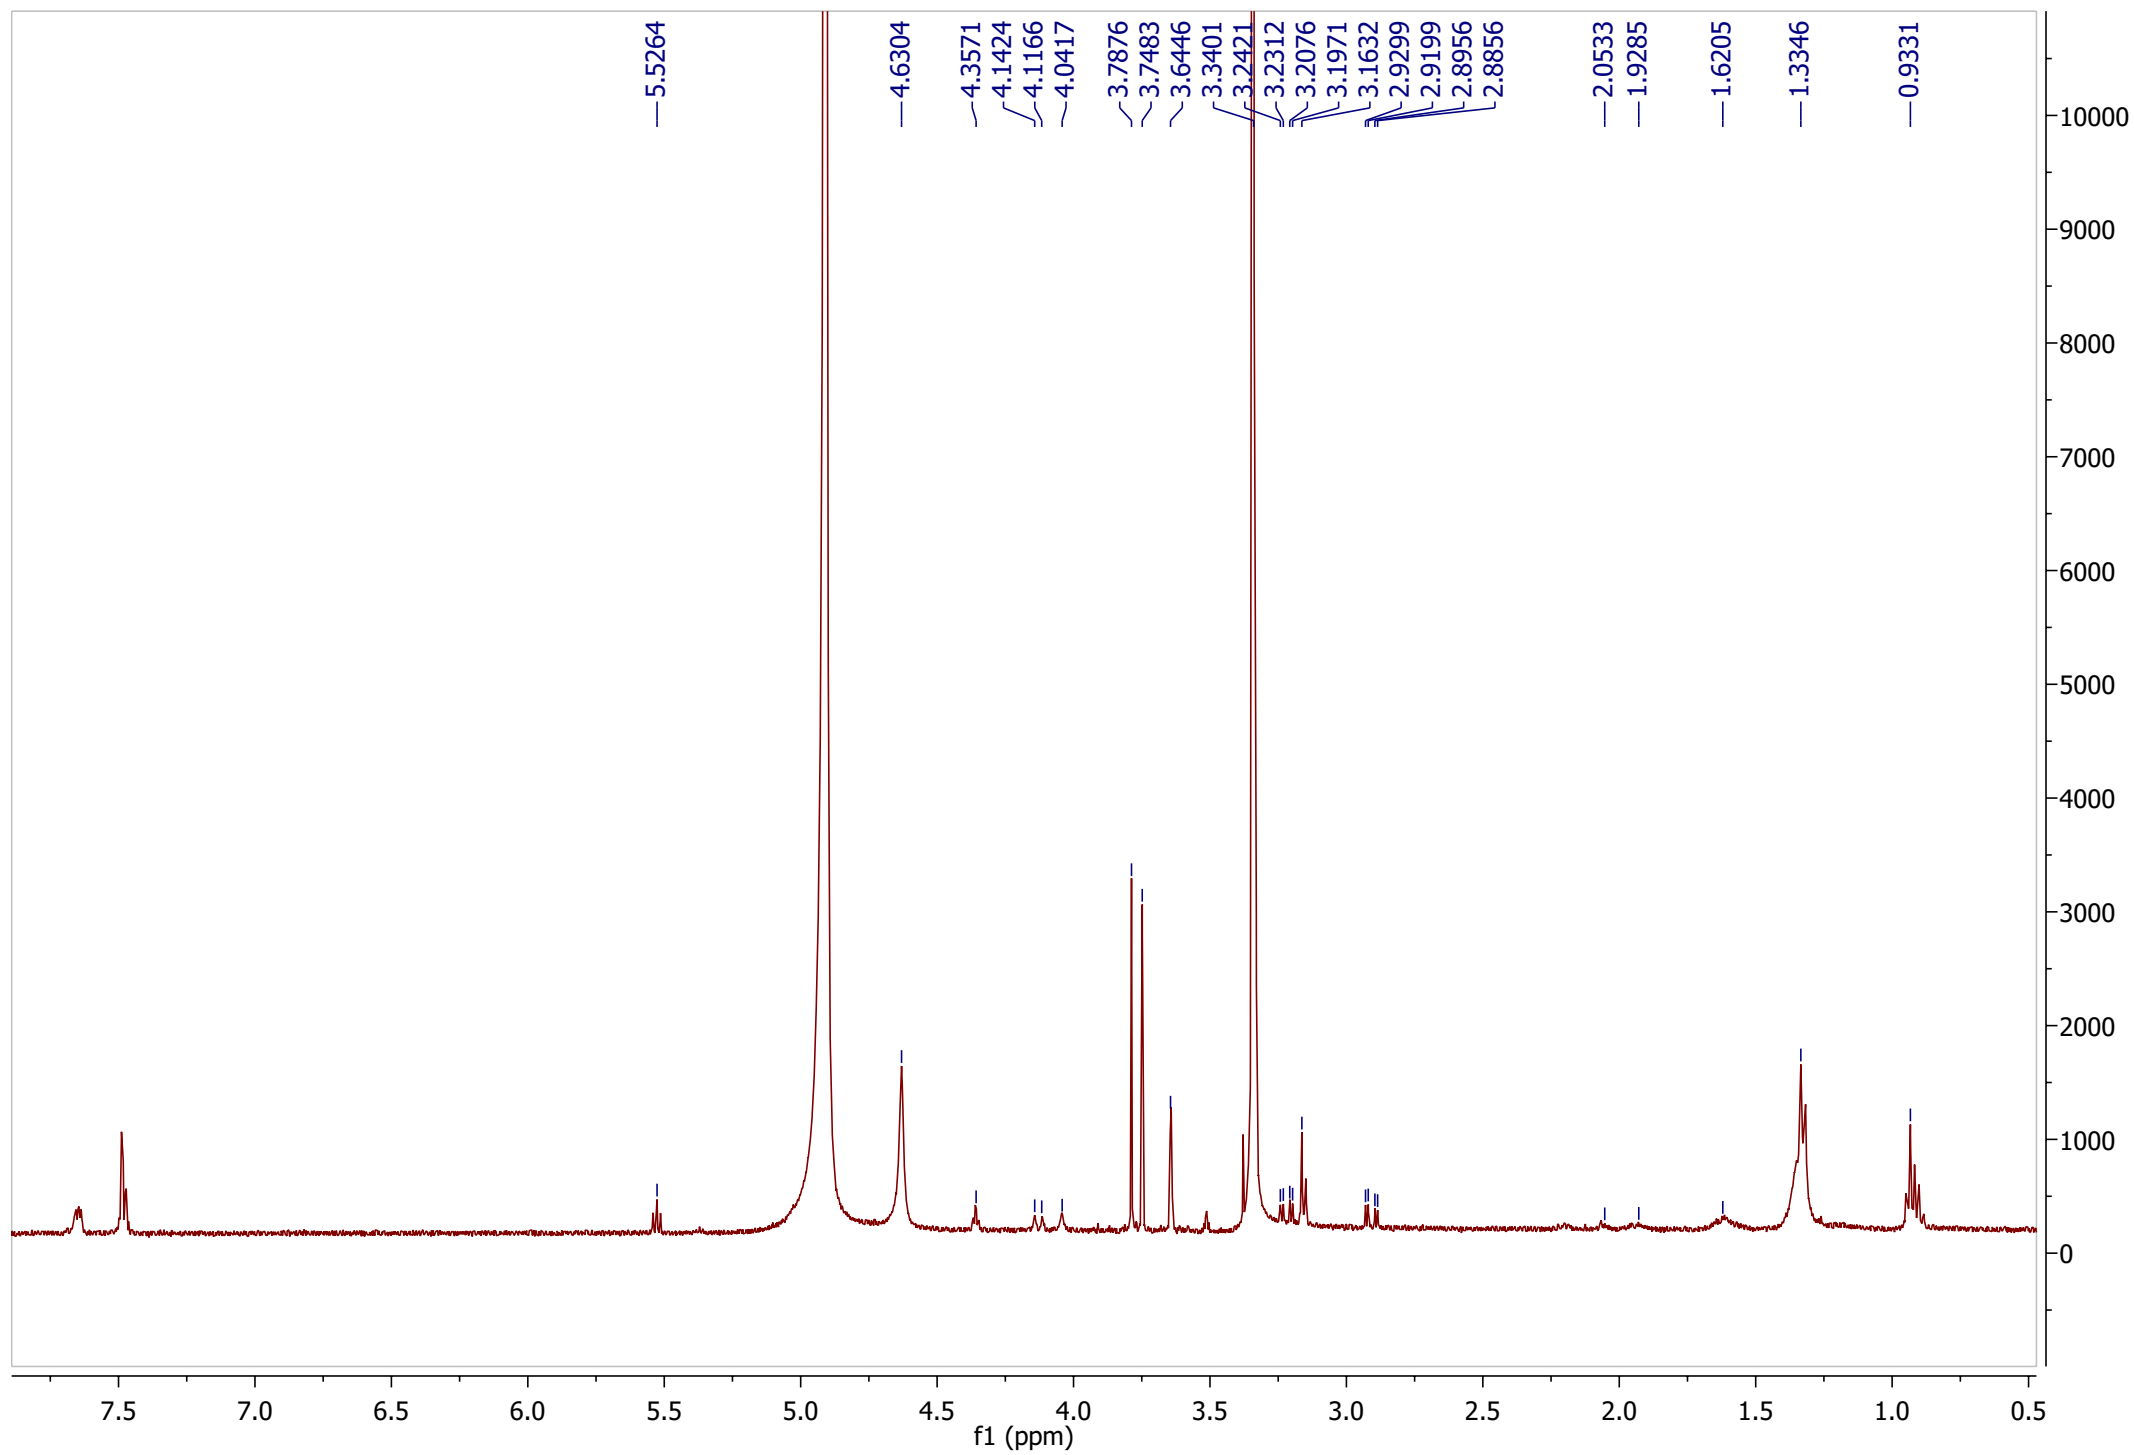

# HRESIMS spectrum of compound 1

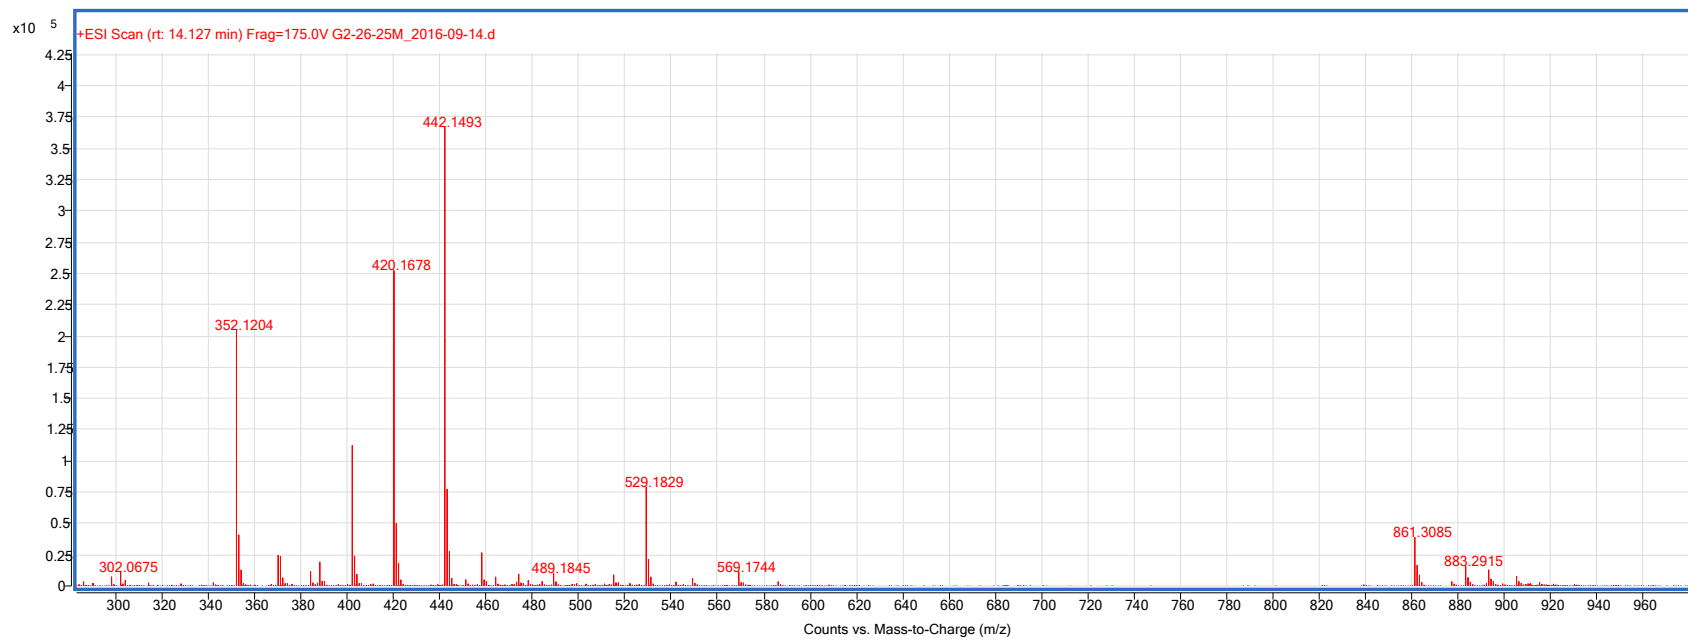



## HRESIMS spectrum of compound 2

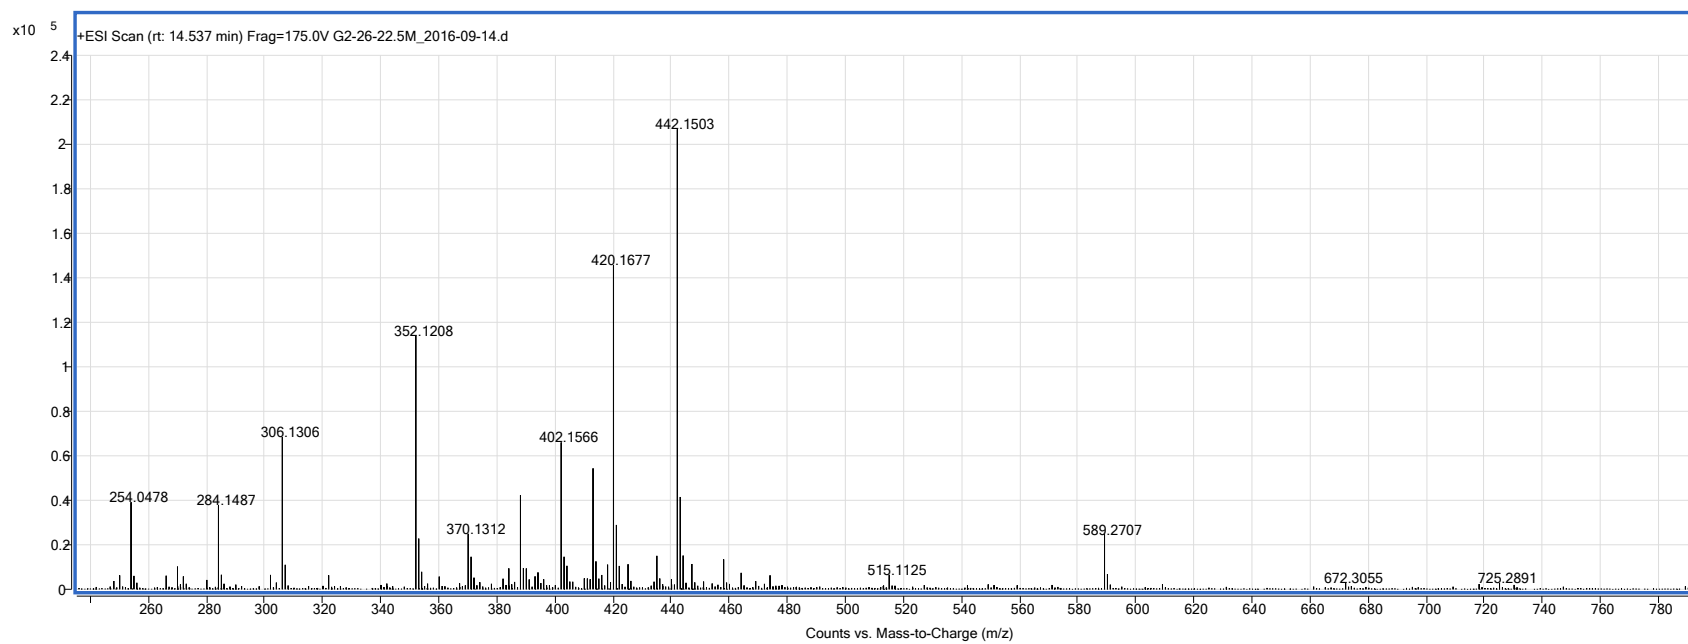

### HRESIMS spectrum of compound 3

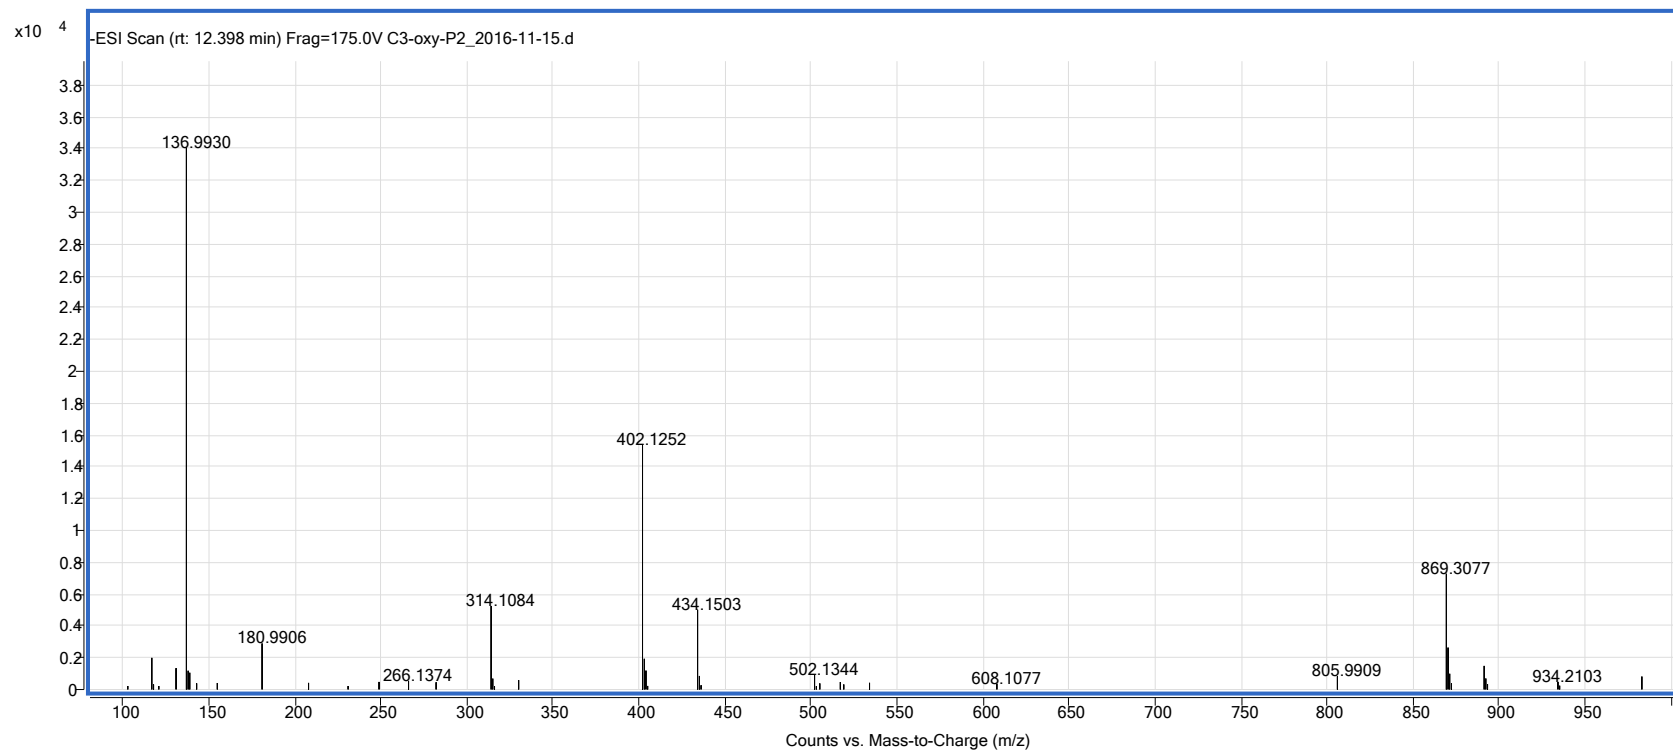

# HRESIMS spectrum of compound 4

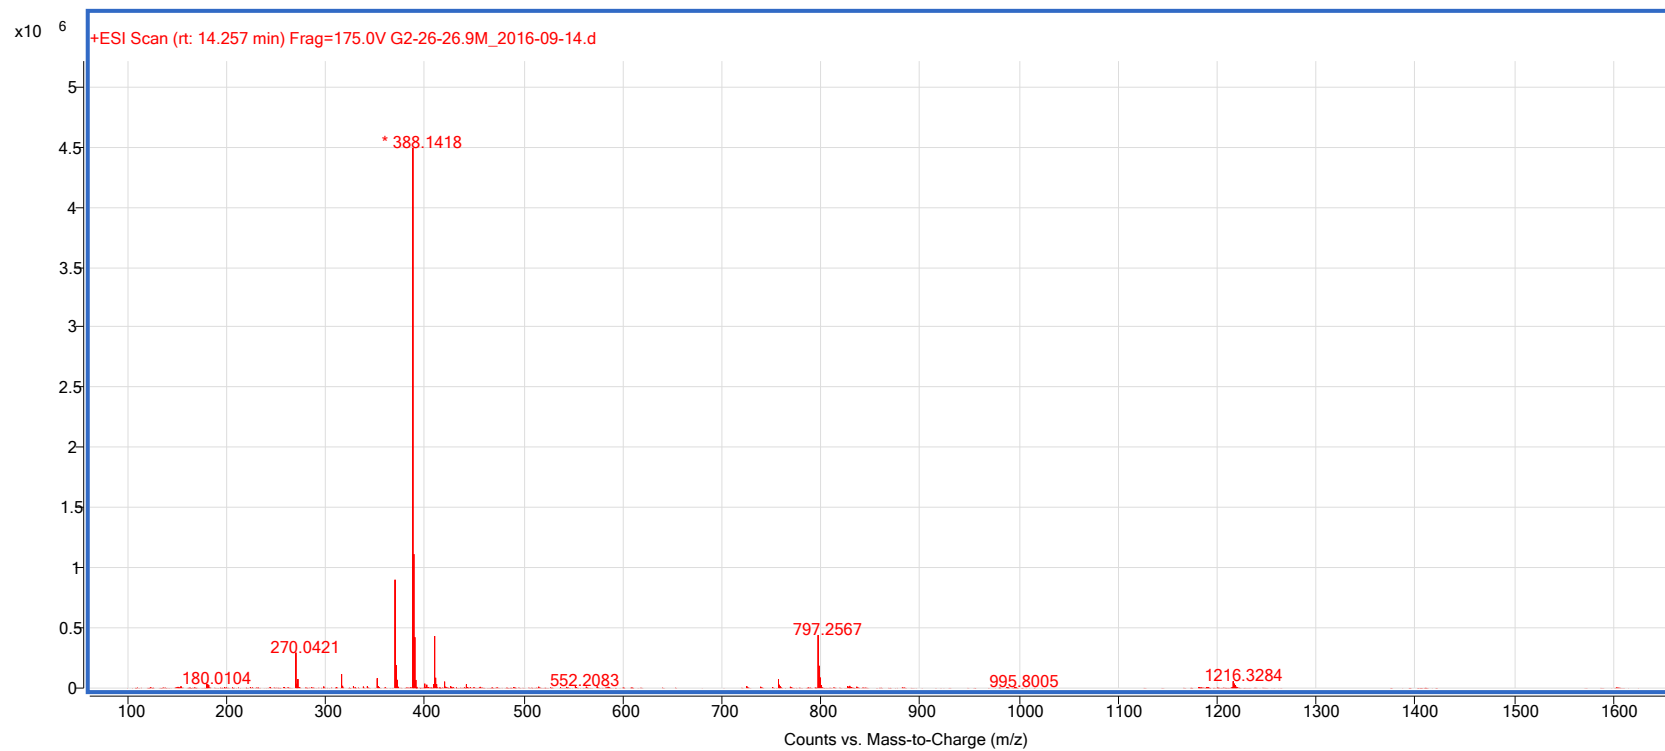

# HRESIMS spectrum of compound 5

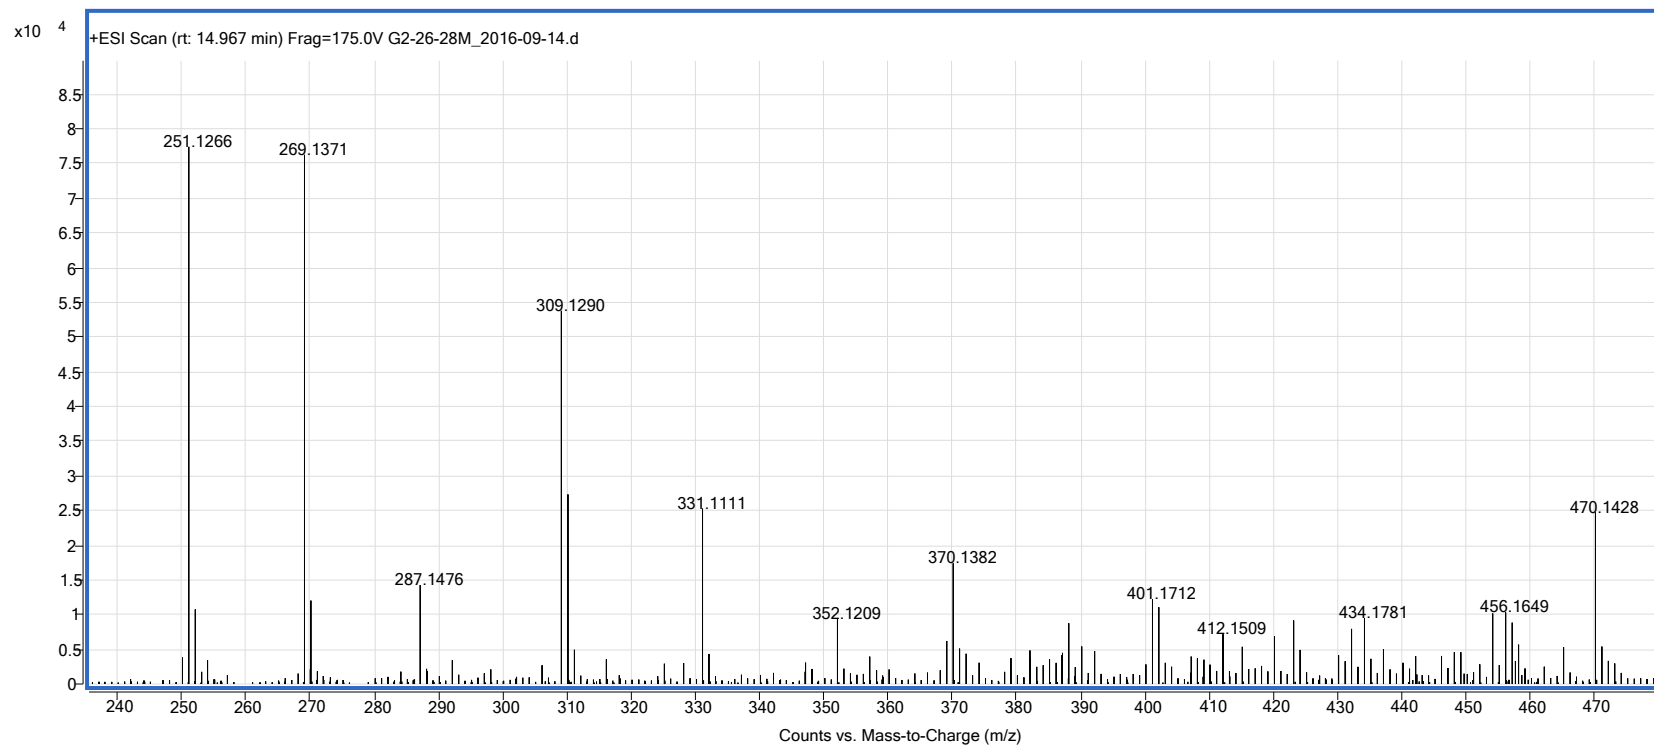

### HRESIMS spectrum of compound **11**

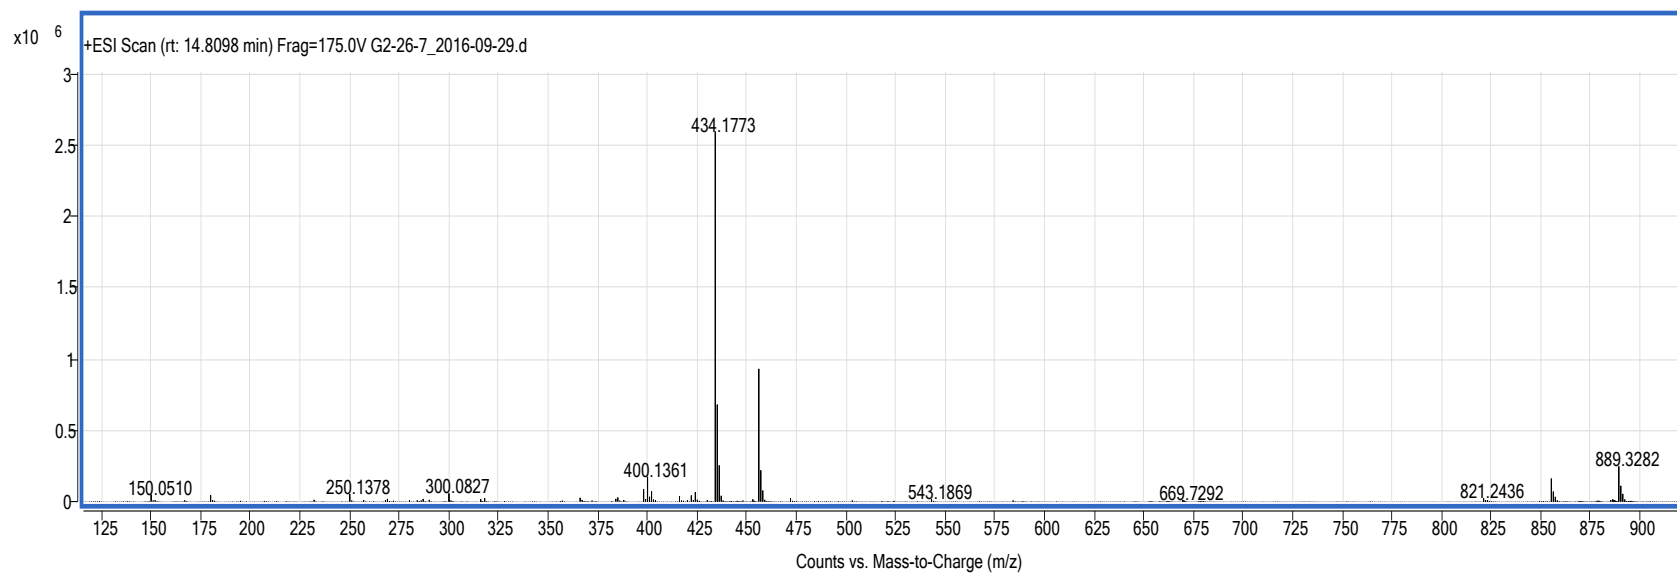

# IR spectrum of compound 1

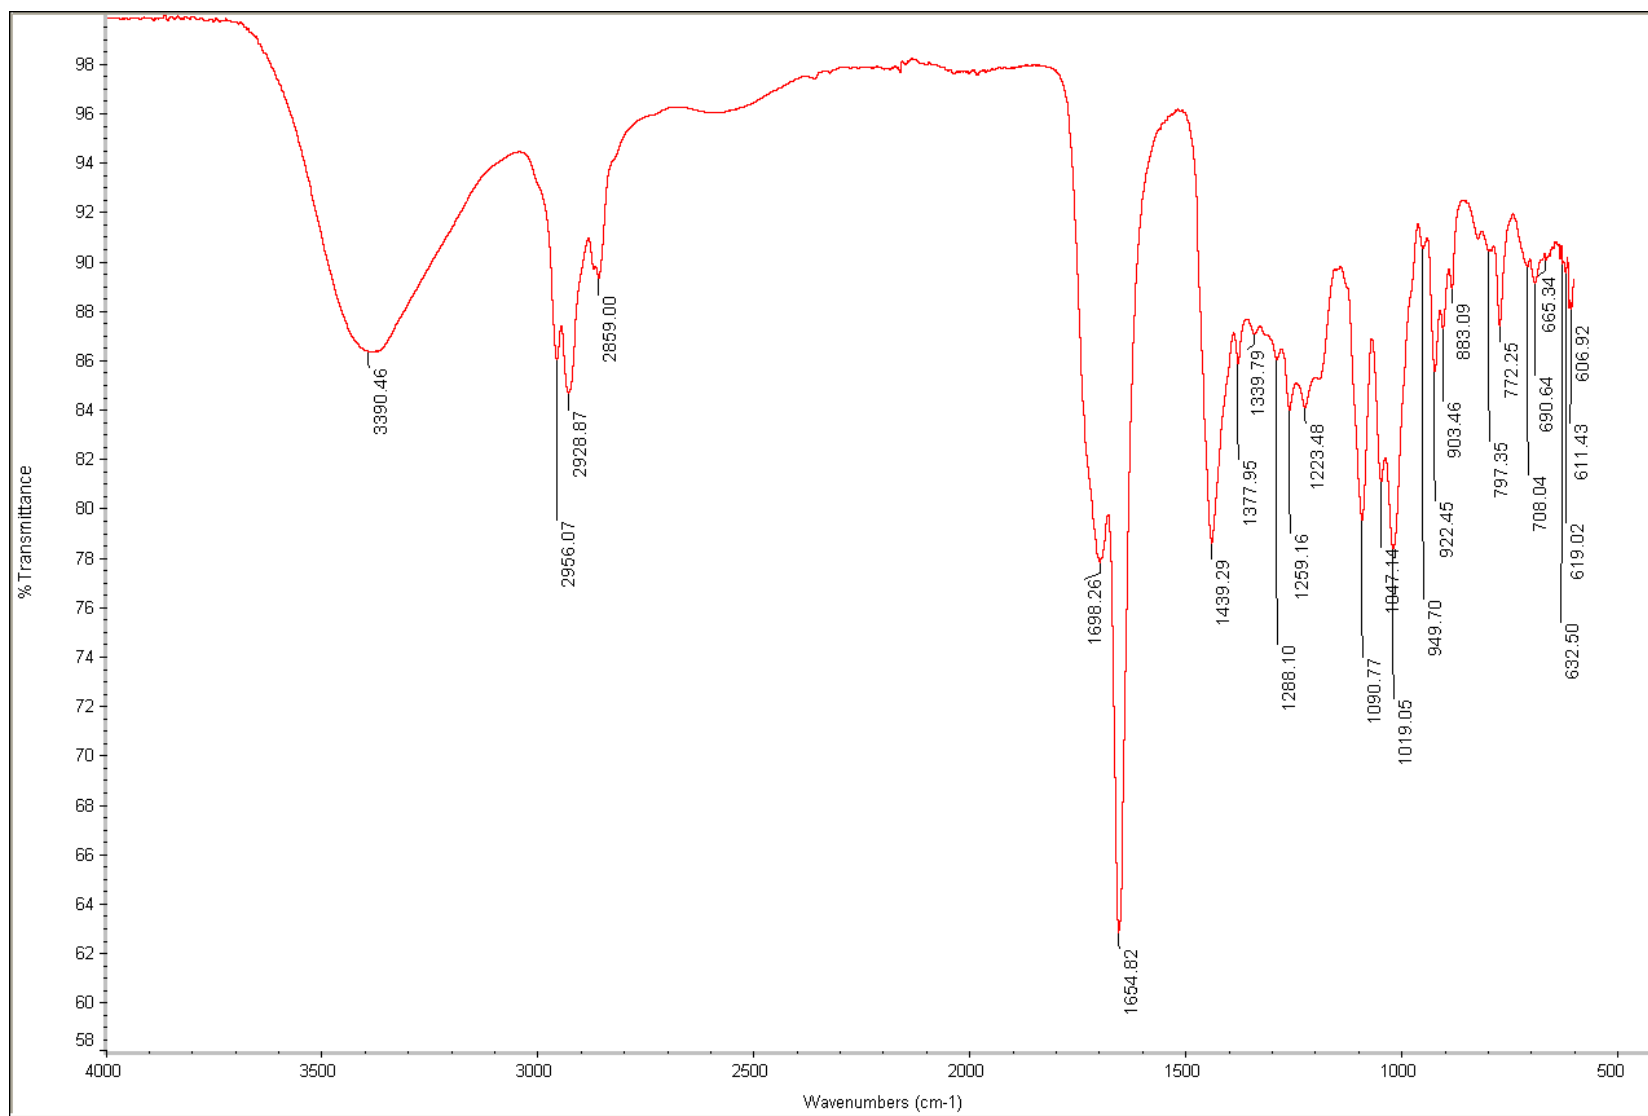

## IR spectrum of compound 2

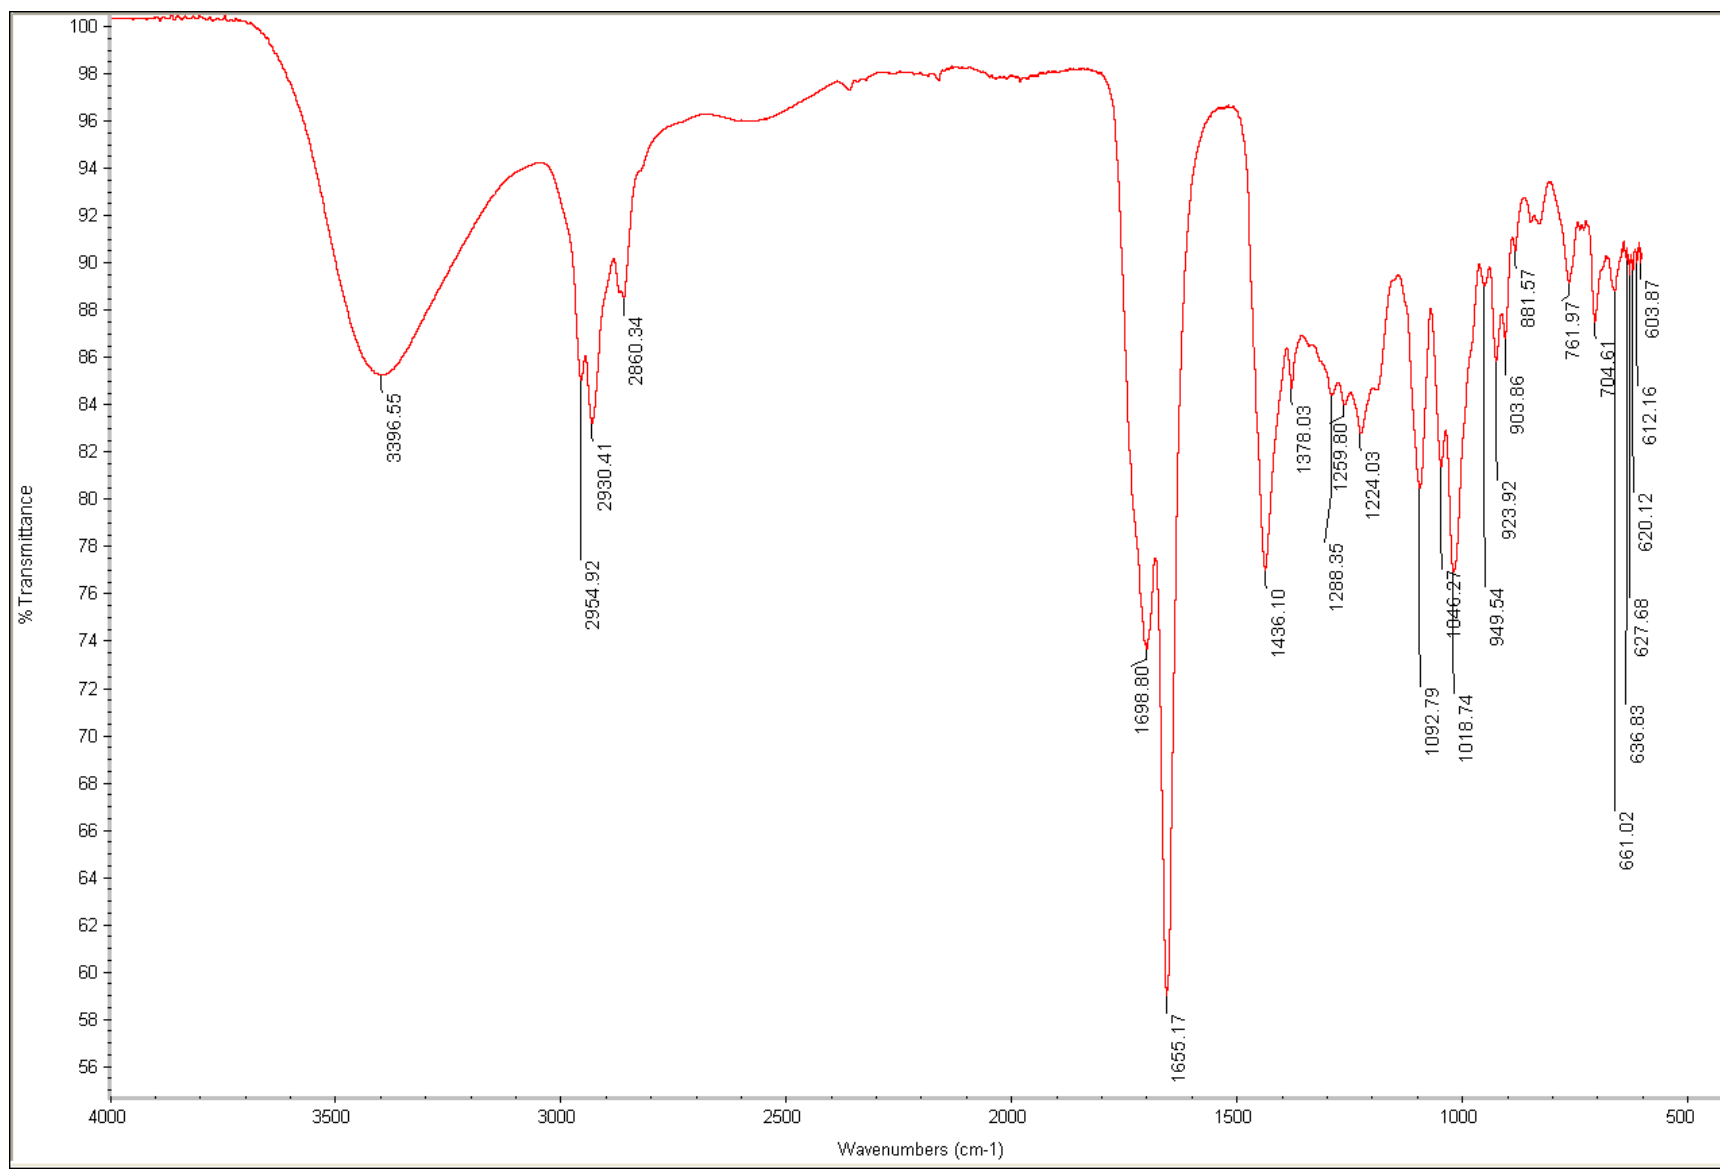

### IR spectrum of compound 3

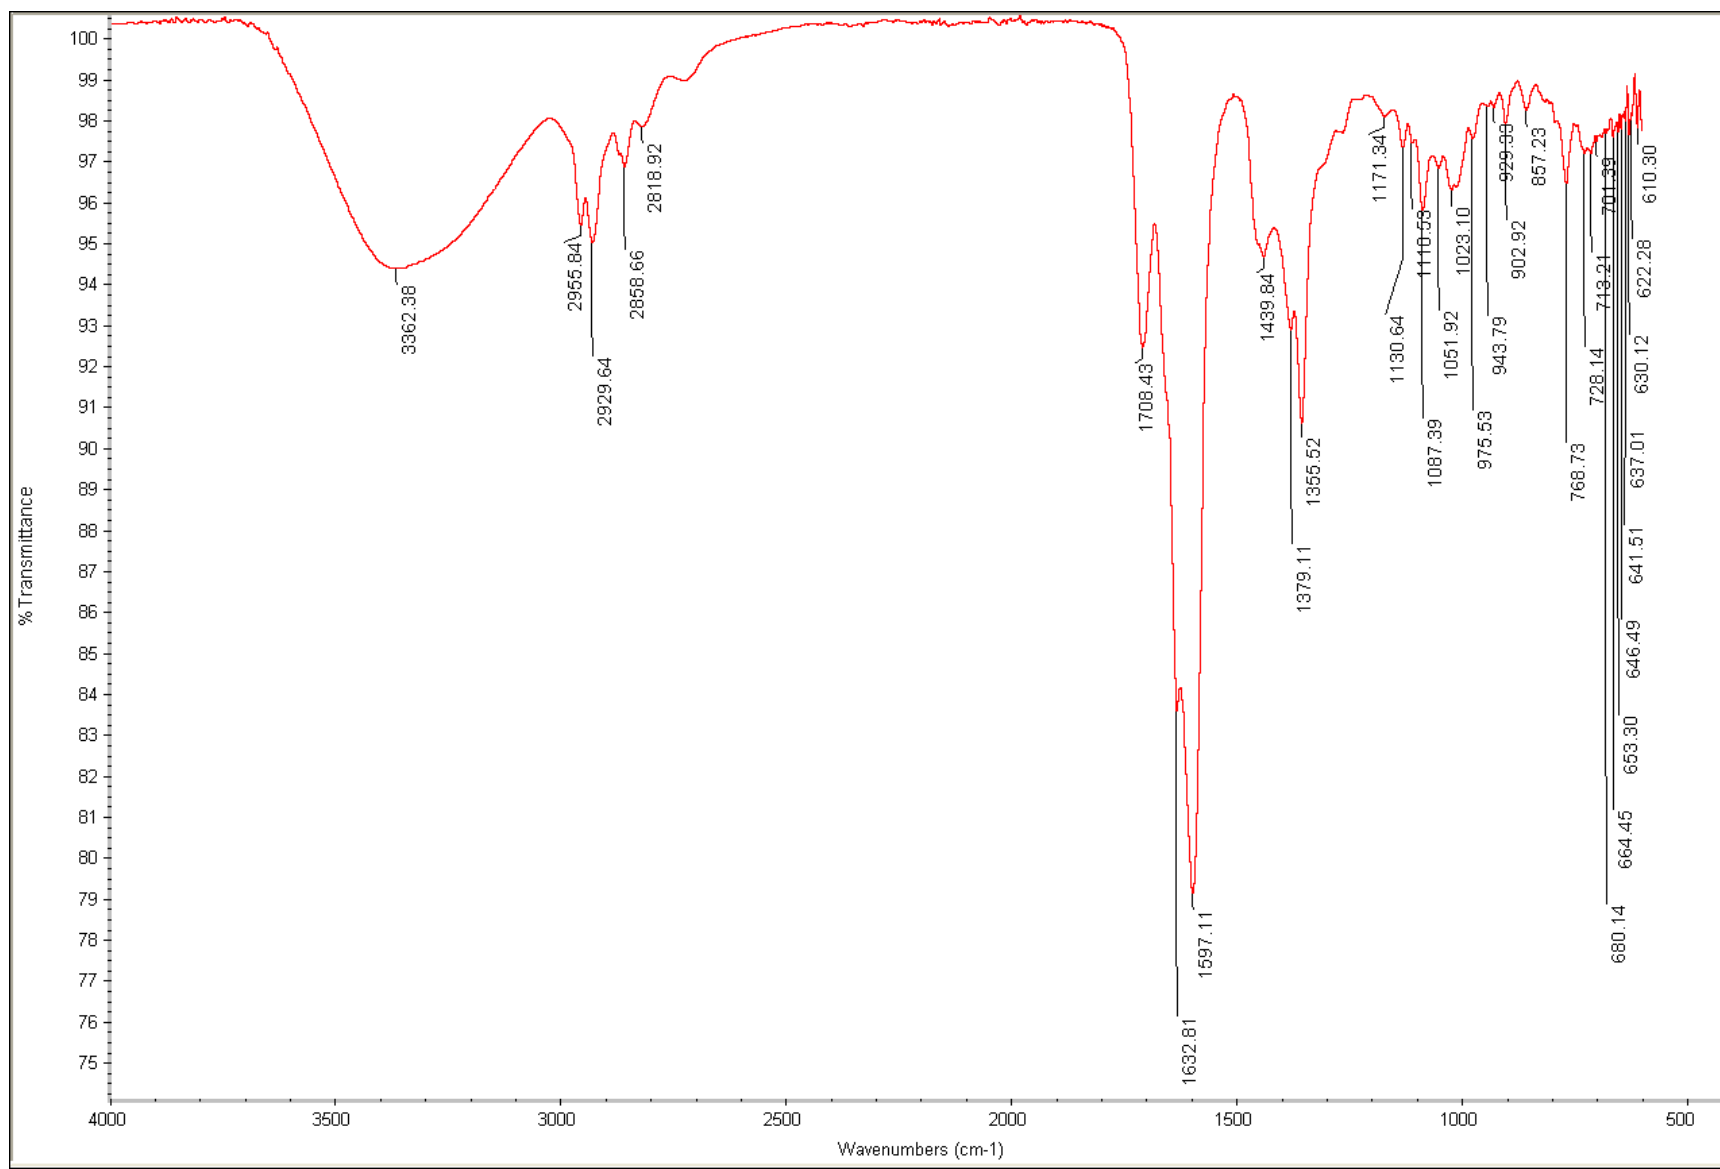



# IR spectrum of compound 4

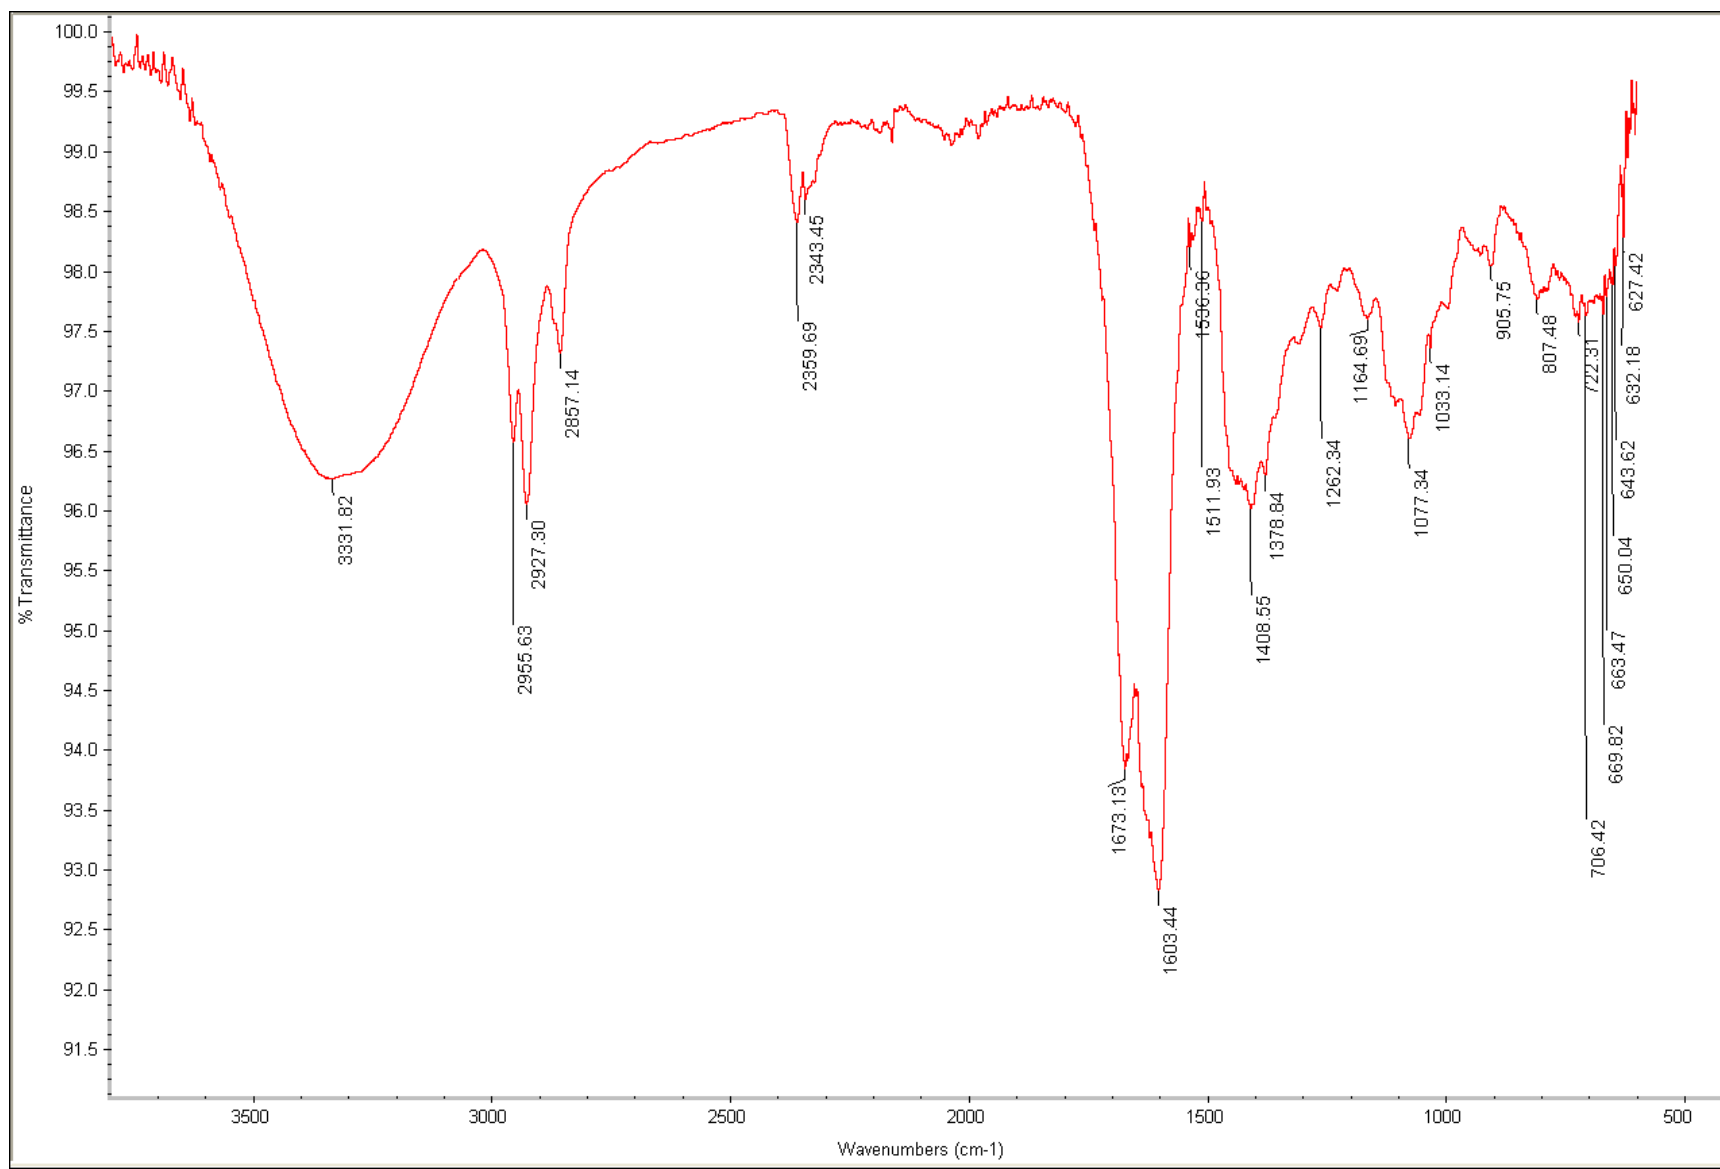

# IR spectrum of compound 5

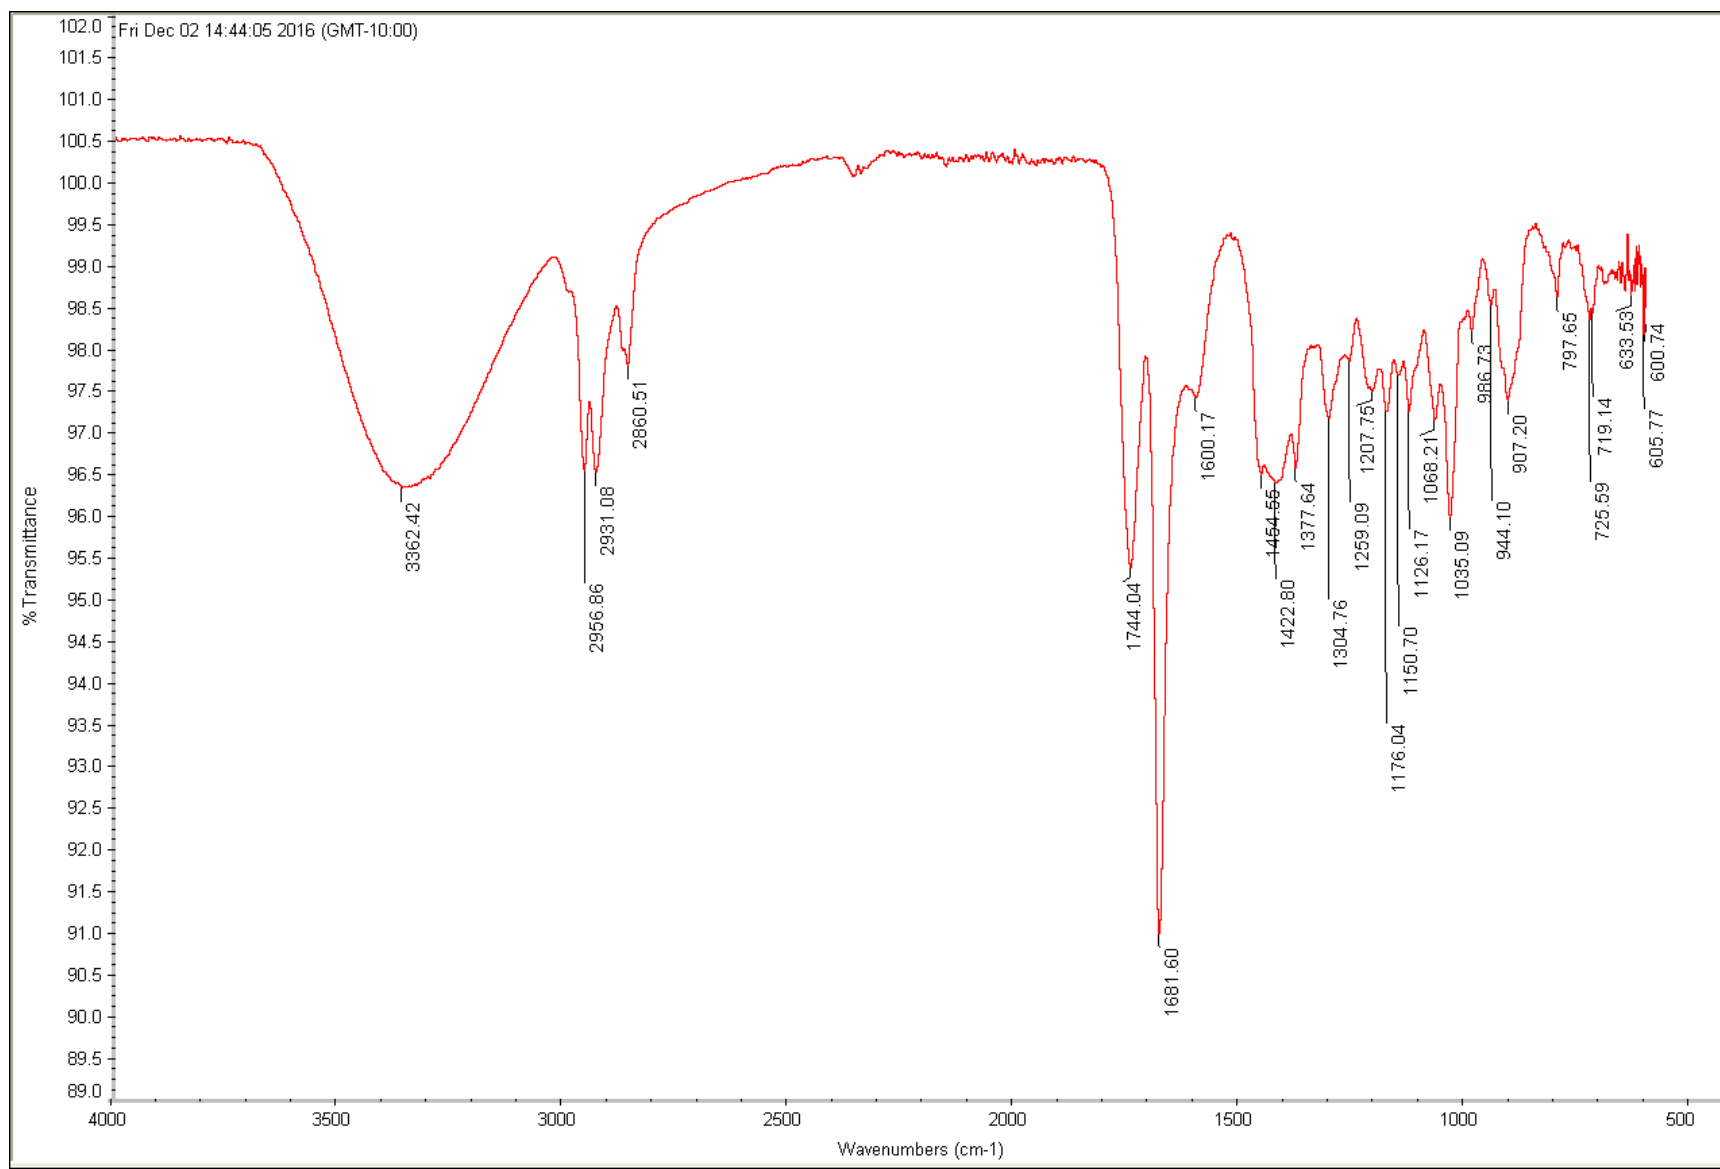

IR spectrum of compound **11**

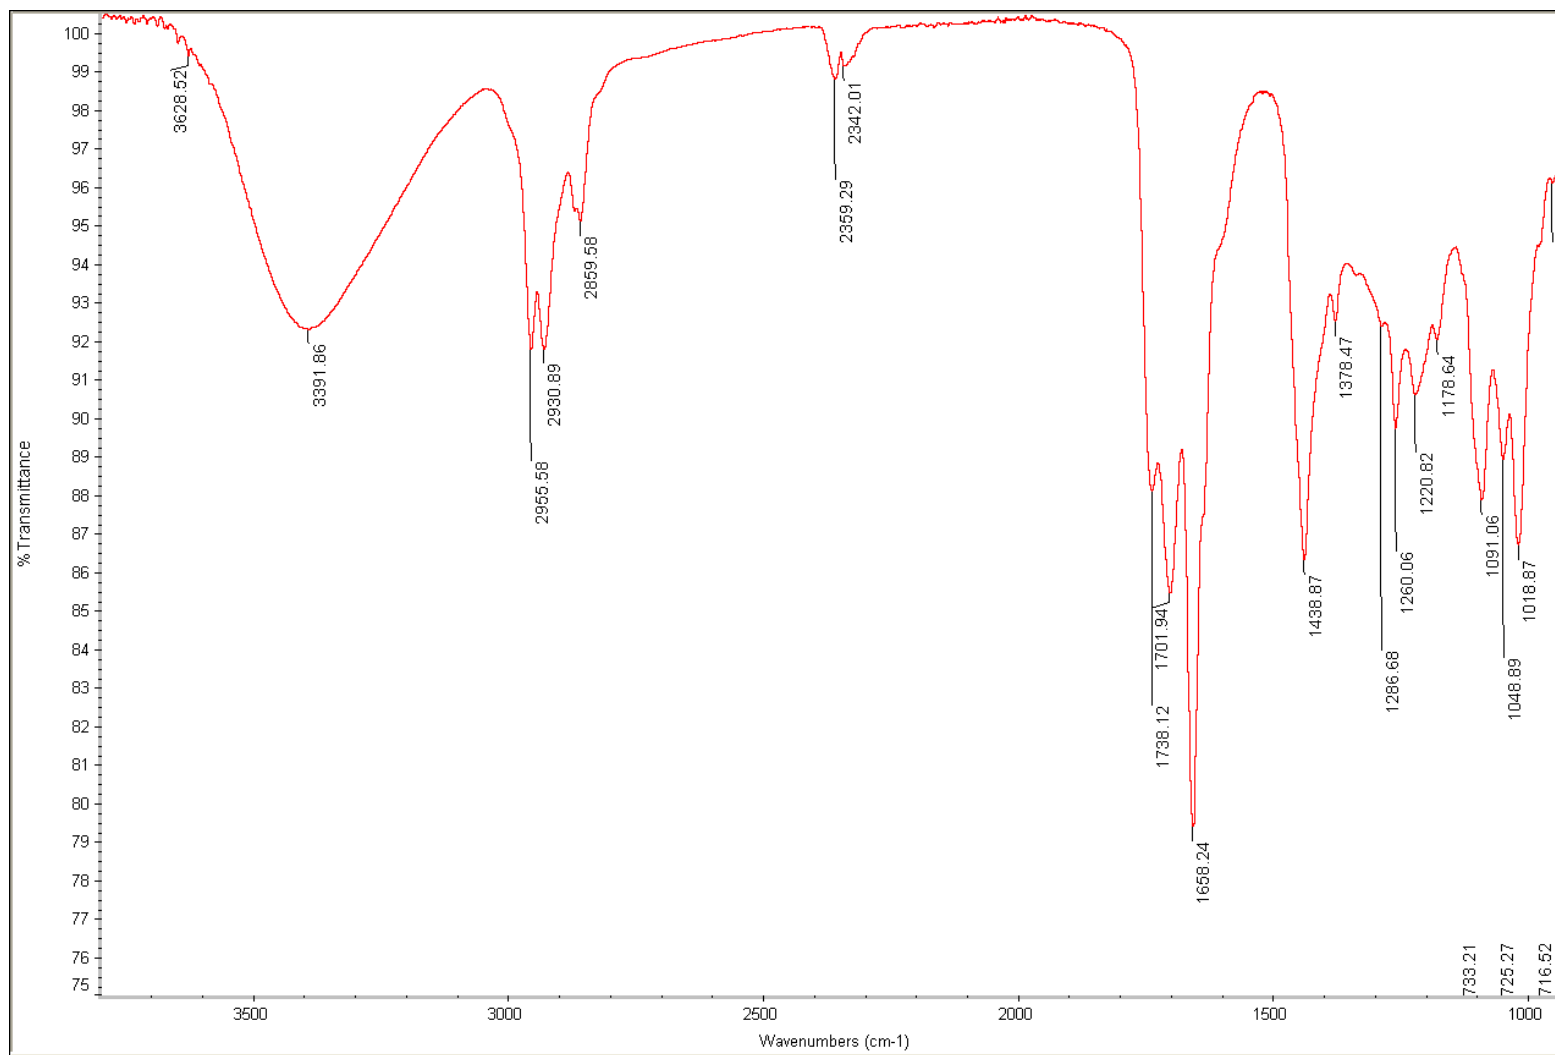

**Table S1.** NMR Boltzmann averaged isotropic magnetic shielding values ( $\sigma$ ), unscaled ( $\delta_u$ ) and scaled ( $\delta_s$ ) chemical shifts calculated at the PCM/mPW1PW91/6-31+G\*\*//PCM/B3LYP/6-31G\* (solvent: MeOH) level of theory for all significantly populated conformers of **1-3R** and **1-3S**.

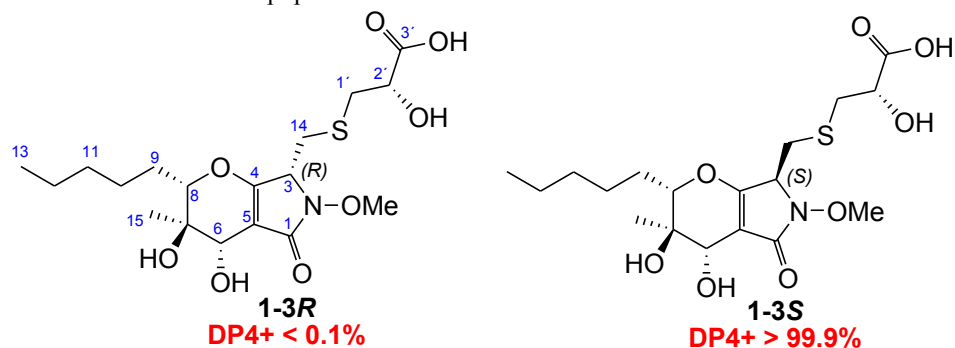

| Atom    | $\delta_{\text{exp}}$ | $\sigma$ |          | $\delta_u$ |            | Unscaled Error<br>(abs[ $\delta_{\text{exp}} - \delta_u$ ]) |             | $\delta_s$ |             | Scaled Error<br>(abs[ $\delta_{\text{exp}} - \delta_s$ ]) |             |
|---------|-----------------------|----------|----------|------------|------------|-------------------------------------------------------------|-------------|------------|-------------|-----------------------------------------------------------|-------------|
|         |                       | 1-3R     | 1-3S     | 1-3R       | 1-3S       | 1-3R                                                        | 1-3S        | 1-3R       | 1-3S        | 1-3R                                                      | 1-3S        |
| C-1     | 175.7                 | 23.8124  | 23.5001  | 173.0      | 173.3      | 2.7                                                         | 2.4         | 175.1      | 175.8       | 0.6                                                       | 0.1         |
| C-2-OMe | 65                    | 131.1340 | 130.9314 | 65.6       | 65.8       | 0.6                                                         | 0.8         | 64.2       | 64.1        | 0.8                                                       | 0.9         |
| C-3     | 62.3                  | 131.9584 | 131.0416 | 64.8       | 65.7       | 2.5                                                         | 3.4         | 63.4       | 64.0        | 1.1                                                       | 1.7         |
| C-4     | 168.6                 | 29.7100  | 29.8394  | 167.1      | 166.9      | 1.5                                                         | 1.7         | 169.0      | 169.2       | 0.4                                                       | 0.6         |
| C-5     | 106.6                 | 90.6774  | 90.1192  | 106.1      | 106.7      | 0.5                                                         | 0.1         | 106.0      | 106.5       | 0.6                                                       | 0.1         |
| C-6     | 66.6                  | 123.1411 | 127.7651 | 73.6       | 69.0       | 7.0                                                         | 2.4         | 72.5       | 67.4        | 5.9                                                       | 0.8         |
| C-7     | 72.8                  | 122.7622 | 120.5333 | 74.0       | 76.2       | 1.2                                                         | 3.4         | 72.9       | 74.9        | 0.1                                                       | 2.1         |
| C-8     | 88.7                  | 108.7863 | 107.2456 | 88.0       | 89.5       | 0.7                                                         | 0.8         | 87.3       | 88.7        | 1.4                                                       | 0.0         |
| C-9     | 29.5                  | 166.0610 | 165.0125 | 30.7       | 31.8       | 1.2                                                         | 2.3         | 28.2       | 28.7        | 1.3                                                       | 0.8         |
| C-10    | 28.1                  | 165.9693 | 166.4093 | 30.8       | 30.4       | 2.7                                                         | 2.3         | 28.2       | 27.2        | 0.1                                                       | 0.9         |
| C-11    | 32.7                  | 161.3876 | 161.7262 | 35.4       | 35.1       | 2.7                                                         | 2.4         | 33.0       | 32.1        | 0.3                                                       | 0.6         |
| C-12    | 23.7                  | 169.4222 | 169.7023 | 27.4       | 27.1       | 3.7                                                         | 3.4         | 24.7       | 23.8        | 1.0                                                       | 0.1         |
| C-13    | 14.4                  | 180.1769 | 180.4343 | 16.6       | 16.3       | 2.2                                                         | 1.9         | 13.6       | 12.6        | 0.8                                                       | 1.8         |
| C-14    | 33.6                  | 158.0250 | 159.8961 | 38.8       | 36.9       | 5.2                                                         | 3.3         | 36.5       | 34.0        | 2.9                                                       | 0.4         |
| C-15    | 20.0                  | 181.0685 | 174.7048 | 15.7       | 22.1       | 4.3                                                         | 2.1         | 12.7       | 18.6        | 7.3                                                       | 1.4         |
| C-1'    | 38.4                  | 153.5293 | 152.4577 | 43.2       | 44.3       | 4.8                                                         | 5.9         | 41.1       | 41.7        | 2.7                                                       | 3.3         |
| C-2'    | 72.5                  | 123.5034 | 123.6006 | 73.3       | 73.2       | 0.8                                                         | 0.7         | 72.1       | 71.7        | 0.4                                                       | 0.8         |
| C-3'    | 175.9                 | 24.0218  | 25.2190  | 172.8      | 171.6      | 3.1                                                         | 4.3         | 174.8      | 174.0       | 1.1                                                       | 1.9         |
|         |                       |          |          |            | <b>MAE</b> | <b>2.6</b>                                                  | <b>2.4</b>  |            | <b>CMAE</b> | <b>1.6</b>                                                | <b>1.0</b>  |
| H-2-OMe | 3.86                  | 27.6149  | 27.6453  | 3.94       | 3.91       | 0.08                                                        | 0.05        | 3.82       | 3.88        | 0.04                                                      | 0.02        |
| H-3     | 4.42                  | 27.2243  | 27.3386  | 4.33       | 4.21       | 0.09                                                        | 0.21        | 4.19       | 4.18        | 0.23                                                      | 0.24        |
| H-6     | 4.02                  | 26.8670  | 27.3352  | 4.68       | 4.22       | 0.66                                                        | 0.20        | 4.52       | 4.18        | 0.50                                                      | 0.16        |
| H-8     | 4.10                  | 27.4749  | 27.2540  | 4.08       | 4.30       | 0.02                                                        | 0.20        | 3.95       | 4.26        | 0.15                                                      | 0.16        |
| H-9a    | 1.93                  | 29.6440  | 29.3996  | 1.91       | 2.15       | 0.02                                                        | 0.22        | 1.91       | 2.16        | 0.02                                                      | 0.23        |
| H-9b    | 1.60                  | 29.8971  | 30.0588  | 1.65       | 1.49       | 0.05                                                        | 0.11        | 1.67       | 1.51        | 0.07                                                      | 0.09        |
| H-10a   | 1.60                  | 29.8380  | 29.9079  | 1.71       | 1.64       | 0.11                                                        | 0.04        | 1.73       | 1.66        | 0.13                                                      | 0.06        |
| H-10b   | 1.37                  | 30.3328  | 30.3318  | 1.22       | 1.22       | 0.15                                                        | 0.15        | 1.26       | 1.25        | 0.11                                                      | 0.12        |
| H-11    | 1.35                  | 30.2660  | 30.3501  | 1.28       | 1.20       | 0.07                                                        | 0.15        | 1.32       | 1.23        | 0.03                                                      | 0.12        |
| H-12    | 1.36                  | 30.2109  | 30.2393  | 1.34       | 1.31       | 0.02                                                        | 0.05        | 1.38       | 1.34        | 0.02                                                      | 0.02        |
| H-13    | 0.91                  | 30.6189  | 30.6641  | 0.93       | 0.89       | 0.02                                                        | 0.02        | 0.99       | 0.92        | 0.08                                                      | 0.01        |
| H-14    | 3.18                  | 28.4127  | 28.3619  | 3.14       | 3.19       | 0.04                                                        | 0.01        | 3.07       | 3.18        | 0.11                                                      | 0.00        |
| H-15    | 1.31                  | 30.4426  | 30.1350  | 1.11       | 1.42       | 0.20                                                        | 0.11        | 1.16       | 1.44        | 0.15                                                      | 0.13        |
| H-1'    | 2.94                  | 28.5211  | 28.7722  | 3.03       | 2.78       | 0.09                                                        | 0.16        | 2.97       | 2.78        | 0.03                                                      | 0.16        |
| H-2'    | 4.34                  | 27.0490  | 27.1919  | 4.50       | 4.36       | 0.16                                                        | 0.02        | 4.35       | 4.32        | 0.01                                                      | 0.02        |
|         |                       |          |          |            | <b>MAE</b> | <b>0.12</b>                                                 | <b>0.11</b> |            | <b>CMAE</b> | <b>0.11</b>                                               | <b>0.10</b> |

**Table S2.** NMR Boltzmann averaged isotropic magnetic shielding values ( $\sigma$ ), unscaled ( $\delta_u$ ) and scaled ( $\delta_s$ ) chemical shifts calculated at the PCM/mPW1PW91/6-31+G\*\*//PCM/B3LYP/6-31G\* (solvent: MeOH) level of theory for all significantly populated conformers of **2-3R** and **2-3S**.

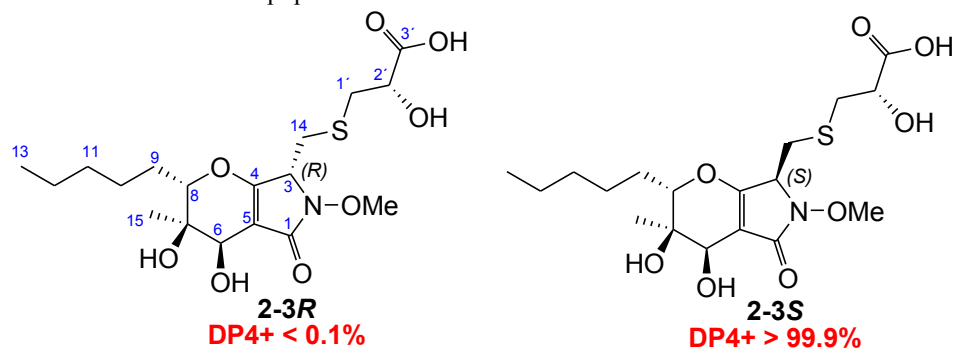

| Atom    | $\delta_{\text{exp}}$ | $\sigma$ |          | $\delta_u$ |            | Unscaled Error<br>( $\text{abs}[\delta_{\text{exp}} - \delta_u]$ ) |             | $\delta_s$ |             | Scaled Error<br>( $\text{abs}[\delta_{\text{exp}} - \delta_s]$ ) |             |
|---------|-----------------------|----------|----------|------------|------------|--------------------------------------------------------------------|-------------|------------|-------------|------------------------------------------------------------------|-------------|
|         |                       | 2-3R     | 2-3S     | 2-3R       | 2-3S       | 2-3R                                                               | 2-3S        | 2-3R       | 2-3S        | 2-3R                                                             | 2-3S        |
| C-1     | 174.4                 | 23.4424  | 25.2218  | 173.3      | 171.6      | 1.1                                                                | 2.8         | 175.1      | 174.2       | 0.7                                                              | 0.2         |
| C-2-OMe | 64.9                  | 131.1884 | 131.4106 | 65.6       | 65.4       | 0.7                                                                | 0.5         | 64.1       | 64.1        | 0.8                                                              | 0.8         |
| C-3     | 61.8                  | 131.4890 | 132.5861 | 65.3       | 64.2       | 3.5                                                                | 2.4         | 63.8       | 62.9        | 2.0                                                              | 1.1         |
| C-4     | 168.4                 | 26.5264  | 29.2157  | 170.3      | 167.6      | 1.9                                                                | 0.8         | 171.9      | 170.1       | 3.5                                                              | 1.7         |
| C-5     | 107.6                 | 90.5787  | 91.1411  | 106.2      | 105.6      | 1.4                                                                | 2.0         | 105.9      | 105.9       | 1.7                                                              | 1.7         |
| C-6     | 68.2                  | 129.1848 | 129.9190 | 67.6       | 66.9       | 0.6                                                                | 1.3         | 66.2       | 65.6        | 2.0                                                              | 2.6         |
| C-7     | 72.4                  | 125.5052 | 123.0531 | 71.3       | 73.7       | 1.1                                                                | 1.3         | 69.9       | 72.8        | 2.5                                                              | 0.4         |
| C-8     | 88.3                  | 111.7136 | 109.3985 | 85.1       | 87.4       | 3.2                                                                | 0.9         | 84.2       | 86.9        | 4.1                                                              | 1.4         |
| C-9     | 29.0                  | 165.7895 | 164.8904 | 31.0       | 31.9       | 2.0                                                                | 2.9         | 28.4       | 29.4        | 0.6                                                              | 0.4         |
| C-10    | 27.6                  | 165.8398 | 166.2538 | 30.9       | 30.5       | 3.3                                                                | 2.9         | 28.4       | 27.9        | 0.8                                                              | 0.3         |
| C-11    | 32.7                  | 161.4149 | 161.6138 | 35.4       | 35.2       | 2.7                                                                | 2.5         | 33.0       | 32.8        | 0.3                                                              | 0.1         |
| C-12    | 23.6                  | 169.4214 | 169.6266 | 27.4       | 27.2       | 3.8                                                                | 3.6         | 24.7       | 24.4        | 1.1                                                              | 0.8         |
| C-13    | 14.4                  | 180.1837 | 180.4248 | 16.6       | 16.4       | 2.2                                                                | 2.0         | 13.6       | 13.2        | 0.8                                                              | 1.2         |
| C-14    | 33.1                  | 157.0026 | 160.6738 | 39.8       | 36.1       | 6.7                                                                | 3.0         | 37.5       | 33.7        | 4.4                                                              | 0.6         |
| C-15    | 20.0                  | 176.6961 | 174.8124 | 20.1       | 22.0       | 0.1                                                                | 2.0         | 17.2       | 19.1        | 2.8                                                              | 0.9         |
| C-1'    | 38.3                  | 152.9430 | 152.3963 | 43.8       | 44.4       | 5.5                                                                | 6.1         | 41.7       | 42.3        | 3.4                                                              | 4.0         |
| C-2'    | 72.2                  | 123.2263 | 124.5835 | 73.6       | 72.2       | 1.4                                                                | 0.0         | 72.3       | 71.2        | 0.1                                                              | 1.0         |
| C-3'    | 175.9                 | 23.6376  | 23.1214  | 173.1      | 173.7      | 2.8                                                                | 2.2         | 174.9      | 176.4       | 1.0                                                              | 0.5         |
|         |                       |          |          |            | <b>MAE</b> | <b>2.4</b>                                                         | <b>2.2</b>  |            | <b>CMAE</b> | <b>1.8</b>                                                       | <b>1.1</b>  |
| H-2-OMe | 3.82                  | 27.6124  | 27.6871  | 3.94       | 3.86       | 0.12                                                               | 0.04        | 3.88       | 3.80        | 0.06                                                             | 0.02        |
| H-3     | 4.48                  | 27.2339  | 27.1905  | 4.32       | 4.36       | 0.16                                                               | 0.12        | 4.24       | 4.27        | 0.24                                                             | 0.21        |
| H-6     | 4.17                  | 27.3517  | 27.0902  | 4.20       | 4.46       | 0.03                                                               | 0.29        | 4.13       | 4.37        | 0.04                                                             | 0.20        |
| H-8     | 4.04                  | 27.4521  | 27.2938  | 4.10       | 4.26       | 0.06                                                               | 0.22        | 4.03       | 4.17        | 0.01                                                             | 0.13        |
| H-9a    | 1.80                  | 29.6499  | 29.9128  | 1.90       | 1.64       | 0.10                                                               | 0.16        | 1.91       | 1.70        | 0.11                                                             | 0.10        |
| H-9b    | 1.73                  | 29.9741  | 30.0609  | 1.58       | 1.49       | 0.15                                                               | 0.24        | 1.60       | 1.56        | 0.13                                                             | 0.17        |
| H-10a   | 1.58                  | 29.8575  | 30.0035  | 1.69       | 1.55       | 0.11                                                               | 0.03        | 1.71       | 1.61        | 0.13                                                             | 0.03        |
| H-10b   | 1.37                  | 30.2772  | 30.2671  | 1.27       | 1.28       | 0.10                                                               | 0.09        | 1.30       | 1.36        | 0.07                                                             | 0.01        |
| H-11    | 1.33                  | 30.2600  | 30.3340  | 1.29       | 1.22       | 0.04                                                               | 0.11        | 1.32       | 1.30        | 0.01                                                             | 0.03        |
| H-12    | 1.34                  | 30.1980  | 30.2482  | 1.35       | 1.30       | 0.01                                                               | 0.04        | 1.38       | 1.38        | 0.04                                                             | 0.04        |
| H-13    | 0.91                  | 30.6183  | 30.6525  | 0.93       | 0.90       | 0.02                                                               | 0.01        | 0.98       | 1.00        | 0.07                                                             | 0.09        |
| H-14    | 3.15                  | 28.4286  | 28.4065  | 3.12       | 3.14       | 0.03                                                               | 0.01        | 3.09       | 3.12        | 0.06                                                             | 0.03        |
| H-15    | 1.23                  | 30.5246  | 30.3499  | 1.03       | 1.20       | 0.20                                                               | 0.03        | 1.07       | 1.28        | 0.16                                                             | 0.05        |
| H-1'    | 2.89                  | 28.5625  | 28.5838  | 2.99       | 2.97       | 0.09                                                               | 0.07        | 2.96       | 2.95        | 0.07                                                             | 0.06        |
| H-2'    | 4.29                  | 26.9347  | 27.2095  | 4.62       | 4.34       | 0.33                                                               | 0.05        | 4.53       | 4.25        | 0.24                                                             | 0.04        |
|         |                       |          |          |            | <b>MAE</b> | <b>0.10</b>                                                        | <b>0.10</b> |            | <b>CMAE</b> | <b>0.10</b>                                                      | <b>0.08</b> |

**Table S3.** NMR Boltzmann averaged isotropic magnetic shielding values ( $\sigma$ ), unscaled ( $\delta_u$ ) and scaled ( $\delta_s$ ) chemical shifts calculated at the PCM/mPW1PW91/6-31+G\*\*//PCM/B3LYP/6-31G\* (solvent: MeOH) level of theory for all significantly populated conformers of **3-SR** and **3-SS**.

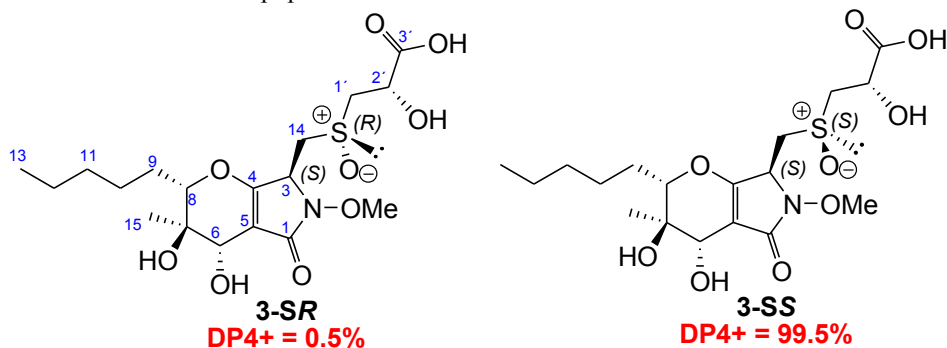

| Atom    | $\delta_{\text{exp}}$ | $\sigma$ |          | $\delta_u$ |            | Unscaled Error<br>( $ \delta_{\text{exp}} - \delta_u $ ) |             | $\delta_s$ |             | Scaled Error<br>( $ \delta_{\text{exp}} - \delta_s $ ) |             |
|---------|-----------------------|----------|----------|------------|------------|----------------------------------------------------------|-------------|------------|-------------|--------------------------------------------------------|-------------|
|         |                       | 3-SR     | 3-SS     | 3-SR       | 3-SS       | 3-SR                                                     | 3-SS        | 3-SR       | 3-SS        | 3-SR                                                   | 3-SS        |
| C-2-OMe | 64.8                  | 131.2915 | 131.1198 | 65.5       | 65.7       | 0.7                                                      | 0.9         | 64.2       | 63.9        | 0.6                                                    | 0.9         |
| C-3     | 58.6                  | 136.1571 | 134.2567 | 60.6       | 62.5       | 2.0                                                      | 3.9         | 59.2       | 60.7        | 0.6                                                    | 2.1         |
| C-4     | 169.3                 | 30.9885  | 29.8370  | 165.8      | 166.9      | 3.5                                                      | 2.4         | 167.2      | 167.7       | 2.1                                                    | 1.6         |
| C-5     | 105.6                 | 89.8349  | 90.2849  | 106.9      | 106.5      | 1.3                                                      | 0.9         | 106.8      | 105.8       | 1.2                                                    | 0.2         |
| C-6     | 66.3                  | 124.1714 | 124.4510 | 72.6       | 72.3       | 6.3                                                      | 6.0         | 71.5       | 70.7        | 5.2                                                    | 4.4         |
| C-7     | 72.4                  | 121.8746 | 122.4500 | 74.9       | 74.3       | 2.5                                                      | 1.9         | 73.9       | 72.8        | 1.5                                                    | 0.4         |
| C-8     | 89.1                  | 107.3824 | 107.3040 | 89.4       | 89.5       | 0.3                                                      | 0.4         | 88.8       | 88.3        | 0.3                                                    | 0.8         |
| C-9     | 29.2                  | 166.0848 | 165.7240 | 30.7       | 31.1       | 1.5                                                      | 1.9         | 28.5       | 28.4        | 0.7                                                    | 0.8         |
| C-10    | 27.7                  | 166.2908 | 165.6435 | 30.5       | 31.1       | 2.8                                                      | 3.4         | 28.3       | 28.5        | 0.6                                                    | 0.8         |
| C-11    | 32.3                  | 161.3588 | 161.4001 | 35.4       | 35.4       | 3.1                                                      | 3.1         | 33.3       | 32.9        | 1.0                                                    | 0.6         |
| C-12    | 23.4                  | 169.4536 | 169.4640 | 27.3       | 27.3       | 3.9                                                      | 3.9         | 25.0       | 24.6        | 1.6                                                    | 1.2         |
| C-13    | 14.2                  | 180.2276 | 179.7549 | 16.6       | 17.0       | 2.4                                                      | 2.8         | 13.9       | 14.0        | 0.3                                                    | 0.2         |
| C-14    | 52.1                  | 140.4336 | 138.4176 | 56.3       | 58.4       | 4.2                                                      | 6.3         | 54.8       | 56.4        | 2.7                                                    | 4.3         |
| C-15    | 19.8                  | 179.6857 | 179.6991 | 17.1       | 17.1       | 2.7                                                      | 2.7         | 14.5       | 14.1        | 5.3                                                    | 5.7         |
| C-1'    | 57.4                  | 143.1502 | 142.8836 | 53.6       | 53.9       | 3.8                                                      | 3.5         | 52.0       | 51.8        | 5.4                                                    | 5.6         |
| C-2'    | 66.9                  | 128.4567 | 126.7194 | 68.3       | 70.1       | 1.4                                                      | 3.2         | 67.1       | 68.4        | 0.2                                                    | 1.5         |
|         |                       |          |          |            | <i>MAE</i> | <b>2.7</b>                                               | <b>2.9</b>  |            | <i>CMAE</i> | <b>1.8</b>                                             | <b>1.9</b>  |
| H-2-OMe | 3.90                  | 27.5866  | 27.6096  | 3.96       | 3.94       | 0.06                                                     | 0.04        | 3.93       | 3.92        | 0.03                                                   | 0.02        |
| H-3     | 4.61                  | 27.1517  | 27.1953  | 4.40       | 4.36       | 0.21                                                     | 0.25        | 4.36       | 4.32        | 0.25                                                   | 0.29        |
| H-6     | 4.00                  | 26.9468  | 27.0765  | 4.60       | 4.47       | 0.60                                                     | 0.47        | 4.56       | 4.44        | 0.56                                                   | 0.44        |
| H-8     | 4.15                  | 27.4476  | 27.3809  | 4.10       | 4.17       | 0.05                                                     | 0.02        | 4.07       | 4.14        | 0.08                                                   | 0.01        |
| H-9a    | 1.91                  | 29.6700  | 29.7226  | 1.88       | 1.83       | 0.03                                                     | 0.08        | 1.91       | 1.85        | 0.00                                                   | 0.06        |
| H-9b    | 1.64                  | 29.7738  | 29.7779  | 1.78       | 1.77       | 0.14                                                     | 0.13        | 1.81       | 1.80        | 0.17                                                   | 0.16        |
| H-10a   | 1.64                  | 29.9627  | 29.8861  | 1.59       | 1.66       | 0.05                                                     | 0.02        | 1.62       | 1.69        | 0.02                                                   | 0.05        |
| H-10b   | 1.40                  | 30.2308  | 30.2888  | 1.32       | 1.26       | 0.08                                                     | 0.14        | 1.36       | 1.30        | 0.04                                                   | 0.10        |
| H-11    | 1.34                  | 30.2718  | 30.2872  | 1.28       | 1.26       | 0.06                                                     | 0.08        | 1.32       | 1.30        | 0.02                                                   | 0.04        |
| H-12    | 1.35                  | 30.2228  | 30.1691  | 1.33       | 1.38       | 0.02                                                     | 0.03        | 1.37       | 1.41        | 0.02                                                   | 0.06        |
| H-13    | 0.92                  | 30.6157  | 30.6351  | 0.93       | 0.92       | 0.01                                                     | 0.00        | 0.99       | 0.96        | 0.07                                                   | 0.04        |
| H-14    | 3.54                  | 28.3458  | 28.2194  | 3.20       | 3.33       | 0.34                                                     | 0.21        | 3.20       | 3.32        | 0.34                                                   | 0.22        |
| H-15    | 1.32                  | 30.3815  | 30.3785  | 1.17       | 1.17       | 0.15                                                     | 0.15        | 1.22       | 1.21        | 0.10                                                   | 0.11        |
| H-1'    | 3.30                  | 28.4383  | 28.2384  | 3.11       | 3.31       | 0.18                                                     | 0.02        | 3.11       | 3.30        | 0.19                                                   | 0.01        |
| H-2'    | 4.40                  | 26.9017  | 27.0323  | 4.65       | 4.52       | 0.25                                                     | 0.12        | 4.60       | 4.48        | 0.20                                                   | 0.08        |
|         |                       |          |          |            | <i>MAE</i> | <b>0.15</b>                                              | <b>0.12</b> |            | <i>CMAE</i> | <b>0.14</b>                                            | <b>0.11</b> |

**Table S4.** NMR Boltzmann averaged isotropic magnetic shielding values ( $\sigma$ ), unscaled ( $\delta_u$ ) and scaled ( $\delta_s$ ) chemical shifts calculated at the PCM/mPW1PW91/6-31+G\*\*//PCM/B3LYP/6-31G\* (solvent: MeOH) level of theory for all significantly populated conformers of **4-3E** and **4-3Z**.

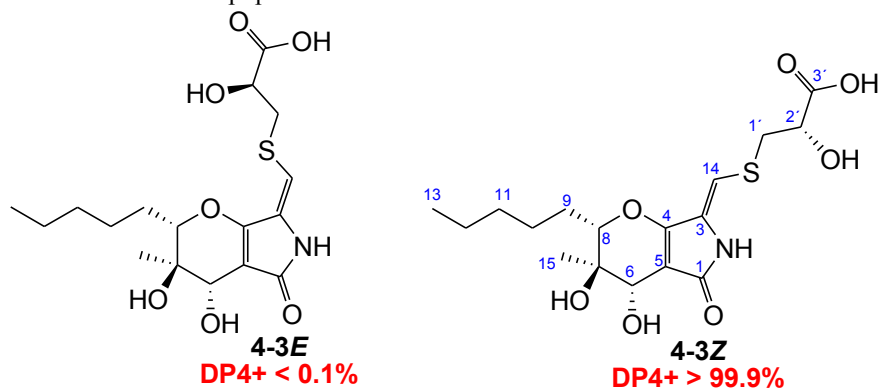

| Atom | $\delta_{\text{exp}}$ | $\sigma$ |          | $\delta_u$ |            | Unscaled Error<br>(abs[ $\delta_{\text{exp}} - \delta_u$ ]) |             | $\delta_s$ |             | Scaled Error<br>(abs[ $\delta_{\text{exp}} - \delta_s$ ]) |             |
|------|-----------------------|----------|----------|------------|------------|-------------------------------------------------------------|-------------|------------|-------------|-----------------------------------------------------------|-------------|
|      |                       | 4-3E     | 4-3Z     | 4-3E       | 4-3Z       | 4-3E                                                        | 4-3Z        | 4-3E       | 4-3Z        | 4-3E                                                      | 4-3Z        |
| C-1  | 175.0                 | 32.1868  | 30.9502  | 164.6      | 165.8      | 10.4                                                        | 9.2         | 167.7      | 169.4       | 7.3                                                       | 5.6         |
| C-3  | 130.2                 | 72.8896  | 69.1313  | 123.9      | 127.6      | 6.3                                                         | 2.6         | 125.0      | 129.3       | 5.2                                                       | 0.9         |
| C-4  | 159.5                 | 39.9567  | 40.6332  | 156.8      | 156.1      | 2.7                                                         | 3.4         | 159.5      | 159.2       | 0.0                                                       | 0.3         |
| C-5  | 105.7                 | 91.1701  | 93.1350  | 105.6      | 103.6      | 0.1                                                         | 2.1         | 105.8      | 104.1       | 0.1                                                       | 1.6         |
| C-6  | 67.5                  | 123.0434 | 122.7562 | 73.7       | 74.0       | 6.2                                                         | 6.5         | 72.4       | 73.1        | 4.9                                                       | 5.6         |
| C-7  | 73.0                  | 122.2488 | 122.2200 | 74.5       | 74.6       | 1.5                                                         | 1.6         | 73.2       | 73.6        | 0.2                                                       | 0.6         |
| C-8  | 87.6                  | 108.7573 | 109.3215 | 88.0       | 87.5       | 0.4                                                         | 0.1         | 87.4       | 87.1        | 0.2                                                       | 0.5         |
| C-9  | 29.1                  | 165.8330 | 165.8193 | 30.9       | 31.0       | 1.8                                                         | 1.9         | 27.5       | 27.9        | 1.6                                                       | 1.2         |
| C-10 | 27.7                  | 165.7511 | 165.8652 | 31.0       | 30.9       | 3.3                                                         | 3.2         | 27.6       | 27.8        | 0.1                                                       | 0.1         |
| C-11 | 32.5                  | 161.2187 | 161.3375 | 35.6       | 35.4       | 3.1                                                         | 2.9         | 32.4       | 32.6        | 0.1                                                       | 0.1         |
| C-12 | 23.4                  | 169.3530 | 169.4581 | 27.4       | 27.3       | 4.0                                                         | 3.9         | 23.8       | 24.1        | 0.4                                                       | 0.7         |
| C-13 | 13.9                  | 180.2878 | 179.9037 | 16.5       | 16.9       | 2.6                                                         | 3.0         | 12.4       | 13.1        | 1.5                                                       | 0.8         |
| C-14 | 110.5                 | 73.1882  | 80.5010  | 123.6      | 116.3      | 13.1                                                        | 5.8         | 124.7      | 117.4       | 14.2                                                      | 6.9         |
| C-15 | 18.8                  | 180.8295 | 181.1981 | 15.9       | 15.6       | 2.9                                                         | 3.2         | 11.8       | 11.8        | 7.0                                                       | 7.0         |
| C-1' | 39.8                  | 151.8481 | 151.4867 | 44.9       | 45.3       | 5.1                                                         | 5.5         | 42.2       | 42.9        | 2.4                                                       | 3.1         |
| C-2' | 72.2                  | 123.4194 | 124.0875 | 73.4       | 72.7       | 1.2                                                         | 0.5         | 72.0       | 71.7        | 0.2                                                       | 0.5         |
| C-3' | 175.5                 | 23.8207  | 23.7082  | 173.0      | 173.1      | 4.0                                                         | 3.5         | 176.4      | 176.9       | 2.8                                                       | 2.2         |
|      |                       |          |          |            | <i>MAE</i> | <i>4.1</i>                                                  | <i>3.4</i>  |            | <i>CMAE</i> | <i>2.9</i>                                                | <i>2.2</i>  |
| H-6  | 4.13                  | 26.7868  | 26.7830  | 4.76       | 4.77       | 0.63                                                        | 0.64        | 4.43       | 4.48        | 0.30                                                      | 0.35        |
| H-8  | 4.03                  | 27.4563  | 27.5248  | 4.09       | 4.03       | 0.06                                                        | 0.00        | 3.83       | 3.81        | 0.20                                                      | 0.22        |
| H-9a | 1.86                  | 29.6270  | 29.6552  | 1.92       | 1.90       | 0.06                                                        | 0.04        | 1.87       | 1.87        | 0.01                                                      | 0.01        |
| H-9b | 1.66                  | 29.7952  | 29.8795  | 1.76       | 1.67       | 0.10                                                        | 0.01        | 1.72       | 1.67        | 0.06                                                      | 0.01        |
| H-10 | 1.48                  | 30.0119  | 30.0757  | 1.54       | 1.47       | 0.06                                                        | 0.01        | 1.52       | 1.49        | 0.04                                                      | 0.01        |
| H-11 | 1.34                  | 30.2474  | 30.2719  | 1.30       | 1.28       | 0.04                                                        | 0.06        | 1.31       | 1.31        | 0.03                                                      | 0.03        |
| H-12 | 1.34                  | 30.1970  | 30.2062  | 1.35       | 1.34       | 0.01                                                        | 0.00        | 1.36       | 1.37        | 0.02                                                      | 0.03        |
| H-13 | 0.91                  | 30.6071  | 30.6329  | 0.94       | 0.92       | 0.03                                                        | 0.01        | 0.99       | 0.98        | 0.08                                                      | 0.07        |
| H-14 | 6.31                  | 24.7342  | 24.8516  | 6.82       | 6.70       | 0.51                                                        | 0.39        | 6.29       | 6.24        | 0.02                                                      | 0.07        |
| H-15 | 1.28                  | 30.4140  | 30.4476  | 1.14       | 1.10       | 0.14                                                        | 0.18        | 1.16       | 1.15        | 0.12                                                      | 0.13        |
| H-1' | 3.19                  | 28.3553  | 28.3076  | 3.20       | 3.24       | 0.01                                                        | 0.05        | 3.02       | 3.10        | 0.17                                                      | 0.09        |
| H-2' | 4.29                  | 26.9019  | 26.9277  | 4.65       | 4.62       | 0.36                                                        | 0.33        | 4.33       | 4.35        | 0.04                                                      | 0.06        |
|      |                       |          |          |            | <i>MAE</i> | <i>0.17</i>                                                 | <i>0.14</i> |            | <i>CMAE</i> | <i>0.09</i>                                               | <i>0.09</i> |

**Table S5.** NMR Boltzmann averaged isotropic magnetic shielding values ( $\sigma$ ), unscaled ( $\delta_u$ ) and scaled ( $\delta_s$ ) chemical shifts calculated at the PCM/mPW1PW91/6-31+G\*\*//PCM/B3LYP/6-31G\* (solvent: MeOH) level of theory for all significantly populated conformers of **5-3R** and **5-3S**.

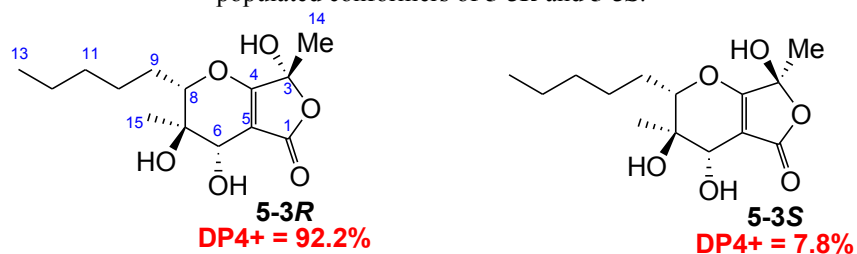

| Atom | $\delta_{\text{exp}}$ | $\sigma$ |          | $\delta_u$ |            | Unscaled Error<br>(abs[ $\delta_{\text{exp}} - \delta_u$ ]) |             | $\delta_s$ |             | Scaled Error<br>(abs[ $\delta_{\text{exp}} - \delta_s$ ]) |             |
|------|-----------------------|----------|----------|------------|------------|-------------------------------------------------------------|-------------|------------|-------------|-----------------------------------------------------------|-------------|
|      |                       | 5-3R     | 5-3S     | 5-3R       | 5-3S       | 5-3R                                                        | 5-3S        | 5-3R       | 5-3S        | 5-3R                                                      | 5-3S        |
| C-1  | 174.7                 | 30.1186  | 30.1382  | 166.7      | 166.6      | 8.0                                                         | 8.1         | 169.6      | 169.6       | 5.1                                                       | 5.1         |
| C-3  | 102.5                 | 92.8282  | 92.5063  | 104.0      | 104.3      | 1.5                                                         | 1.8         | 104.3      | 104.7       | 1.8                                                       | 2.2         |
| C-4  | 174.7                 | 24.3932  | 24.3599  | 172.4      | 172.4      | 2.3                                                         | 2.3         | 175.5      | 175.6       | 0.8                                                       | 0.9         |
| C-5  | 102.0                 | 93.1896  | 93.7808  | 103.6      | 103.0      | 1.6                                                         | 1.0         | 104.0      | 103.3       | 2.0                                                       | 1.3         |
| C-6  | 66.5                  | 125.0119 | 124.6208 | 71.8       | 72.2       | 5.3                                                         | 5.7         | 70.9       | 71.2        | 4.4                                                       | 4.7         |
| C-7  | 72.4                  | 122.5304 | 122.6374 | 74.2       | 74.1       | 1.8                                                         | 1.7         | 73.4       | 73.3        | 1.0                                                       | 0.9         |
| C-8  | 88.6                  | 106.8554 | 106.7124 | 89.9       | 90.1       | 1.3                                                         | 1.5         | 89.7       | 89.9        | 1.1                                                       | 1.3         |
| C-9  | 28.9                  | 165.9589 | 165.8647 | 30.8       | 30.9       | 1.9                                                         | 2.0         | 28.2       | 28.3        | 0.7                                                       | 0.6         |
| C-10 | 27.2                  | 166.2754 | 166.1219 | 30.5       | 30.7       | 3.3                                                         | 3.5         | 27.9       | 28.0        | 0.7                                                       | 0.8         |
| C-11 | 32.1                  | 161.5856 | 161.5418 | 35.2       | 35.2       | 3.1                                                         | 3.1         | 32.8       | 32.8        | 0.7                                                       | 0.7         |
| C-12 | 23.1                  | 169.7554 | 169.5599 | 27.0       | 27.2       | 3.9                                                         | 4.1         | 24.3       | 24.4        | 1.2                                                       | 1.3         |
| C-13 | 13.9                  | 180.3135 | 180.4119 | 16.5       | 16.4       | 2.6                                                         | 2.5         | 13.3       | 13.1        | 0.6                                                       | 0.8         |
| C-14 | 22.9                  | 173.3273 | 173.0114 | 23.5       | 23.8       | 0.6                                                         | 0.9         | 20.6       | 20.8        | 2.3                                                       | 2.1         |
| C-15 | 19.4                  | 179.3773 | 179.6340 | 17.4       | 17.1       | 2.0                                                         | 2.3         | 14.3       | 13.9        | 5.1                                                       | 5.5         |
|      |                       |          |          |            | <b>MAE</b> | <b>2.8</b>                                                  | <b>2.9</b>  |            | <b>CMAE</b> | <b>2.0</b>                                                | <b>2.0</b>  |
| H-6  | 4.05                  | 27.0075  | 26.9616  | 4.54       | 4.59       | 0.49                                                        | 0.54        | 4.27       | 4.30        | 0.22                                                      | 0.25        |
| H-8  | 4.17                  | 27.3531  | 27.3594  | 4.20       | 4.19       | 0.03                                                        | 0.02        | 3.96       | 3.94        | 0.21                                                      | 0.23        |
| H-9a | 1.90                  | 29.6428  | 29.6909  | 1.91       | 1.86       | 0.01                                                        | 0.04        | 1.87       | 1.82        | 0.03                                                      | 0.08        |
| H-9b | 1.66                  | 29.7881  | 29.7174  | 1.76       | 1.83       | 0.10                                                        | 0.17        | 1.74       | 1.80        | 0.08                                                      | 0.14        |
| H-10 | 1.49                  | 30.0454  | 30.0537  | 1.51       | 1.50       | 0.02                                                        | 0.01        | 1.50       | 1.50        | 0.01                                                      | 0.01        |
| H-11 | 1.34                  | 30.2572  | 30.2499  | 1.29       | 1.30       | 0.05                                                        | 0.04        | 1.31       | 1.32        | 0.03                                                      | 0.02        |
| H-12 | 1.35                  | 30.2291  | 30.2298  | 1.32       | 1.32       | 0.03                                                        | 0.03        | 1.33       | 1.34        | 0.02                                                      | 0.01        |
| H-13 | 0.92                  | 30.6186  | 30.6102  | 0.93       | 0.94       | 0.01                                                        | 0.02        | 0.98       | 0.99        | 0.06                                                      | 0.07        |
| H-14 | 1.64                  | 29.8662  | 29.8849  | 1.68       | 1.67       | 0.04                                                        | 0.03        | 1.67       | 1.65        | 0.03                                                      | 0.01        |
| H-15 | 1.32                  | 30.3666  | 30.3883  | 1.18       | 1.16       | 0.14                                                        | 0.16        | 1.21       | 1.19        | 0.11                                                      | 0.13        |
|      |                       |          |          |            | <b>MAE</b> | <b>0.09</b>                                                 | <b>0.11</b> |            | <b>CMAE</b> | <b>0.08</b>                                               | <b>0.09</b> |



Cartesian Coordinates of all significantly populated conformers found for all compounds under study at the PCM/B3LYP/6-31G\* level of theory.

### 1-3R-c1

B3LYP/6-31G\* geometry

|     |           |           |           |
|-----|-----------|-----------|-----------|
| O 0 | 0.961248  | -0.880736 | -0.855789 |
| C 0 | 0.347093  | -3.162214 | -0.502072 |
| C 0 | 2.121991  | -2.223141 | 0.921462  |
| C 0 | 1.540049  | -3.531706 | 0.322362  |
| C 0 | 2.262483  | -1.191368 | -0.237284 |
| C 0 | 0.155939  | -1.927914 | -1.006804 |
| C 0 | -1.143032 | -1.826488 | -1.769604 |
| N 0 | -1.768790 | -3.108391 | -1.393606 |
| C 0 | -0.804842 | -3.984948 | -0.837190 |
| O 0 | -2.590682 | -3.659018 | -2.393525 |
| C 0 | -3.900889 | -3.922616 | -1.869947 |
| C 0 | -2.005200 | -0.597910 | -1.470805 |
| S 0 | -2.566138 | -0.576624 | 0.286428  |
| C 0 | -2.820695 | 1.220788  | 0.543480  |
| C 0 | -4.043485 | 1.776454  | -0.212822 |
| C 0 | -4.275600 | 3.228156  | 0.223339  |
| O 0 | -5.232995 | 1.050613  | 0.061799  |
| O 0 | -3.510738 | 4.127046  | -0.052761 |
| O 0 | -5.372783 | 3.418910  | 0.967388  |
| O 0 | -0.974921 | -5.185618 | -0.644578 |
| O 0 | 1.219872  | -4.440962 | 1.371609  |
| O 0 | 3.468258  | -2.460182 | 1.345511  |
| C 0 | 1.276175  | -1.701226 | 2.088533  |
| C 0 | 2.887368  | 0.141264  | 0.152862  |
| C 0 | 3.243221  | 1.025501  | -1.051113 |
| C 0 | 3.885778  | 2.355421  | -0.638216 |
| C 0 | 4.260533  | 3.246511  | -1.829589 |
| C 0 | 4.902376  | 4.573097  | -1.410465 |
| H 0 | 2.327511  | -3.969381 | -0.311380 |
| H 0 | 2.861932  | -1.664248 | -1.025641 |
| H 0 | -0.936784 | -1.834041 | -2.849405 |
| H 0 | -4.469288 | -4.308473 | -2.719542 |
| H 0 | -4.367301 | -3.006651 | -1.492183 |
| H 0 | -3.857937 | -4.675722 | -1.077546 |
| H 0 | -2.867504 | -0.594010 | -2.141503 |
| H 0 | -1.412559 | 0.301833  | -1.661196 |
| H 0 | -1.924075 | 1.779580  | 0.263975  |
| H 0 | -2.971780 | 1.326557  | 1.622514  |
| H 0 | -3.836451 | 1.790306  | -1.290487 |
| H 0 | -4.988285 | 0.114170  | 0.193133  |
| H 0 | -5.822314 | 2.545808  | 1.032764  |
| H 0 | 0.672238  | -5.140897 | 0.971153  |
| H 0 | 3.432145  | -3.196741 | 1.979132  |
| H 0 | 1.759438  | -0.831390 | 2.540979  |
| H 0 | 0.268681  | -1.415588 | 1.770241  |
| H 0 | 1.180005  | -2.480291 | 2.849405  |
| H 0 | 2.201388  | 0.678287  | 0.819169  |
| H 0 | 3.790282  | -0.080565 | 0.732137  |
| H 0 | 2.339263  | 1.223717  | -1.641586 |
| H 0 | 3.931460  | 0.477412  | -1.710910 |
| H 0 | 3.196556  | 2.903423  | 0.021249  |
| H 0 | 4.786139  | 2.153820  | -0.038956 |
| H 0 | 3.360659  | 3.447435  | -2.428037 |
| H 0 | 4.949215  | 2.698434  | -2.488138 |
| H 0 | 4.222921  | 5.159655  | -0.779603 |
| H 0 | 5.160616  | 5.185618  | -2.282019 |
| H 0 | 5.822314  | 4.403320  | -0.837159 |

Free Energy (PCM/B3LYP/6-31G\*) = -1757.654959

Number of imaginary frequencies = 0

### 1-3R-c2

B3LYP/6-31G\* geometry

|     |           |           |           |
|-----|-----------|-----------|-----------|
| O 0 | 0.096526  | -0.822439 | 0.173369  |
| C 0 | -1.721191 | 0.531599  | 0.925309  |
| C 0 | 0.028119  | 1.606303  | -0.440348 |
| C 0 | -1.105218 | 1.854259  | 0.594504  |
| C 0 | 0.889968  | 0.415209  | 0.075723  |
| C 0 | -1.120253 | -0.648908 | 0.683598  |
| C 0 | -1.993012 | -1.819863 | 1.063477  |
| N 0 | -3.081034 | -1.102114 | 1.757260  |
| C 0 | -3.052026 | 0.272544  | 1.456854  |

|     |           |           |           |
|-----|-----------|-----------|-----------|
| O 0 | -4.336855 | -1.721394 | 1.737563  |
| C 0 | -4.796067 | -1.986491 | 3.079555  |
| C 0 | -2.450651 | -2.693515 | -0.122197 |
| S 0 | -3.361252 | -1.799423 | -1.449093 |
| C 0 | -5.058199 | -2.536060 | -1.372538 |
| C 0 | -6.177200 | -1.490812 | -1.286211 |
| C 0 | -6.102686 | -0.505493 | -2.469229 |
| O 0 | -6.221280 | -0.739073 | -0.082671 |
| O 0 | -6.131165 | -0.857303 | -3.630429 |
| O 0 | -6.004312 | 0.775067  | -2.099927 |
| O 0 | -3.977347 | 1.060182  | 1.644201  |
| O 0 | -2.055542 | 2.777346  | 0.068494  |
| O 0 | 0.925082  | 2.721399  | -0.428252 |
| C 0 | -0.521272 | 1.378356  | -1.852582 |
| C 0 | 2.113567  | 0.084282  | -0.767678 |
| C 0 | 3.052727  | -0.936725 | -0.109247 |
| C 0 | 4.286560  | -1.243252 | -0.967163 |
| C 0 | 5.237318  | -2.261096 | -0.323973 |
| C 0 | 6.467638  | -2.564106 | -1.185361 |
| H 0 | -0.629065 | 2.291295  | 1.486759  |
| H 0 | 1.200018  | 0.652841  | 1.101578  |
| H 0 | -1.466148 | -2.478351 | 1.765562  |
| H 0 | -4.094170 | -2.648082 | 3.593837  |
| H 0 | -5.761284 | -2.480133 | 2.952558  |
| H 0 | -4.916373 | -1.050634 | 3.630429  |
| H 0 | -3.076851 | -3.507434 | 0.246988  |
| H 0 | -1.557002 | -3.137289 | -0.568699 |
| H 0 | -5.114194 | -3.204383 | -0.510577 |
| H 0 | -5.214675 | -3.125010 | -2.278405 |
| H 0 | -7.125631 | -2.034975 | -1.397595 |
| H 0 | -5.499876 | -1.006553 | 0.527090  |
| H 0 | -5.997775 | 0.756428  | -1.110885 |
| H 0 | -2.873474 | 2.659931  | 0.587317  |
| H 0 | 0.393750  | 3.507434  | -0.640120 |
| H 0 | 0.303197  | 1.282251  | -2.563555 |
| H 0 | -1.139169 | 2.230345  | -2.147417 |
| H 0 | -1.142451 | 0.479546  | -1.913107 |
| H 0 | 1.786640  | -0.289757 | -1.745501 |
| H 0 | 2.648924  | 1.023124  | -0.946133 |
| H 0 | 2.503725  | -1.866741 | 0.086941  |
| H 0 | 3.375397  | -0.553724 | 0.869862  |
| H 0 | 3.962686  | -1.620386 | -1.948562 |
| H 0 | 4.834168  | -0.309756 | -1.164567 |
| H 0 | 4.688939  | -3.193235 | -0.127084 |
| H 0 | 5.560709  | -1.884267 | 0.656795  |
| H 0 | 6.176675  | -2.973665 | -2.160700 |
| H 0 | 7.125631  | -3.294031 | -0.699826 |
| H 0 | 7.055033  | -1.656000 | -1.369620 |

Free Energy (PCM/B3LYP/6-31G\*) = -1757.654904

Number of imaginary frequencies = 0

### 1-3R-c3

B3LYP/6-31G\* geometry

|     |           |           |           |
|-----|-----------|-----------|-----------|
| O 0 | 1.292311  | -0.594236 | -0.213857 |
| C 0 | 0.236750  | -2.699400 | -0.609733 |
| C 0 | 2.631949  | -2.708596 | -0.043818 |
| C 0 | 1.496930  | -3.493928 | -0.752591 |
| C 0 | 2.575543  | -1.236728 | -0.550739 |
| C 0 | 0.224747  | -1.374457 | -0.364643 |
| C 0 | -1.176960 | -0.837884 | -0.193887 |
| N 0 | -1.942091 | -2.103633 | -0.183886 |
| C 0 | -1.134787 | -3.175664 | -0.642409 |
| O 0 | -3.215845 | -2.028026 | -0.795292 |
| C 0 | -4.213396 | -2.632317 | 0.048928  |
| C 0 | -1.326804 | 0.000803  | 1.082391  |
| S 0 | -2.997105 | 0.674128  | 1.437296  |
| C 0 | -3.184754 | 2.017415  | 0.188488  |
| C 0 | -4.039837 | 1.652168  | -1.044736 |
| C 0 | -5.472027 | 1.293379  | -0.646643 |
| O 0 | -3.482118 | 0.640002  | -1.844531 |
| O 0 | -5.976465 | 0.202863  | -0.813236 |
| O 0 | -6.106406 | 2.332464  | -0.073604 |
| O 0 | -1.555478 | -4.288638 | -0.947336 |
| O 0 | 1.388900  | -4.796809 | -0.185248 |
| O 0 | 3.896175  | -3.194627 | -0.505084 |
| C 0 | 2.543083  | -2.817854 | 1.482646  |
| C 0 | 3.671260  | -0.322449 | -0.019412 |

C 0 3.724118 1.040726 -0.724002  
C 0 4.837362 1.944910 -0.180421  
C 0 4.905881 3.310432 -0.876163  
C 0 6.018376 4.210644 -0.328874  
H 0 1.782910 -3.580576 -1.812627  
H 0 2.616773 -1.265586 -1.646972  
H 0 -1.468166 -0.243525 -1.067947  
H 0 -4.226008 -2.153669 1.031534  
H 0 -4.023468 -3.704172 0.141756  
H 0 -5.158103 -2.452552 -0.466875  
H 0 -0.612338 0.828821 1.051099  
H 0 -1.089243 -0.615271 1.954912  
H 0 -2.190182 2.322038 -0.148557  
H 0 -3.639241 2.865839 0.706889  
H 0 -4.091862 2.555302 -1.665938  
H 0 -3.661701 -0.227826 -1.425627  
H 0 -7.003065 2.034061 0.175244  
H 0 0.559429 -5.177266 -0.527473  
H 0 3.900663 -4.152230 -0.336552  
H 0 1.627234 -2.365151 1.874721  
H 0 2.549813 -3.870510 1.776978  
H 0 3.401435 -2.321432 1.942252  
H 0 3.527655 -0.177843 1.058276  
H 0 4.624173 -0.847235 -0.148872  
H 0 2.756345 1.547158 -0.615371  
H 0 3.874093 0.885118 -1.802250  
H 0 4.689039 2.095874 0.899176  
H 0 5.805991 1.434312 -0.286964  
H 0 3.937210 3.819100 -0.769449  
H 0 5.054104 3.159712 -1.954912  
H 0 5.878039 4.407204 0.741353  
H 0 6.040629 5.177266 -0.845266  
H 0 7.003065 3.743093 -0.453162  
Free Energy (PCM/B3LYP/6-31G\*) = -1757.654843  
Number of imaginary frequencies = 0

### 1-3R-c4

B3LYP/6-31G\* geometry  
O 0 1.854594 -1.152064 -0.240684  
C 0 1.693046 -3.487800 -0.694858  
C 0 3.918935 -2.576259 -0.174803  
C 0 3.157728 -3.722979 -0.889531  
C 0 3.272921 -1.233431 -0.627112  
C 0 1.166734 -2.281767 -0.400108  
C 0 -0.327216 -2.353866 -0.188276  
N 0 -0.511440 -3.821811 -0.184168  
C 0 0.628059 -4.477315 -0.691317  
O 0 -1.752265 -4.254110 -0.685106  
C 0 -2.398901 -5.112650 0.265799  
C 0 -0.850601 -1.729604 1.113989  
S 0 -0.865301 0.112652 1.142869  
C 0 -2.629033 0.516982 0.840477  
C 0 -3.044124 0.521302 -0.644510  
C 0 -4.503342 0.957557 -0.759564  
O 0 -2.897023 -0.742322 -1.256397  
O 0 -5.394481 0.189445 -1.066633  
O 0 -4.686837 2.247736 -0.454032  
O 0 0.685088 -5.667000 -1.000552  
O 0 3.579086 -4.982161 -0.370583  
O 0 5.257502 -2.514570 -0.678490  
C 0 3.930331 -2.752172 1.347748  
C 0 3.943253 0.024342 -0.090207  
C 0 3.438166 1.314792 -0.751075  
C 0 4.140462 2.569100 -0.216139  
C 0 3.651562 3.866278 -0.873122  
C 0 4.356558 5.116693 -0.337347  
H 0 3.422993 -3.663382 -1.957143  
H 0 3.286008 -1.217975 -1.724511  
H 0 -0.872098 -1.923427 -1.035631  
H 0 -3.361604 -5.359814 -0.188193  
H 0 -2.556671 -4.599361 1.220369  
H 0 -1.816500 -6.025117 0.424074  
H 0 -0.242668 -2.061308 1.960171  
H 0 -1.874631 -2.071567 1.278264  
H 0 -2.766895 1.518033 1.259846  
H 0 -3.258471 -0.176541 1.407964  
H 0 -2.419707 1.241432 -1.184730

H 0 -3.781282 -1.155510 -1.250029  
H 0 -5.643088 2.442195 -0.512963  
H 0 2.921980 -5.635540 -0.675316  
H 0 5.643088 -3.396969 -0.544199  
H 0 2.923294 -2.710358 1.773952  
H 0 4.361985 -3.723725 1.601853  
H 0 4.536883 -1.969227 1.809962  
H 0 3.791245 0.077414 0.994761  
H 0 5.020309 -0.083928 -0.258877  
H 0 2.355634 1.407275 -0.595194  
H 0 3.591154 1.247780 -1.838090  
H 0 3.989690 2.634784 0.871612  
H 0 5.225734 2.472054 -0.368613  
H 0 2.567364 3.962656 -0.719629  
H 0 3.801072 3.799565 -1.960171  
H 0 4.197124 5.229252 0.742268  
H 0 3.985382 6.025117 -0.825755  
H 0 5.439055 5.064559 -0.508341  
Free Energy (PCM/B3LYP/6-31G\*) = -1757.65458  
Number of imaginary frequencies = 0

### 1-3R-c5

B3LYP/6-31G\* geometry  
O 0 -0.429809 -1.560244 -0.861847  
C 0 -2.446443 -2.784455 -0.489146  
C 0 -0.504387 -3.322579 0.925870  
C 0 -1.838054 -3.865205 0.347926  
C 0 0.295910 -2.688511 -0.251059  
C 0 -1.738716 -1.764438 -1.011374  
C 0 -2.612146 -0.819326 -1.799322  
N 0 -3.946839 -1.321203 -1.419474  
C 0 -3.848540 -2.603476 -0.835466  
O 0 -4.920673 -1.176660 -2.424724  
C 0 -6.066464 -0.482582 -1.910184  
C 0 -2.423009 0.680021 -1.553065  
S 0 -2.650777 1.208000 0.199366  
C 0 -0.928030 1.573100 0.727572  
C 0 -0.367435 2.924799 0.257836  
C 0 -1.258385 4.094397 0.664011  
O 0 -0.178321 2.953927 -1.141605  
O 0 -1.711659 4.882130 -0.144146  
O 0 -1.467875 4.158940 1.983276  
O 0 -4.792889 -3.362554 -0.629374  
O 0 -2.692630 -4.278997 1.410850  
O 0 0.307205 -4.422823 1.349645  
C 0 -0.737340 -2.352295 2.089340  
C 0 1.683925 -2.174937 0.106701  
C 0 2.521045 -1.773260 -1.116406  
C 0 3.918960 -1.269453 -0.736528  
C 0 4.770706 -0.867723 -1.947768  
C 0 6.164324 -0.360848 -1.562430  
H 0 -1.583635 -4.737561 -0.274822  
H 0 0.377053 -3.449791 -1.037464  
H 0 -2.463554 -0.999955 -2.874676  
H 0 -6.746654 -0.395815 -2.760924  
H 0 -5.795940 0.514070 -1.545410  
H 0 -6.542094 -1.057662 -1.110327  
H 0 -3.156737 1.221620 -2.155758  
H 0 -1.432234 1.000322 -1.878196  
H 0 -0.270403 0.773952 0.378143  
H 0 -0.944249 1.545554 1.820485  
H 0 0.601672 3.064975 0.762779  
H 0 -0.705847 3.708073 -1.468942  
H 0 -2.044140 4.927626 2.162878  
H 0 -3.572973 -4.416561 1.015035  
H 0 -0.224251 -4.927626 1.988388  
H 0 -1.301855 -1.467352 1.779670  
H 0 -1.309069 -2.853720 2.874676  
H 0 0.219772 -2.030614 2.507808  
H 0 1.589752 -1.321344 0.789176  
H 0 2.191265 -2.972330 0.660586  
H 0 1.993817 -0.994642 -1.682535  
H 0 2.615063 -2.637496 -1.789895  
H 0 3.823103 -0.407573 -0.059631  
H 0 4.444700 -2.049130 -0.165534  
H 0 4.242970 -0.090397 -2.518424  
H 0 4.867798 -1.729485 -2.623214

H O 6.098463 0.520471 -0.912332  
H O 6.746654 -0.079810 -2.447534  
H O 6.729547 -1.129796 -1.021190  
Free Energy (PCM/B3LYP/6-31G\*) = -1757.654275  
Number of imaginary frequencies = 0

### 1-3R-c6

B3LYP/6-31G\* geometry

O O -0.362117 -1.517664 -0.869429  
C O -2.281490 -2.887346 -0.486843  
C O -0.313498 -3.254909 0.943604  
C O -1.595424 -3.909183 0.364211  
C O 0.444451 -2.577227 -0.236994  
C O -1.651301 -1.821448 -1.017218  
C O -2.593933 -0.944748 -1.804005  
N O -3.887597 -1.539959 -1.415744  
C O -3.694368 -2.809180 -0.826649  
O O -4.875275 -1.469500 -2.414862  
C O -6.059552 -0.844187 -1.898844  
C O -2.509650 0.562946 -1.553589  
S O -2.758742 1.053311 0.207966  
C O -1.086495 1.652625 0.682640  
C O -0.742037 3.073858 0.209828  
C O -1.765338 4.101726 0.681845  
O O -0.631038 3.146315 -1.196045  
O O -2.375627 4.818215 -0.088405  
O O -1.903746 4.129017 2.011838  
O O -4.581321 -3.632349 -0.611387  
O O -2.421747 -4.377748 1.426642  
O O 0.577949 -4.281432 1.390969  
C O -0.633939 -2.287512 2.088330  
C O 1.784594 -1.951201 0.124198  
C O 2.605441 -1.513678 -1.097563  
C O 3.952937 -0.891421 -0.711282  
C O 4.791966 -0.455938 -1.919609  
C O 6.133447 0.171035 -1.526160  
H O -1.268228 -4.765186 -0.247179  
H O 0.591806 -3.341041 -1.011313  
H O -2.439261 -1.114016 -2.880181  
H O -6.747930 -0.805011 -2.746499  
H O -5.849009 0.169519 -1.541578  
H O -6.494835 -1.442253 -1.092847  
H O -3.280791 1.055873 -2.151021  
H O -1.544758 0.951872 -1.881519  
H O -0.337123 0.955826 0.299736  
H O -1.057424 1.613647 1.774959  
H O 0.223224 3.341482 0.667982  
H O -1.297202 3.799548 -1.485069  
H O -2.573647 4.804860 2.234699  
H O -3.289532 -4.577693 1.029506  
H O 0.080255 -4.818215 2.030860  
H O -1.269762 -1.460379 1.757994  
H O -1.165522 -2.821851 2.880181  
H O 0.289813 -1.877873 2.504934  
H O 1.615855 -1.092465 0.785592  
H O 2.344386 -2.694537 0.702187  
H O 2.027016 -0.793344 -1.690366  
H O 2.777996 -2.383725 -1.747669  
H O 3.778165 -0.022190 -0.059922  
H O 4.528149 -1.611847 -0.110840  
H O 4.214772 0.260851 -2.520825  
H O 4.970002 -1.325053 -2.568630  
H O 5.985674 1.061455 -0.902381  
H O 6.707889 0.473845 -2.409221  
H O 6.747930 -0.535374 -0.954223  
Free Energy (PCM/B3LYP/6-31G\*) = -1757.654057  
Number of imaginary frequencies = 0

### 1-3R-c7

B3LYP/6-31G\* geometry

O O -0.419179 -0.305750 0.108769  
C O 0.820621 -2.346694 0.049126  
C O -1.204374 -2.193173 -1.346169  
C O -0.222035 -3.167717 -0.639167  
C O -1.592678 -1.082728 -0.322802  
C O 0.666242 -1.043731 0.342707  
C O 1.889033 -0.466774 1.012123

N O 2.688076 -1.696421 1.180996  
C O 2.165657 -2.760679 0.439293  
O O 4.074237 -1.563483 1.249863  
C O 4.541485 -1.853711 2.578649  
C O 2.592177 0.667535 0.243638  
S O 3.047436 0.265830 -1.498677  
C O 4.882876 0.136322 -1.442059  
C O 5.608552 1.479528 -1.599847  
C O 5.620658 2.321606 -0.308598  
O O 5.122067 2.263002 -2.686362  
O O 5.831966 1.861400 0.794883  
O O 5.421847 3.628536 -0.513084  
O O 2.730975 -3.827925 0.201926  
O O 0.342011 -4.073835 -1.584951  
O O -2.435835 -2.875158 -1.608107  
C O -0.620531 -1.630542 -2.646400  
C O -2.623261 -0.077414 -0.818596  
C O -3.154266 0.851540 0.282852  
C O -4.203109 1.842076 -0.237995  
C O -4.748447 2.779979 0.846869  
C O -5.799397 3.762533 0.319910  
H O -0.814148 -3.735504 0.096582  
H O -1.968106 -1.584619 0.578494  
H O 1.619549 -0.057667 1.995236  
H O 4.320955 -2.891477 2.845736  
H O 4.094260 -1.172867 3.310056  
H O 5.621440 -1.697601 2.535786  
H O 3.492873 0.961799 0.782850  
H O 1.914145 1.524253 0.218889  
H O 5.141425 -0.505949 -2.287646  
H O 5.184102 -0.362102 -0.519859  
H O 6.661059 1.264182 -1.823537  
H O 4.151039 2.136239 -2.707917  
H O 5.264113 3.728494 -1.480962  
H O 1.160701 -4.417720 -1.178287  
H O -2.214497 -3.647158 -2.155905  
H O -1.364012 -1.009167 -3.152178  
H O 0.276698 -1.029606 -2.469276  
H O -0.343875 -2.453867 -3.310056  
H O -2.182483 0.519923 -1.625933  
H O -3.449595 -0.648000 -1.256117  
H O -2.318849 1.404802 0.731031  
H O -3.593429 0.245105 1.088283  
H O -3.764950 2.442678 -1.048875  
H O -5.037582 1.284103 -0.688145  
H O -3.914473 3.339808 1.293426  
H O -5.182718 2.179572 1.658872  
H O -5.384076 4.400055 -0.470475  
H O -6.169623 4.417720 1.116891  
H O -6.661059 3.230703 -0.102439  
Free Energy (PCM/B3LYP/6-31G\*) = -1757.65399  
Number of imaginary frequencies = 0

### 1-3R-c8

B3LYP/6-31G\* geometry

O O 0.284554 -0.147278 -0.140438  
C O -1.382380 1.556087 0.013776  
C O 0.487690 1.917640 -1.551787  
C O -0.618102 2.616493 -0.712515  
C O 1.209757 0.892019 -0.626124  
C O -0.911660 0.312224 0.220308  
C O -1.904602 -0.553264 0.959801  
N O -2.925414 0.465566 1.291837  
C O -2.733803 1.645797 0.554815  
O O -4.239256 0.024029 1.452404  
C O -4.655861 0.139755 2.827196  
C O -2.435972 -1.758499 0.169537  
S O -3.127703 -1.289807 -1.478179  
C O -4.422206 -2.583174 -1.695474  
C O -5.827855 -2.113941 -1.316670  
C O -6.353513 -1.034541 -2.284329  
O O -5.975596 -1.684283 0.030568  
O O -6.149621 -1.041395 -3.479754  
O O -7.108686 -0.099863 -1.691362  
O O -3.544633 2.561473 0.437702  
O O -1.454418 3.402854 -1.557602  
O O 1.503099 2.872996 -1.876038

|     |           |           |           |
|-----|-----------|-----------|-----------|
| C 0 | -0.072172 | 1.279056  | -2.827232 |
| C 0 | 2.387289  | 0.163932  | -1.259792 |
| C 0 | 3.219550  | -0.646727 | -0.256244 |
| C 0 | 4.405577  | -1.361496 | -0.915926 |
| C 0 | 5.257810  | -2.168671 | 0.071571  |
| C 0 | 6.440444  | -2.879056 | -0.594950 |
| H 0 | -0.101963 | 3.276054  | 0.003372  |
| H 0 | 1.544525  | 1.434921  | 0.267249  |
| H 0 | -1.453029 | -0.944431 | 1.880254  |
| H 0 | -4.648204 | 1.188419  | 3.135099  |
| H 0 | -4.010092 | -0.455014 | 3.479754  |
| H 0 | -5.674301 | -0.253015 | 2.845288  |
| H 0 | -3.217090 | -2.248061 | 0.754139  |
| H 0 | -1.612216 | -2.464065 | 0.033322  |
| H 0 | -4.145133 | -3.464953 | -1.113388 |
| H 0 | -4.417997 | -2.856117 | -2.752503 |
| H 0 | -6.503107 | -2.972579 | -1.428839 |
| H 0 | -5.246464 | -1.068514 | 0.263683  |
| H 0 | -7.099089 | -0.313291 | -0.730350 |
| H 0 | -2.281915 | 3.553566  | -1.062303 |
| H 0 | 1.065595  | 3.586222  | -2.370939 |
| H 0 | 0.744610  | 0.875486  | -3.431078 |
| H 0 | -0.776355 | 0.470789  | -2.608010 |
| H 0 | -0.601383 | 2.034075  | -3.414265 |
| H 0 | 2.015195  | -0.496514 | -2.052564 |
| H 0 | 3.016077  | 0.920500  | -1.741451 |
| H 0 | 2.578021  | -1.385242 | 0.241705  |
| H 0 | 3.590703  | 0.024521  | 0.531870  |
| H 0 | 4.033011  | -2.031957 | -1.704684 |
| H 0 | 5.041380  | -0.619554 | -1.421451 |
| H 0 | 4.622104  | -2.909848 | 0.576433  |
| H 0 | 5.630359  | -1.498614 | 0.859471  |
| H 0 | 6.097557  | -3.586222 | -1.360517 |
| H 0 | 7.033201  | -3.440827 | 0.136182  |
| H 0 | 7.108686  | -2.159775 | -1.084638 |

Free Energy (PCM/B3LYP/6-31G\*) = -1757.653944  
Number of imaginary frequencies = 0

### 1-3R-c9

B3LYP/6-31G\* geometry

|     |           |           |           |
|-----|-----------|-----------|-----------|
| O 0 | 0.923165  | -0.035178 | -0.122917 |
| C 0 | -0.618210 | 1.783313  | 0.016689  |
| C 0 | 1.348523  | 2.050391  | -1.448095 |
| C 0 | 0.252373  | 2.804438  | -0.643933 |
| C 0 | 1.944863  | 0.950611  | -0.518877 |
| C 0 | -0.252788 | 0.500463  | 0.198033  |
| C 0 | -1.352534 | -0.320237 | 0.829276  |
| N 0 | -2.288793 | 0.766856  | 1.186742  |
| C 0 | -1.985712 | 1.950363  | 0.495024  |
| O 0 | -3.639080 | 0.429477  | 1.308152  |
| C 0 | -4.101169 | 0.668342  | 2.653940  |
| C 0 | -1.939775 | -1.407258 | -0.093960 |
| S 0 | -2.546464 | -0.748431 | -1.704815 |
| C 0 | -4.182323 | -1.557030 | -1.891467 |
| C 0 | -5.244860 | -1.094346 | -0.882301 |
| C 0 | -6.604004 | -1.725612 | -1.220675 |
| O 0 | -5.413470 | 0.315459  | -0.862962 |
| O 0 | -6.749241 | -2.903154 | -1.473418 |
| O 0 | -7.628901 | -0.864433 | -1.194803 |
| O 0 | -2.734660 | 2.917175  | 0.369880  |
| O 0 | -0.486723 | 3.664073  | -1.508503 |
| O 0 | 2.444507  | 2.938825  | -1.690759 |
| C 0 | 0.815182  | 1.488675  | -2.769938 |
| C 0 | 3.107209  | 0.157966  | -1.102017 |
| C 0 | 3.818393  | -0.722837 | -0.065165 |
| C 0 | 4.985037  | -1.521636 | -0.659421 |
| C 0 | 5.713198  | -2.389744 | 0.374531  |
| C 0 | 6.875701  | -3.191091 | -0.220221 |
| H 0 | 0.776247  | 3.411655  | 0.111442  |
| H 0 | 2.260987  | 1.442879  | 0.410041  |
| H 0 | -0.991221 | -0.819874 | 1.736363  |
| H 0 | -4.021691 | 1.730562  | 2.897805  |
| H 0 | -3.528219 | 0.067262  | 3.365154  |
| H 0 | -5.147627 | 0.357205  | 2.651139  |
| H 0 | -2.761287 | -1.907211 | 0.422069  |
| H 0 | -1.156459 | -2.148163 | -0.274549 |
| H 0 | -4.082282 | -2.644038 | -1.853156 |

|     |           |           |           |
|-----|-----------|-----------|-----------|
| H 0 | -4.490832 | -1.281679 | -2.904974 |
| H 0 | -4.981304 | -1.458186 | 0.118752  |
| H 0 | -4.819418 | 0.668711  | -0.169616 |
| H 0 | -7.236469 | 0.013922  | -0.978806 |
| H 0 | -1.321549 | 3.868314  | -1.046344 |
| H 0 | 2.085183  | 3.694312  | -2.185984 |
| H 0 | 1.631377  | 1.034113  | -3.337477 |
| H 0 | 0.036578  | 0.735998  | -2.614242 |
| H 0 | 0.383095  | 2.297195  | -3.365154 |
| H 0 | 2.739610  | -0.461338 | -1.929372 |
| H 0 | 3.813137  | 0.878501  | -1.528991 |
| H 0 | 3.094773  | -1.414363 | 0.385618  |
| H 0 | 4.191041  | -0.088018 | 0.751887  |
| H 0 | 4.611513  | -2.161839 | -1.472405 |
| H 0 | 5.703459  | -0.828644 | -1.122097 |
| H 0 | 4.993219  | -3.078460 | 0.839087  |
| H 0 | 6.087836  | -1.748265 | 1.184909  |
| H 0 | 6.527096  | -3.868314 | -1.009880 |
| H 0 | 7.374414  | -3.798668 | 0.543773  |
| H 0 | 7.628901  | -2.527114 | -0.662454 |

Free Energy (PCM/B3LYP/6-31G\*) = -1757.65391  
Number of imaginary frequencies = 0

### 1-3R-c10

B3LYP/6-31G\* geometry

|     |           |           |           |
|-----|-----------|-----------|-----------|
| O 0 | 1.052881  | -1.063187 | -0.291914 |
| C 0 | 0.682578  | -3.419200 | -0.279065 |
| C 0 | 2.730507  | -2.575108 | 0.796718  |
| C 0 | 2.063098  | -3.812728 | 0.138890  |
| C 0 | 2.487452  | -1.356402 | -0.143271 |
| C 0 | 0.283592  | -2.142378 | -0.433091 |
| C 0 | -1.178630 | -2.049198 | -0.804971 |
| N 0 | -1.463756 | -3.489758 | -1.035976 |
| C 0 | -0.451392 | -4.303102 | -0.516577 |
| O 0 | -2.781010 | -3.921728 | -0.869390 |
| C 0 | -3.347459 | -4.285121 | -2.139159 |
| C 0 | -2.085841 | -1.456432 | 0.292327  |
| S 0 | -1.971015 | 0.370074  | 0.452169  |
| C 0 | -3.143381 | 0.939835  | -0.844495 |
| C 0 | -4.625801 | 0.924204  | -0.441357 |
| C 0 | -4.891279 | 1.724115  | 0.830695  |
| O 0 | -5.104677 | -0.392994 | -0.265035 |
| O 0 | -5.457031 | 1.246858  | 1.795535  |
| O 0 | -4.457669 | 2.986885  | 0.754762  |
| O 0 | -0.519049 | -5.519056 | -0.330705 |
| O 0 | 2.056770  | -4.913321 | 1.046042  |
| O 0 | 4.151747  | -2.748757 | 0.793127  |
| C 0 | 2.227181  | -2.339347 | 2.225113  |
| C 0 | 3.155631  | -0.058405 | 0.290074  |
| C 0 | 3.080188  | 1.051977  | -0.767455 |
| C 0 | 3.788313  | 2.339023  | -0.326265 |
| C 0 | 3.715364  | 3.461360  | -1.369489 |
| C 0 | 4.431790  | 4.742072  | -0.929156 |
| H 0 | 2.674606  | -4.072512 | -0.740311 |
| H 0 | 2.841684  | -1.638404 | -1.143574 |
| H 0 | -1.309294 | -1.490233 | -1.738600 |
| H 0 | -4.369720 | -4.595560 | -1.911700 |
| H 0 | -2.793529 | -5.116416 | -2.585883 |
| H 0 | -3.360989 | -3.431598 | -2.825141 |
| H 0 | -1.816729 | -1.872660 | 1.267251  |
| H 0 | -3.123397 | -1.713553 | 0.082785  |
| H 0 | -3.015243 | 0.333677  | -1.745589 |
| H 0 | -2.842703 | 1.962136  | -1.087875 |
| H 0 | -5.185665 | 1.417503  | -1.252766 |
| H 0 | -5.496493 | -0.419284 | 0.629456  |
| H 0 | -4.667866 | 3.433178  | 1.598517  |
| H 0 | 1.364213  | -5.523543 | 0.726020  |
| H 0 | 4.330598  | -3.578110 | 1.267754  |
| H 0 | 1.156764  | -2.114204 | 2.252021  |
| H 0 | 2.394880  | -3.237431 | 2.825141  |
| H 0 | 2.769958  | -1.507450 | 2.681212  |
| H 0 | 2.697216  | 0.288054  | 1.224354  |
| H 0 | 4.202508  | -0.291399 | 0.513392  |
| H 0 | 2.028935  | 1.272210  | -0.993090 |
| H 0 | 3.530174  | 0.691432  | -1.704019 |
| H 0 | 3.346780  | 2.692842  | 0.617313  |
| H 0 | 4.842901  | 2.116802  | -0.105169 |

H O 2.661029 3.686373 -1.584463  
H O 4.150039 3.105296 -2.314404  
H O 3.997838 5.140691 -0.003616  
H O 4.360200 5.523543 -1.694477  
H O 5.496493 4.555235 -0.741567  
Free Energy (PCM/B3LYP/6-31G\*) = -1757.653849  
Number of imaginary frequencies = 0

### 1-3R-c11

B3LYP/6-31G\* geometry

O O 0.388080 -0.693137 -0.793411  
C O -0.840011 -2.664398 -0.233195  
C O 0.904329 -1.920633 1.336885  
C O 0.090860 -3.144434 0.835511  
C O 1.466517 -1.179185 0.086607  
C O -0.632849 -1.533047 -0.934153  
C O -1.743521 -1.274016 -1.923851  
N O -2.726618 -2.282171 -1.484592  
C O -2.110006 -3.241614 -0.645773  
O O -3.524780 -2.796298 -2.521776  
C O -4.915184 -2.631990 -2.204828  
C O -2.282034 0.156120 -1.973120  
S O -3.038326 0.659025 -0.367297  
C O -3.023630 2.497463 -0.568677  
C O -4.382397 3.102237 -0.203698  
C O -4.660557 3.044079 1.312208  
O O -5.470376 2.536889 -0.928145  
O O -3.827689 3.296541 2.156502  
O O -5.925340 2.730082 1.619673  
O O -2.611419 -4.312299 -0.313298  
O O -0.596382 -3.748433 1.928127  
O O 2.070610 -2.384652 2.024751  
C O 0.072255 -1.010396 2.246669  
C O 2.353868 0.020877 0.388935  
C O 3.080248 0.571535 -0.846525  
C O 3.978874 1.770560 -0.518081  
C O 4.716133 2.331401 -1.740828  
C O 5.611369 3.529247 -1.406731  
H O 0.817770 -3.861444 0.422153  
H O 2.026511 -1.913486 -0.506264  
H O -1.399095 -1.530521 -2.936054  
H O -5.182812 -3.215644 -1.318970  
H O -5.448855 -3.014767 -3.078000  
H O -5.161972 -1.576867 -2.046867  
H O -3.022094 0.240825 -2.772538  
H O -1.449680 0.829929 -2.192861  
H O -2.798879 2.725523 -1.612837  
H O -2.250606 2.932958 0.066811  
H O -4.356053 4.167123 -0.465578  
H O -5.275814 1.581392 -1.020522  
H O -6.377754 2.555351 0.762406  
H O -1.252078 -4.355167 1.537730  
H O 1.755584 -2.962821 2.740152  
H O 0.701504 -0.214109 2.652480  
H O -0.332396 -1.593428 3.078000  
H O -0.767763 -0.554886 1.713446  
H O 1.745213 0.811229 0.844742  
H O 3.084032 -0.296350 1.141441  
H O 2.343197 0.864405 -1.605310  
H O 3.688192 -0.227222 -1.295855  
H O 3.370465 2.567251 -0.064774  
H O 4.713972 1.476124 0.245515  
H O 3.980522 2.624390 -2.503307  
H O 5.323962 1.534997 -2.193268  
H O 5.025620 4.355167 -0.984246  
H O 6.124726 3.906338 -2.298781  
H O 6.377754 3.256671 -0.670552  
Free Energy (PCM/B3LYP/6-31G\*) = -1757.65383  
Number of imaginary frequencies = 0

### 1-3R-c12

B3LYP/6-31G\* geometry

O O 1.880884 -1.093148 -0.472699  
C O 1.889069 -3.471534 -0.688021  
C O 3.907800 -2.397471 0.222734  
C O 3.364534 -3.651037 -0.513932  
C O 3.352933 -1.141331 -0.513068

C O 1.284743 -2.268517 -0.658353  
C O -0.215791 -2.383847 -0.796234  
N O -0.376054 -3.848589 -0.693797  
C O 0.870748 -4.497870 -0.845055  
O O -1.428596 -4.371181 -1.472260  
C O -2.256548 -5.230664 -0.673513  
C O -0.964658 -1.583893 0.272093  
S O -2.782629 -1.595727 -0.032121  
C O -3.338329 -0.372026 1.220125  
C O -3.232196 1.099403 0.792360  
C O -3.990028 1.386039 -0.500686  
O O -1.886930 1.500294 0.634901  
O O -3.464073 1.913359 -1.462111  
O O -5.274969 1.019113 -0.447398  
O O 1.020335 -5.705295 -1.019342  
O O 3.686473 -4.824464 0.228181  
O O 5.324242 -2.319697 0.035504  
C O 3.566256 -2.415060 1.716877  
C O 3.846782 0.197108 0.019353  
C O 3.462179 1.387300 -0.871183  
C O 3.974884 2.725715 -0.325035  
C O 3.597386 3.925630 -1.203123  
C O 4.109694 5.260412 -0.652120  
H O 3.869363 -3.688757 -1.492171  
H O 3.619692 -1.238143 -1.573299  
H O -0.526808 -2.059461 -1.798647  
H O -3.052331 -5.555939 -1.348161  
H O -2.683607 -4.684215 0.172967  
H O -1.687696 -6.096873 -0.323870  
H O -0.626660 -0.546677 0.247852  
H O -0.758548 -2.006428 1.260367  
H O -2.764284 -0.517909 2.139619  
H O -4.382202 -0.613356 1.436383  
H O -3.711022 1.700347 1.583192  
H O -1.827551 1.895945 -0.256284  
H O -5.691486 1.240528 -1.303425  
H O 3.155740 -5.545690 -0.157246  
H O 5.691486 -3.161612 0.354329  
H O 2.486683 -2.378727 1.891353  
H O 3.948416 -3.333279 2.170205  
H O 4.029168 -1.560457 2.216620  
H O 3.453786 0.349366 1.031913  
H O 4.936941 0.130451 0.104482  
H O 2.370259 1.429351 -0.974715  
H O 3.864235 1.227876 -1.882273  
H O 3.578175 2.880646 0.689315  
H O 5.069291 2.681802 -0.221378  
H O 2.503803 3.967594 -1.306475  
H O 3.994003 3.771207 -2.216620  
H O 3.702727 5.457906 0.347421  
H O 3.823481 6.096873 -1.300130  
H O 5.203763 5.260897 -0.570023  
Free Energy (PCM/B3LYP/6-31G\*) = -1757.653823  
Number of imaginary frequencies = 0

### 1-3R-c13

B3LYP/6-31G\* geometry

O O 1.473559 -1.103575 -0.516597  
C O 1.513407 -3.483252 -0.676443  
C O 3.473251 -2.370621 0.312638  
C O 2.979833 -3.644041 -0.423508  
C O 2.945212 -1.138898 -0.480310  
C O 0.892292 -2.286788 -0.703365  
C O -0.600025 -2.431506 -0.899702  
N O -0.736947 -3.895281 -0.745900  
C O 0.518382 -4.532215 -0.830603  
O O -1.773339 -4.460509 -1.509744  
C O -2.650139 -5.225982 -0.669442  
C O -1.487284 -1.678194 0.104388  
S O -1.672185 0.118486 -0.250595  
C O -3.119765 0.126411 -1.384934  
C O -4.491154 0.033489 -0.697986  
C O -4.690868 1.123504 0.351017  
O O -4.686557 -1.228335 -0.092741  
O O -4.996117 0.874047 1.501450  
O O -4.514002 2.356664 -0.134901  
O O 0.692177 -5.743873 -0.948841

|   |   |           |           |           |
|---|---|-----------|-----------|-----------|
| O | 0 | 3.272414  | -4.799727 | 0.357601  |
| O | 0 | 4.897053  | -2.282797 | 0.198722  |
| C | 0 | 3.053996  | -2.358076 | 1.786795  |
| C | 0 | 3.398888  | 0.217359  | 0.043122  |
| C | 0 | 3.066036  | 1.377798  | -0.905498 |
| C | 0 | 3.535575  | 2.735768  | -0.369020 |
| C | 0 | 3.221407  | 3.903959  | -1.312397 |
| C | 0 | 3.691754  | 5.258389  | -0.772052 |
| H | 0 | 3.534834  | -3.696833 | -1.373529 |
| H | 0 | 3.267619  | -1.258547 | -1.522615 |
| H | 0 | -0.877344 | -2.156978 | -1.925952 |
| H | 0 | -2.118565 | -6.071021 | -0.222184 |
| H | 0 | -3.432232 | -5.590859 | -1.339546 |
| H | 0 | -3.091370 | -4.602371 | 0.115065  |
| H | 0 | -1.077904 | -1.764078 | 1.114547  |
| H | 0 | -2.488443 | -2.109334 | 0.103933  |
| H | 0 | -3.027307 | -0.694106 | -2.101988 |
| H | 0 | -3.055139 | 1.063856  | -1.943349 |
| H | 0 | -5.254071 | 0.193744  | -1.477297 |
| H | 0 | -4.923016 | -1.046464 | 0.837537  |
| H | 0 | -4.663680 | 2.994529  | 0.590393  |
| H | 0 | 2.750924  | -5.528427 | -0.027462 |
| H | 0 | 5.254071  | -3.109316 | 0.565718  |
| H | 0 | 3.475969  | -1.483653 | 2.288576  |
| H | 0 | 1.966323  | -2.336698 | 1.903535  |
| H | 0 | 3.426518  | -3.258295 | 2.282396  |
| H | 0 | 2.941529  | 0.395767  | 1.024033  |
| H | 0 | 4.481814  | 0.160948  | 0.198767  |
| H | 0 | 1.982966  | 1.408142  | -1.081280 |
| H | 0 | 3.534290  | 1.190507  | -1.882845 |
| H | 0 | 3.066218  | 2.923079  | 0.608175  |
| H | 0 | 4.619691  | 2.699794  | -0.185034 |
| H | 0 | 2.138207  | 3.938809  | -1.496203 |
| H | 0 | 3.690716  | 3.716276  | -2.288576 |
| H | 0 | 3.212079  | 5.489980  | 0.187102  |
| H | 0 | 3.454479  | 6.071021  | -1.468363 |
| H | 0 | 4.776754  | 5.264279  | -0.609362 |

Free Energy (PCM/B3LYP/6-31G\*) = -1757.65367  
Number of imaginary frequencies = 0

**1-3R-c14**

B3LYP/6-31G\* geometry

|   |   |           |           |           |
|---|---|-----------|-----------|-----------|
| O | 0 | 0.576949  | -0.866104 | -0.900266 |
| C | 0 | -0.160075 | -3.066587 | -0.334004 |
| C | 0 | 1.447065  | -1.977331 | 1.178257  |
| C | 0 | 0.899943  | -3.343429 | 0.684818  |
| C | 0 | 1.774161  | -1.115298 | -0.077695 |
| C | 0 | -0.241187 | -1.908338 | -1.017030 |
| C | 0 | -1.428326 | -1.886827 | -1.950080 |
| N | 0 | -2.139876 | -3.095154 | -1.491560 |
| C | 0 | -1.289957 | -3.905326 | -0.704524 |
| O | 0 | -2.867076 | -3.755592 | -2.496204 |
| C | 0 | -4.242200 | -3.888219 | -2.105055 |
| C | 0 | -2.272534 | -0.611171 | -1.937159 |
| S | 0 | -3.071361 | -0.327920 | -0.302700 |
| C | 0 | -3.480703 | 1.453634  | -0.514763 |
| C | 0 | -4.571288 | 1.856414  | 0.494309  |
| C | 0 | -4.848286 | 3.353246  | 0.365826  |
| O | 0 | -4.212816 | 1.563416  | 1.827319  |
| O | 0 | -4.521688 | 4.154851  | 1.218843  |
| O | 0 | -5.449832 | 3.674344  | -0.786201 |
| O | 0 | -1.526042 | -5.065427 | -0.375622 |
| O | 0 | 0.410780  | -4.096483 | 1.791451  |
| O | 0 | 2.718294  | -2.180289 | 1.804709  |
| C | 0 | 0.479385  | -1.284531 | 2.144581  |
| C | 0 | 2.391526  | 0.246333  | 0.212191  |
| C | 0 | 2.939647  | 0.946161  | -1.039706 |
| C | 0 | 3.556169  | 2.316216  | -0.731563 |
| C | 0 | 4.134275  | 3.015442  | -1.968762 |
| C | 0 | 4.744766  | 4.385572  | -1.656467 |
| H | 0 | 1.747017  | -3.878668 | 0.227079  |
| H | 0 | 2.453175  | -1.702706 | -0.708916 |
| H | 0 | -1.084191 | -2.048491 | -2.981830 |
| H | 0 | -4.732570 | -4.361295 | -2.959202 |
| H | 0 | -4.691472 | -2.909606 | -1.907299 |
| H | 0 | -4.333941 | -4.527229 | -1.221585 |
| H | 0 | -3.037422 | -0.674619 | -2.716269 |

|   |   |           |           |           |
|---|---|-----------|-----------|-----------|
| H | 0 | -1.617893 | 0.235236  | -2.166219 |
| H | 0 | -3.847345 | 1.616572  | -1.532313 |
| H | 0 | -2.581157 | 2.059204  | -0.360831 |
| H | 0 | -5.490697 | 1.307287  | 0.261621  |
| H | 0 | -3.839113 | 2.385833  | 2.196252  |
| H | 0 | -5.561575 | 4.645218  | -0.811004 |
| H | 0 | -0.114036 | -4.826755 | 1.414780  |
| H | 0 | 2.573530  | -2.823113 | 2.519634  |
| H | 0 | -0.467075 | -1.021668 | 1.661903  |
| H | 0 | 0.256565  | -1.951156 | 2.981830  |
| H | 0 | 0.935459  | -0.372421 | 2.538203  |
| H | 0 | 3.199195  | 0.090452  | 0.935670  |
| H | 0 | 1.642234  | 0.883025  | 0.698279  |
| H | 0 | 2.134484  | 1.064883  | -1.776384 |
| H | 0 | 3.697863  | 0.302695  | -1.509224 |
| H | 0 | 2.794208  | 2.963274  | -0.272300 |
| H | 0 | 4.349623  | 2.197348  | 0.021287  |
| H | 0 | 3.342517  | 3.130248  | -2.722696 |
| H | 0 | 4.898189  | 2.369588  | -2.424456 |
| H | 0 | 3.995459  | 5.065427  | -1.232232 |
| H | 0 | 5.150554  | 4.857661  | -2.558675 |
| H | 0 | 5.561575  | 4.298022  | -0.929229 |

Free Energy (PCM/B3LYP/6-31G\*) = -1757.65346  
Number of imaginary frequencies = 0

**1-3R-c15**

B3LYP/6-31G\* geometry

|   |   |           |           |           |
|---|---|-----------|-----------|-----------|
| O | 0 | 0.477404  | 0.420551  | -0.330371 |
| C | 0 | 2.308392  | 1.929744  | -0.073945 |
| C | 0 | 0.534650  | 1.989654  | 1.633186  |
| C | 0 | 1.652191  | 2.814257  | 0.941352  |
| C | 0 | -0.325746 | 1.323389  | 0.518716  |
| C | 0 | 1.697871  | 0.852472  | -0.612843 |
| C | 0 | 2.582966  | 0.126697  | -1.594493 |
| N | 0 | 3.889054  | 0.775698  | -1.322595 |
| C | 0 | 3.651426  | 2.010013  | -0.602310 |
| O | 0 | 4.604252  | 0.989370  | -2.532515 |
| C | 0 | 5.977359  | 0.598809  | -2.404999 |
| C | 0 | 2.581951  | -1.402333 | -1.498861 |
| S | 0 | 2.791832  | -2.116392 | 0.185306  |
| C | 0 | 4.554801  | -2.661444 | 0.244557  |
| C | 0 | 5.451078  | -1.793723 | 1.130521  |
| C | 0 | 4.923580  | -1.751923 | 2.578977  |
| O | 0 | 5.664777  | -0.469727 | 0.659834  |
| O | 0 | 4.595200  | -2.742101 | 3.198580  |
| O | 0 | 4.883945  | -0.523213 | 3.106535  |
| O | 0 | 4.495453  | 2.883820  | -0.462870 |
| O | 0 | 2.563968  | 3.294617  | 1.924111  |
| O | 0 | -0.372929 | 2.884950  | 2.282380  |
| C | 0 | 1.105049  | 0.982609  | 2.638467  |
| C | 0 | -1.514755 | 0.509642  | 1.011292  |
| C | 0 | -2.466803 | 0.082464  | -0.114750 |
| C | 0 | -3.661478 | -0.733881 | 0.394155  |
| C | 0 | -4.623313 | -1.161058 | -0.721804 |
| C | 0 | -5.813176 | -1.980744 | -0.211925 |
| H | 0 | 1.161911  | 3.667679  | 0.447595  |
| H | 0 | -0.674267 | 2.121325  | -0.148504 |
| H | 0 | 2.284817  | 0.392561  | -2.618356 |
| H | 0 | 6.071870  | -0.471080 | -2.193456 |
| H | 0 | 6.481571  | 1.179941  | -1.628387 |
| H | 0 | 6.415158  | 0.823217  | -3.380399 |
| H | 0 | 3.342421  | -1.815073 | -2.166549 |
| H | 0 | 1.611184  | -1.760793 | -1.851756 |
| H | 0 | 4.953499  | -2.709101 | -0.771883 |
| H | 0 | 4.549136  | -3.673464 | 0.654457  |
| H | 0 | 6.435209  | -2.279106 | 1.177322  |
| H | 0 | 4.931491  | -0.194457 | 0.063250  |
| H | 0 | 5.192342  | 0.080069  | 2.388832  |
| H | 0 | 3.320542  | 3.673464  | 1.441968  |
| H | 0 | 0.157514  | 3.415688  | 2.900752  |
| H | 0 | 0.290506  | 0.470114  | 3.156461  |
| H | 0 | 1.741364  | 0.233235  | 2.157776  |
| H | 0 | 1.711259  | 1.508909  | 3.380399  |
| H | 0 | -1.148416 | -0.374750 | 1.546466  |
| H | 0 | -2.050457 | 1.127559  | 1.740187  |
| H | 0 | -1.913578 | -0.505560 | -0.858467 |
| H | 0 | -2.833159 | 0.978208  | -0.637055 |

H 0 -3.294108 -1.628639 0.918113  
H 0 -4.212649 -0.146081 1.143180  
H 0 -4.070292 -1.745181 -1.471039  
H 0 -4.991535 -0.266274 -1.243593  
H 0 -5.477253 -2.900692 0.282447  
H 0 -6.481571 -2.267845 -1.031896  
H 0 -6.403907 -1.410681 0.515991  
Free Energy (PCM/B3LYP/6-31G\*) = -1757.653339  
Number of imaginary frequencies = 0

### 1-3R-c16

B3LYP/6-31G\* geometry

O 0 1.897864 -1.049017 -0.855487  
C 0 1.588036 -3.404423 -0.608230  
C 0 3.410435 -2.351539 0.665939  
C 0 2.907697 -3.679876 0.040885  
C 0 3.293003 -1.242833 -0.422026  
C 0 1.199215 -2.173700 -0.992603  
C 0 -0.199363 -2.174274 -1.565329  
N 0 -0.613701 -3.554278 -1.240176  
C 0 0.504873 -4.337347 -0.875009  
O 0 -1.478046 -4.136723 -2.188866  
C 0 -2.616013 -4.716666 -1.531827  
C 0 -1.088518 -1.086911 -0.956749  
S 0 -2.718508 -1.018916 -1.811560  
C 0 -3.409817 0.539090 -1.137334  
C 0 -4.026425 0.402144 0.269918  
C 0 -4.654882 1.733436 0.679101  
O 0 -3.080662 0.024268 1.247511  
O 0 -4.187511 2.436175 1.554558  
O 0 -5.736248 2.045256 -0.045523  
O 0 0.503023 -5.561462 -0.763631  
O 0 2.821128 -4.684478 1.048024  
O 0 4.815727 -2.453437 0.916157  
C 0 2.662648 -2.004358 1.958121  
C 0 3.814016 0.127823 -0.011366  
C 0 3.917365 1.118422 -1.179915  
C 0 4.435750 2.494640 -0.744475  
C 0 4.552911 3.495268 -1.901386  
C 0 5.063510 4.870750 -1.459940  
H 0 3.654505 -3.981198 -0.710639  
H 0 3.835543 -1.595205 -1.308444  
H 0 -0.157624 -2.062054 -2.657577  
H 0 -2.305467 -5.533552 -0.874376  
H 0 -3.236367 -5.106881 -2.342445  
H 0 -3.169027 -3.958866 -0.968594  
H 0 -0.593737 -0.119525 -1.087963  
H 0 -1.236958 -1.265029 0.109151  
H 0 -4.183455 0.843290 -1.848442  
H 0 -2.629739 1.308136 -1.133756  
H 0 -4.813887 -0.359327 0.236375  
H 0 -2.829509 0.845746 1.711118  
H 0 -6.059352 2.919465 0.249560  
H 0 2.310524 -5.418354 0.659150  
H 0 4.938764 -3.235787 1.480212  
H 0 1.596180 -1.832491 1.783152  
H 0 2.756316 -2.829701 2.668602  
H 0 3.091579 -1.105552 2.408292  
H 0 3.161909 0.540068 0.768246  
H 0 4.800640 -0.021078 0.440944  
H 0 2.933314 1.231917 -1.652830  
H 0 4.585341 0.703067 -1.948403  
H 0 3.767027 2.907981 0.025081  
H 0 5.418552 2.378157 -0.263996  
H 0 3.571135 3.606732 -2.383364  
H 0 5.224353 3.084268 -2.668602  
H 0 4.393669 5.321804 -0.717291  
H 0 5.134567 5.561462 -2.308098  
H 0 6.059352 4.796497 -1.005659

Free Energy (PCM/B3LYP/6-31G\*) = -1757.653306  
Number of imaginary frequencies = 0

### 1-3R-c17

B3LYP/6-31G\* geometry

O 0 2.034499 -1.136730 -0.429357  
C 0 1.905225 -3.513475 -0.617636  
C 0 3.992636 -2.547454 0.257508

C 0 3.370375 -3.773973 -0.460936  
C 0 3.501250 -1.268084 -0.483055  
C 0 1.369270 -2.278196 -0.595102  
C 0 -0.139425 -2.310758 -0.690961  
N 0 -0.381274 -3.764637 -0.598939  
C 0 0.829666 -4.481297 -0.753509  
O 0 -1.445019 -4.229223 -1.399297  
C 0 -2.346952 -5.023751 -0.615848  
C 0 -0.797721 -1.483063 0.424677  
S 0 -2.626799 -1.386890 0.385607  
C 0 -2.884041 -0.325591 -1.100249  
C 0 -4.141749 0.530764 -0.926876  
C 0 -4.024424 1.529489 0.223070  
O 0 -5.270408 -0.290203 -0.709175  
O 0 -4.863844 1.615395 1.098944  
O 0 -2.939597 2.306706 0.136286  
O 0 0.910298 -5.696060 -0.921371  
O 0 3.636357 -4.957334 0.287478  
O 0 5.408976 -2.552714 0.053318  
C 0 3.669416 -2.532806 1.755927  
C 0 4.073940 0.044583 0.034610  
C 0 3.758419 1.245264 -0.868855  
C 0 4.346790 2.558142 -0.337272  
C 0 4.045146 3.766098 -1.233534  
C 0 4.630056 5.076294 -0.695977  
H 0 3.859104 -3.848274 -1.445205  
H 0 3.752314 -1.387041 -1.544893  
H 0 -0.465929 -1.955745 -1.676488  
H 0 -3.141225 -5.309155 -1.310356  
H 0 -2.764544 -4.440209 0.209973  
H 0 -1.844535 -5.919102 -0.238225  
H 0 -0.387188 -0.468919 0.404066  
H 0 -0.551764 -1.926097 1.394311  
H 0 -3.002533 -0.950007 -1.989458  
H 0 -2.012845 0.320456 -1.237092  
H 0 -4.270124 1.121830 -1.848576  
H 0 -5.730396 0.089201 0.064458  
H 0 -2.947675 2.925641 0.892617  
H 0 3.062856 -5.651556 -0.086177  
H 0 5.730396 -3.412022 0.375283  
H 0 2.596160 -2.431878 1.943871  
H 0 4.003255 -3.468037 2.212765  
H 0 4.187925 -1.702468 2.241832  
H 0 3.692067 0.229568 1.046010  
H 0 5.158532 -0.084191 0.119229  
H 0 2.670719 1.348766 -0.974140  
H 0 4.151094 1.051724 -1.877647  
H 0 3.955109 2.749644 0.672741  
H 0 5.436187 2.451167 -0.227041  
H 0 2.956517 3.869615 -1.345925  
H 0 4.439222 3.575503 -2.241832  
H 0 4.228235 5.310484 0.297656  
H 0 4.397559 5.919102 -1.357124  
H 0 5.721694 5.014432 -0.605408

Free Energy (PCM/B3LYP/6-31G\*) = -1757.65329  
Number of imaginary frequencies = 0

### 1-3R-c18

B3LYP/6-31G\* geometry

O 0 0.963785 0.218510 -0.052448  
C 0 -0.391331 2.184204 0.007789  
C 0 1.576836 2.192622 -1.475105  
C 0 0.571185 3.086079 -0.696428  
C 0 2.070538 1.076292 -0.505211  
C 0 -0.150790 0.884274 0.252008  
C 0 -1.308151 0.214874 0.951058  
N 0 -2.167923 1.390289 1.188127  
C 0 -1.740843 2.505836 0.464849  
O 0 -3.536494 1.180551 1.339035  
C 0 -3.938446 1.439344 2.695685  
C 0 -1.966980 -0.943127 0.176378  
S 0 -2.483445 -0.580569 -1.554023  
C 0 -4.300495 -0.363068 -1.412960  
C 0 -5.088803 -1.675155 -1.387538  
C 0 -6.595517 -1.378122 -1.520078  
O 0 -4.862508 -2.379939 -0.159796  
O 0 -7.067532 -0.762997 -2.452619

|     |           |           |           |
|-----|-----------|-----------|-----------|
| O 0 | -7.343097 | -1.850278 | -0.515657 |
| O 0 | -2.376044 | 3.545891  | 0.287425  |
| O 0 | -0.086919 | 3.985965  | -1.585891 |
| O 0 | 2.756244  | 2.952488  | -1.763252 |
| C 0 | 0.970683  | 1.639189  | -2.768566 |
| C 0 | 3.136951  | 0.147750  | -1.071763 |
| C 0 | 3.745071  | -0.794087 | -0.022886 |
| C 0 | 4.825233  | -1.713464 | -0.607259 |
| C 0 | 5.432058  | -2.671204 | 0.425942  |
| C 0 | 6.511124  | -3.586628 | -0.161987 |
| H 0 | 1.161561  | 3.665479  | 0.031763  |
| H 0 | 2.453563  | 1.572448  | 0.396190  |
| H 0 | -0.974506 | -0.200655 | 1.911874  |
| H 0 | -5.009491 | 1.227014  | 2.716261  |
| H 0 | -3.757365 | 2.485990  | 2.957403  |
| H 0 | -3.412463 | 0.779807  | 3.393509  |
| H 0 | -2.836398 | -1.310401 | 0.721636  |
| H 0 | -1.237091 | -1.755757 | 0.123944  |
| H 0 | -4.599295 | 0.206286  | -2.296725 |
| H 0 | -4.517656 | 0.235759  | -0.525242 |
| H 0 | -4.804068 | -2.291625 | -2.246335 |
| H 0 | -4.570988 | -3.282946 | -0.360303 |
| H 0 | -6.714529 | -2.293202 | 0.101149  |
| H 0 | -0.908850 | 4.260506  | -1.135073 |
| H 0 | 2.469733  | 3.722553  | -2.282766 |
| H 0 | 1.723519  | 1.073609  | -3.323573 |
| H 0 | 0.112869  | 0.988127  | -2.574962 |
| H 0 | 0.625628  | 2.467036  | -3.393509 |
| H 0 | 2.703944  | -0.440303 | -1.890064 |
| H 0 | 3.919780  | 0.777474  | -1.508356 |
| H 0 | 2.950132  | -1.404101 | 0.424974  |
| H 0 | 4.176440  | -0.197455 | 0.794023  |
| H 0 | 4.396462  | -2.298235 | -1.434549 |
| H 0 | 5.625539  | -1.101295 | -1.048892 |
| H 0 | 4.631252  | -3.283393 | 0.864545  |
| H 0 | 5.858135  | -2.087213 | 1.254047  |
| H 0 | 6.106363  | -4.205282 | -0.972616 |
| H 0 | 6.922078  | -4.260506 | 0.598629  |
| H 0 | 7.343097  | -3.002886 | -0.575144 |

Free Energy (PCM/B3LYP/6-31G\*) = -1757.653145  
Number of imaginary frequencies = 0

**1-3R-c19**

B3LYP/6-31G\* geometry

|     |           |           |           |
|-----|-----------|-----------|-----------|
| O 0 | -0.750725 | -1.083447 | -0.905551 |
| C 0 | -3.037791 | -1.558049 | -0.404991 |
| C 0 | -1.314260 | -2.731651 | 0.906038  |
| C 0 | -2.781394 | -2.790934 | 0.403979  |
| C 0 | -0.407347 | -2.390542 | -0.313844 |
| C 0 | -2.057732 | -0.834636 | -0.979069 |
| C 0 | -2.603751 | 0.352663  | -1.733683 |
| N 0 | -4.003219 | 0.336820  | -1.269807 |
| C 0 | -4.312822 | -0.910275 | -0.677475 |
| O 0 | -4.923212 | 0.802752  | -2.228035 |
| C 0 | -5.754109 | 1.827752  | -1.663302 |
| C 0 | -1.899885 | 1.699324  | -1.534185 |
| S 0 | -1.802059 | 2.275383  | 0.213525  |
| C 0 | -0.052533 | 1.915842  | 0.644750  |
| C 0 | 0.949963  | 2.889185  | -0.001222 |
| C 0 | 2.345065  | 2.598105  | 0.565372  |
| O 0 | 0.651902  | 4.249858  | 0.272417  |
| O 0 | 2.948471  | 1.572189  | 0.333753  |
| O 0 | 2.831582  | 3.551561  | 1.369801  |
| O 0 | -5.445706 | -1.305447 | -0.416146 |
| O 0 | -3.665055 | -2.910371 | 1.515340  |
| O 0 | -0.895150 | -4.043500 | 1.294288  |
| C 0 | -1.152092 | -1.752221 | 2.073631  |
| C 0 | 1.088654  | -2.355002 | -0.029560 |
| C 0 | 1.944986  | -2.266896 | -1.301071 |
| C 0 | 3.443974  | -2.145343 | -0.999595 |
| C 0 | 4.314211  | -2.107994 | -2.262414 |
| C 0 | 5.810469  | -1.975297 | -1.960117 |
| H 0 | -2.866551 | -3.689362 | -0.227673 |
| H 0 | -0.617903 | -3.132805 | -1.094005 |
| H 0 | -2.588801 | 0.133855  | -2.811924 |
| H 0 | -6.403863 | 2.143707  | -2.482944 |
| H 0 | -5.155762 | 2.675546  | -1.313120 |

|     |           |           |           |
|-----|-----------|-----------|-----------|
| H 0 | -6.357379 | 1.429980  | -0.842090 |
| H 0 | -2.448610 | 2.461129  | -2.092952 |
| H 0 | -0.892724 | 1.650510  | -1.956432 |
| H 0 | 0.198413  | 0.889370  | 0.374804  |
| H 0 | -0.012977 | 2.011681  | 1.734443  |
| H 0 | 0.997436  | 2.711824  | -1.083571 |
| H 0 | -0.319285 | 4.348456  | 0.272475  |
| H 0 | 2.164392  | 4.274668  | 1.385560  |
| H 0 | -4.562759 | -2.752222 | 1.170103  |
| H 0 | -1.528854 | -4.348456 | 1.965651  |
| H 0 | -0.118535 | -1.755533 | 2.428708  |
| H 0 | -1.426500 | -0.730765 | 1.792587  |
| H 0 | -1.803860 | -2.055169 | 2.897242  |
| H 0 | 1.312049  | -1.505547 | 0.627572  |
| H 0 | 1.337962  | -3.264455 | 0.527825  |
| H 0 | 1.625607  | -1.403547 | -1.898913 |
| H 0 | 1.764055  | -3.157902 | -1.919623 |
| H 0 | 3.618513  | -1.233084 | -0.411318 |
| H 0 | 3.759662  | -2.987762 | -0.366136 |
| H 0 | 3.993730  | -1.269583 | -2.897242 |
| H 0 | 4.138503  | -3.020263 | -2.850011 |
| H 0 | 6.020722  | -1.055074 | -1.401058 |
| H 0 | 6.403863  | -1.948928 | -2.881419 |
| H 0 | 6.168735  | -2.818438 | -1.356388 |

Free Energy (PCM/B3LYP/6-31G\*) = -1757.653139  
Number of imaginary frequencies = 0

**1-3R-c20**

B3LYP/6-31G\* geometry

|     |           |           |           |
|-----|-----------|-----------|-----------|
| O 0 | 1.175152  | -0.991402 | -0.108126 |
| C 0 | 0.494299  | -3.202895 | -0.695980 |
| C 0 | 2.871532  | -2.839051 | -0.178429 |
| C 0 | 1.868421  | -3.740205 | -0.945738 |
| C 0 | 2.537943  | -1.358875 | -0.530880 |
| C 0 | 0.256583  | -1.931934 | -0.317624 |
| C 0 | -1.211480 | -1.681737 | -0.059290 |
| N 0 | -1.739035 | -3.056549 | -0.167570 |
| C 0 | -0.770247 | -3.915403 | -0.740985 |
| O 0 | -3.018387 | -3.135119 | -0.761053 |
| C 0 | -3.885185 | -3.957200 | 0.034556  |
| C 0 | -1.439883 | -0.993411 | 1.292179  |
| S 0 | -3.185249 | -0.708149 | 1.792045  |
| C 0 | -3.957348 | 0.137211  | 0.360075  |
| C 0 | -3.417227 | 1.545388  | 0.058001  |
| C 0 | -4.273412 | 2.221658  | -1.012607 |
| O 0 | -2.077329 | 1.509043  | -0.392587 |
| O 0 | -3.826586 | 2.542582  | -2.097524 |
| O 0 | -5.540915 | 2.408099  | -0.630473 |
| O 0 | -0.991634 | -5.056476 | -1.142058 |
| O 0 | 2.009629  | -5.093064 | -0.520192 |
| O 0 | 4.185701  | -3.042493 | -0.707065 |
| C 0 | 2.854911  | -3.113073 | 1.329827  |
| C 0 | 3.474691  | -0.319279 | 0.069738  |
| C 0 | 3.254139  | 1.094782  | -0.486348 |
| C 0 | 4.218739  | 2.124420  | 0.115357  |
| C 0 | 4.014676  | 3.542397  | -0.433253 |
| C 0 | 4.980514  | 4.566931  | 0.171014  |
| H 0 | 2.126623  | -3.666215 | -2.014032 |
| H 0 | 2.545027  | -1.273166 | -1.624927 |
| H 0 | -1.631820 | -1.063773 | -0.861111 |
| H 0 | -3.983785 | -3.551310 | 1.045354  |
| H 0 | -4.849269 | -3.924327 | -0.479384 |
| H 0 | -3.516566 | -4.986467 | 0.066563  |
| H 0 | -0.905112 | -0.042538 | 1.281421  |
| H 0 | -1.035014 | -1.614373 | 2.097524  |
| H 0 | -5.013887 | 0.200789  | 0.636933  |
| H 0 | -3.879628 | -0.498274 | -0.526993 |
| H 0 | -3.480087 | 2.153005  | 0.970560  |
| H 0 | -2.097675 | 1.816204  | -1.320018 |
| H 0 | -6.023843 | 2.830351  | -1.368021 |
| H 0 | 1.229066  | -5.568442 | -0.859989 |
| H 0 | 4.368341  | -3.994385 | -0.630074 |
| H 0 | 3.627282  | -2.519721 | 1.825632  |
| H 0 | 1.887114  | -2.872417 | 1.780186  |
| H 0 | 3.056585  | -4.171602 | 1.513139  |
| H 0 | 3.354104  | -0.312792 | 1.159882  |
| H 0 | 4.499189  | -0.646895 | -0.138375 |



H O 2.219643 1.407191 -0.294111  
H O 3.375384 1.076615 -1.579264  
H O 4.099845 2.138806 1.208958  
H O 5.254924 1.807372 -0.074891  
H O 2.979156 3.858125 -0.242360  
H O 4.132823 3.527746 -1.526065  
H O 4.861270 4.628918 1.259903  
H O 4.810069 5.568442 -0.240621  
H O 6.023843 4.295434 -0.032628  
Free Energy (PCM/B3LYP/6-31G\*) = -1757.65312  
Number of imaginary frequencies = 0

### 1-3R-c21

B3LYP/6-31G\* geometry

O O -0.502745 0.376571 -0.734576  
C O 0.702406 2.435057 -0.598326  
C O -1.249111 2.152490 0.875602  
C O -0.338985 3.190001 0.165288  
C O -1.668664 1.087271 -0.181778  
C O 0.553808 1.150030 -0.973404  
C O 1.771136 0.633542 -1.703239  
N O 2.708646 1.745622 -1.461241  
C O 2.024507 2.891076 -1.006119  
O O 3.661162 1.940799 -2.473092  
C O 4.988740 1.863437 -1.928777  
C O 2.294158 -0.740241 -1.281216  
S O 2.795502 -0.777854 0.492366  
C O 3.312183 -2.531769 0.662161  
C O 4.727697 -2.843294 0.154976  
C O 5.783812 -1.935650 0.779284  
O O 4.804424 -2.736840 -1.251342  
O O 6.567632 -1.289679 0.109055  
O O 5.767424 -1.953087 2.115702  
O O 2.502525 4.021081 -0.930620  
O O 0.224933 4.077727 1.127649  
O O -2.478434 2.785230 1.246707  
C O -0.572484 1.537052 2.105120  
C O -2.629947 0.018142 0.320408  
C O -3.210079 -0.857021 -0.800037  
C O -4.171303 -1.929780 -0.273480  
C O -4.771703 -2.806119 -1.380449  
C O -5.726458 -3.879329 -0.847454  
H O -0.984271 3.761224 -0.520842  
H O -2.120105 1.623911 -1.026008  
H O 1.553442 0.581946 -2.779989  
H O 5.650315 1.993097 2.788704  
H O 5.170593 0.891836 -1.458024  
H O 5.157199 2.667229 -1.205707  
H O 3.150594 -1.012964 -1.898336  
H O 1.502862 -1.478995 -1.443087  
H O 2.597625 -3.174868 0.140340  
H O 3.250414 -2.757982 1.729792  
H O 4.965172 -3.873719 0.468877  
H O 5.589112 -2.185600 -1.436668  
H O 6.472755 -1.357955 2.437733  
H O 0.941106 4.556214 0.670752  
H O -2.239578 3.544190 1.805511  
H O 0.313071 0.952875 1.837224  
H O -0.259495 2.330508 2.788704  
H O -1.275691 0.883835 2.628107  
H O -2.113304 -0.612164 1.054298  
H O -3.439958 0.530878 0.850646  
H O -2.391602 -1.338185 -1.351033  
H O -3.737138 -0.217279 -1.522734  
H O -3.641788 -2.569562 0.447960  
H O -4.984697 -1.445852 0.287497  
H O -3.958190 -3.286285 -1.942642  
H O -5.303287 -2.166527 -2.099309  
H O -5.212668 -4.556214 -0.153620  
H O -6.140072 -4.486440 -1.660991  
H O -6.567632 -3.427516 -0.306998  
Free Energy (PCM/B3LYP/6-31G\*) = -1757.653085  
Number of imaginary frequencies = 0

### 1-3R-c22

B3LYP/6-31G\* geometry

O O 1.813694 -0.775620 -0.595641

C O 2.549928 -3.047960 -0.568585  
C O 3.997452 -1.364132 0.492317  
C O 3.968001 -2.759710 -0.185823  
C O 3.223084 -0.375837 -0.429712  
C O 1.624542 -2.084805 -0.739435  
C O 0.263296 -2.658564 -1.060132  
N O 0.519770 -4.093018 -0.827457  
C O 1.911600 -4.341629 -0.753413  
O O -0.203358 -4.949166 -1.683700  
C O -0.834974 -5.992311 -0.924539  
C O -0.843832 -2.063116 -0.184688  
S O -2.498726 -2.686259 -0.698090  
C O -3.592716 -1.661685 0.357534  
C O -3.685257 -0.192268 -0.099655  
C O -4.773515 0.508286 0.722268  
O O -4.036024 -0.067637 -1.469912  
O O -4.657263 0.737489 1.906777  
O O -5.881687 0.813399 0.034842  
O O 2.430023 -5.454531 -0.788859  
O O 4.503087 -3.736614 0.702613  
O O 5.340127 -0.870440 0.491121  
C O 3.445065 -1.408405 1.921595  
C O 3.211626 1.074677 0.033340  
C O 2.667387 2.046798 -1.023157  
C O 2.672944 3.504697 -0.546783  
C O 2.143734 4.489069 -1.597719  
C O 2.148793 5.943935 -1.117193  
H O 4.605438 -2.692814 -1.081526  
H O 3.671192 -0.441785 -1.429256  
H O 0.028732 -2.503284 -2.121906  
H O -1.388580 -6.576951 -1.663274  
H O -1.524460 -5.574330 -0.184767  
H O -0.085044 -6.621492 -0.437343  
H O -0.817582 -0.975326 -0.291257  
H O -0.668535 -2.322502 0.863304  
H O -3.273436 -1.709993 1.401517  
H O -4.575471 -2.137173 0.276525  
H O -2.740071 0.324946 0.109066  
H O -3.621771 -0.808952 -1.952665  
H O -5.718366 0.539887 -0.896372  
H O 4.288543 -4.605671 0.316952  
H O 5.881687 -1.544273 0.936198  
H O 3.543492 -0.427055 2.392512  
H O 2.391593 -1.703390 1.945677  
H O 4.009400 -2.135779 2.510908  
H O 2.619128 1.153729 0.952911  
H O 4.242198 1.341896 0.291202  
H O 1.645156 1.755863 -1.297591  
H O 3.271097 1.960435 -1.938240  
H O 2.068065 3.591262 0.367992  
H O 3.696735 3.791413 -0.264061  
H O 1.121657 4.200230 -1.881130  
H O 2.749533 4.402759 -2.510908  
H O 1.522650 6.067969 -0.224881  
H O 1.766873 6.621492 -1.889560  
H O 3.163269 6.271393 -0.857789  
Free Energy (PCM/B3LYP/6-31G\*) = -1757.653044  
Number of imaginary frequencies = 0

### 1-3R-c23

B3LYP/6-31G\* geometry

O O -0.285112 -0.438591 0.060624  
C O 1.184801 -2.282550 -0.316937  
C O -0.580880 -1.860962 -1.984141  
C O 0.381591 -2.931668 -1.398721  
C O -1.266345 -1.134516 -0.787603  
C O 0.826341 -1.137897 0.290618  
C O 1.844601 -0.696642 1.312563  
N O 2.742493 -1.867532 1.287662  
C O 2.490106 -2.695613 0.193681  
O O 4.058743 -1.692854 1.707824  
C O 4.284252 -2.389396 2.946078  
C O 2.527660 0.655407 1.022046  
S O 3.185002 0.927071 -0.669099  
C O 4.878381 0.198168 -0.582490  
C O 5.815304 0.961120 -1.521379  
C O 6.021707 2.415914 -1.105146

|   |   |           |           |           |
|---|---|-----------|-----------|-----------|
| O | 0 | 5.324289  | 0.926182  | -2.846053 |
| O | 0 | 5.871996  | 3.343299  | -1.877801 |
| O | 0 | 6.418777  | 2.548269  | 0.165366  |
| O | 0 | 3.221867  | -3.594621 | -0.224399 |
| O | 0 | 1.205148  | -3.476376 | -2.427833 |
| O | 0 | -1.659137 | -2.518286 | -2.660193 |
| C | 0 | 0.138227  | -0.898661 | -2.934489 |
| C | 0 | -2.321664 | -0.103888 | -1.167027 |
| C | 0 | -3.123231 | 0.414567  | 0.035335  |
| C | 0 | -4.198517 | 1.434380  | -0.359854 |
| C | 0 | -5.007320 | 1.956794  | 0.834270  |
| C | 0 | -6.083672 | 2.972377  | 0.437270  |
| H | 0 | -0.252228 | -3.731420 | -0.982706 |
| H | 0 | -1.718106 | -1.907329 | -0.151629 |
| H | 0 | 1.375171  | -0.609651 | 2.301830  |
| H | 0 | 5.324737  | -2.177181 | 3.201438  |
| H | 0 | 4.142159  | -3.466030 | 2.813461  |
| H | 0 | 3.621931  | -2.016099 | 3.733942  |
| H | 0 | 3.319229  | 0.824137  | 1.755744  |
| H | 0 | 1.774147  | 1.436001  | 1.162366  |
| H | 0 | 4.851434  | -0.852349 | -0.880202 |
| H | 0 | 5.243356  | 0.254653  | 0.443844  |
| H | 0 | 6.803643  | 0.474910  | -1.466623 |
| H | 0 | 5.379110  | 1.843746  | -3.176003 |
| H | 0 | 6.549177  | 3.500075  | 0.344642  |
| H | 0 | 1.989270  | -3.849367 | -1.980519 |
| H | 0 | -1.257582 | -3.056472 | -3.363014 |
| H | 0 | 0.911179  | -0.318347 | -2.421880 |
| H | 0 | 0.621167  | -1.466797 | -3.733942 |
| H | 0 | -0.580958 | -0.208413 | -3.383351 |
| H | 0 | -1.838028 | 0.735645  | -1.681351 |
| H | 0 | -2.995110 | -0.578010 | -1.889281 |
| H | 0 | -2.438611 | 0.869428  | 0.762852  |
| H | 0 | -3.598395 | -0.435677 | 0.546294  |
| H | 0 | -3.724675 | 2.283020  | -0.875262 |
| H | 0 | -4.882915 | 0.977442  | -1.090124 |
| H | 0 | -4.322335 | 2.415342  | 1.561637  |
| H | 0 | -5.477443 | 1.108101  | 1.351192  |
| H | 0 | -5.640135 | 3.849367  | -0.050496 |
| H | 0 | -6.642807 | 3.324740  | 1.311786  |
| H | 0 | -6.803643 | 2.532562  | -0.264120 |

Free Energy (PCM/B3LYP/6-31G\*) = -1757.653042  
Number of imaginary frequencies = 0

### 1-3R-c24

B3LYP/6-31G\* geometry

|   |   |           |           |           |
|---|---|-----------|-----------|-----------|
| O | 0 | 1.407494  | -0.717396 | -0.687697 |
| C | 0 | 0.658676  | -2.983397 | -0.780715 |
| C | 0 | 2.744118  | -2.517656 | 0.440797  |
| C | 0 | 1.941524  | -3.603431 | -0.323776 |
| C | 0 | 2.765440  | -1.235050 | -0.442911 |
| C | 0 | 0.493609  | -1.654944 | -0.926824 |
| C | 0 | -0.915044 | -1.302101 | -1.346106 |
| N | 0 | -1.570079 | -2.617217 | -1.198001 |
| C | 0 | -0.603192 | -3.642577 | -1.077052 |
| O | 0 | -2.592289 | -2.861271 | -2.137449 |
| C | 0 | -3.778802 | -3.319383 | -1.470552 |
| C | 0 | -1.526547 | -0.189109 | -0.490114 |
| S | 0 | -3.167907 | 0.325573  | -1.141307 |
| C | 0 | -3.475810 | 1.756559  | -0.023685 |
| C | 0 | -4.979332 | 2.022438  | 0.089706  |
| C | 0 | -5.736004 | 0.867617  | 0.744169  |
| O | 0 | -5.534622 | 2.271607  | -1.184984 |
| O | 0 | -6.708655 | 0.351017  | 0.227993  |
| O | 0 | -5.242707 | 0.524921  | 1.938867  |
| O | 0 | -0.838617 | -4.845731 | -1.160188 |
| O | 0 | 1.731492  | -4.731809 | 0.520894  |
| O | 0 | 4.116108  | -2.916390 | 0.518623  |
| C | 0 | 2.180905  | -2.267403 | 1.844663  |
| C | 0 | 3.580238  | -0.075188 | 0.113484  |
| C | 0 | 3.782742  | 1.066203  | -0.893380 |
| C | 0 | 4.635298  | 2.210017  | -0.330286 |
| C | 0 | 4.855549  | 3.352301  | -1.330417 |
| C | 0 | 5.715051  | 4.489034  | -0.768032 |
| H | 0 | 2.555584  | -3.904223 | -1.187303 |
| H | 0 | 3.157083  | -1.522394 | -1.426970 |
| H | 0 | -0.929885 | -1.012345 | -2.405685 |

|   |   |           |           |           |
|---|---|-----------|-----------|-----------|
| H | 0 | -3.595483 | -4.275931 | -0.972919 |
| H | 0 | -4.513550 | -3.450084 | -2.268832 |
| H | 0 | -4.134601 | -2.573976 | -0.752883 |
| H | 0 | -0.853715 | 0.673470  | -0.514207 |
| H | 0 | -1.625350 | -0.531794 | 0.544386  |
| H | 0 | -2.983066 | 2.648934  | -0.419396 |
| H | 0 | -3.063820 | 1.537733  | 0.964789  |
| H | 0 | -5.112057 | 2.899869  | 0.743479  |
| H | 0 | -6.327670 | 1.704699  | -1.246536 |
| H | 0 | -5.788860 | -0.202773 | 2.295734  |
| H | 0 | 1.066272  | -5.287412 | 0.074684  |
| H | 0 | 4.124278  | -3.791729 | 0.941769  |
| H | 0 | 1.159582  | -1.875418 | 1.814112  |
| H | 0 | 2.163092  | -3.205320 | 2.405685  |
| H | 0 | 2.812741  | -1.553236 | 2.378779  |
| H | 0 | 3.091435  | 0.307947  | 1.017568  |
| H | 0 | 4.551442  | -0.478789 | 0.420059  |
| H | 0 | 2.806121  | 1.457568  | -1.206285 |
| H | 0 | 4.262153  | 0.667450  | -1.799254 |
| H | 0 | 4.157320  | 2.609441  | 0.576586  |
| H | 0 | 5.610963  | 1.813768  | -0.011878 |
| H | 0 | 3.880317  | 3.750516  | -1.644670 |
| H | 0 | 5.328031  | 2.950974  | -2.238276 |
| H | 0 | 5.251226  | 4.934136  | 0.121107  |
| H | 0 | 5.854768  | 5.287412  | -1.506021 |
| H | 0 | 6.708655  | 4.126486  | -0.476543 |

Free Energy (PCM/B3LYP/6-31G\*) = -1757.653021  
Number of imaginary frequencies = 0

### 1-3R-c25

B3LYP/6-31G\* geometry

|   |   |           |           |           |
|---|---|-----------|-----------|-----------|
| O | 0 | -0.756794 | -1.169630 | -0.917268 |
| C | 0 | -3.040775 | -1.680445 | -0.439260 |
| C | 0 | -1.313257 | -2.811316 | 0.900774  |
| C | 0 | -2.773289 | -2.900982 | 0.384136  |
| C | 0 | -0.402152 | -2.468245 | -0.315457 |
| C | 0 | -2.067199 | -0.941979 | -1.005631 |
| C | 0 | -2.625563 | 0.234287  | -1.768175 |
| N | 0 | -4.031047 | 0.190648  | -1.322603 |
| C | 0 | -4.324243 | -1.057239 | -0.727484 |
| O | 0 | -4.949939 | 0.640080  | -2.289016 |
| C | 0 | -5.791117 | 1.663888  | -1.737527 |
| C | 0 | -1.953192 | 1.594430  | -1.551553 |
| S | 0 | -1.887597 | 2.161853  | 0.200090  |
| C | 0 | -0.113300 | 1.908581  | 0.598956  |
| C | 0 | 0.813489  | 3.033382  | 0.089900  |
| C | 0 | 2.259276  | 2.682003  | 0.436253  |
| O | 0 | 0.497268  | 4.288148  | 0.648295  |
| O | 0 | 2.889323  | 3.270145  | 1.293490  |
| O | 0 | 2.733264  | 1.649828  | -0.275004 |
| O | 0 | -5.452449 | -1.472392 | -0.473897 |
| O | 0 | -3.668121 | -3.023983 | 1.486416  |
| O | 0 | -0.877232 | -4.111811 | 1.309231  |
| C | 0 | -1.177475 | -1.814789 | 2.057136  |
| C | 0 | 1.090901  | -2.419821 | -0.019738 |
| C | 0 | 1.958567  | -2.306254 | -1.281126 |
| C | 0 | 3.459217  | -2.265623 | -0.966720 |
| C | 0 | 4.339786  | -2.173605 | -2.219323 |
| C | 0 | 5.838192  | -2.131380 | -1.902073 |
| H | 0 | -2.836122 | -3.807478 | -0.238685 |
| H | 0 | -0.599212 | -3.218069 | -1.092157 |
| H | 0 | -2.593215 | 0.016433  | -2.846274 |
| H | 0 | -6.438581 | 1.968838  | -2.563174 |
| H | 0 | -5.200487 | 2.518530  | -1.390942 |
| H | 0 | -6.396235 | 1.268929  | -0.916205 |
| H | 0 | -2.507062 | 2.344245  | -2.121853 |
| H | 0 | -0.937941 | 1.566016  | -1.956553 |
| H | 0 | 0.201336  | 0.937696  | 0.209874  |
| H | 0 | -0.063024 | 1.873510  | 1.691934  |
| H | 0 | 0.732188  | 3.107540  | -1.000909 |
| H | 0 | 1.123734  | 4.419651  | 1.384975  |
| H | 0 | 3.646322  | 1.469977  | 0.024135  |
| H | 0 | -4.563141 | -2.874936 | 1.129875  |
| H | 0 | -1.515021 | -4.419651 | 1.975392  |
| H | 0 | -1.449341 | -0.798494 | 1.755921  |
| H | 0 | -1.842659 | -2.109511 | 2.873006  |
| H | 0 | -0.150312 | -1.809403 | 2.430464  |

H O 1.342670 -3.335980 0.525641  
H O 1.300908 -1.578848 0.652441  
H O 1.679512 -1.402973 -1.838623  
H O 1.747055 -3.158495 -1.943061  
H O 3.668984 -1.406852 -0.311709  
H O 3.736501 -3.162113 -0.392500  
H O 4.061355 -1.277426 -2.791923  
H O 4.127710 -3.031444 -2.873006  
H O 6.085610 -1.266393 -1.274031  
H O 6.438581 -2.061847 -2.816489  
H O 6.154395 -3.032953 -1.362823  
Free Energy (PCM/B3LYP/6-31G\*) = -1757.652893  
Number of imaginary frequencies = 0

### 1-3R-c26

B3LYP/6-31G\* geometry  
O O 0.925223 -0.675489 -0.128909  
C O -0.065193 -2.796359 -0.599968  
C O 2.336600 -2.749345 -0.066762  
C O 1.217585 -3.541417 -0.793111  
C O 2.222765 -1.260203 -0.509100  
C O -0.119465 -1.484129 -0.300417  
C O -1.535636 -1.006612 -0.081133  
N O -2.259457 -2.294450 -0.136202  
C O -1.420918 -3.318271 -0.634734  
O O -3.530833 -2.226936 -0.742232  
C O -4.518134 -2.826789 0.106881  
C O -1.686129 -0.259228 1.251335  
S O -3.350000 0.445565 1.592918  
C O -3.197735 2.190974 1.037898  
C O -3.363780 2.454897 -0.461281  
C O -4.641024 1.860892 -1.048892  
O O -2.250844 1.964263 -1.180986  
O O -4.644155 1.208697 -2.074822  
O O -5.736777 2.177495 -0.349390  
O O -1.801679 -4.436251 -0.977141  
O O 1.157510 -4.871014 -0.282469  
O O 3.609751 -3.171053 -0.566573  
C O 2.275851 -2.926388 1.454596  
C O 3.295851 -0.331906 0.044329  
C O 3.303465 1.053436 -0.617637  
C O 4.394055 1.973447 -0.055036  
C O 4.423252 3.356911 -0.717198  
C O 5.513650 4.273030 -0.152143  
H O 1.491761 -3.573806 -1.859544  
H O 2.249874 -1.242440 -1.606142  
H O -1.863713 -0.361392 -0.902483  
H O -4.306945 -3.889780 0.255915  
H O -5.460636 -2.707827 -0.433605  
H O -4.574920 -2.311845 1.071161  
H O -0.956272 0.553552 1.294421  
H O -1.474824 -0.947445 2.074822  
H O -2.230492 2.586962 1.361030  
H O -3.977117 2.729883 1.582793  
H O -3.445149 3.548940 -0.584793  
H O -2.602208 1.640626 -2.032369  
H O -6.510014 1.786894 -0.802022  
H O 0.323725 -5.252543 -0.613992  
H O 3.648785 -4.134561 -0.442335  
H O 3.121575 -2.416809 1.923315  
H O 2.326898 -3.989375 1.704343  
H O 1.349484 -2.526659 1.878411  
H O 3.155777 -0.225824 1.126960  
H O 4.263046 -0.823374 -0.107979  
H O 2.322108 1.527807 -0.487516  
H O 3.449897 0.935062 -1.701100  
H O 4.246221 2.093421 1.028492  
H O 5.375668 1.491911 -0.177620  
H O 3.441821 3.836849 -0.595011  
H O 4.571042 3.236329 -1.799790  
H O 5.373419 4.438783 0.923295  
H O 5.507235 5.252543 -0.644128  
H O 6.510014 3.835661 -0.292451  
Free Energy (PCM/B3LYP/6-31G\*) = -1757.652891  
Number of imaginary frequencies = 0

### 1-3R-c27

B3LYP/6-31G\* geometry  
O O -0.638643 -0.799052 -0.878377  
C O -2.870083 -1.495021 -0.391017  
C O -1.043684 -2.471079 0.948416  
C O -2.500967 -2.672119 0.457347  
C O -0.182357 -2.079337 -0.288227  
C O -1.973161 -0.683488 -0.976686  
C O -2.637688 0.406525 -1.785282  
N O -4.033435 0.240760 -1.333537  
C O -4.210790 -1.008193 -0.703556  
O O -4.995944 0.597472 -2.291378  
C O -5.908493 1.561995 -1.742994  
C O -2.111719 1.833831 -1.626349  
S O -2.200770 2.433596 0.119190  
C O -0.592472 3.302655 0.300786  
C O 0.597359 2.372403 0.555262  
C O 1.847770 3.184172 0.934103  
O O 0.935509 1.583103 -0.584056  
O O 1.833174 4.080446 1.750648  
O O 2.967309 2.804809 0.305630  
O O -5.292384 -1.524468 -0.440437  
O O -3.366257 -2.832165 1.576944  
O O -0.507640 -3.731028 1.361175  
C O -0.957918 -1.452189 2.089805  
C O 1.311502 -1.941150 -0.029528  
C O 2.149314 -1.812799 -1.310513  
C O 3.648107 -1.660651 -1.022130  
C O 4.503372 -1.562579 -2.291767  
C O 5.998522 -1.399860 -1.999031  
H O -2.509699 -3.592897 -0.146976  
H O -0.354846 -2.833704 -1.065258  
H O -2.580547 0.147356 -2.852996  
H O -6.581651 1.809885 -2.566918  
H O -5.378677 2.459701 -1.407756  
H O -6.476475 1.129629 -0.914129  
H O -2.703652 2.494247 -2.265207  
H O -1.073862 1.879497 -1.960538  
H O -0.714714 3.964092 1.161982  
H O -0.409218 3.924673 -0.580336  
H O 0.372025 1.729491 1.415963  
H O 0.433642 0.744945 -0.568619  
H O 2.706419 2.081970 -0.309656  
H O -4.275808 -2.796469 1.228575  
H O -1.111648 -4.080446 2.038288  
H O 0.074264 -1.365289 2.438951  
H O -1.313185 -0.462992 1.784856  
H O -1.579802 -1.785698 2.924477  
H O 1.491897 -1.079156 0.624777  
H O 1.622272 -2.829734 0.529997  
H O 1.805558 -0.951514 -1.898246  
H O 1.984402 -2.700232 -1.937853  
H O 3.809568 -0.763834 -0.405694  
H O 3.991373 -2.512929 -0.417282  
H O 4.154626 -0.714690 -2.898337  
H O 4.345043 -2.461568 -2.903960  
H O 6.190269 -0.491667 -1.414159  
H O 6.581651 -1.330007 -2.924477  
H O 6.384320 -2.251154 -1.424514  
Free Energy (PCM/B3LYP/6-31G\*) = -1757.652866  
Number of imaginary frequencies = 0

### 1-3R-c28

B3LYP/6-31G\* geometry  
O O 0.976163 -0.587410 -0.211606  
C O -0.074203 -2.699321 -0.588000  
C O 2.322552 -2.697103 -0.027757  
C O 1.188675 -3.490397 -0.729674  
C O 2.262757 -1.228400 -0.542996  
C O -0.087651 -1.372526 -0.352180  
C O -1.491413 -0.838398 -0.180555  
N O -2.250058 -2.105779 -0.144275  
C O -1.444613 -3.179460 -0.609788  
O O -3.531483 -2.033016 -0.743472  
C O -4.515333 -2.658667 0.105095  
C O -1.648483 0.020161 1.080639  
S O -3.335132 0.664957 1.414102  
C O -3.528810 1.976029 0.130288

|     |           |           |           |
|-----|-----------|-----------|-----------|
| C 0 | -4.517834 | 1.626622  | -0.982971 |
| C 0 | -5.953669 | 1.451924  | -0.451181 |
| O 0 | -4.155356 | 0.520204  | -1.799478 |
| O 0 | -6.410985 | 2.068012  | 0.487303  |
| O 0 | -6.687812 | 0.577850  | -1.156853 |
| O 0 | -1.868975 | -4.291643 | -0.907209 |
| O 0 | 1.089288  | -4.789597 | -0.153421 |
| O 0 | 3.586723  | -3.182833 | -0.488501 |
| C 0 | 2.236310  | -2.797776 | 1.499613  |
| C 0 | 3.354780  | -0.308755 | -0.013757 |
| C 0 | 3.408043  | 1.050923  | -0.724924 |
| C 0 | 4.520202  | 1.957311  | -0.182700 |
| C 0 | 4.591405  | 3.319694  | -0.884232 |
| C 0 | 5.703324  | 4.221151  | -0.337796 |
| H 0 | 1.471541  | -3.581630 | -1.789997 |
| H 0 | 2.305180  | -1.262460 | -1.638900 |
| H 0 | -1.781919 | -0.265161 | -1.070535 |
| H 0 | -5.465892 | -2.506194 | -0.410810 |
| H 0 | -4.535583 | -2.179740 | 1.087261  |
| H 0 | -4.300968 | -3.725412 | 0.195358  |
| H 0 | -0.947321 | 0.858527  | 1.036917  |
| H 0 | -1.402127 | -0.579279 | 1.961918  |
| H 0 | -2.549215 | 2.198586  | -0.299986 |
| H 0 | -3.887317 | 2.872561  | 0.640178  |
| H 0 | -4.553187 | 2.487206  | -1.664671 |
| H 0 | -3.980018 | -0.270271 | -1.240729 |
| H 0 | -6.091618 | 0.206416  | -1.844829 |
| H 0 | 0.270508  | -5.185408 | -0.502998 |
| H 0 | 3.594313  | -4.139231 | -0.313170 |
| H 0 | 1.321190  | -2.343079 | 1.891150  |
| H 0 | 2.244025  | -3.848726 | 1.799760  |
| H 0 | 3.095410  | -2.298521 | 1.954593  |
| H 0 | 3.208031  | -0.159033 | 1.062768  |
| H 0 | 4.308835  | -0.832739 | -0.137956 |
| H 0 | 2.439971  | 1.557694  | -0.620513 |
| H 0 | 3.560433  | 0.890348  | -1.802084 |
| H 0 | 4.369181  | 2.113097  | 0.895821  |
| H 0 | 5.488806  | 1.445732  | -0.284504 |
| H 0 | 3.622912  | 3.829614  | -0.782135 |
| H 0 | 4.742363  | 3.164197  | -1.961918 |
| H 0 | 5.560127  | 4.422632  | 0.731128  |
| H 0 | 5.728161  | 5.185408  | -0.858448 |
| H 0 | 6.687812  | 3.751898  | -0.457146 |

Free Energy (PCM/B3LYP/6-31G\*) = -1757.65286  
Number of imaginary frequencies = 0

**1-3R-c29**

B3LYP/6-31G\* geometry

|     |           |           |           |
|-----|-----------|-----------|-----------|
| O 0 | -0.757199 | -1.168994 | -0.917270 |
| C 0 | -3.041322 | -1.679255 | -0.439343 |
| C 0 | -1.314190 | -2.810890 | 0.900464  |
| C 0 | -2.774181 | -2.900145 | 0.383619  |
| C 0 | -0.402859 | -2.467761 | -0.315587 |
| C 0 | -2.067532 | -0.940949 | -1.005548 |
| C 0 | -2.625589 | 0.235700  | -1.767753 |
| N 0 | -4.031043 | 0.192363  | -1.322070 |
| C 0 | -4.324593 | -1.055500 | -0.727236 |
| O 0 | -4.949929 | 0.642600  | -2.288082 |
| C 0 | -5.790584 | 1.666529  | -1.735977 |
| C 0 | -1.952785 | 1.595573  | -1.550838 |
| S 0 | -1.886750 | 2.162491  | 0.200961  |
| C 0 | -0.112428 | 1.908705  | 0.599392  |
| C 0 | 0.814532  | 3.033402  | 0.090412  |
| C 0 | 2.260314  | 2.681628  | 0.436374  |
| O 0 | 0.498706  | 4.288111  | 0.649163  |
| O 0 | 2.890727  | 3.269469  | 1.293539  |
| O 0 | 2.733879  | 1.649488  | -0.275236 |
| O 0 | -5.452905 | -1.470285 | -0.473401 |
| O 0 | -3.669249 | -3.023478 | 1.485665  |
| O 0 | -0.878498 | -4.111577 | 1.308690  |
| C 0 | -1.178336 | -1.814644 | 2.057055  |
| C 0 | 1.090150  | -2.419579 | -0.019621 |
| C 0 | 1.958047  | -2.305691 | -1.280819 |
| C 0 | 3.458640  | -2.265203 | -0.966112 |
| C 0 | 4.339469  | -2.172693 | -2.218492 |
| C 0 | 5.837818  | -2.130737 | -1.900919 |
| H 0 | -2.837011 | -3.806395 | -0.239568 |

|     |           |           |           |
|-----|-----------|-----------|-----------|
| H 0 | -0.599896 | -3.217436 | -1.092433 |
| H 0 | -2.593408 | 0.018103  | -2.845908 |
| H 0 | -6.438402 | 1.971751  | -2.561244 |
| H 0 | -5.199565 | 2.520977  | -1.389573 |
| H 0 | -6.395361 | 1.271564  | -0.914415 |
| H 0 | -2.506499 | 2.345713  | -2.120861 |
| H 0 | -0.937592 | 1.566961  | -1.955966 |
| H 0 | 0.201892  | 0.937836  | 0.210019  |
| H 0 | -0.061934 | 1.873385  | 1.692350  |
| H 0 | 0.733056  | 3.107822  | -1.000369 |
| H 0 | 1.125503  | 4.419399  | 1.385601  |
| H 0 | 3.646968  | 1.469342  | 0.023630  |
| H 0 | -4.564073 | -2.872996 | 1.129209  |
| H 0 | -1.516382 | -4.419399 | 1.974766  |
| H 0 | -1.449535 | -0.798142 | 1.755930  |
| H 0 | -1.843976 | -2.109176 | 2.872619  |
| H 0 | -0.151298 | -1.809868 | 2.430735  |
| H 0 | 1.341732  | -3.335935 | 0.525517  |
| H 0 | 1.300129  | -1.578841 | 0.652861  |
| H 0 | 1.679135  | -1.402235 | -1.838101 |
| H 0 | 1.746623  | -3.157728 | -1.943046 |
| H 0 | 3.668275  | -1.406680 | -0.310731 |
| H 0 | 3.735804  | -3.161908 | -0.392171 |
| H 0 | 4.061230  | -1.276225 | -2.790735 |
| H 0 | 4.127453  | -3.030209 | -2.872619 |
| H 0 | 6.085180  | -1.266061 | -1.272427 |
| H 0 | 6.438402  | -2.060831 | -2.815177 |
| H 0 | 6.153835  | -3.032584 | -1.362020 |

Free Energy (PCM/B3LYP/6-31G\*) = -1757.652849  
Number of imaginary frequencies = 0

**1-3R-c30**

B3LYP/6-31G\* geometry

|     |           |           |           |
|-----|-----------|-----------|-----------|
| O 0 | -0.844393 | 0.192390  | -0.443441 |
| C 0 | 0.574820  | 2.111112  | -0.377010 |
| C 0 | -1.354882 | 2.066176  | 1.152011  |
| C 0 | -0.361556 | 2.986650  | 0.394432  |
| C 0 | -1.912675 | 1.029196  | 0.131985  |
| C 0 | 0.280020  | 0.843555  | -0.726659 |
| C 0 | 1.414618  | 0.184189  | -1.469729 |
| N 0 | 2.477010  | 1.198752  | -1.300647 |
| C 0 | 1.916859  | 2.418987  | -0.837565 |
| O 0 | 3.297756  | 1.336139  | -2.442160 |
| C 0 | 4.680621  | 1.173729  | -2.097393 |
| C 0 | 1.788915  | -1.229010 | -1.004991 |
| S 0 | 2.021358  | -1.466465 | 0.805414  |
| C 0 | 3.769002  | -0.992716 | 1.111886  |
| C 0 | 4.798538  | -2.051260 | 0.689823  |
| C 0 | 6.207901  | -1.651800 | 1.126687  |
| O 0 | 4.798715  | -2.239419 | -0.713321 |
| O 0 | 7.129508  | -1.552040 | 0.338690  |
| O 0 | 6.313235  | -1.446529 | 2.443474  |
| O 0 | 2.508083  | 3.495508  | -0.810716 |
| O 0 | 0.317728  | 3.832295  | 1.319171  |
| O 0 | -2.502276 | 2.831839  | 1.536348  |
| C 0 | -0.713293 | 1.412190  | 2.380649  |
| C 0 | -2.959894 | 0.072389  | 0.686863  |
| C 0 | -3.671290 | -0.748796 | -0.397752 |
| C 0 | -4.711079 | -1.717835 | 0.179210  |
| C 0 | -5.447362 | -2.529340 | -0.894225 |
| C 0 | -6.475292 | -3.505359 | -0.312340 |
| H 0 | -0.962249 | 3.606164  | -0.290381 |
| H 0 | -2.334813 | 1.593319  | -0.709274 |
| H 0 | 1.167364  | 0.123521  | -2.539763 |
| H 0 | 4.993274  | 1.932788  | -1.373652 |
| H 0 | 5.219244  | 1.318100  | -3.037546 |
| H 0 | 4.876307  | 0.170503  | -1.706587 |
| H 0 | 2.686440  | -1.568811 | -1.522644 |
| H 0 | 0.969457  | -1.903278 | -1.271904 |
| H 0 | 3.824861  | -0.847378 | 2.194139  |
| H 0 | 3.975461  | -0.037461 | 0.625418  |
| H 0 | 4.559170  | -2.998305 | 1.196109  |
| H 0 | 5.730405  | -2.158017 | -0.996274 |
| H 0 | 7.239770  | -1.206668 | 2.642257  |
| H 0 | 1.058726  | 4.232397  | 0.827997  |
| H 0 | -2.171037 | 3.569588  | 2.076005  |
| H 0 | 0.102838  | 0.736259  | 2.107445  |

H O -0.306854 2.185804 3.037546  
H O -1.465878 0.845305 2.934921  
H O -2.481938 -0.600041 1.409622  
H O -3.690626 0.672400 1.240154  
H O -2.929046 -1.313051 -0.977018  
H O -4.162660 -0.064432 -1.104569  
H O -4.215728 -2.407474 0.878692  
H O -5.444749 -1.154055 0.774362  
H O -4.713018 -3.085234 -1.494418  
H O -5.948941 -1.839622 -1.587921  
H O -5.996680 -4.232397 0.355447  
H O -6.986996 -4.065699 -1.103374  
H O -7.239770 -2.975071 0.269022  
Free Energy (PCM/B3LYP/6-31G\*) = -1757.652816  
Number of imaginary frequencies = 0

### 1-3R-c31

B3LYP/6-31G\* geometry  
O O -0.757349 -1.169115 -0.917961  
C O -3.041493 -1.679096 -0.439777  
C O -1.314420 -2.810745 0.900052  
C O -2.774437 -2.899938 0.383248  
C O -0.403022 -2.467815 -0.315973  
C O -2.067675 -0.940953 -1.006117  
C O -2.625667 0.235753 -1.768318  
N O -4.031092 0.192439 -1.322686  
C O -4.324754 -1.055341 -0.727816  
O O -4.949960 0.642956 -2.288550  
C O -5.790371 1.666963 -1.736228  
C O -1.952872 1.595586 -1.551175  
S O -1.886839 2.162069 0.200785  
C O -0.112491 1.908424 0.599019  
C O 0.814438 3.033188 0.090144  
C O 2.260252 2.681334 0.435880  
O O 0.498676 4.287764 0.649275  
O O 2.890793 3.269046 1.293045  
O O 2.733726 1.649336 -0.275981  
O O -5.453072 -1.470107 -0.474021  
O O -3.669472 -3.023068 1.485344  
O O -0.878799 -4.111431 1.308371  
C O -1.178559 -1.814423 2.056582  
C O 1.089972 -2.419389 -0.019915  
C O 1.957912 -2.305841 -1.281116  
C O 3.458475 -2.264720 -0.966376  
C O 4.339272 -2.172938 -2.218846  
C O 5.837605 -2.130117 -1.901350  
H O -2.837406 -3.806240 -0.239847  
H O -0.599941 -3.217618 -1.092717  
H O -2.593404 0.018155 -2.846479  
H O -6.438128 1.972545 -2.561410  
H O -5.199122 2.521174 -1.389634  
H O -6.395236 1.271964 -0.914746  
H O -2.506637 2.345836 -2.121003  
H O -0.937683 1.567118 -1.956318  
H O 0.201833 0.937557 0.209650  
H O -0.061934 1.873071 1.691981  
H O 0.732869 3.107876 -1.000615  
H O 1.125733 4.418938 1.385517  
H O 3.646868 1.469169 0.022705  
H O -4.564315 -2.872825 1.128838  
H O -1.516382 -4.418938 1.974881  
H O -1.449898 -0.797971 1.755397  
H O -1.844131 -2.108964 2.872204  
H O -0.151524 -1.809507 2.430260  
H O 1.341661 -3.335504 0.525577  
H O 1.299796 -1.578358 0.652241  
H O 1.678771 -1.402724 -1.838825  
H O 1.746766 -3.158252 -1.942947  
H O 3.667854 -1.405634 -0.311655  
H O 3.735881 -3.160910 -0.391756  
H O 4.060670 -1.277076 -2.791857  
H O 4.127575 -3.031115 -2.872204  
H O 6.084675 -1.264716 -1.273746  
H O 6.438128 -2.060919 -2.815703  
H O 6.153968 -3.031305 -1.361554  
Free Energy (PCM/B3LYP/6-31G\*) = -1757.6528  
Number of imaginary frequencies = 0

### 1-3R-c32

B3LYP/6-31G\* geometry  
O O -0.745672 -1.170394 -0.830779  
C O -2.995375 -1.929951 -0.608175  
C O -1.260865 -3.090114 0.698567  
C O -2.672471 -3.222998 0.072030  
C O -0.318261 -2.512526 -0.397912  
C O -2.062808 -1.035520 -0.991866  
C O -2.686762 0.194178 -1.614729  
N O -4.111547 -0.062907 -1.315855  
C O -4.313985 -1.399015 -0.917878  
O O -5.003211 0.447276 -2.275258  
C O -6.002722 1.261359 -1.642729  
C O -2.263793 1.567908 -1.066767  
S O -0.642512 2.186501 -1.684642  
C O 0.512691 1.795783 -0.303231  
C O 0.889488 3.017895 0.548331  
C O -0.315558 3.672275 1.214316  
O O 1.570836 3.979125 -0.227510  
O O -0.600867 4.842509 1.051761  
O O -1.005653 2.829214 1.995211  
O O -5.407182 -1.951518 -0.813001  
O O -3.620992 -3.557883 1.081850  
O O -0.740100 -4.396338 0.964538  
C O -1.272779 -2.251185 1.981471  
C O 1.148168 -2.401506 -0.002982  
C O 2.079336 -2.102597 -1.186575  
C O 3.552052 -2.001070 -0.770550  
C O 4.499202 -1.724677 -1.945167  
C O 5.968632 -1.622662 -1.523423  
H O -2.619005 -4.042331 -0.662162  
H O -0.413773 -3.155421 -1.282227  
H O -2.542120 0.176608 -2.703023  
H O -6.618799 0.661963 -0.966268  
H O -6.613985 1.642876 -2.463996  
H O -5.547480 2.094195 -1.096551  
H O -2.273269 1.576519 0.025522  
H O -3.002995 2.295514 -1.411255  
H O 1.429601 1.415774 -0.760740  
H O 0.090872 0.997058 0.308095  
H O 1.548126 2.659289 1.355521  
H O 1.048204 4.800651 -0.160012  
H O -1.751527 3.322571 2.390252  
H O -4.500609 -3.446092 0.676261  
H O -1.392577 -4.842509 1.530731  
H O -1.593799 -1.221025 1.798514  
H O -1.964529 -2.693583 2.703023  
H O -0.273506 -2.232172 2.423912  
H O 1.256733 -1.625060 0.764225  
H O 1.431892 -3.352125 0.461522  
H O 1.770541 -1.167619 -1.671873  
H O 1.968117 -2.894573 -1.941403  
H O 3.664058 -1.204935 -0.019558  
H O 3.854550 -2.934571 -0.273044  
H O 4.195406 -0.793146 -2.443500  
H O 4.388136 -2.521643 -2.694166  
H O 6.118200 -0.809865 -0.801871  
H O 6.618799 -1.428232 -2.384219  
H O 6.309922 -2.552050 -1.050637  
Free Energy (PCM/B3LYP/6-31G\*) = -1757.652773  
Number of imaginary frequencies = 0

### 1-3R-c33

B3LYP/6-31G\* geometry  
O O 1.288527 -0.730715 -1.467377  
C O 2.223101 -2.515817 -0.165808  
C O 3.755183 -1.083358 -1.461136  
C O 3.658479 -2.109447 -0.297687  
C O 2.600215 -0.044417 -1.417652  
C O 1.200907 -1.842520 -0.740575  
C O -0.135160 -2.498392 -0.470101  
N O 0.270699 -3.504799 0.528791  
C O 1.673640 -3.679438 0.530427  
C O -0.492559 -4.686219 0.483857  
O O -1.011695 -4.991202 1.785970  
C O -1.233934 -1.573862 0.078086

|     |           |           |           |
|-----|-----------|-----------|-----------|
| S 0 | -2.060889 | -0.542833 | -1.203667 |
| C 0 | -3.421186 | -1.652616 | -1.750528 |
| C 0 | -4.667148 | -1.651287 | -0.850666 |
| C 0 | -5.239021 | -0.250127 | -0.656169 |
| O 0 | -4.397943 | -2.217169 | 0.415579  |
| O 0 | -5.424175 | 0.232432  | 0.444659  |
| O 0 | -5.522349 | 0.363967  | -1.809771 |
| O 0 | 2.259090  | -4.618567 | 1.054334  |
| O 0 | 4.177126  | -1.526083 | 0.903890  |
| O 0 | 3.660075  | -1.805521 | -2.698514 |
| C 0 | 5.118577  | -0.398218 | -1.504289 |
| C 0 | 2.587637  | 0.948187  | -0.253555 |
| C 0 | 1.504811  | 2.028076  | -0.389943 |
| C 0 | 1.522540  | 3.036838  | 0.765595  |
| C 0 | 0.450703  | 4.126611  | 0.635379  |
| C 0 | 0.464650  | 5.128785  | 1.794256  |
| H 0 | 4.272066  | -2.975276 | -0.582985 |
| H 0 | 2.621265  | 0.493660  | -2.369034 |
| H 0 | -0.495504 | -3.016483 | -1.368702 |
| H 0 | -1.612523 | -5.892908 | 1.644601  |
| H 0 | -0.199283 | -5.192435 | 2.490576  |
| H 0 | -1.641719 | -4.178146 | 2.162033  |
| H 0 | -0.819391 | -0.888786 | 0.822614  |
| H 0 | -2.008007 | -2.172103 | 0.559325  |
| H 0 | -3.045428 | -2.676288 | -1.833595 |
| H 0 | -3.695728 | -1.317136 | -2.753933 |
| H 0 | -5.439104 | -2.245715 | -1.365811 |
| H 0 | -4.662758 | -1.544055 | 1.072207  |
| H 0 | -5.884742 | 1.248065  | -1.604174 |
| H 0 | 4.072354  | -2.186946 | 1.608070  |
| H 0 | 2.790251  | -2.235931 | -2.741541 |
| H 0 | 5.884742  | -1.151811 | -1.712396 |
| H 0 | 5.357811  | 0.084008  | -0.556315 |
| H 0 | 5.143652  | 0.346195  | -2.306946 |
| H 0 | 2.476573  | 0.404069  | 0.690768  |
| H 0 | 3.570886  | 1.431550  | -0.215123 |
| H 0 | 1.644348  | 2.561700  | -1.341562 |
| H 0 | 0.515856  | 1.555510  | -0.443768 |
| H 0 | 1.382570  | 2.502625  | 1.717067  |
| H 0 | 2.514462  | 3.509233  | 0.823849  |
| H 0 | -0.539438 | 3.653283  | 0.572221  |
| H 0 | 0.593793  | 4.662349  | -0.313815 |
| H 0 | 0.289760  | 4.626665  | 2.753933  |
| H 0 | -0.311664 | 5.892908  | 1.671547  |
| H 0 | 1.431385  | 5.643282  | 1.861412  |

Free Energy (PCM/B3LYP/6-31G\*) = -1757.652769  
Number of imaginary frequencies = 0

**1-3R-c34**

B3LYP/6-31G\* geometry

|     |           |           |           |
|-----|-----------|-----------|-----------|
| O 0 | 0.726315  | -0.852542 | -0.849016 |
| C 0 | 0.055004  | -3.120989 | -0.517610 |
| C 0 | 1.867883  | -2.246938 | 0.899661  |
| C 0 | 1.244482  | -3.532106 | 0.291813  |
| C 0 | 2.024311  | -1.206879 | -0.249336 |
| C 0 | -0.109009 | -1.875825 | -1.004898 |
| C 0 | -1.411346 | -1.730832 | -1.754232 |
| N 0 | -2.065035 | -3.002038 | -1.388229 |
| C 0 | -1.121226 | -3.909397 | -0.851346 |
| O 0 | -2.917167 | -3.517491 | -2.380642 |
| C 0 | -4.229486 | -3.736860 | -1.841695 |
| C 0 | -2.237948 | -0.483651 | -1.432684 |
| S 0 | -2.794205 | -0.464601 | 0.323980  |
| C 0 | -2.931214 | 1.340035  | 0.607158  |
| C 0 | -4.146963 | 2.005819  | -0.077954 |
| C 0 | -4.122430 | 3.504694  | 0.215637  |
| O 0 | -5.375279 | 1.471003  | 0.357504  |
| O 0 | -4.916181 | 4.037959  | 0.966591  |
| O 0 | -3.124670 | 4.143265  | -0.408531 |
| O 0 | -1.320178 | -5.107965 | -0.669777 |
| O 0 | 0.908259  | -4.444589 | 1.333501  |
| O 0 | 3.211623  | -2.525138 | 1.307046  |
| C 0 | 1.048479  | -1.715831 | 2.081277  |
| C 0 | 2.691438  | 0.103408  | 0.147209  |
| C 0 | 3.052269  | 0.991927  | -1.052132 |
| C 0 | 3.731611  | 2.302215  | -0.635318 |
| C 0 | 4.107678  | 3.197333  | -1.823247 |

|     |           |           |           |
|-----|-----------|-----------|-----------|
| C 0 | 4.784006  | 4.505690  | -1.401118 |
| H 0 | 2.014348  | -3.984247 | -0.353437 |
| H 0 | 2.601551  | -1.688000 | -1.049306 |
| H 0 | -1.213504 | -1.732882 | -2.835815 |
| H 0 | -4.204474 | -4.500580 | -1.058600 |
| H 0 | -4.824303 | -4.090447 | -2.687295 |
| H 0 | -4.653954 | -2.808227 | -1.446206 |
| H 0 | -3.100435 | -0.445975 | -2.103166 |
| H 0 | -1.619365 | 0.399803  | -1.618868 |
| H 0 | -2.002414 | 1.827671  | 0.296057  |
| H 0 | -3.028330 | 1.452135  | 1.691958  |
| H 0 | -4.072421 | 1.868920  | -1.162889 |
| H 0 | -5.708819 | 2.085733  | 1.038194  |
| H 0 | -3.152032 | 5.083739  | -0.143225 |
| H 0 | 0.334110  | -5.121436 | 0.930193  |
| H 0 | 3.161593  | -3.267586 | 1.932769  |
| H 0 | 0.044456  | -1.403271 | 1.777504  |
| H 0 | 0.942556  | -2.499824 | 2.835815  |
| H 0 | 1.557762  | -0.862387 | 2.536493  |
| H 0 | 2.030343  | 0.650860  | 0.830013  |
| H 0 | 3.596777  | -0.149339 | 0.709847  |
| H 0 | 2.145276  | 1.217721  | -1.627861 |
| H 0 | 3.717986  | 0.434583  | -1.727132 |
| H 0 | 3.065395  | 2.858620  | 0.040601  |
| H 0 | 4.636396  | 2.074034  | -0.052462 |
| H 0 | 3.203401  | 3.423574  | -2.405890 |
| H 0 | 4.774291  | 2.641391  | -2.497688 |
| H 0 | 4.126902  | 5.100099  | -0.754095 |
| H 0 | 5.041815  | 5.121436  | -2.270532 |
| H 0 | 5.708819  | 4.310923  | -0.843831 |

Free Energy (PCM/B3LYP/6-31G\*) = -1757.652768  
Number of imaginary frequencies = 0

**1-3R-c35**

B3LYP/6-31G\* geometry

|     |           |           |           |
|-----|-----------|-----------|-----------|
| O 0 | 1.800549  | -0.699741 | -0.593667 |
| C 0 | 2.650774  | -2.931062 | -0.538808 |
| C 0 | 3.999895  | -1.167213 | 0.521151  |
| C 0 | 4.048610  | -2.567820 | -0.145866 |
| C 0 | 3.185554  | -0.227424 | -0.417104 |
| C 0 | 1.678662  | -2.018234 | -0.726316 |
| C 0 | 0.349946  | -2.663273 | -1.047410 |
| N 0 | 0.678309  | -4.079889 | -0.792711 |
| C 0 | 2.078995  | -4.257599 | -0.707343 |
| O 0 | 0.001963  | -4.987411 | -1.633231 |
| C 0 | -0.586986 | -6.039930 | -0.853395 |
| C 0 | -0.793491 | -2.111330 | -0.190895 |
| S 0 | -2.415626 | -2.812651 | -0.704046 |
| C 0 | -3.536258 | -1.775858 | 0.310757  |
| C 0 | -3.829647 | -0.385213 | -0.294251 |
| C 0 | -4.718246 | 0.401498  | 0.667161  |
| O 0 | -4.467935 | -0.470463 | -1.547766 |
| O 0 | -5.886489 | 0.641916  | 0.430958  |
| O 0 | -4.084214 | 0.758497  | 1.791012  |
| O 0 | 2.653456  | -5.343846 | -0.721133 |
| O 0 | 4.623912  | -3.510379 | 0.754686  |
| O 0 | 5.315493  | -0.604798 | 0.528852  |
| C 0 | 3.435921  | -1.228320 | 1.945189  |
| C 0 | 3.094392  | 1.224649  | 0.032513  |
| C 0 | 2.509614  | 2.157115  | -1.038043 |
| C 0 | 2.431386  | 3.617288  | -0.575240 |
| C 0 | 1.857103  | 4.561339  | -1.639406 |
| C 0 | 1.777700  | 6.018624  | -1.173030 |
| H 0 | 4.690843  | -2.474632 | -1.035822 |
| H 0 | 3.647461  | -0.278420 | -1.411238 |
| H 0 | 0.116113  | -2.536015 | -2.113089 |
| H 0 | -1.299366 | -5.635648 | -0.127948 |
| H 0 | 0.187418  | -6.622954 | -0.347173 |
| H 0 | -1.108894 | -6.666333 | -1.580947 |
| H 0 | -0.817255 | -1.024927 | -0.318286 |
| H 0 | -0.608550 | -2.338289 | 0.863519  |
| H 0 | -3.120917 | -1.680836 | 1.318421  |
| H 0 | -4.472823 | -2.337681 | 0.381171  |
| H 0 | -2.890082 | 0.166354  | -0.416904 |
| H 0 | -5.416970 | -0.320905 | -1.375514 |
| H 0 | -4.723316 | 1.222913  | 2.366743  |
| H 0 | 4.442596  | -4.392482 | 0.381271  |

H O 5.886489 -1.245605 0.985725  
H O 2.399945 -1.580157 1.961334  
H O 4.032857 -1.918229 2.547277  
H O 3.475869 -0.238740 2.407331  
H O 2.489714 1.280823 0.945886  
H O 4.106934 1.548304 0.297173  
H O 1.507464 1.809039 -1.319837  
H O 3.126408 2.095422 -1.946385  
H O 1.815136 3.678673 0.334019  
H O 3.435458 3.962694 -0.287371  
H O 0.854895 4.213628 -1.927632  
H O 2.473894 4.500326 -2.547277  
H O 1.139863 6.115880 -0.285665  
H O 1.363342 6.666333 -1.954233  
H O 2.770517 6.405053 -0.910968  
Free Energy (PCM/B3LYP/6-31G\*) = -1757.652749  
Number of imaginary frequencies = 0

### 1-3R-c36

B3LYP/6-31G\* geometry  
O O -0.757560 -1.168003 -0.917514  
C O -3.041824 -1.677697 -0.439700  
C O -1.315033 -2.810003 0.899987  
C O -2.775053 -2.898786 0.383087  
C O -0.403546 -2.466908 -0.315945  
C O -2.067814 -0.939559 -1.005742  
C O -2.625495 0.237426 -1.767697  
N O -4.030944 0.194453 -1.321959  
C O -4.324893 -1.053448 -0.727405  
O O -4.949692 0.645212 -2.287874  
C O -5.790123 1.669129 -1.735432  
C O -1.952265 1.597041 -1.550533  
S O -1.885711 2.163435 0.201409  
C O -0.111395 1.908858 0.599369  
C O 0.815808 3.033571 0.090856  
C O 2.261592 2.680982 0.435981  
O O 0.500660 4.287995 0.650640  
O O 2.892504 3.267765 1.293503  
O O 2.734587 1.649410 -0.276829  
O O -5.453334 -1.467915 -0.473626  
O O -3.670224 -3.021971 1.485070  
O O -0.879652 -4.110880 1.307971  
C O -1.178940 -1.813983 2.056744  
C O 1.089450 -2.418989 -0.019831  
C O 1.957442 -2.305133 -1.280961  
C O 3.457982 -2.264248 -0.966076  
C O 4.338931 -2.171866 -2.218377  
C O 5.837219 -2.129390 -1.900610  
H O -2.838127 -3.804943 -0.240203  
H O -0.600660 -3.216457 -1.092895  
H O -2.593427 0.020023 -2.845895  
H O -6.394958 1.274028 -0.913978  
H O -6.437900 1.974734 -2.560590  
H O -5.198924 2.523351 -1.388777  
H O -2.505879 2.347496 -2.120241  
H O -0.937159 1.568265 -1.955870  
H O 0.202523 0.938113 0.209369  
H O -0.060693 1.872901 1.692295  
H O 0.733897 3.108858 -0.999830  
H O 1.127522 4.418357 1.387185  
H O 3.647727 1.468673 0.021518  
H O -4.564982 -2.871132 1.128595  
H O -1.517094 -4.418357 1.974627  
H O -1.449896 -0.797377 1.755754  
H O -1.844662 -2.108452 2.872264  
H O -0.151900 -1.809498 2.430424  
H O 1.299469 -1.578295 0.652694  
H O 1.340873 -3.335397 0.525286  
H O 1.678397 -1.401824 -1.838417  
H O 1.746262 -3.157328 -1.943058  
H O 3.667327 -1.405505 -0.310888  
H O 3.735273 -3.160743 -0.391871  
H O 4.060512 -1.275652 -2.790928  
H O 4.127244 -3.029645 -2.872264  
H O 6.084235 -1.264482 -1.272301  
H O 6.437900 -2.059537 -2.814807  
H O 6.153426 -3.031008 -1.361439

Free Energy (PCM/B3LYP/6-31G\*) = -1757.65274  
Number of imaginary frequencies = 0

### 1-3R-c37

B3LYP/6-31G\* geometry  
O O 1.929907 -1.224010 -0.263255  
C O 1.851114 -3.602937 -0.423354  
C O 3.913292 -2.578906 0.454066  
C O 3.313853 -3.841226 -0.223072  
C O 3.396589 -1.335122 -0.328906  
C O 1.285349 -2.381562 -0.405948  
C O -0.215054 -2.453232 -0.576693  
N O -0.355838 -3.893976 -0.907970  
C O 0.808692 -4.607138 -0.598766  
O O -1.577990 -4.503858 -0.618510  
C O -2.262297 -4.845533 -1.835928  
C O -1.016048 -2.076823 0.687103  
S O -1.106165 -0.270335 0.997705  
C O -2.502916 0.235127 -0.081603  
C O -3.879153 -0.194670 0.461800  
C O -4.969028 0.436785 -0.412346  
O O -4.098913 0.235159 1.796492  
O O -5.157190 0.110386 -1.564344  
O O -5.673408 1.406437 0.185355  
O O 0.910960 -5.831484 -0.522983  
O O 3.565759 -4.995980 0.575060  
O O 5.329993 -2.563064 0.249363  
C O 3.590839 -2.519572 1.951159  
C O 3.953640 0.004475 0.134346  
C O 3.607028 1.166099 -0.807894  
C O 4.171107 2.508749 -0.326535  
C O 3.842756 3.677663 -1.264216  
C O 4.401637 5.017958 -0.775228  
H O 3.823851 -3.953271 -1.193269  
H O 3.638890 -1.490170 -1.388495  
H O -0.543619 -1.841752 -1.424502  
H O -3.202737 -5.296345 -1.511362  
H O -1.679989 -5.567921 -2.415777  
H O -2.463756 -3.954125 -2.438993  
H O -0.553593 -2.518705 1.573905  
H O -2.023955 -2.486932 0.603627  
H O -2.368060 -0.142914 -1.097757  
H O -2.440849 1.327413 -0.113826  
H O -3.990666 -1.283598 0.378705  
H O -3.251944 0.164406 2.276989  
H O -5.340667 1.469405 1.109140  
H O 2.925731 -5.673082 0.282260  
H O 5.673408 -3.392109 0.623263  
H O 4.089997 -1.661065 2.407691  
H O 2.515701 -2.437594 2.137123  
H O 3.945747 -3.431051 2.438993  
H O 3.579288 0.219084 1.142715  
H O 5.041026 -0.102846 0.211481  
H O 2.516677 1.242890 -0.908378  
H O 3.997059 0.945512 -1.812195  
H O 3.778916 2.728535 0.677474  
H O 5.262809 2.427523 -0.216877  
H O 2.752043 3.754895 -1.377127  
H O 4.238611 3.459531 -2.266241  
H O 3.996165 5.279781 0.209977  
H O 4.151370 5.831484 -1.465928  
H O 5.494419 4.981535 -0.684403  
Free Energy (PCM/B3LYP/6-31G\*) = -1757.652698  
Number of imaginary frequencies = 0

### 1-3R-c38

B3LYP/6-31G\* geometry  
O O -1.290649 -0.503718 0.010951  
C O -3.609974 -0.861394 -0.427166  
C O -2.259233 -2.800835 0.262529  
C O -3.551210 -2.354415 -0.471778  
C O -1.084251 -1.937897 -0.287230  
C O -2.550008 -0.076263 -0.170900  
C O -2.920291 1.388466 -0.151100  
N O -4.304876 1.292694 -0.684540  
C O -4.787365 -0.018457 -0.619783  
O O -5.192070 2.317935 -0.350202

|     |           |           |           |
|-----|-----------|-----------|-----------|
| C 0 | -5.513548 | 3.093449  | -1.517262 |
| C 0 | -2.919050 | 2.051557  | 1.243756  |
| S 0 | -1.318110 | 2.134917  | 2.132443  |
| C 0 | -0.339912 | 3.347156  | 1.152370  |
| C 0 | 0.746490  | 2.674396  | 0.304486  |
| C 0 | 1.636943  | 3.729007  | -0.370864 |
| O 0 | 0.218272  | 1.849809  | -0.728761 |
| O 0 | 2.089769  | 4.686582  | 0.218817  |
| O 0 | 1.897774  | 3.497961  | -1.664084 |
| O 0 | -5.960161 | -0.370328 | -0.739430 |
| O 0 | -4.693039 | -2.955245 | 0.134050  |
| O 0 | -1.930319 | -4.135139 | -0.135784 |
| C 0 | -2.399700 | -2.718725 | 1.786226  |
| C 0 | 0.293058  | -2.309992 | 0.247061  |
| C 0 | 1.459432  | -1.735181 | -0.570029 |
| C 0 | 2.827495  | -2.155056 | -0.017642 |
| C 0 | 4.006840  | -1.606129 | -0.830478 |
| C 0 | 5.369922  | -2.032560 | -0.275859 |
| H 0 | -3.463892 | -2.705478 | -1.512410 |
| H 0 | -1.098184 | -2.019045 | -1.381280 |
| H 0 | -2.286442 | 1.958207  | -0.837496 |
| H 0 | -6.190951 | 3.871518  | -1.158559 |
| H 0 | -6.016227 | 2.473799  | -2.265955 |
| H 0 | -4.615925 | 3.549161  | -1.948130 |
| H 0 | -3.570487 | 1.483081  | 1.914734  |
| H 0 | -3.334216 | 3.057147  | 1.152750  |
| H 0 | 0.135560  | 4.030344  | 1.859332  |
| H 0 | -1.018151 | 3.929018  | 0.521317  |
| H 0 | 1.404435  | 2.091331  | 0.963049  |
| H 0 | -0.055341 | 0.986190  | -0.362797 |
| H 0 | 1.412735  | 2.678535  | -1.908983 |
| H 0 | -5.464162 | -2.437000 | -0.166095 |
| H 0 | -2.701970 | -4.686582 | 0.077805  |
| H 0 | -2.578810 | -1.695323 | 2.129142  |
| H 0 | -3.245038 | -3.332034 | 2.108651  |
| H 0 | -1.492266 | -3.094321 | 2.265955  |
| H 0 | 0.369316  | -1.986423 | 1.292291  |
| H 0 | 0.353372  | -3.403513 | 0.244924  |
| H 0 | 1.404340  | -0.638952 | -0.596742 |
| H 0 | 1.368161  | -2.071761 | -1.612686 |
| H 0 | 2.917878  | -1.818276 | 1.025650  |
| H 0 | 2.884890  | -3.253235 | 0.009646  |
| H 0 | 3.948876  | -0.508675 | -0.856417 |
| H 0 | 3.914487  | -1.941628 | -1.873173 |
| H 0 | 5.505529  | -1.681563 | 0.754728  |
| H 0 | 6.190951  | -1.625780 | -0.877374 |
| H 0 | 5.470187  | -3.125040 | -0.269354 |

Free Energy (PCM/B3LYP/6-31G\*) = -1757.652691  
Number of imaginary frequencies = 0

**1-3R-c39**

B3LYP/6-31G\* geometry

|     |           |           |           |
|-----|-----------|-----------|-----------|
| O 0 | 1.083747  | -0.046731 | -0.444680 |
| C 0 | 2.837258  | -1.647438 | -0.680870 |
| C 0 | 3.439056  | 0.593086  | 0.140471  |
| C 0 | 3.968559  | -0.673109 | -0.581787 |
| C 0 | 2.106851  | 1.008514  | -0.551933 |
| C 0 | 1.541107  | -1.285793 | -0.606911 |
| C 0 | 0.618188  | -2.480767 | -0.679470 |
| N 0 | 1.604529  | -3.573997 | -0.564971 |
| C 0 | 2.914251  | -3.095812 | -0.786165 |
| O 0 | 1.246064  | -4.745877 | -1.254148 |
| C 0 | 1.301612  | -5.876899 | -0.371425 |
| C 0 | -0.454728 | -2.596900 | 0.412304  |
| S 0 | -1.825694 | -1.395140 | 0.151577  |
| C 0 | -3.111869 | -2.182988 | 1.210583  |
| C 0 | -4.510325 | -1.781565 | 0.733765  |
| C 0 | -4.832559 | -2.302638 | -0.665814 |
| O 0 | -4.653408 | -0.376608 | 0.746412  |
| O 0 | -5.240046 | -1.577558 | -1.553088 |
| O 0 | -4.659514 | -3.623099 | -0.787855 |
| O 0 | 3.903647  | -3.801674 | -0.968807 |
| O 0 | 5.083017  | -1.204513 | 0.130372  |
| O 0 | 4.326402  | 1.686088  | -0.116303 |
| C 0 | 3.285302  | 0.374170  | 1.649755  |
| C 0 | 1.469307  | 2.286380  | -0.022772 |
| C 0 | 0.322347  | 2.805873  | -0.901282 |

|     |           |           |           |
|-----|-----------|-----------|-----------|
| C 0 | -0.304880 | 4.095040  | -0.356333 |
| C 0 | -1.438090 | 4.638908  | -1.235790 |
| C 0 | -2.066335 | 5.922869  | -0.684219 |
| H 0 | 4.295258  | -0.354669 | -1.584336 |
| H 0 | 2.314812  | 1.115325  | -1.624179 |
| H 0 | 0.142926  | -2.530322 | -1.668617 |
| H 0 | 2.324367  | -6.045669 | -0.022057 |
| H 0 | 0.971241  | -6.722848 | -0.978851 |
| H 0 | 0.630032  | -5.744700 | 0.483422  |
| H 0 | -0.004573 | -2.460052 | 1.399690  |
| H 0 | -0.872436 | -3.605940 | 0.355936  |
| H 0 | -2.984265 | -1.862441 | 2.247918  |
| H 0 | -3.004702 | -3.269715 | 1.163617  |
| H 0 | -5.237323 | -2.248032 | 1.419045  |
| H 0 | -5.050616 | -0.140189 | -0.113995 |
| H 0 | -4.903844 | -3.878818 | -1.698906 |
| H 0 | 5.240046  | -2.095538 | -0.233235 |
| H 0 | 5.207812  | 1.400686  | 0.178650  |
| H 0 | 2.550736  | -0.403662 | 1.879732  |
| H 0 | 4.243668  | 0.066374  | 2.075996  |
| H 0 | 2.971760  | 1.303508  | 2.131965  |
| H 0 | 1.106597  | 2.110037  | 0.997143  |
| H 0 | 2.260301  | 3.041503  | 0.042919  |
| H 0 | -0.451947 | 2.032860  | -0.989648 |
| H 0 | 0.700029  | 2.985897  | -1.918338 |
| H 0 | -0.689655 | 3.911893  | 0.657853  |
| H 0 | 0.475099  | 4.864132  | -0.252822 |
| H 0 | -2.214499 | 3.868086  | -1.342919 |
| H 0 | -1.051954 | 4.825744  | -2.247918 |
| H 0 | -2.492664 | 5.758050  | 0.313167  |
| H 0 | -2.870520 | 6.285927  | -1.334652 |
| H 0 | -1.320519 | 6.722848  | -0.597352 |

Free Energy (PCM/B3LYP/6-31G\*) = -1757.652662  
Number of imaginary frequencies = 0

**1-3R-c40**

B3LYP/6-31G\* geometry

|     |           |           |           |
|-----|-----------|-----------|-----------|
| O 0 | 2.064271  | -1.150059 | -0.551449 |
| C 0 | 1.843583  | -3.520832 | -0.746011 |
| C 0 | 3.929620  | -2.643148 | 0.219630  |
| C 0 | 3.289256  | -3.841539 | -0.529922 |
| C 0 | 3.526149  | -1.341684 | -0.535287 |
| C 0 | 1.361725  | -2.263486 | -0.744495 |
| C 0 | -0.138892 | -2.232915 | -0.924598 |
| N 0 | -0.447548 | -3.670722 | -0.802490 |
| C 0 | 0.732304  | -4.442973 | -0.921001 |
| O 0 | -1.532267 | -4.093139 | -1.597742 |
| C 0 | -2.446024 | -4.877842 | -0.814462 |
| C 0 | -0.835109 | -1.345425 | 0.110837  |
| S 0 | -2.642355 | -1.227031 | -0.222048 |
| C 0 | -3.097424 | 0.138675  | 0.936224  |
| C 0 | -4.052368 | 1.127052  | 0.260457  |
| C 0 | -5.448960 | 0.516903  | 0.023143  |
| O 0 | -3.540524 | 1.676695  | -0.949763 |
| O 0 | -6.036511 | -0.149715 | 0.848124  |
| O 0 | -5.980250 | 0.822524  | -1.167202 |
| O 0 | 0.763450  | -5.659958 | -1.084383 |
| O 0 | 3.476962  | -5.035288 | 0.225033  |
| O 0 | 5.351767  | -2.707804 | 0.078022  |
| C 0 | 3.541065  | -2.618507 | 1.702423  |
| C 0 | 4.125645  | -0.056391 | 0.019409  |
| C 0 | 3.923656  | 1.157563  | -0.898639 |
| C 0 | 4.532516  | 2.442377  | -0.323160 |
| C 0 | 4.358199  | 3.661261  | -1.238207 |
| C 0 | 4.959729  | 4.943731  | -0.654075 |
| H 0 | 3.814443  | -3.932803 | -1.493666 |
| H 0 | 3.822818  | -1.465965 | -1.584522 |
| H 0 | -0.391027 | -1.895932 | -1.939230 |
| H 0 | -3.260198 | -5.122999 | -1.500734 |
| H 0 | -2.830825 | -4.300451 | 0.031654  |
| H 0 | -1.963567 | -5.794959 | -0.465373 |
| H 0 | -0.405724 | -0.341287 | 0.055905  |
| H 0 | -0.672878 | -1.750397 | 1.113299  |
| H 0 | -2.182604 | 0.662000  | 1.224203  |
| H 0 | -3.571917 | -0.269633 | 1.830142  |
| H 0 | -4.201584 | 1.969684  | 0.946576  |
| H 0 | -3.029484 | 0.964862  | -1.386809 |



H O -5.297989 1.351718 -1.641162  
H O 2.897946 -5.708737 -0.176622  
H O 5.621999 -3.578587 0.415834  
H O 4.067472 -1.808123 2.212869  
H O 2.464887 -2.478707 1.842495  
H O 3.819982 -3.565714 2.171212  
H O 3.690470 0.145887 1.005692  
H O 5.195664 -0.235493 0.171039  
H O 2.851148 1.309436 -1.076479  
H O 4.374640 0.947614 -1.879366  
H O 4.075505 2.655007 0.654655  
H O 5.603983 2.283070 -0.131155  
H O 3.287716 3.815404 -1.435162  
H O 4.820658 3.450534 -2.212869  
H O 4.491475 5.199069 0.304656  
H O 4.820595 5.794959 -1.330492  
H O 6.036511 4.830698 -0.476847  
Free Energy (PCM/B3LYP/6-31G\*) = -1757.652641  
Number of imaginary frequencies = 0

### 1-3R-c41

B3LYP/6-31G\* geometry  
O O 1.706462 -1.047605 -0.862040  
C O 1.386307 -3.401211 -0.610291  
C O 3.210034 -2.353064 0.666030  
C O 2.703610 -3.680540 0.042094  
C O 3.099773 -1.245481 -0.423852  
C O 1.003781 -2.169562 -0.998244  
C O -0.393590 -2.165405 -1.573876  
N O -0.815943 -3.542068 -1.245029  
C O 0.299519 -4.329725 -0.876951  
O O -1.678631 -4.122260 -2.197284  
C O -2.818136 -4.703568 -1.544466  
C O -1.278751 -1.071759 -0.970484  
S O -2.911430 -1.008878 -1.820286  
C O -3.593839 0.562191 -1.168572  
C O -4.242728 0.454919 0.214533  
C O -4.989244 1.765003 0.536700  
O O -3.248895 0.220488 1.219024  
O O -5.884038 2.201965 -0.155414  
O O -4.559251 2.388946 1.639509  
O O 0.291324 -5.553418 -0.763780  
O O 2.611053 -4.682620 1.051209  
O O 4.614198 -2.460000 0.919827  
C O 2.460411 -2.000992 1.955898  
C O 3.623894 0.123953 -0.013163  
C O 3.733085 1.113538 -1.182018  
C O 4.254020 2.488475 -0.745516  
C O 4.376646 3.488710 -1.902179  
C O 4.889593 4.862889 -1.459371  
H O 3.450764 -3.986132 -0.707285  
H O 3.643735 -1.600824 -1.308164  
H O -0.349938 -2.056295 -2.666263  
H O -3.372311 -3.947215 -0.980310  
H O -2.509535 -5.522482 -0.888670  
H O -3.436886 -5.091075 -2.357563  
H O -0.782820 -0.106320 -1.110100  
H O -1.417376 -1.244152 0.098055  
H O -4.356663 0.875704 -1.885788  
H O -2.806638 1.323447 -1.158493  
H O -4.985621 -0.348845 0.204989  
H O -3.537942 -0.513703 1.783684  
H O -3.830509 1.829625 1.996997  
H O 2.103227 -5.417747 0.661214  
H O 4.733016 -3.242177 1.485039  
H O 2.891879 -1.103400 2.406023  
H O 1.395126 -1.824826 1.777912  
H O 2.548854 -2.825786 2.667673  
H O 2.971168 0.538753 0.764562  
H O 4.608940 -0.027687 0.441668  
H O 2.750640 1.229570 -1.657626  
H O 4.402018 0.696036 -1.948496  
H O 3.584431 2.903632 0.022313  
H O 5.235293 2.369449 -0.262539  
H O 3.396390 3.602661 -2.386632  
H O 5.049005 3.076002 -2.667673  
H O 4.218926 5.315633 -0.718495

H O 4.964628 5.553418 -2.307326  
H O 5.884038 4.786084 -1.002451  
Free Energy (PCM/B3LYP/6-31G\*) = -1757.65257  
Number of imaginary frequencies = 0

### 1-3R-c42

B3LYP/6-31G\* geometry  
O O 1.242223 -0.565173 -0.210935  
C O 0.158805 -2.659073 -0.591704  
C O 2.555096 -2.695623 -0.031320  
C O 1.408756 -3.469981 -0.733848  
C O 2.517224 -1.225704 -0.545610  
C O 0.164995 -1.332482 -0.354545  
C O -1.229286 -0.776128 -0.183906  
N O -2.010743 -2.031756 -0.159905  
C O -1.218562 -3.117593 -0.617243  
O O -3.283447 -1.942920 -0.774106  
C O -4.291200 -2.529269 0.071577  
C O -1.367188 0.075499 1.084792  
S O -3.032730 0.761295 1.437454  
C O -3.221116 2.087284 0.168753  
C O -4.121297 1.710676 -1.022181  
C O -5.554592 1.460663 -0.536345  
O O -3.604836 0.688676 -1.840354  
O O -6.136817 2.195712 0.235264  
O O -6.103829 0.351650 -1.062895  
O O -1.656656 -4.225343 -0.914504  
O O 1.287126 -4.768569 -0.159971  
C O 3.811766 -3.200654 -0.492341  
C O 2.467373 -2.795959 1.495935  
C O 3.625019 -0.323543 -0.018903  
C O 3.693537 1.037538 -0.726181  
C O 4.819882 1.927701 -0.186413  
C O 4.903512 3.292323 -0.882265  
C O 6.029338 4.177967 -0.338434  
H O 1.690648 -3.564670 -1.794243  
H O 2.556971 -1.260124 -1.641677  
H O -1.512860 -0.186699 -1.064251  
H O -4.104785 -3.599442 0.185004  
H O -5.230094 -2.360414 -0.459395  
H O -4.313194 -2.032069 1.044692  
H O -0.647025 0.897979 1.043156  
H O -1.130426 -0.534746 1.961523  
H O -2.230892 2.368203 -0.198947  
H O -3.653641 2.949248 0.681671  
H O -4.182118 2.603495 -1.659615  
H O -3.677684 -0.172968 -1.379473  
H O -7.007415 0.275897 -0.697877  
H O 0.455842 -5.144196 -0.502784  
H O 3.803238 -4.157633 -0.320287  
H O 1.560052 -2.326110 1.887718  
H O 2.457403 -3.847124 1.795371  
H O 3.334798 -2.311684 1.951369  
H O 3.485728 -0.174838 1.058774  
H O 4.570940 -0.860635 -0.149328  
H O 2.732720 1.556628 -0.615795  
H O 3.838755 0.878294 -1.804546  
H O 4.676945 2.080586 0.893642  
H O 5.781575 1.404819 -0.296019  
H O 3.941819 3.813327 -0.772140  
H O 5.046187 3.139931 -1.961523  
H O 5.894810 4.376392 0.732198  
H O 6.062709 5.144196 -0.854948  
H O 7.007415 3.697511 -0.465621  
Free Energy (PCM/B3LYP/6-31G\*) = -1757.652562  
Number of imaginary frequencies = 0

### 1-3S-c1

B3LYP/6-31G\* geometry  
O O -1.049943 -0.626611 -0.619236  
C O -1.436958 1.540175 0.331852  
C O -0.709530 -0.287949 1.823904  
C O -0.881986 1.252515 1.688314  
C O -0.173175 -0.941140 0.525824  
C O -1.484827 0.631062 -0.661738  
C O -2.138693 1.180615 -1.904497  
N O -2.624757 2.476224 -1.397685

|     |           |           |           |
|-----|-----------|-----------|-----------|
| C 0 | -2.007654 | 2.790934  | -0.164126 |
| O 0 | -2.625014 | 3.499842  | -2.362633 |
| C 0 | -3.923785 | 4.104195  | -2.442560 |
| C 0 | -3.236001 | 0.311599  | -2.526045 |
| S 0 | -4.656800 | 0.023547  | -1.383092 |
| C 0 | -4.850966 | -1.798048 | -1.503354 |
| C 0 | -3.815947 | -2.593946 | -0.697776 |
| C 0 | -3.974606 | -4.099391 | -0.981372 |
| O 0 | -3.969945 | -2.389850 | 0.700834  |
| O 0 | -4.005262 | -4.570894 | -2.099458 |
| O 0 | -4.065992 | -4.850673 | 0.121936  |
| O 0 | -1.994252 | 3.902891  | 0.349553  |
| O 0 | 0.373461  | 1.899062  | 1.920684  |
| O 0 | -2.029952 | -0.855637 | 1.969895  |
| C 0 | 0.138982  | -0.665671 | 3.038140  |
| C 0 | 1.271449  | -0.606253 | 0.148268  |
| C 0 | 1.756320  | -1.338982 | -1.110871 |
| C 0 | 3.217946  | -1.019982 | -1.449324 |
| C 0 | 3.720647  | -1.736483 | -2.709231 |
| C 0 | 5.178713  | -1.409215 | -3.047537 |
| H 0 | -1.599685 | 1.569703  | 2.461037  |
| H 0 | -0.292919 | -2.022372 | 0.632181  |
| H 0 | -1.373696 | 1.364883  | -2.672770 |
| H 0 | -4.688579 | 3.365461  | -2.705396 |
| H 0 | -3.838014 | 4.850673  | -3.235901 |
| H 0 | -4.183975 | 4.592399  | -1.498618 |
| H 0 | -2.808497 | -0.652385 | -2.815816 |
| H 0 | -3.601469 | 0.798882  | -3.433438 |
| H 0 | -4.832969 | -2.107944 | -2.550814 |
| H 0 | -5.849843 | -2.003221 | -1.105834 |
| H 0 | -2.804982 | -2.320179 | -1.021341 |
| H 0 | -3.226511 | -1.847821 | 1.044474  |
| H 0 | -4.023991 | -4.207305 | 0.871569  |
| H 0 | 0.235696  | 2.843056  | 1.733209  |
| H 0 | -2.406708 | -0.558708 | 2.814715  |
| H 0 | -0.356771 | -0.315401 | 3.951110  |
| H 0 | 1.126710  | -0.204030 | 3.002052  |
| H 0 | 0.247327  | -1.752970 | 3.101776  |
| H 0 | 1.376608  | 0.477324  | 0.027635  |
| H 0 | 1.910368  | -0.886130 | 0.993850  |
| H 0 | 1.642078  | -2.423509 | -0.968152 |
| H 0 | 1.118230  | -1.070161 | -1.961871 |
| H 0 | 3.330847  | 0.066349  | -1.581094 |
| H 0 | 3.858760  | -1.292210 | -0.597554 |
| H 0 | 3.077986  | -1.466350 | -3.559166 |
| H 0 | 3.610465  | -2.822117 | -2.576311 |
| H 0 | 5.313234  | -0.334135 | -3.220078 |
| H 0 | 5.506910  | -1.935782 | -3.951110 |
| H 0 | 5.849843  | -1.699640 | -2.229665 |

Free Energy (PCM/B3LYP/6-31G\*) = -1757.657679  
Number of imaginary frequencies = 0

### 1-3S-c2

B3LYP/6-31G\* geometry

|     |          |           |           |
|-----|----------|-----------|-----------|
| O 0 | 1.178640 | -0.378593 | -0.899897 |
| C 0 | 2.067533 | -2.394292 | 0.065506  |
| C 0 | 1.090149 | -0.722298 | 1.558077  |
| C 0 | 1.458421 | -2.225759 | 1.425137  |
| C 0 | 0.341790 | -0.193885 | 0.304420  |
| C 0 | 1.905830 | -1.489775 | -0.926780 |
| C 0 | 2.797126 | -1.773573 | -2.108133 |
| N 0 | 3.589145 | -2.896883 | -1.581245 |
| C 0 | 3.019391 | -3.410324 | -0.394032 |
| O 0 | 3.968561 | -3.841967 | -2.549121 |
| C 0 | 5.391544 | -4.030812 | -2.528342 |
| C 0 | 3.645164 | -0.569198 | -2.536053 |
| S 0 | 4.719308 | 0.051690  | -1.162794 |
| C 0 | 4.513905 | 1.870170  | -1.346997 |
| C 0 | 3.260814 | 2.439719  | -0.667662 |
| C 0 | 3.051589 | 3.905605  | -1.092156 |
| O 0 | 3.364302 | 2.407961  | 0.750590  |
| O 0 | 3.058184 | 4.273184  | -2.248579 |
| O 0 | 2.844293 | 4.743128  | -0.070171 |
| O 0 | 3.319383 | -4.478733 | 0.119930  |
| O 0 | 0.292485 | -3.019436 | 1.646630  |
| O 0 | 2.338725 | 0.007447  | 1.662684  |
| C 0 | 0.319012 | -0.423071 | 2.838922  |

|     |           |           |           |
|-----|-----------|-----------|-----------|
| C 0 | -1.052875 | -0.755226 | 0.021215  |
| C 0 | -1.744805 | -0.079958 | -1.171693 |
| C 0 | -3.159933 | -0.620740 | -1.413443 |
| C 0 | -3.866928 | 0.036976  | -2.605446 |
| C 0 | -5.279577 | -0.507090 | -2.842254 |
| H 0 | 2.209469  | -2.448082 | 2.196937  |
| H 0 | 0.289078  | 0.894615  | 0.396012  |
| H 0 | 2.212163  | -2.116161 | -2.972503 |
| H 0 | 5.712939  | -4.450202 | -1.570436 |
| H 0 | 5.918313  | -3.090425 | -2.722136 |
| H 0 | 5.591353  | -4.743128 | -3.332335 |
| H 0 | 2.979563  | 0.236484  | -2.856886 |
| H 0 | 4.273667  | -0.850696 | -3.384217 |
| H 0 | 4.521431  | 2.129897  | -2.407817 |
| H 0 | 5.401083  | 2.310769  | -0.882484 |
| H 0 | 2.374411  | 1.890366  | -1.007802 |
| H 0 | 2.827740  | 1.666676  | 1.110877  |
| H 0 | 2.906082  | 4.183480  | 0.741439  |
| H 0 | 0.545413  | -3.944479 | 1.491773  |
| H 0 | 3.000223  | -0.401776 | 1.070656  |
| H 0 | 0.945148  | -0.678816 | 3.698859  |
| H 0 | -0.600540 | -1.007084 | 2.893526  |
| H 0 | 0.071474  | 0.641996  | 2.897243  |
| H 0 | -0.987181 | -1.837047 | -0.131621 |
| H 0 | -1.661664 | -0.607240 | 0.921030  |
| H 0 | -1.793293 | 1.005072  | -0.998379 |
| H 0 | -1.140871 | -0.222546 | -2.076610 |
| H 0 | -3.110868 | -1.707593 | -1.576440 |
| H 0 | -3.765836 | -0.475193 | -0.506864 |
| H 0 | -3.261023 | -0.109843 | -3.510803 |
| H 0 | -3.915096 | 1.123115  | -2.443154 |
| H 0 | -5.260040 | -1.585801 | -3.041528 |
| H 0 | -5.758037 | -0.018411 | -3.698859 |
| H 0 | -5.918313 | -0.344111 | -1.965278 |

Free Energy (PCM/B3LYP/6-31G\*) = -1757.656761  
Number of imaginary frequencies = 0

### 1-3S-c3

B3LYP/6-31G\* geometry

|     |           |           |           |
|-----|-----------|-----------|-----------|
| O 0 | -0.494947 | -0.690280 | -0.171493 |
| C 0 | -0.778462 | 1.515191  | 0.726961  |
| C 0 | -0.112200 | -0.301218 | 2.258190  |
| C 0 | -0.210542 | 1.241057  | 2.080928  |
| C 0 | 0.378505  | -1.014609 | 0.973657  |
| C 0 | -0.880466 | 0.582165  | -0.240308 |
| C 0 | -1.540534 | 1.122584  | -1.484060 |
| N 0 | -1.972798 | 2.445777  | -1.000733 |
| C 0 | -1.318867 | 2.771203  | 0.210845  |
| O 0 | -1.961364 | 3.444137  | -1.991761 |
| C 0 | -3.242334 | 4.086611  | -2.061069 |
| C 0 | -2.678773 | 0.276754  | -2.062290 |
| S 0 | -4.079949 | 0.051136  | -0.881363 |
| C 0 | -4.329635 | -1.765832 | -0.964107 |
| C 0 | -3.308569 | -2.576310 | -0.155494 |
| C 0 | -3.513967 | -4.081510 | -0.407296 |
| O 0 | -3.438799 | -2.341623 | 1.240651  |
| O 0 | -3.574983 | -4.573169 | -1.515391 |
| O 0 | -3.609153 | -4.809214 | 0.711487  |
| O 0 | -1.260002 | 3.894601  | 0.695492  |
| O 0 | 1.079909  | 1.829484  | 2.271676  |
| O 0 | -1.458128 | -0.797193 | 2.430817  |
| C 0 | 0.728189  | -0.687456 | 3.475254  |
| C 0 | 1.832708  | -0.760337 | 0.571150  |
| C 0 | 2.268935  | -1.565477 | -0.661400 |
| C 0 | 3.738680  | -1.315797 | -1.027590 |
| C 0 | 4.244928  | -2.138810 | -2.223948 |
| C 0 | 3.581594  | -1.789325 | -3.561868 |
| H 0 | -0.896171 | 1.615514  | 2.856972  |
| H 0 | 0.208968  | -2.085613 | 1.111694  |
| H 0 | -0.786010 | 1.262049  | -2.271950 |
| H 0 | -4.034866 | 3.365513  | -2.288296 |
| H 0 | -3.150719 | 4.809214  | -2.875583 |
| H 0 | -3.467072 | 4.607037  | -1.125273 |
| H 0 | -2.287758 | -0.704584 | -2.345181 |
| H 0 | -3.051519 | 0.759519  | -2.969195 |
| H 0 | -4.333223 | -2.094891 | -2.005831 |
| H 0 | -5.329084 | -1.934381 | -0.551196 |

H O -2.294358 -2.338230 -0.496461  
H O -2.682731 -1.803307 1.562062  
H O -3.537850 -4.153738 1.448165  
H O 0.985987 2.773999 2.061690  
H O -1.813709 -0.454967 3.267736  
H O 0.257173 -0.290027 4.381936  
H O 1.736391 -0.274536 3.420191  
H O 0.785412 -1.776625 3.567232  
H O 1.983696 0.311661 0.404754  
H O 2.468177 -1.033024 1.421621  
H O 2.119519 -2.637862 -0.466570  
H O 1.621676 -1.311032 -1.508046  
H O 3.882408 -0.245703 -1.239257  
H O 4.365413 -1.540917 -0.152961  
H O 4.102061 -3.208236 -2.012483  
H O 5.329084 -1.989088 -2.315276  
H O 2.506585 -2.001673 -3.554050  
H O 4.024172 -2.366516 -4.381936  
H O 3.708198 -0.724897 -3.797178  
Free Energy (PCM/B3LYP/6-31G\*) = -1757.656596  
Number of imaginary frequencies = 0

### 1-3S-c4

B3LYP/6-31G\* geometry  
O O 0.503900 -0.644862 -0.150492  
C O -0.424008 -2.831488 -0.380129  
C O 1.812691 -2.631281 0.633373  
C O 0.837714 -3.588558 -0.107722  
C O 1.834464 -1.280993 -0.144359  
C O -0.505802 -1.486868 -0.345172  
C O -1.915132 -0.994021 -0.582406  
N O -2.584421 -2.269207 -0.928108  
C O -1.758913 -3.365768 -0.575536  
O O -3.919448 -2.381550 -0.467338  
C O -4.776554 -2.837328 -1.532313  
C O -1.983953 0.079212 -1.676433  
S O -3.651311 0.707094 -2.116636  
C O -4.139613 1.712086 -0.653373  
C O -5.105948 0.995184 0.298943  
C O -5.666679 1.986409 1.333803  
O O -4.501465 -0.067105 1.025941  
O O -6.097381 3.080970 1.038658  
O O -5.663968 1.534408 2.593953  
O O -2.140560 -4.529787 -0.473536  
O O 0.606962 -4.757009 0.675464  
O O 3.147259 -3.132140 0.509248  
C O 1.441597 -2.461221 2.110684  
C O 2.810354 -0.239559 0.386081  
C O 2.968885 0.978505 -0.535235  
C O 3.948854 2.017450 0.023809  
C O 4.125749 3.239797 -0.886166  
C O 5.099568 4.277679 -0.318837  
H O 1.329598 -3.874077 -1.051176  
H O 2.062936 -1.506413 -1.193958  
H O -2.338081 -0.605088 0.350943  
H O -5.774802 -2.873945 -1.090460  
H O -4.471142 -3.835779 -1.852604  
H O -4.754476 -2.133303 -2.367691  
H O -1.591341 -0.326938 -2.613563  
H O -1.351177 0.922764 -1.384926  
H O -4.633072 2.605922 -1.041821  
H O -3.238964 2.028238 -0.117986  
H O -5.968527 0.629993 -0.274652  
H O -4.501881 -0.891186 0.493512  
H O -5.256891 0.638360 2.564741  
H O -0.236500 -5.137139 0.363537  
H O 3.145182 -4.025586 0.892372  
H O 1.418590 -3.439493 2.597512  
H O 0.457039 -2.000973 2.237736  
H O 2.185162 -1.837812 2.613563  
H O 2.480204 0.087648 1.379525  
H O 3.777466 -0.736901 0.517440  
H O 3.316138 0.643167 -1.523281  
H O 1.989768 1.448870 -0.693599  
H O 3.600304 2.349877 1.012913  
H O 4.927823 1.543362 0.188861  
H O 3.146294 3.709872 -1.054008

H O 4.478062 2.908029 -1.873199  
H O 5.203850 5.137139 -0.991107  
H O 6.097381 3.845818 -0.172029  
H O 4.755395 4.653623 0.652699  
Free Energy (PCM/B3LYP/6-31G\*) = -1757.655574  
Number of imaginary frequencies = 0

### 1-3S-c5

B3LYP/6-31G\* geometry  
O O 1.255879 -0.794084 -0.023321  
C O -0.144004 -2.543717 -0.858192  
C O 2.282068 -2.738990 -1.227890  
C O 0.884112 -3.177074 -1.742054  
C O 2.252919 -1.193564 -1.030874  
C O 0.104807 -1.461252 -0.098118  
C O -1.090077 -1.065826 0.735775  
N O -1.946686 -2.241329 0.495001  
C O -1.497971 -3.018498 -0.580009  
O O -3.317606 -2.136046 0.711396  
C O -3.706609 -2.880639 1.885458  
C O -1.704785 0.290912 0.346925  
S O -2.104231 0.414451 -1.452185  
C O -3.638823 1.424034 -1.426167  
C O -4.906063 0.608226 -1.153756  
C O -6.160501 1.475924 -1.347147  
O O -4.956683 0.089437 0.170071  
O O -6.321751 2.208209 -2.300285  
O O -7.081367 1.339826 -0.384628  
O O -2.106942 -3.950024 -1.100543  
O O 0.795474 -4.599415 -1.748609  
O O 3.248103 -2.946664 -2.262697  
C O 2.689728 -3.494401 0.042497  
C O 3.574630 -0.568092 -0.605285  
C O 3.570574 0.966131 -0.663156  
C O 4.905641 1.579383 -0.222687  
C O 4.921101 3.112057 -0.285076  
C O 6.253502 3.720441 0.164611  
H O 0.792088 -2.801451 -2.773364  
H O 1.920028 -0.748129 -1.977223  
H O -0.819855 -1.008931 1.797794  
H O -3.482069 -3.940610 1.745052  
H O -4.784342 -2.729660 1.971724  
H O -3.198143 -2.494487 2.773364  
H O -0.985354 1.069439 0.614742  
H O -2.618602 0.453018 0.919174  
H O -3.710795 1.875650 -2.418471  
H O -3.535058 2.230147 -0.693927  
H O -4.974229 -0.204382 -1.890176  
H O -4.449234 -0.747125 0.216115  
H O -6.703554 0.709366 0.270759  
H O -0.150148 -4.814813 -1.851488  
H O 3.193372 -3.886247 -2.506605  
H O 2.661010 -4.570788 -0.145224  
H O 2.018570 -3.282297 0.880509  
H O 3.706621 -3.217706 0.332058  
H O 3.817140 -0.900670 0.411437  
H O 4.351623 -0.965445 -1.267423  
H O 2.763740 1.354884 -0.028540  
H O 3.341841 1.288777 -1.689264  
H O 5.132477 1.256561 0.804330  
H O 5.714893 1.182064 -0.853253  
H O 4.108237 3.507432 0.340531  
H O 4.699919 3.434553 -1.312428  
H O 6.484127 3.446087 1.201594  
H O 6.233357 4.814813 0.105870  
H O 7.081367 3.367612 -0.462964  
Free Energy (PCM/B3LYP/6-31G\*) = -1757.655562  
Number of imaginary frequencies = 0

### 1-3S-c6

B3LYP/6-31G\* geometry  
O O -1.926596 -0.204306 -0.495809  
C O -3.116607 -2.097737 0.338079  
C O -4.240530 0.092708 0.410395  
C O -4.206796 -1.335526 1.022065  
C O -2.776350 0.624712 0.376711  
C O -2.126082 -1.512551 -0.362810

C O -1.221370 -2.529975 -1.016317  
N O -1.726705 -3.770849 -0.391158  
C O -2.986229 -3.540122 0.204094  
O O -1.644898 -4.900705 -1.224978  
C O -0.925621 -5.952069 -0.563975  
C O 0.281224 -2.304984 -0.846053  
S O 0.773444 -2.315465 0.930429  
C O 2.318785 -1.331877 0.879833  
C O 3.549681 -2.120017 0.386766  
C O 4.785180 -1.224244 0.453014  
O O 3.398945 -2.595756 -0.933440  
O O 5.344605 -0.805231 -0.542061  
O O 5.151989 -0.932219 1.706875  
O O -3.785022 -4.413564 0.538135  
O O -5.478216 -1.964686 0.875314  
O O -4.919187 0.974309 1.310599  
C O -4.913620 0.113723 -0.966467  
C O -2.617136 2.063187 -0.095153  
C O -1.199941 2.621189 0.100623  
C O -1.069586 4.074714 -0.370713  
C O 0.338193 4.654203 -0.180220  
C O 0.460788 6.105919 -0.654340  
H O -3.983156 -1.216439 2.094278  
H O -2.362359 0.517383 1.387654  
H O -1.433501 -2.574338 -2.094278  
H O 0.084358 -5.628790 -0.291259  
H O -0.874782 -6.760782 -1.296911  
H O -1.463720 -6.290646 0.326682  
H O 0.538926 -1.331191 -1.272576  
H O 0.835258 -3.070453 -1.390829  
H O 2.485377 -0.999061 1.908522  
H O 2.162572 -0.444978 0.256142  
H O 3.706005 -2.978497 1.049908  
H O 3.887035 -1.971229 -1.503059  
H O 5.922132 -0.331318 1.666817  
H O -5.319395 -2.924976 0.952761  
H O -5.805188 0.599755 1.451454  
H O -5.922132 -0.299920 -0.887236  
H O -4.364507 -0.482677 -1.701373  
H O -4.984214 1.140826 -1.333415  
H O -2.897282 2.128043 -1.153585  
H O -3.337137 2.669843 0.464663  
H O -0.928206 2.556404 1.164270  
H O -0.480316 1.994829 -0.442304  
H O -1.346437 4.138174 -1.433600  
H O -1.795320 4.699170 0.171235  
H O 1.062593 4.029342 -0.721743  
H O 0.614644 4.591286 0.881840  
H O 0.221640 6.195195 -1.721419  
H O 1.476578 6.490419 -0.506741  
H O -0.227203 6.760782 -0.105276

Free Energy (PCM/B3LYP/6-31G\*) = -1757.655438  
Number of imaginary frequencies = 0

### 2-3R-c1

B3LYP/6-31G\* geometry

O O 1.861966 -1.193168 0.032163  
C O 1.660852 -3.550197 -0.331360  
C O 3.916309 -2.639192 0.135670  
C O 3.120263 -3.822846 -0.482723  
C O 3.280591 -1.300817 -0.353751  
C O 1.161774 -2.314563 -0.101867  
C O -0.339832 -2.326902 0.059632  
N O -0.579747 -3.783014 0.095561  
C O 0.547199 -4.496195 -0.372793  
O O -1.820343 -4.169560 -0.446077  
C O -2.520699 -5.013289 0.477913  
C O -0.884561 -1.644283 1.323652  
S O -0.843282 0.197832 1.296393  
C O -2.584581 0.646333 0.934026  
C O -2.954935 0.632232 -0.562922  
C O -4.396411 1.109107 -0.730198  
O O -2.827465 -0.646321 -1.147089  
O O -5.302366 0.360747 -1.042438  
O O -4.548150 2.411914 -0.462228  
O O 0.538080 -5.677219 -0.698006  
O O 3.527937 -3.898858 -1.864721

O O 5.254629 -2.686658 -0.348790  
C O 3.971154 -2.749196 1.659095  
C O 3.962864 -0.034736 0.144655  
C O 3.475921 1.242208 -0.554763  
C O 4.181442 2.504847 -0.044217  
C O 3.707619 3.789313 -0.736277  
C O 4.411417 5.048147 -0.218880  
H O 3.402482 -4.752257 0.026957  
H O 3.287573 -1.325478 -1.451124  
H O -0.834632 -1.897871 -0.819192  
H O -2.684955 -4.504088 1.433807  
H O -1.974765 -5.947241 0.641251  
H O -3.479730 -5.222690 -0.002449  
H O -0.315429 -1.967308 2.199699  
H O -1.923312 -1.951026 1.464142  
H O -2.706114 1.659437 1.328761  
H O -3.250857 -0.016743 1.495752  
H O -2.292589 1.321869 -1.097509  
H O -3.720583 -1.039737 -1.146205  
H O -5.495912 2.633727 -0.552940  
H O 3.294710 -4.779172 -2.199699  
H O 5.185998 -3.076044 -1.242678  
H O 4.370553 -3.726968 1.945430  
H O 2.982966 -2.628905 2.112427  
H O 4.632630 -1.980678 2.068653  
H O 3.809695 0.054942 1.227442  
H O 5.038803 -0.163322 -0.018886  
H O 3.638986 1.145752 -1.638154  
H O 2.392458 1.346693 -0.412231  
H O 4.020435 2.597792 1.040151  
H O 5.267563 2.397200 -0.183177  
H O 2.621998 3.894129 -0.599009  
H O 3.870679 3.697910 -1.819581  
H O 4.237664 5.185435 0.855687  
H O 4.051433 5.947241 -0.732317  
H O 5.495912 4.987302 -0.373528

Free Energy (PCM/B3LYP/6-31G\*) = -1757.658874  
Number of imaginary frequencies = 0

### 2-3R-c2

B3LYP/6-31G\* geometry

O O 1.297287 -0.924560 -0.057845  
C O 0.255260 -3.064626 -0.335352  
C O 2.677351 -3.016433 0.172773  
C O 1.517712 -3.854893 -0.435981  
C O 2.589468 -1.560503 -0.383873  
C O 0.243097 -1.723706 -0.169694  
C O -1.157697 -1.170982 -0.053072  
N O -1.930692 -2.426649 0.011334  
C O -1.127821 -3.527909 -0.393702  
O O -3.193167 -2.365995 -0.625360  
C O -4.210494 -2.921990 0.226373  
C O -1.325571 -0.255721 1.167064  
S O -2.994257 0.461456 1.439070  
C O -3.138362 1.718335 0.098489  
C O -3.974453 1.281994 -1.124543  
C O -5.415532 0.955403 -0.730476  
O O -3.408777 0.222310 -1.854124  
O O -5.929576 -0.136340 -0.852983  
O O -6.047610 2.027162 -0.217606  
O O -1.570823 -4.629238 -0.689828  
O O 1.894013 -4.121500 -1.802487  
O O 3.915138 -3.569989 -0.261366  
C O 2.655469 -3.071624 1.700079  
C O 3.674313 -0.610687 0.102511  
C O 3.708236 0.724737 -0.654269  
C O 4.810895 1.663760 -0.149606  
C O 4.859685 3.003478 -0.895436  
C O 5.960565 3.938265 -0.383806  
H O 1.434597 -4.803755 0.107317  
H O 2.613759 -1.633303 -1.478550  
H O -1.422170 -0.624442 -0.966492  
H O -4.235575 -2.399450 1.186253  
H O -4.032879 -3.990295 0.370873  
H O -5.144771 -2.757166 -0.312971  
H O -0.598182 0.559065 1.104199  
H O -1.119610 -0.821504 2.080707

H O -2.133141 1.986834 -0.237554  
H O -3.590698 2.605611 0.549357  
H O -4.011534 2.146719 -1.799384  
H O -3.595913 -0.619444 -1.387530  
H O -6.951332 1.749928 0.030107  
H O 1.382931 -4.885281 -2.113707  
H O 3.729426 -3.938998 -1.147310  
H O 2.655397 -4.113872 2.033567  
H O 1.774675 -2.572187 2.113707  
H O 3.547324 -2.586564 2.106308  
H O 3.536720 -0.425174 1.175161  
H O 4.632042 -1.130118 -0.014053  
H O 3.856762 0.529451 -1.726287  
H O 2.734163 1.222608 -0.562101  
H O 4.663735 1.852733 0.924200  
H O 5.786040 1.162498 -0.240211  
H O 3.884301 3.502473 -0.805550  
H O 5.008412 2.815336 -1.968242  
H O 5.818665 4.172463 0.678607  
H O 5.969443 4.885281 -0.935732  
H O 6.951332 3.479614 -0.492079  
Free Energy (PCM/B3LYP/6-31G\*) = -1757.658849  
Number of imaginary frequencies = 0

### 2-3R-c3

B3LYP/6-31G\* geometry  
O O -0.912080 -1.416251 -0.721948  
C O -3.271978 -1.687308 -0.415627  
C O -1.762500 -3.265993 0.752229  
C O -3.204483 -3.037886 0.216720  
C O -0.747216 -2.835520 -0.352169  
C O -2.173685 -1.012186 -0.820239  
C O -2.515439 0.345150 -1.388462  
N O -3.949345 0.410535 -1.054649  
C O -4.448123 -0.867029 -0.704870  
O O -4.713525 1.138711 -1.985050  
C O -5.494759 2.135876 -1.311537  
C O -1.756564 1.543963 -0.801851  
S O 0.000431 1.583615 -1.365403  
C O 0.324754 3.389063 -1.437331  
C O 0.556959 4.066354 -0.078578  
C O 1.680416 3.405053 0.713865  
O O -0.619073 4.069516 0.701720  
O O 1.521298 2.981966 1.842987  
O O 2.838489 3.362704 0.046178  
O O -5.635788 -1.155978 -0.641056  
O O -3.450734 -4.101056 -0.726966  
O O -1.580828 -4.658050 0.989349  
C O -1.541415 -2.537631 2.077492  
C O 0.720697 -3.025274 0.001228  
C O 1.668362 -2.850566 -1.193801  
C O 3.141365 -3.056017 -0.818639  
C O 4.100074 -2.890742 -2.004719  
C O 5.570612 -3.091786 -1.624289  
H O -3.915757 -3.121247 1.047313  
H O -0.994971 -3.406228 -1.256395  
H O -2.398516 0.332570 -2.480713  
H O -6.007082 2.678456 -2.109822  
H O -4.856839 2.820944 -0.743027  
H O -6.229045 1.670098 -0.647522  
H O -1.811810 1.533729 0.288451  
H O -2.237181 2.457396 -1.159636  
H O -0.506950 3.887174 -1.944131  
H O 1.216286 3.501791 -2.060486  
H O 0.872954 5.102594 -0.282095  
H O -0.377078 3.657227 1.553372  
H O 3.503933 2.931160 0.617272  
H O -4.410373 -4.189803 -0.839331  
H O -2.142125 -5.102594 0.323925  
H O -2.316224 -2.826740 2.794165  
H O -1.566095 -1.451109 1.954640  
H O -0.570848 -2.813199 2.499330  
H O 0.993715 -2.321299 0.797198  
H O 0.823367 -4.034838 0.414666  
H O 1.389943 -3.564010 -1.983141  
H O 1.537629 -1.848154 -1.621909  
H O 3.417870 -2.343132 -0.027608

H O 3.270312 -4.058622 -0.384296  
H O 3.967758 -1.889695 -2.439305  
H O 3.824987 -3.604564 -2.794165  
H O 5.883564 -2.370009 -0.859504  
H O 6.229045 -2.965230 -2.491478  
H O 5.741137 -4.097252 -1.219763  
Free Energy (PCM/B3LYP/6-31G\*) = -1757.658434  
Number of imaginary frequencies = 0

### 2-3R-c4

B3LYP/6-31G\* geometry  
O O 0.722647 -0.511680 -0.824456  
C O -0.266992 -2.669196 -0.487484  
C O 1.668056 -2.050088 0.926775  
C O 0.832676 -3.229667 0.351759  
C O 1.963860 -1.038343 -0.224887  
C O -0.237211 -1.413881 -0.985709  
C O -1.480222 -1.085716 -1.775544  
N O -2.311725 -2.257274 -1.452682  
C O -1.522029 -3.297353 -0.902608  
O O -3.190554 -2.633834 -2.483929  
C O -4.538809 -2.673140 -1.994838  
C O -2.141040 0.260371 -1.473690  
S O -2.721663 0.354046 0.273749  
C O -2.876619 2.169256 0.503353  
C O -4.135461 2.798729 -0.111572  
C O -5.416493 2.136296 0.386550  
O O -4.104088 2.739846 -1.521848  
O O -6.246346 1.668836 -0.370023  
O O -5.528749 2.147303 1.719043  
O O -1.886373 -4.460392 -0.792961  
O O 1.754361 -4.035462 -0.411969  
O O 2.916685 -2.558187 1.385946  
C O 0.962320 -1.404422 2.118593  
C O 2.803007 0.168862 0.168800  
C O 3.274390 1.006493 -1.028050  
C O 4.134978 2.206010 -0.611082  
C O 4.606810 3.057713 -1.796281  
C O 5.467375 4.253271 -1.374336  
H O 0.433474 -3.826808 1.180384  
H O 2.462871 -1.599517 -1.025362  
H O -1.240994 -1.103624 -2.849095  
H O -5.146562 -2.930707 -2.865745  
H O -4.844710 -1.698911 -1.599066  
H O -4.649638 -3.441639 -1.223703  
H O -2.980413 0.417353 -2.151964  
H O -1.412470 1.058234 -1.644238  
H O -1.993722 2.665259 0.089745  
H O -2.878776 2.331044 1.584698  
H O -4.167342 3.850033 0.218962  
H O -4.945441 2.323359 -1.791399  
H O -6.371106 1.712722 1.957399  
H O 1.368458 -4.919608 -0.515872  
H O 3.113850 -3.312598 0.796566  
H O 0.724562 -2.168011 2.865745  
H O 0.036110 -0.903795 1.821713  
H O 1.618323 -0.665706 2.587691  
H O 2.227793 0.799437 0.858180  
H O 3.668287 -0.209444 0.724656  
H O 3.848176 0.367098 -1.714646  
H O 2.402050 1.361676 -1.591928  
H O 3.564339 2.838716 0.084924  
H O 5.010929 1.848237 -0.049723  
H O 3.730406 3.415990 -2.354916  
H O 5.174812 2.425028 -2.493120  
H O 4.914988 4.919608 -0.700166  
H O 5.784407 4.844061 -2.241519  
H O 6.371106 3.923796 -0.846725  
Free Energy (PCM/B3LYP/6-31G\*) = -1757.658353  
Number of imaginary frequencies = 0

### 2-3R-c5

B3LYP/6-31G\* geometry  
O O 0.548057 -0.745127 -0.319995  
C O -1.278266 0.772861 0.012483  
C O 0.612030 1.516450 -1.417132  
C O -0.615748 1.975735 -0.570494

|     |           |           |           |
|-----|-----------|-----------|-----------|
| C 0 | 1.394271  | 0.425631  | -0.619331 |
| C 0 | -0.680540 | -0.437325 | 0.077785  |
| C 0 | -1.599517 | -1.489995 | 0.644835  |
| N 0 | -2.660728 | -0.614808 | 1.167225  |
| C 0 | -2.639941 | 0.629557  | 0.536322  |
| O 0 | -3.888201 | -1.207069 | 1.447896  |
| C 0 | -4.156177 | -1.157720 | 2.861932  |
| C 0 | -2.112054 | -2.523980 | -0.389664 |
| S 0 | -2.694374 | -1.831806 | -1.996622 |
| C 0 | -4.515004 | -2.066850 | -2.025499 |
| C 0 | -5.351211 | -1.008189 | -1.285708 |
| C 0 | -6.844376 | -1.284624 | -1.523862 |
| O 0 | -5.063869 | 0.316984  | -1.722499 |
| O 0 | -7.362639 | -2.368095 | -1.344829 |
| O 0 | -7.535354 | -0.216770 | -1.941805 |
| O 0 | -3.597067 | 1.406645  | 0.467958  |
| O 0 | -0.105049 | 2.854984  | 0.456030  |
| O 0 | 1.481059  | 2.629596  | -1.587843 |
| C 0 | 0.178900  | 1.045949  | -2.805012 |
| C 0 | 2.647950  | -0.106897 | -1.297980 |
| C 0 | 3.511785  | -0.986655 | -0.383295 |
| C 0 | 4.771593  | -1.515384 | -1.080344 |
| C 0 | 5.639747  | -2.400202 | -0.176639 |
| C 0 | 6.895591  | -2.930074 | -0.876429 |
| H 0 | -1.305904 | 2.533795  | -1.212825 |
| H 0 | 1.649877  | 0.861943  | 0.355503  |
| H 0 | -1.117245 | -2.041803 | 1.460150  |
| H 0 | -5.113546 | -1.668509 | 2.982186  |
| H 0 | -4.236170 | -0.121056 | 3.201005  |
| H 0 | -3.376354 | -1.681472 | 3.422974  |
| H 0 | -2.913038 | -3.111935 | 0.063600  |
| H 0 | -1.285001 | -3.200405 | -0.620038 |
| H 0 | -4.774062 | -3.062240 | -1.656955 |
| H 0 | -4.750579 | -2.037389 | -3.094582 |
| H 0 | -5.179533 | -1.099657 | -0.209894 |
| H 0 | -4.628256 | 0.796361  | -0.984294 |
| H 0 | -6.867203 | 0.507999  | -2.011777 |
| H 0 | -0.754854 | 3.558757  | 0.606979  |
| H 0 | 1.356606  | 3.163505  | -0.777239 |
| H 0 | -0.397962 | 1.835024  | -3.297374 |
| H 0 | -0.436811 | 0.143514  | -2.756898 |
| H 0 | 1.056034  | 0.834225  | -3.422974 |
| H 0 | 2.360851  | -0.672883 | -2.192959 |
| H 0 | 3.223690  | 0.761531  | -1.637147 |
| H 0 | 3.801884  | -0.408275 | 0.505976  |
| H 0 | 2.913461  | -1.832614 | -0.020674 |
| H 0 | 4.480228  | -2.086863 | -1.974146 |
| H 0 | 5.371496  | -0.667283 | -1.442545 |
| H 0 | 5.038045  | -3.245914 | 0.185588  |
| H 0 | 5.931528  | -1.828938 | 0.716107  |
| H 0 | 6.634835  | -3.533672 | -1.754722 |
| H 0 | 7.491947  | -3.558757 | -0.205107 |
| H 0 | 7.535354  | -2.107107 | -1.218647 |

Free Energy (PCM/B3LYP/6-31G\*) = -1757.658338  
Number of imaginary frequencies = 0

### 2-3R-c6

B3LYP/6-31G\* geometry

|     |           |           |           |
|-----|-----------|-----------|-----------|
| O 0 | 0.942501  | -0.266570 | -0.000242 |
| C 0 | -0.581256 | 1.583859  | -0.098703 |
| C 0 | 1.438614  | 1.655372  | -1.538086 |
| C 0 | 0.311185  | 2.499125  | -0.868906 |
| C 0 | 1.994920  | 0.644140  | -0.487340 |
| C 0 | -0.220433 | 0.328412  | 0.243931  |
| C 0 | -1.318858 | -0.407434 | 0.971533  |
| N 0 | -2.236740 | 0.717609  | 1.216025  |
| C 0 | -1.947343 | 1.818342  | 0.384567  |
| O 0 | -3.586008 | 0.407071  | 1.405111  |
| C 0 | -4.014325 | 0.800733  | 2.724403  |
| C 0 | -1.919194 | -1.587573 | 0.178628  |
| S 0 | -2.527436 | -1.112377 | -1.496395 |
| C 0 | -4.182903 | -1.899269 | -1.575456 |
| C 0 | -5.219466 | -1.316679 | -0.602483 |
| C 0 | -6.592860 | -1.961139 | -0.846983 |
| O 0 | -5.370314 | 0.089755  | -0.728982 |
| O 0 | -6.758033 | -3.156396 | -0.972604 |
| O 0 | -7.605965 | -1.086961 | -0.890962 |

|     |           |           |           |
|-----|-----------|-----------|-----------|
| O 0 | -2.707022 | 2.755590  | 0.182951  |
| O 0 | 0.968349  | 3.458579  | -0.012016 |
| O 0 | 2.499389  | 2.531020  | -1.901166 |
| C 0 | 0.939224  | 0.975830  | -2.812856 |
| C 0 | 3.142676  | -0.231689 | -0.967474 |
| C 0 | 3.814477  | -1.033792 | 0.156209  |
| C 0 | 4.981807  | -1.894179 | -0.342923 |
| C 0 | 5.659501  | -2.704951 | 0.769158  |
| C 0 | 6.825061  | -3.562579 | 0.265854  |
| H 0 | -0.247330 | 3.032878  | -1.645879 |
| H 0 | 2.308674  | 1.229408  | 0.387333  |
| H 0 | -0.946896 | -0.809150 | 1.922303  |
| H 0 | -5.064466 | 0.507056  | 2.779843  |
| H 0 | -3.915509 | 1.882118  | 2.847007  |
| H 0 | -3.432496 | 0.273691  | 3.485570  |
| H 0 | -2.743187 | -2.017108 | 0.750977  |
| H 0 | -1.143664 | -2.351625 | 0.079991  |
| H 0 | -4.104340 | -2.978894 | -1.429530 |
| H 0 | -4.502913 | -1.720099 | -2.606846 |
| H 0 | -4.939943 | -1.575484 | 0.426280  |
| H 0 | -4.773841 | 0.504815  | -0.072411 |
| H 0 | -7.196298 | -0.197166 | -0.776557 |
| H 0 | 0.454437  | 4.280840  | -0.024013 |
| H 0 | 2.476959  | 3.237560  | -1.224776 |
| H 0 | 0.507313  | 1.723263  | -3.485570 |
| H 0 | 0.180485  | 0.216949  | -2.601837 |
| H 0 | 1.771604  | 0.493851  | -3.333392 |
| H 0 | 2.776167  | -0.916425 | -1.742607 |
| H 0 | 3.873986  | 0.431045  | -1.443536 |
| H 0 | 4.177084  | -0.340368 | 0.929071  |
| H 0 | 3.069038  | -1.676646 | 0.642308  |
| H 0 | 4.620304  | -2.581275 | -1.122499 |
| H 0 | 5.728796  | -1.248422 | -0.828130 |
| H 0 | 4.912031  | -3.350181 | 1.252418  |
| H 0 | 6.019866  | -2.018999 | 1.548994  |
| H 0 | 6.489300  | -4.280840 | -0.492543 |
| H 0 | 7.285255  | -4.130675 | 1.082571  |
| H 0 | 7.605965  | -2.941109 | -0.189774 |

Free Energy (PCM/B3LYP/6-31G\*) = -1757.658178  
Number of imaginary frequencies = 0

### 2-3R-c7

B3LYP/6-31G\* geometry

|     |           |           |           |
|-----|-----------|-----------|-----------|
| O 0 | -0.300073 | -1.016927 | -0.904441 |
| C 0 | -2.095154 | -2.529870 | -0.420324 |
| C 0 | -0.038415 | -2.698775 | 0.949589  |
| C 0 | -1.314182 | -3.444508 | 0.464241  |
| C 0 | 0.618651  | -1.984858 | -0.273842 |
| C 0 | -1.554927 | -1.442826 | -1.012615 |
| C 0 | -2.561550 | -0.693035 | -1.848914 |
| N 0 | -3.800216 | -1.379087 | -1.445186 |
| C 0 | -3.504250 | -2.608671 | -0.807386 |
| O 0 | -4.767706 | -1.440702 | -2.466351 |
| C 0 | -6.025505 | -0.947200 | -1.985744 |
| C 0 | -2.609755 | 0.827812  | -1.680810 |
| S 0 | -2.926381 | 1.395182  | 0.045862  |
| C 0 | -1.300675 | 2.107502  | 0.526264  |
| C 0 | -1.014523 | 3.516169  | -0.018427 |
| C 0 | -2.101026 | 4.515202  | 0.366383  |
| O 0 | -0.866095 | 3.515579  | -1.422876 |
| O 0 | -2.720079 | 5.158525  | -0.459469 |
| O 0 | -2.282311 | 4.607229  | 1.688260  |
| O 0 | -4.315416 | -3.505670 | -0.619344 |
| O 0 | -0.850522 | -4.618538 | -0.234130 |
| O 0 | 0.893167  | -3.657385 | 1.439456  |
| C 0 | -0.369630 | -1.743104 | 2.094951  |
| C 0 | 1.908760  | -1.234826 | 0.022732  |
| C 0 | 2.652864  | -0.769047 | -1.237028 |
| C 0 | 3.950844  | -0.017918 | -0.916066 |
| C 0 | 4.707413  | 0.452796  | -2.164925 |
| C 0 | 6.000362  | 1.206807  | -1.837719 |
| H 0 | -1.904958 | -3.753120 | 1.334995  |
| H 0 | 0.799387  | -2.755980 | -1.033796 |
| H 0 | -2.372621 | -0.903804 | -2.912763 |
| H 0 | -6.694211 | -0.992582 | -2.848867 |
| H 0 | -5.937551 | 0.086843  | -1.635189 |
| H 0 | -6.411168 | -1.582545 | -1.182821 |

|     |           |           |           |
|-----|-----------|-----------|-----------|
| H O | -3.414045 | 1.218144  | -2.309700 |
| H O | -1.678228 | 1.281344  | -2.021869 |
| H O | -0.504973 | 1.431569  | 0.204122  |
| H O | -1.301175 | 2.133124  | 1.619388  |
| H O | -0.077782 | 3.858734  | 0.449146  |
| H O | -1.550833 | 4.121925  | -1.765823 |
| H O | -2.989258 | 5.261411  | 1.854149  |
| H O | -1.576683 | -5.261411 | -0.258917 |
| H O | 0.730402  | -4.461678 | 0.908291  |
| H O | -0.837542 | -2.299882 | 2.912763  |
| H O | -1.054182 | -0.951965 | 1.775992  |
| H O | 0.542362  | -1.278771 | 2.480368  |
| H O | 1.687762  | -0.371263 | 0.662818  |
| H O | 2.545257  | -1.910709 | 0.604839  |
| H O | 2.882169  | -1.642091 | -1.865289 |
| H O | 1.995291  | -0.122815 | -1.832967 |
| H O | 3.720058  | 0.852221  | -0.283481 |
| H O | 4.607631  | -0.665388 | -0.316194 |
| H O | 4.049081  | 1.097496  | -2.764465 |
| H O | 4.940335  | -0.416524 | -2.796189 |
| H O | 5.795574  | 2.099374  | -1.233377 |
| H O | 6.515375  | 1.531961  | -2.749068 |
| H O | 6.694211  | 0.574673  | -1.269709 |

Free Energy (PCM/B3LYP/6-31G\*) = -1757.658084  
Number of imaginary frequencies = 0

**2-3R-c8**

B3LYP/6-31G\* geometry

|     |           |           |           |
|-----|-----------|-----------|-----------|
| O O | 1.387749  | -0.968812 | -0.881130 |
| C O | 1.057663  | -3.305410 | -0.456252 |
| C O | 2.710706  | -2.097868 | 0.935057  |
| C O | 2.260447  | -3.490370 | 0.408479  |
| C O | 2.720073  | -1.092238 | -0.258704 |
| C O | 0.730834  | -2.115182 | -1.005570 |
| C O | -0.545939 | -2.190103 | -1.806534 |
| N O | -1.010348 | -3.537247 | -1.436098 |
| C O | 0.041353  | -4.283457 | -0.844852 |
| O O | -1.722577 | -4.190784 | -2.458883 |
| C O | -2.994232 | -4.638254 | -1.968347 |
| C O | -1.566452 | -1.078395 | -1.547789 |
| S O | -2.182171 | -1.113139 | 0.188623  |
| C O | -2.681440 | 0.636578  | 0.399413  |
| C O | -4.001413 | 1.015441  | -0.310874 |
| C O | -4.287363 | 2.496317  | -0.069029 |
| O O | -5.097686 | 0.255234  | 0.142154  |
| O O | -5.183288 | 2.879756  | 0.658113  |
| O O | -3.433349 | 3.305386  | -0.708325 |
| O O | 0.025152  | -5.496787 | -0.689055 |
| O O | 3.387004  | -4.024570 | -0.317695 |
| O O | 4.045339  | -2.204708 | 1.419622  |
| C O | 1.829090  | -1.635675 | 2.094547  |
| C O | 3.175158  | 0.320146  | 0.078803  |
| C O | 3.434973  | 1.190145  | -1.159173 |
| C O | 3.897578  | 2.608945  | -0.805394 |
| C O | 4.176678  | 3.481494  | -2.035944 |
| C O | 4.634697  | 4.899506  | -1.679587 |
| H O | 2.037850  | -4.143369 | 1.260889  |
| H O | 3.368429  | -1.521282 | -1.033415 |
| H O | -0.303014 | -2.178881 | -2.879100 |
| H O | -3.587680 | -3.800550 | -1.587253 |
| H O | -2.865220 | -5.392150 | -1.185847 |
| H O | -3.489038 | -5.083576 | -2.834958 |
| H O | -2.398959 | -1.189158 | -2.247551 |
| H O | -1.084877 | -0.113486 | -1.734159 |
| H O | -1.867928 | 1.289079  | 0.067969  |
| H O | -2.807527 | 0.769682  | 1.478764  |
| H O | -3.890781 | 0.860492  | -1.390459 |
| H O | -5.561026 | 0.815555  | 0.793287  |
| H O | -3.656915 | 4.228335  | -0.476240 |
| H O | 3.284741  | -4.987914 | -0.369947 |
| H O | 4.460116  | -2.893790 | 0.863998  |
| H O | 1.820051  | -2.398703 | 2.879100  |
| H O | 0.799512  | -1.449803 | 1.774257  |
| H O | 2.228111  | -0.713104 | 2.525851  |
| H O | 2.423662  | 0.798783  | 0.719134  |
| H O | 4.092392  | 0.228883  | 0.671310  |
| H O | 4.195930  | 0.704530  | -1.787375 |

|     |          |          |           |
|-----|----------|----------|-----------|
| H O | 2.521777 | 1.244851 | -1.766184 |
| H O | 3.133555 | 3.096112 | -0.181456 |
| H O | 4.805767 | 2.552221 | -0.187044 |
| H O | 3.269381 | 3.534361 | -2.654533 |
| H O | 4.941636 | 2.994965 | -2.657638 |
| H O | 3.875921 | 5.422701 | -1.084377 |
| H O | 4.822777 | 5.496787 | -2.579287 |
| H O | 5.561026 | 4.880589 | -1.092083 |

Free Energy (PCM/B3LYP/6-31G\*) = -1757.658005  
Number of imaginary frequencies = 0

**2-3R-c9**

B3LYP/6-31G\* geometry

|     |           |           |           |
|-----|-----------|-----------|-----------|
| O O | 0.167686  | -0.410313 | -0.818964 |
| C O | -0.880170 | -2.542960 | -0.502639 |
| C O | 1.224141  | -2.094414 | 0.723850  |
| C O | 0.275846  | -3.200004 | 0.176097  |
| C O | 1.441272  | -1.021774 | -0.389079 |
| C O | -0.842466 | -1.263425 | -0.932025 |
| C O | -2.152480 | -0.830038 | -1.548709 |
| N O | -2.997088 | -1.989358 | -1.216005 |
| C O | -2.196155 | -3.093488 | -0.824914 |
| O O | -3.979279 | -2.270268 | -2.188968 |
| C O | -5.254055 | -2.471763 | -1.560554 |
| C O | -2.657100 | 0.502287  | -0.986296 |
| S O | -4.159141 | 1.066457  | -1.896562 |
| C O | -4.253005 | 2.834916  | -1.409809 |
| C O | -4.768135 | 3.077130  | 0.018673  |
| C O | -3.666505 | 2.871738  | 1.076440  |
| O O | -5.916314 | 2.302692  | 0.347729  |
| O O | -2.559393 | 3.359117  | 0.988606  |
| O O | -4.044905 | 2.124050  | 2.121030  |
| O O | -2.596092 | -4.247764 | -0.759234 |
| O O | 1.068857  | -3.992604 | -0.731098 |
| O O | 2.489349  | -2.681565 | 1.007880  |
| C O | 0.685404  | -1.499549 | 2.024700  |
| C O | 2.367184  | 0.127140  | -0.015601 |
| C O | 2.770031  | 1.002679  | -1.210350 |
| C O | 3.691939  | 2.162653  | -0.813077 |
| C O | 4.111654  | 3.039399  | -1.999612 |
| C O | 5.023837  | 4.202639  | -1.596093 |
| H O | -0.061045 | -3.830716 | 1.007378  |
| H O | 1.827366  | -1.547334 | -1.271704 |
| H O | -2.045221 | -0.760685 | -2.640057 |
| H O | -5.947389 | -2.648695 | -2.386449 |
| H O | -5.559612 | -1.582260 | -1.000356 |
| H O | -5.225966 | -3.345568 | -0.903739 |
| H O | -1.878694 | 1.259631  | -1.112455 |
| H O | -2.873957 | 0.387135  | 0.078290  |
| H O | -4.954265 | 3.273455  | -2.124506 |
| H O | -3.281117 | 3.316963  | -1.538245 |
| H O | -5.062103 | 4.131308  | 0.091212  |
| H O | -5.855510 | 1.471466  | -0.167870 |
| H O | -4.980121 | 1.868072  | 1.941727  |
| H O | 0.648861  | -4.862673 | -0.820075 |
| H O | 2.582848  | -3.404597 | 0.356493  |
| H O | 0.495035  | -2.298940 | 2.747408  |
| H O | -0.243321 | -0.943774 | 1.865840  |
| H O | 1.422084  | -0.818514 | 2.459964  |
| H O | 1.882071  | 0.745132  | 0.750125  |
| H O | 3.259451  | -0.313373 | 0.443230  |
| H O | 3.272588  | 0.378099  | -1.963131 |
| H O | 1.867909  | 1.402771  | -1.691381 |
| H O | 3.186259  | 2.787361  | -0.061915 |
| H O | 4.591268  | 1.762262  | -0.321830 |
| H O | 3.212091  | 3.433506  | -2.493535 |
| H O | 4.621917  | 2.415797  | -2.747408 |
| H O | 4.526639  | 4.862673  | -0.874465 |
| H O | 5.306044  | 4.809636  | -2.464125 |
| H O | 5.947389  | 3.837939  | -1.129489 |

Free Energy (PCM/B3LYP/6-31G\*) = -1757.657819  
Number of imaginary frequencies = 0

**2-3R-c10**

B3LYP/6-31G\* geometry

|     |           |           |           |
|-----|-----------|-----------|-----------|
| O O | 1.001053  | -0.923439 | -0.083583 |
| C O | -0.018187 | -3.075330 | -0.355551 |

|     |           |           |           |
|-----|-----------|-----------|-----------|
| C 0 | 2.400332  | -2.999367 | 0.168964  |
| C 0 | 1.253113  | -3.853961 | -0.442538 |
| C 0 | 2.301813  | -1.549035 | -0.399593 |
| C 0 | -0.042986 | -1.733835 | -0.195659 |
| C 0 | -1.450417 | -1.194562 | -0.083656 |
| N 0 | -2.210775 | -2.455770 | -0.014611 |
| C 0 | -1.396507 | -3.551541 | -0.419742 |
| O 0 | -3.471577 | -2.400276 | -0.659636 |
| C 0 | -4.484361 | -2.996910 | 0.173734  |
| C 0 | -1.637046 | -0.281107 | 1.134614  |
| S 0 | -3.327495 | 0.388950  | 1.390839  |
| C 0 | -3.468372 | 1.644657  | 0.046471  |
| C 0 | -4.434687 | 1.259412  | -1.074843 |
| C 0 | -5.887698 | 1.142546  | -0.574961 |
| O 0 | -4.074786 | 0.105386  | -1.823579 |
| O 0 | -6.357990 | 1.822668  | 0.311586  |
| O 0 | -6.619268 | 0.240968  | -1.247549 |
| O 0 | -1.831653 | -4.654865 | -0.715989 |
| O 0 | 1.639906  | -4.125354 | -1.804693 |
| O 0 | 3.645839  | -3.543872 | -0.252899 |
| C 0 | 2.368456  | -3.043340 | 1.696491  |
| C 0 | 3.374696  | -0.583674 | 0.082338  |
| C 0 | 3.401328  | 0.741096  | -0.693347 |
| C 0 | 4.491831  | 1.698471  | -0.196951 |
| C 0 | 4.535654  | 3.023804  | -0.968464 |
| C 0 | 5.623731  | 3.978320  | -0.466052 |
| H 0 | 1.175515  | -4.799497 | 0.107009  |
| H 0 | 2.330369  | -1.629966 | -1.493559 |
| H 0 | -1.711570 | -0.658290 | -1.005568 |
| H 0 | -4.538332 | -2.486162 | 1.138644  |
| H 0 | -4.275316 | -4.060262 | 0.306669  |
| H 0 | -5.416575 | -2.861292 | -0.379263 |
| H 0 | -0.928883 | 0.550370  | 1.075862  |
| H 0 | -1.421113 | -0.844210 | 2.047270  |
| H 0 | -2.474681 | 1.831876  | -0.367893 |
| H 0 | -3.824861 | 2.569020  | 0.505480  |
| H 0 | -4.433568 | 2.084928  | -1.799538 |
| H 0 | -3.912071 | -0.655189 | -1.220672 |
| H 0 | -6.010472 | -0.182814 | -1.893095 |
| H 0 | 1.160810  | -4.913706 | -2.105027 |
| H 0 | 3.469614  | -3.919754 | -1.138017 |
| H 0 | 2.378321  | -4.083018 | 2.037701  |
| H 0 | 1.479249  | -2.551241 | 2.100826  |
| H 0 | 3.251814  | -2.544809 | 2.105027  |
| H 0 | 3.228039  | -0.385552 | 1.151519  |
| H 0 | 4.337698  | -1.096040 | -0.021131 |
| H 0 | 3.558557  | 0.531036  | -1.761329 |
| H 0 | 2.422067  | 1.231158  | -0.614965 |
| H 0 | 4.333830  | 1.906598  | 0.871729  |
| H 0 | 5.471839  | 1.203889  | -0.269889 |
| H 0 | 3.555183  | 3.515760  | -0.897114 |
| H 0 | 4.695641  | 2.815750  | -2.035969 |
| H 0 | 5.469747  | 4.233246  | 0.589867  |
| H 0 | 5.629968  | 4.913706  | -1.037504 |
| H 0 | 6.619268  | 3.525990  | -0.555536 |

Free Energy (PCM/B3LYP/6-31G\*) = -1757.657762  
Number of imaginary frequencies = 0

**2-3R-c11**

B3LYP/6-31G\* geometry

|     |           |           |           |
|-----|-----------|-----------|-----------|
| O 0 | 1.275954  | -0.929235 | -0.904540 |
| C 0 | 0.848018  | -3.239632 | -0.425648 |
| C 0 | 2.527705  | -2.063268 | 0.960079  |
| C 0 | 2.033722  | -3.449666 | 0.457148  |
| C 0 | 2.592207  | -1.084029 | -0.253981 |
| C 0 | 0.577357  | -2.052017 | -1.009933 |
| C 0 | -0.692324 | -2.095318 | -1.824322 |
| N 0 | -1.220243 | -3.409071 | -1.422137 |
| C 0 | -0.206053 | -4.183227 | -0.797360 |
| O 0 | -1.942154 | -4.061640 | -2.439611 |
| C 0 | -3.235060 | -4.452300 | -1.956651 |
| C 0 | -1.667557 | -0.935859 | -1.603434 |
| S 0 | -2.295799 | -0.910242 | 0.131718  |
| C 0 | -2.607066 | 0.881628  | 0.363300  |
| C 0 | -3.819897 | 1.397540  | -0.435697 |
| C 0 | -4.099501 | 2.848089  | -0.024935 |
| O 0 | -4.998945 | 0.646296  | -0.185317 |

|     |           |           |           |
|-----|-----------|-----------|-----------|
| O 0 | -3.351190 | 3.762912  | -0.293945 |
| O 0 | -5.218795 | 3.019684  | 0.690465  |
| O 0 | -0.278532 | -5.389045 | -0.607395 |
| O 0 | 3.148221  | -4.037956 | -0.244658 |
| O 0 | 3.850390  | -2.208336 | 1.466637  |
| C 0 | 1.647442  | -1.544387 | 2.096451  |
| C 0 | 3.087676  | 0.319316  | 0.063962  |
| C 0 | 3.395249  | 1.156992  | -1.185302 |
| C 0 | 3.902887  | 2.564618  | -0.848836 |
| C 0 | 4.226112  | 3.406698  | -2.089792 |
| C 0 | 4.729751  | 4.813349  | -1.750223 |
| H 0 | 1.777939  | -4.076001 | 1.320090  |
| H 0 | 3.239278  | -1.550224 | -1.007915 |
| H 0 | -0.440107 | -2.121483 | -2.894290 |
| H 0 | -3.730636 | -4.907934 | -2.817374 |
| H 0 | -3.807160 | -3.584423 | -1.611641 |
| H 0 | -3.142999 | -5.185004 | -1.149372 |
| H 0 | -2.501016 | -1.027530 | -2.303647 |
| H 0 | -1.147740 | 0.005890  | -1.802606 |
| H 0 | -1.717172 | 1.461801  | 0.106982  |
| H 0 | -2.794863 | 0.992823  | 1.436074  |
| H 0 | -3.581339 | 1.402522  | -1.506882 |
| H 0 | -4.735982 | -0.283032 | -0.039754 |
| H 0 | -5.647767 | 2.136300  | 0.755467  |
| H 0 | 3.012946  | -4.998005 | -0.279478 |
| H 0 | 4.248458  | -2.921923 | 0.930099  |
| H 0 | 1.594325  | -2.291733 | 2.894290  |
| H 0 | 0.631471  | -1.322827 | 1.756121  |
| H 0 | 2.076482  | -0.631062 | 2.518336  |
| H 0 | 2.342160  | 0.834180  | 0.682820  |
| H 0 | 3.991847  | 0.209761  | 0.673180  |
| H 0 | 4.147177  | 0.634086  | -1.794099 |
| H 0 | 2.492922  | 1.233069  | -1.806005 |
| H 0 | 3.149217  | 3.088050  | -0.241973 |
| H 0 | 4.801452  | 2.486630  | -0.218917 |
| H 0 | 3.328091  | 3.481164  | -2.719486 |
| H 0 | 4.980445  | 2.883767  | -2.694735 |
| H 0 | 3.982979  | 5.372378  | -1.172722 |
| H 0 | 4.949542  | 5.389045  | -2.656770 |
| H 0 | 5.647767  | 4.771201  | -1.150986 |

Free Energy (PCM/B3LYP/6-31G\*) = -1757.657666  
Number of imaginary frequencies = 0

**2-3R-c12**

B3LYP/6-31G\* geometry

|     |           |           |           |
|-----|-----------|-----------|-----------|
| O 0 | 1.512985  | -1.104441 | -0.474312 |
| C 0 | 1.541224  | -3.497518 | -0.537134 |
| C 0 | 3.523997  | -2.341791 | 0.392158  |
| C 0 | 2.997118  | -3.656328 | -0.249342 |
| C 0 | 2.987048  | -1.133857 | -0.436912 |
| C 0 | 0.937004  | -2.291320 | -0.627701 |
| C 0 | -0.549747 | -2.417705 | -0.869719 |
| N 0 | -0.716959 | -3.872013 | -0.689445 |
| C 0 | 0.531570  | -4.535754 | -0.737083 |
| O 0 | -1.737135 | -4.425205 | -1.486084 |
| C 0 | -2.642021 | -5.186543 | -0.674277 |
| C 0 | -1.457558 | -1.623651 | 0.083944  |
| S 0 | -1.622579 | 0.160818  | -0.336780 |
| C 0 | -3.022799 | 0.130247  | -1.528679 |
| C 0 | -4.421546 | 0.078686  | -0.894149 |
| C 0 | -4.654063 | 1.221359  | 0.089933  |
| O 0 | -4.651266 | -1.149675 | -0.234803 |
| O 0 | -5.000864 | 1.032156  | 1.240086  |
| O 0 | -4.454439 | 2.427523  | -0.451904 |
| O 0 | 0.671630  | -5.743458 | -0.880643 |
| O 0 | 3.777996  | -3.857007 | -1.445975 |
| O 0 | 4.945142  | -2.329175 | 0.304886  |
| C 0 | 3.149376  | -2.261301 | 1.871675  |
| C 0 | 3.435485  | 0.238325  | 0.045144  |
| C 0 | 3.127965  | 1.367471  | -0.948538 |
| C 0 | 3.586011  | 2.742331  | -0.446214 |
| C 0 | 3.304101  | 3.878358  | -1.437826 |
| C 0 | 3.760003  | 5.249749  | -0.928694 |
| H 0 | 3.173738  | -4.491152 | 0.439472  |
| H 0 | 3.305823  | -1.291414 | -1.475337 |
| H 0 | -0.783785 | -2.160118 | -1.911471 |
| H 0 | -2.130380 | -6.038812 | -0.217343 |



H O -3.409836 -5.541463 -1.366119  
H O -3.098504 -4.563159 0.101941  
H O -1.075871 -1.676206 1.107187  
H O -2.460878 -2.049700 0.071702  
H O -2.908749 -0.722982 -2.203144  
H O -2.927437 1.040605 -2.126062  
H O -5.151491 0.203817 -1.710520  
H O -4.912941 -0.919772 0.677899  
H O -4.627090 3.102303 0.233820  
H O 3.719226 -4.793916 -1.691141  
H O 5.151491 -2.823564 -0.512744  
H O 3.498621 -3.158525 2.391910  
H O 2.068486 -2.173274 2.013796  
H O 3.628167 -1.393977 2.334844  
H O 2.961175 0.453468 1.010915  
H O 4.515348 0.180406 0.221910  
H O 3.619413 1.147076 -1.907437  
H O 2.049357 1.392851 -1.151893  
H O 3.088858 2.964370 0.509737  
H O 4.664137 2.710121 -0.229109  
H O 2.227281 3.908231 -1.656746  
H O 3.803443 3.657384 -2.391910  
H O 3.250435 5.514004 0.006279  
H O 3.546883 6.038812 -1.659115  
H O 4.839262 5.259923 -0.731643  
Free Energy (PCM/B3LYP/6-31G\*) ==-1757.657642  
Number of imaginary frequencies = 0

### 2-3R-c13

B3LYP/6-31G\* geometry  
O O 1.990636 -1.126372 -0.396419  
C O 1.920398 -3.517306 -0.549085  
C O 4.005495 -2.471394 0.280618  
C O 3.385662 -3.740344 -0.371461  
C O 3.462616 -1.210103 -0.462139  
C O 1.364605 -2.286510 -0.554322  
C O -0.137692 -2.338009 -0.708848  
N O -0.364064 -3.789353 -0.588015  
C O 0.853832 -4.499273 -0.739174  
O O -1.435729 -4.262237 -1.374645  
C O -2.289630 -5.107201 -0.589564  
C O -0.865114 -1.484359 0.331893  
S O -2.684174 -1.459519 0.030782  
C O -3.183192 -0.068366 1.122582  
C O -3.037703 1.331858 0.505262  
C O -3.818277 1.471809 -0.798518  
O O -1.685904 1.665410 0.268293  
O O -3.294819 1.822788 -1.838613  
O O -5.117560 1.184628 -0.664563  
O O 0.930949 -5.702050 -0.952698  
O O 4.072208 -3.918912 -1.627605  
O O 5.416543 -2.507351 0.094372  
C O 3.736808 -2.436904 1.784820  
C O 3.996444 0.122552 0.042691  
C O 3.645558 1.309113 -0.866084  
C O 4.192540 2.641820 -0.339592  
C O 3.851531 3.837896 -1.237582  
C O 4.395384 5.166925 -0.703048  
H O 3.578672 -4.607509 0.271343  
H O 3.703731 -1.334581 -1.525649  
H O -0.418273 -2.013806 -1.720643  
H O -3.101548 -5.388799 -1.264770  
H O -2.691235 -4.564549 0.271989  
H O -1.751024 -6.000956 -0.262082  
H O -0.504253 -0.456680 0.266017  
H O -0.666751 -1.874803 1.334769  
H O -2.599723 -0.113015 2.046489  
H O -4.230720 -0.244664 1.380391  
H O -3.474625 2.046960 1.220874  
H O -1.625601 1.877375 -0.683441  
H O -5.546533 1.298391 -1.535393  
H O 3.968420 -4.844357 -1.899795  
H O 5.546533 -2.974994 -0.754186  
H O 4.078362 -3.369653 2.244064  
H O 2.673637 -2.307047 2.006432  
H O 4.286696 -1.611981 2.246249  
H O 3.612842 0.304870 1.054269

H O 5.084644 0.022209 0.123939  
H O 4.044165 1.123179 -1.874020  
H O 2.555054 1.378536 -0.972117  
H O 3.796486 2.823335 0.670605  
H O 5.284988 2.569773 -0.230578  
H O 2.760020 3.906784 -1.348273  
H O 4.249810 3.658214 -2.246249  
H O 3.987739 5.389740 0.290856  
H O 4.135252 6.000956 -1.365043  
H O 5.488588 5.139930 -0.613913  
Free Energy (PCM/B3LYP/6-31G\*) ==-1757.657470  
Number of imaginary frequencies = 0

### 2-3R-c14

B3LYP/6-31G\* geometry  
O O -1.445548 -0.278784 1.429674  
C O -1.961056 -1.910872 -0.243118  
C O -3.701622 -0.282244 0.339532  
C O -3.219670 -1.284730 -0.746707  
C O -2.522836 0.569178 0.878427  
C O -1.235295 -1.413826 0.779586  
C O -0.101658 -2.337653 1.160073  
N O -0.188290 -3.332903 0.070434  
C O -1.430419 -3.217984 -0.589102  
O O 0.177179 -4.634099 0.459131  
C O 1.224220 -5.126341 -0.390114  
C O 1.278219 -1.696206 1.314054  
S O 1.875792 -0.999331 -0.284735  
C O 3.081740 0.259553 0.291079  
C O 4.437353 -0.296021 0.751057  
C O 5.104979 -1.156617 -0.317445  
O O 4.305647 -1.050980 1.936203  
O O 5.467708 -2.297709 -0.103596  
O O 5.262564 -0.518333 -1.482013  
O O -1.939403 -4.080381 -1.305283  
O O -4.252710 -2.265692 -0.912000  
O O -4.161681 -1.040474 1.460474  
C O -4.843805 0.599598 -0.181617  
C O -1.897162 1.562634 -0.103161  
C O -0.850473 2.483844 0.540772  
C O -0.281670 3.510775 -0.446013  
C O 0.768522 4.437824 0.180115  
C O 1.327824 5.467972 -0.806444  
H O -3.062144 -0.758342 -1.699013  
H O -2.890927 1.095508 1.763351  
H O -0.347502 -2.838752 2.107314  
H O 0.876188 -5.217421 -1.423731  
H O 1.467240 -6.114317 0.008201  
H O 2.105164 -4.477215 -0.347799  
H O 1.987627 -2.436583 1.686443  
H O 1.213993 -0.888865 2.049003  
H O 2.641926 0.839896 1.107683  
H O 3.231266 0.931976 -0.558018  
H O 5.099631 0.567674 0.927561  
H O 4.729061 -1.912136 1.754384  
H O 5.700090 -1.128877 -2.107314  
H O -3.809645 -3.080152 -1.223507  
H O -4.588492 -1.825152 1.065182  
H O -5.700090 -0.039597 -0.417707  
H O -4.571527 1.147442 -1.088599  
H O -5.153426 1.316891 0.585568  
H O -1.445557 1.015878 -0.941547  
H O -2.700421 2.177608 -0.524174  
H O -1.307945 3.009837 1.391299  
H O -0.032928 1.879404 0.952319  
H O 0.164389 2.984479 -1.302788  
H O -1.103601 4.117405 -0.854209  
H O 1.592094 3.831048 0.582636  
H O 0.324223 4.958480 1.040318  
H O 1.809661 4.977151 -1.661165  
H O 2.073386 6.114317 -0.329127  
H O 0.531093 6.111271 -1.200108  
Free Energy (PCM/B3LYP/6-31G\*) ==-1757.657400  
Number of imaginary frequencies = 0

### 2-3R-c15

B3LYP/6-31G\* geometry

|     |           |           |           |
|-----|-----------|-----------|-----------|
| O 0 | -0.611374 | -0.719865 | -0.816148 |
| C 0 | -2.840023 | -1.365055 | -0.219922 |
| C 0 | -0.964097 | -2.335130 | 1.080915  |
| C 0 | -2.458586 | -2.493876 | 0.680623  |
| C 0 | -0.141332 | -1.985598 | -0.198035 |
| C 0 | -1.944414 | -0.601798 | -0.876232 |
| C 0 | -2.609227 | 0.449883  | -1.733403 |
| N 0 | -3.999376 | 0.322872  | -1.261582 |
| C 0 | -4.185123 | -0.896941 | -0.570903 |
| O 0 | -4.959169 | 0.626031  | -2.242993 |
| C 0 | -5.885986 | 1.602146  | -1.744559 |
| C 0 | -2.065604 | 1.877376  | -1.656463 |
| S 0 | -2.099917 | 2.560327  | 0.061118  |
| C 0 | -0.481130 | 3.424267  | 0.151774  |
| C 0 | 0.712057  | 2.499272  | 0.412121  |
| C 0 | 1.979557  | 3.321848  | 0.699731  |
| O 0 | 1.003809  | 1.648222  | -0.694600 |
| O 0 | 2.000906  | 4.258104  | 1.469973  |
| O 0 | 3.071701  | 2.906022  | 0.046507  |
| O 0 | -5.271305 | -1.396875 | -0.316702 |
| O 0 | -2.565740 | -3.769852 | -0.019246 |
| O 0 | -0.487323 | -3.583925 | 1.566985  |
| C 0 | -0.801538 | -1.305929 | 2.198582  |
| C 0 | 1.360025  | -1.848730 | 0.005631  |
| C 0 | 2.163110  | -1.795608 | -1.302480 |
| C 0 | 3.670624  | -1.645878 | -1.062995 |
| C 0 | 4.492888  | -1.620914 | -2.357733 |
| C 0 | 5.997051  | -1.462017 | -2.113213 |
| H 0 | -3.075844 | -2.501479 | 1.586423  |
| H 0 | -0.352522 | -2.762149 | -0.943011 |
| H 0 | -2.562897 | 0.132716  | -2.786227 |
| H 0 | -5.369241 | 2.519857  | -1.444408 |
| H 0 | -6.456293 | 1.200151  | -0.902010 |
| H 0 | -6.555660 | 1.806931  | -2.583219 |
| H 0 | -2.669561 | 2.512926  | -2.309160 |
| H 0 | -1.036979 | 1.897857  | -2.019774 |
| H 0 | -0.571778 | 4.127229  | 0.983424  |
| H 0 | -0.322911 | 4.001722  | -0.763890 |
| H 0 | 0.516583  | 1.905184  | 1.314587  |
| H 0 | 0.491235  | 0.819457  | -0.621581 |
| H 0 | 2.784767  | 2.154313  | -0.520728 |
| H 0 | -3.486380 | -4.069271 | -0.084132 |
| H 0 | -1.002219 | -4.258104 | 1.080617  |
| H 0 | -1.415695 | -1.596937 | 3.056187  |
| H 0 | -1.104704 | -0.304727 | 1.877998  |
| H 0 | 0.240348  | -1.264360 | 2.528530  |
| H 0 | 1.569062  | -0.956019 | 0.608710  |
| H 0 | 1.677069  | -2.711719 | 0.601110  |
| H 0 | 1.971852  | -2.711934 | -1.878793 |
| H 0 | 1.811329  | -0.961456 | -1.924050 |
| H 0 | 3.857320  | -0.721300 | -0.496637 |
| H 0 | 4.021655  | -2.470613 | -0.425285 |
| H 0 | 4.137048  | -0.800157 | -2.996645 |
| H 0 | 4.308995  | -2.547287 | -2.920099 |
| H 0 | 6.215437  | -0.526218 | -1.583928 |
| H 0 | 6.555660  | -1.450027 | -3.056187 |
| H 0 | 6.388205  | -2.286164 | -1.503789 |

Free Energy (PCM/B3LYP/6-31G\*) = -1757.657345  
Number of imaginary frequencies = 0

**2-3R-c16**

B3LYP/6-31G\* geometry

|     |           |           |           |
|-----|-----------|-----------|-----------|
| O 0 | 2.076304  | -1.002989 | -0.780908 |
| C 0 | 1.859745  | -3.363553 | -0.427978 |
| C 0 | 3.657351  | -2.170098 | 0.787906  |
| C 0 | 3.168609  | -3.551294 | 0.265171  |
| C 0 | 3.482591  | -1.114014 | -0.348218 |
| C 0 | 1.437771  | -2.163201 | -0.880108 |
| C 0 | 0.062510  | -2.237254 | -1.501784 |
| N 0 | -0.305569 | -3.622787 | -1.160282 |
| O 0 | 0.833743  | -4.356116 | -0.745015 |
| O 0 | -1.105221 | -4.255091 | -2.134799 |
| C 0 | -2.237499 | -4.881443 | -1.513725 |
| C 0 | -0.888259 | -1.171173 | -0.951299 |
| S 0 | -2.489639 | -1.177404 | -1.861985 |
| C 0 | -3.242324 | 0.381162  | -1.259023 |
| C 0 | -3.899478 | 0.271368  | 0.132262  |

|     |           |           |           |
|-----|-----------|-----------|-----------|
| C 0 | -4.565580 | 1.600656  | 0.484261  |
| O 0 | -2.977188 | -0.060016 | 1.148521  |
| O 0 | -4.141041 | 2.335053  | 1.355555  |
| O 0 | -5.627341 | 1.872792  | -0.284144 |
| O 0 | 0.878278  | -5.576422 | -0.659331 |
| O 0 | 4.199296  | -4.029296 | -0.623159 |
| O 0 | 5.047077  | -2.261177 | 1.083367  |
| C 0 | 2.933461  | -1.781612 | 2.076781  |
| C 0 | 3.943040  | 0.295416  | -0.005763 |
| C 0 | 3.995726  | 1.235144  | -1.218775 |
| C 0 | 4.457843  | 2.651486  | -0.854607 |
| C 0 | 4.513858  | 3.602218  | -2.057247 |
| C 0 | 4.970971  | 5.016903  | -1.686843 |
| H 0 | 3.072111  | -4.242449 | 1.111037  |
| H 0 | 4.031524  | -1.488516 | -1.221785 |
| H 0 | 0.142710  | -2.145380 | -2.594080 |
| H 0 | -2.850786 | -4.144434 | -0.985904 |
| H 0 | -1.913607 | -5.670879 | -0.829635 |
| H 0 | -2.804844 | -5.315873 | -2.340667 |
| H 0 | -0.425366 | -0.188761 | -1.086724 |
| H 0 | -1.068504 | -1.332045 | 0.112377  |
| H 0 | -4.000691 | 0.643791  | -2.002389 |
| H 0 | -2.481861 | 1.169622  | -1.255664 |
| H 0 | -4.671224 | -0.506044 | 0.096273  |
| H 0 | -2.761165 | 0.778128  | 1.599835  |
| H 0 | -5.975654 | 2.748409  | -0.023977 |
| H 0 | 4.092557  | -4.988764 | -0.720719 |
| H 0 | 5.397865  | -2.916687 | 0.448762  |
| H 0 | 3.039090  | -2.581096 | 2.816577  |
| H 0 | 1.867912  | -1.601457 | 1.907699  |
| H 0 | 3.372789  | -0.872415 | 2.496746  |
| H 0 | 3.278778  | 0.715839  | 0.759581  |
| H 0 | 4.938386  | 0.208671  | 0.444256  |
| H 0 | 4.673954  | 0.812681  | -1.974429 |
| H 0 | 3.003516  | 1.284091  | -1.686156 |
| H 0 | 3.782110  | 3.070074  | -0.093969 |
| H 0 | 5.451678  | 2.601459  | -0.385253 |
| H 0 | 3.521006  | 3.649402  | -2.526865 |
| H 0 | 5.190859  | 3.185675  | -2.816577 |
| H 0 | 4.293320  | 5.472654  | -0.954166 |
| H 0 | 5.000078  | 5.670879  | -2.566074 |
| H 0 | 5.975654  | 5.005672  | -1.246126 |

Free Energy (PCM/B3LYP/6-31G\*) = -1757.657327  
Number of imaginary frequencies = 0

**2-3R-c17**

B3LYP/6-31G\* geometry

|     |           |           |           |
|-----|-----------|-----------|-----------|
| O 0 | 1.334487  | -0.605585 | -1.279289 |
| C 0 | 2.282210  | -2.318075 | 0.091708  |
| C 0 | 3.820715  | -0.909028 | -1.203517 |
| C 0 | 3.703596  | -1.868164 | 0.013096  |
| C 0 | 2.636725  | 0.090924  | -1.241862 |
| C 0 | 1.264229  | -1.716165 | -0.559311 |
| C 0 | -0.040602 | -2.457212 | -0.359181 |
| N 0 | 0.383139  | -3.483860 | 0.619502  |
| C 0 | 1.788405  | -3.547993 | 0.683421  |
| O 0 | -0.278899 | -4.716306 | 0.463888  |
| C 0 | -0.859515 | -5.128374 | 1.709429  |
| C 0 | -1.209494 | -1.619331 | 0.183386  |
| S 0 | -2.049065 | -0.579253 | -1.082467 |
| C 0 | -3.330531 | -1.734541 | -1.719018 |
| C 0 | -4.594944 | -1.852519 | -0.853110 |
| C 0 | -5.252709 | -0.499390 | -0.599078 |
| O 0 | -4.324020 | -2.471394 | 0.387985  |
| O 0 | -5.487730 | -0.087830 | 0.520897  |
| O 0 | -5.549557 | 0.157458  | -1.725337 |
| O 0 | 2.440816  | -4.482068 | 1.151929  |
| O 0 | 4.582350  | -2.975715 | -0.228461 |
| O 0 | 3.690900  | -1.693053 | -2.391732 |
| C 0 | 5.173153  | -0.184876 | -1.215863 |
| C 0 | 2.587880  | 1.135007  | -0.122545 |
| C 0 | 1.477564  | 2.178464  | -0.311464 |
| C 0 | 1.456722  | 3.235033  | 0.800770  |
| C 0 | 0.353266  | 4.284201  | 0.615514  |
| C 0 | 0.323766  | 5.332355  | 1.732777  |
| H 0 | 4.016944  | -1.348930 | 0.930228  |
| H 0 | 2.671616  | 0.586297  | -2.216045 |

|     |           |           |           |
|-----|-----------|-----------|-----------|
| H 0 | -0.337042 | -2.964144 | -1.286198 |
| H 0 | -0.084341 | -5.300809 | 2.462225  |
| H 0 | -1.371506 | -6.066663 | 1.482795  |
| H 0 | -1.579772 | -4.389044 | 2.075286  |
| H 0 | -0.860133 | -0.946253 | 0.971078  |
| H 0 | -1.965222 | -2.278883 | 0.610241  |
| H 0 | -2.894528 | -2.729482 | -1.845988 |
| H 0 | -3.601299 | -1.361704 | -2.710224 |
| H 0 | -5.318436 | -2.460761 | -1.419867 |
| H 0 | -4.641353 | -1.850831 | 1.072599  |
| H 0 | -5.968706 | 1.006409  | -1.482613 |
| H 0 | 4.208162  | -3.733839 | 0.263744  |
| H 0 | 4.135922  | -2.535761 | -2.177034 |
| H 0 | 5.968706  | -0.929699 | -1.315636 |
| H 0 | 5.354091  | 0.382135  | -0.297733 |
| H 0 | 5.233397  | 0.497256  | -2.070296 |
| H 0 | 2.465677  | 0.631180  | 0.845631  |
| H 0 | 3.556027  | 1.647124  | -0.089409 |
| H 0 | 1.612973  | 2.674288  | -1.283634 |
| H 0 | 0.503380  | 1.675899  | -0.353284 |
| H 0 | 1.324204  | 2.737901  | 1.773178  |
| H 0 | 2.433273  | 3.739623  | 0.846079  |
| H 0 | -0.620848 | 3.777668  | 0.562536  |
| H 0 | 0.489950  | 4.784940  | -0.353441 |
| H 0 | 0.153254  | 4.864122  | 2.710224  |
| H 0 | -0.473857 | 6.066663  | 1.571252  |
| H 0 | 1.273652  | 5.878590  | 1.788855  |

Free Energy (PCM/B3LYP/6-31G\*) = -1757.657325  
Number of imaginary frequencies = 0

**2-3R-c18**

B3LYP/6-31G\* geometry

|     |           |           |           |
|-----|-----------|-----------|-----------|
| O 0 | 1.716055  | -1.011851 | -1.386254 |
| C 0 | 1.160724  | -2.684850 | 0.231116  |
| C 0 | 3.154570  | -3.046804 | -1.155827 |
| C 0 | 2.438347  | -3.455954 | 0.162569  |
| C 0 | 3.106887  | -1.511743 | -1.364249 |
| C 0 | 0.889483  | -1.613960 | -0.543864 |
| C 0 | -0.525647 | -1.117997 | -0.346878 |
| N 0 | -0.957994 | -1.980693 | 0.776566  |
| C 0 | -0.053667 | -3.057872 | 0.929916  |
| O 0 | -2.317985 | -2.368558 | 0.722833  |
| C 0 | -2.941772 | -2.170131 | 2.003939  |
| C 0 | -0.588819 | 0.386388  | -0.056179 |
| S 0 | -2.254122 | 1.105930  | 0.225291  |
| C 0 | -3.005950 | 1.102624  | -1.458089 |
| C 0 | -3.991214 | -0.054241 | -1.735254 |
| C 0 | -5.177673 | -0.022399 | -0.771315 |
| O 0 | -3.391419 | -1.325463 | -1.735877 |
| O 0 | -5.435695 | -0.900006 | 0.025349  |
| O 0 | -5.898475 | 1.106045  | -0.902239 |
| O 0 | -0.291799 | -4.099612 | 1.540906  |
| O 0 | 2.186690  | -4.865711 | 0.091374  |
| O 0 | 2.412854  | -3.598375 | -2.245607 |
| C 0 | 4.593640  | -3.577346 | -1.197434 |
| C 0 | 3.907124  | -0.667524 | -0.369242 |
| C 0 | 3.912649  | 0.832357  | -0.698540 |
| C 0 | 4.742953  | 1.650839  | 0.298336  |
| C 0 | 4.755274  | 3.153420  | -0.010527 |
| C 0 | 5.578852  | 3.967248  | 0.992973  |
| H 0 | 3.088287  | -3.245372 | 1.023746  |
| H 0 | 3.447601  | -1.316687 | -2.384572 |
| H 0 | -1.130938 | -1.353739 | -1.230373 |
| H 0 | -2.493245 | -2.836571 | 2.744895  |
| H 0 | -3.990685 | -2.424699 | 1.844105  |
| H 0 | -2.852545 | -1.126074 | 2.315066  |
| H 0 | -0.106434 | 0.927058  | -0.875950 |
| H 0 | -0.036659 | 0.606306  | 0.862448  |
| H 0 | -2.203341 | 1.069957  | -2.200008 |
| H 0 | -3.526989 | 2.057361  | -1.568611 |
| H 0 | -4.388699 | 0.110374  | -2.744895 |
| H 0 | -3.283846 | -1.623602 | -0.808340 |
| H 0 | -6.624886 | 1.073204  | -0.249395 |
| H 0 | 1.405790  | -5.034878 | 0.655103  |
| H 0 | 2.101601  | -4.463722 | -1.916173 |
| H 0 | 4.564820  | -4.671123 | -1.178190 |
| H 0 | 5.190289  | -3.239852 | -0.344707 |

|     |          |           |           |
|-----|----------|-----------|-----------|
| H 0 | 5.089488 | -3.263958 | -2.122006 |
| H 0 | 3.515449 | -0.822915 | 0.644892  |
| H 0 | 4.939427 | -1.035217 | -0.365414 |
| H 0 | 4.310739 | 0.977459  | -1.713295 |
| H 0 | 2.882848 | 1.209960  | -0.712233 |
| H 0 | 4.349650 | 1.493710  | 1.313718  |
| H 0 | 5.776546 | 1.274309  | 0.309705  |
| H 0 | 3.721762 | 3.527506  | -0.025373 |
| H 0 | 5.151678 | 3.311379  | -1.023569 |
| H 0 | 5.183546 | 3.857550  | 2.010517  |
| H 0 | 5.569694 | 5.034878  | 0.744959  |
| H 0 | 6.624886 | 3.636716  | 1.006831  |

Free Energy (PCM/B3LYP/6-31G\*) = -1757.657308  
Number of imaginary frequencies = 0

**2-3R-c19**

B3LYP/6-31G\* geometry

|     |           |           |           |
|-----|-----------|-----------|-----------|
| O 0 | 1.267522  | -0.932281 | -0.912224 |
| C 0 | 0.832168  | -3.191500 | -0.238381 |
| C 0 | 2.290725  | -1.810987 | 1.211269  |
| C 0 | 1.888202  | -3.260624 | 0.814621  |
| C 0 | 2.492739  | -0.973647 | -0.091156 |
| C 0 | 0.615392  | -2.085953 | -0.983545 |
| C 0 | -0.522769 | -2.270185 | -1.957247 |
| N 0 | -1.063812 | -3.556085 | -1.487649 |
| C 0 | -0.129160 | -4.215336 | -0.648828 |
| O 0 | -1.627022 | -4.341584 | -2.510028 |
| C 0 | -2.968666 | -4.713706 | -2.164217 |
| C 0 | -1.544747 | -1.132790 | -2.013606 |
| S 0 | -2.428165 | -0.926820 | -0.411428 |
| C 0 | -3.044267 | 0.787873  | -0.667658 |
| C 0 | -4.158102 | 1.095007  | 0.349895  |
| C 0 | -4.616132 | 2.541700  | 0.172386  |
| O 0 | -3.745341 | 0.899872  | 1.685052  |
| O 0 | -4.370050 | 3.410578  | 0.985590  |
| O 0 | -5.277432 | 2.741779  | -0.974338 |
| O 0 | -0.189319 | -5.398015 | -0.341524 |
| O 0 | 3.095261  | -3.895663 | 0.343589  |
| O 0 | 3.539995  | -1.856794 | 1.892937  |
| C 0 | 1.263799  | -1.195886 | 2.161523  |
| C 0 | 2.922666  | 0.470275  | 0.123277  |
| C 0 | 3.343832  | 1.184443  | -1.168628 |
| C 0 | 3.788773  | 2.632692  | -0.928986 |
| C 0 | 4.204936  | 3.361811  | -2.212708 |
| C 0 | 4.646219  | 4.808690  | -1.968735 |
| H 0 | 1.526003  | -3.790013 | 1.703955  |
| H 0 | 3.237389  | -1.502115 | -0.700321 |
| H 0 | -0.114471 | -2.403369 | -2.969797 |
| H 0 | -3.336344 | -5.274854 | -3.026824 |
| H 0 | -3.592862 | -3.829550 | -1.997573 |
| H 0 | -2.977421 | -5.350893 | -1.274652 |
| H 0 | -2.265386 | -1.329168 | -2.812342 |
| H 0 | -1.014739 | -0.204761 | -2.248668 |
| H 0 | -3.443067 | 0.876694  | -1.682345 |
| H 0 | -2.218380 | 1.497368  | -0.547916 |
| H 0 | -5.008527 | 0.431007  | 0.157794  |
| H 0 | -3.458719 | 1.773385  | 2.011894  |
| H 0 | -5.506165 | 3.690475  | -1.032085 |
| H 0 | 2.976606  | -4.856374 | 0.408845  |
| H 0 | 4.011510  | -2.618723 | 1.502007  |
| H 0 | 1.123116  | -1.851028 | 3.026824  |
| H 0 | 0.295785  | -1.046229 | 1.674385  |
| H 0 | 1.619564  | -0.227963 | 2.525862  |
| H 0 | 2.105190  | 1.023449  | 0.602408  |
| H 0 | 3.758578  | 0.453925  | 0.831572  |
| H 0 | 4.163785  | 0.624293  | -1.641403 |
| H 0 | 2.509210  | 1.172224  | -1.881655 |
| H 0 | 2.971751  | 3.188876  | -0.445616 |
| H 0 | 4.627529  | 2.643213  | -0.217139 |
| H 0 | 3.365855  | 3.349611  | -2.922838 |
| H 0 | 5.021386  | 2.806392  | -2.695865 |
| H 0 | 3.838205  | 5.398015  | -1.517540 |
| H 0 | 4.936182  | 5.301420  | -2.903979 |
| H 0 | 5.506165  | 4.851280  | -1.288759 |

Free Energy (PCM/B3LYP/6-31G\*) = -1757.657282  
Number of imaginary frequencies = 0

**2-3R-c20**

B3LYP/6-31G\* geometry

|   |   |           |           |           |
|---|---|-----------|-----------|-----------|
| O | 0 | 2.041114  | -1.130560 | -0.365064 |
| C | 0 | 1.925290  | -3.522177 | -0.457626 |
| C | 0 | 4.019483  | -2.495013 | 0.375024  |
| C | 0 | 3.382311  | -3.769998 | -0.247933 |
| C | 0 | 3.511646  | -1.246594 | -0.412204 |
| C | 0 | 1.393011  | -2.281973 | -0.503149 |
| C | 0 | -0.110209 | -2.308502 | -0.661855 |
| N | 0 | -0.365930 | -3.755741 | -0.553616 |
| C | 0 | 0.845789  | -4.487120 | -0.654778 |
| O | 0 | -1.398398 | -4.220192 | -1.394964 |
| C | 0 | -2.334599 | -5.004893 | -0.644432 |
| C | 0 | -0.810553 | -1.452563 | 0.406292  |
| S | 0 | -2.634903 | -1.337771 | 0.279420  |
| C | 0 | -2.811939 | -0.287727 | -1.226104 |
| C | 0 | -4.051436 | 0.603450  | -1.107495 |
| C | 0 | -3.951974 | 1.606480  | 0.040186  |
| O | 0 | -5.208742 | -0.186600 | -0.929150 |
| O | 0 | -4.824068 | 1.724702  | 0.879540  |
| O | 0 | -2.841511 | 2.350504  | -0.006439 |
| O | 0 | 0.908156  | -5.694171 | -0.847592 |
| O | 0 | 4.085299  | -4.003043 | -1.485723 |
| O | 0 | 5.431842  | -2.565089 | 0.209778  |
| C | 0 | 3.731282  | -2.408888 | 1.873555  |
| C | 0 | 4.067336  | 0.090750  | 0.055684  |
| C | 0 | 3.768935  | 1.247729  | -0.908405 |
| C | 0 | 4.328591  | 2.589636  | -0.420132 |
| C | 0 | 4.055509  | 3.749986  | -1.385792 |
| C | 0 | 4.607587  | 5.090348  | -0.889383 |
| H | 0 | 3.545479  | -4.620541 | 0.424744  |
| H | 0 | 3.761294  | -1.409750 | -1.468530 |
| H | 0 | -0.387614 | -1.968301 | -1.667807 |
| H | 0 | -1.851211 | -5.897196 | -0.235754 |
| H | 0 | -3.098785 | -5.296829 | -1.369489 |
| H | 0 | -2.787344 | -4.412675 | 0.156644  |
| H | 0 | -0.388691 | -0.443100 | 0.387999  |
| H | 0 | -0.616611 | -1.881112 | 1.394054  |
| H | 0 | -2.915612 | -0.919239 | -2.112138 |
| H | 0 | -1.919430 | 0.333279  | -1.339182 |
| H | 0 | -4.128040 | 1.191541  | -2.036935 |
| H | 0 | -5.694555 | 0.216239  | -0.183699 |
| H | 0 | -2.862674 | 2.975691  | 0.744464  |
| H | 0 | 3.954929  | -4.931195 | -1.736545 |
| H | 0 | 5.564074  | -3.063935 | -0.620424 |
| H | 0 | 4.049416  | -3.332688 | 2.366416  |
| H | 0 | 2.667765  | -2.253059 | 2.075773  |
| H | 0 | 4.289848  | -1.579705 | 2.316650  |
| H | 0 | 3.663447  | 0.320690  | 1.049588  |
| H | 0 | 5.150443  | -0.031866 | 0.168073  |
| H | 0 | 4.193323  | 1.012726  | -1.895350 |
| H | 0 | 2.683792  | 1.334942  | -1.050831 |
| H | 0 | 3.896869  | 2.827336  | 0.563393  |
| H | 0 | 5.413513  | 2.496646  | -0.262824 |
| H | 0 | 2.971807  | 3.837712  | -1.548149 |
| H | 0 | 4.492809  | 3.514412  | -2.366416 |
| H | 0 | 4.160794  | 5.370281  | 0.072701  |
| H | 0 | 4.398902  | 5.897196  | -1.601416 |
| H | 0 | 5.694555  | 5.042678  | -0.748188 |

Free Energy (PCM/B3LYP/6-31G\*) = -1757.657230  
Number of imaginary frequencies = 0

**2-3R-c21**

B3LYP/6-31G\* geometry

|   |   |           |           |           |
|---|---|-----------|-----------|-----------|
| O | 0 | -0.871272 | -1.482272 | -0.939029 |
| C | 0 | -3.189188 | -1.681852 | -0.363695 |
| C | 0 | -1.546239 | -2.947301 | 0.989524  |
| C | 0 | -3.034234 | -2.856541 | 0.544190  |
| C | 0 | -0.635521 | -2.772534 | -0.266791 |
| C | 0 | -2.143579 | -1.114031 | -1.003853 |
| C | 0 | -2.561573 | 0.073261  | -1.836618 |
| N | 0 | -3.955234 | 0.229481  | -1.386591 |
| C | 0 | -4.398843 | -0.936983 | -0.713431 |
| O | 0 | -4.818468 | 0.727308  | -2.379966 |
| C | 0 | -5.507038 | 1.889973  | -1.898835 |
| C | 0 | -1.702359 | 1.330790  | -1.699518 |

|   |   |           |           |           |
|---|---|-----------|-----------|-----------|
| S | 0 | -1.746227 | 2.008706  | 0.015777  |
| C | 0 | -0.276464 | 3.107424  | -0.009446 |
| C | 0 | 1.070995  | 2.389649  | 0.211915  |
| C | 0 | 2.188842  | 3.425837  | 0.323100  |
| O | 0 | 1.391913  | 1.487960  | -0.827978 |
| O | 0 | 3.051421  | 3.550312  | -0.525224 |
| O | 0 | 2.094571  | 4.181890  | 1.423048  |
| O | 0 | -5.571164 | -1.193598 | -0.473905 |
| O | 0 | -3.329514 | -4.106804 | -0.113513 |
| O | 0 | -1.309020 | -4.247702 | 1.518754  |
| C | 0 | -1.238700 | -1.932232 | 2.089905  |
| C | 0 | 0.861422  | -2.855794 | -0.003316 |
| C | 0 | 1.710100  | -2.880105 | -1.282278 |
| C | 0 | 3.211505  | -3.010692 | -0.996506 |
| C | 0 | 4.072611  | -3.028331 | -2.265880 |
| C | 0 | 5.571779  | -3.156998 | -1.976561 |
| H | 0 | -3.670509 | -2.757325 | 1.431718  |
| H | 0 | -0.933877 | -3.541871 | -0.990699 |
| H | 0 | -2.561775 | -0.213644 | -2.898625 |
| H | 0 | -6.158330 | 1.634939  | -1.057246 |
| H | 0 | -6.109448 | 2.230678  | -2.744578 |
| H | 0 | -4.800731 | 2.672512  | -1.602088 |
| H | 0 | -2.063866 | 2.090681  | -2.398361 |
| H | 0 | -0.666634 | 1.087093  | -1.941256 |
| H | 0 | -0.442981 | 3.824731  | 0.799180  |
| H | 0 | -0.257524 | 3.661499  | -0.953744 |
| H | 0 | 1.021009  | 1.832776  | 1.154896  |
| H | 0 | 2.059226  | 1.940894  | -1.378571 |
| H | 0 | 2.821941  | 4.834756  | 1.407394  |
| H | 0 | -4.290943 | -4.235776 | -0.101078 |
| H | 0 | -1.912072 | -4.834756 | 1.021482  |
| H | 0 | -1.955491 | -2.044357 | 2.909352  |
| H | 0 | -1.286639 | -0.904058 | 1.719104  |
| H | 0 | -0.236758 | -2.106796 | 2.491987  |
| H | 0 | 1.166240  | -2.008273 | 0.623050  |
| H | 0 | 1.034120  | -3.767070 | 0.580274  |
| H | 0 | 1.385854  | -3.716519 | -1.918601 |
| H | 0 | 1.527338  | -1.962838 | -1.856539 |
| H | 0 | 3.532560  | -2.178125 | -0.353002 |
| H | 0 | 3.394444  | -3.930031 | -0.420570 |
| H | 0 | 3.887755  | -2.109345 | -2.840023 |
| H | 0 | 3.751557  | -3.859857 | -2.909352 |
| H | 0 | 5.929922  | -2.320479 | -1.363642 |
| H | 0 | 6.158330  | -3.167078 | -2.902524 |
| H | 0 | 5.791589  | -4.083866 | -1.432235 |

Free Energy (PCM/B3LYP/6-31G\*) = -1757.657198  
Number of imaginary frequencies = 0

**2-3R-c22**

B3LYP/6-31G\* geometry

|   |   |           |           |           |
|---|---|-----------|-----------|-----------|
| O | 0 | 1.866272  | -0.799462 | -0.564301 |
| C | 0 | 2.513117  | -3.102815 | -0.419973 |
| C | 0 | 4.024534  | -1.412559 | 0.576477  |
| C | 0 | 3.922206  | -2.856420 | 0.006704  |
| C | 0 | 3.287342  | -0.435906 | -0.393451 |
| C | 0 | 1.640211  | -2.103298 | -0.668597 |
| C | 0 | 0.273523  | -2.622269 | -1.052110 |
| N | 0 | 0.451232  | -4.060113 | -0.788283 |
| C | 0 | 1.829091  | -4.373767 | -0.652048 |
| O | 0 | -0.264702 | -4.888071 | -1.679250 |
| C | 0 | -0.979586 | -5.897507 | -0.950927 |
| C | 0 | -0.852676 | -1.961421 | -0.250749 |
| S | 0 | -2.501623 | -2.527544 | -0.843851 |
| C | 0 | -3.608813 | -1.478752 | 0.173085  |
| C | 0 | -3.635248 | -0.002090 | -0.269665 |
| C | 0 | -4.742627 | 0.720698  | 0.506196  |
| O | 0 | -3.913134 | 0.148804  | -1.654024 |
| O | 0 | -4.679308 | 0.932831  | 1.697897  |
| O | 0 | -5.806012 | 1.065488  | -0.231533 |
| O | 0 | 2.286954  | -5.507267 | -0.698638 |
| O | 0 | 4.848167  | -2.916232 | -1.097355 |
| O | 0 | 5.396223  | -1.033515 | 0.609108  |
| C | 0 | 3.490957  | -1.344863 | 2.007212  |
| C | 0 | 3.313528  | 1.029688  | 0.014972  |
| C | 0 | 2.812680  | 1.983247  | -1.079009 |
| C | 0 | 2.843870  | 3.453405  | -0.642750 |
| C | 0 | 2.350784  | 4.421386  | -1.725897 |

|   |   |           |           |           |
|---|---|-----------|-----------|-----------|
| C | O | 2.376479  | 5.887164  | -1.280280 |
| H | O | 4.232513  | -3.571788 | 0.777675  |
| H | O | 3.743826  | -0.561223 | -1.383600 |
| H | O | 0.107316  | -2.470629 | -2.127647 |
| H | O | -1.691727 | -5.445981 | -0.253150 |
| H | O | -0.284851 | -6.553313 | -0.418890 |
| H | O | -1.515422 | -6.465555 | -1.715480 |
| H | O | -0.773630 | -0.878158 | -0.376272 |
| H | O | -0.748788 | -2.206490 | 0.810216  |
| H | O | -3.337503 | -1.547766 | 1.229422  |
| H | O | -4.601366 | -1.921753 | 0.043518  |
| H | O | -2.686815 | 0.483976  | -0.007891 |
| H | O | -3.499728 | -0.600678 | -2.124847 |
| H | O | -5.603196 | 0.798346  | -1.156864 |
| H | O | 5.057286  | -3.848476 | -1.266732 |
| H | O | 5.806012  | -1.505184 | -0.142691 |
| H | O | 3.995090  | -2.092686 | 2.626930  |
| H | O | 2.412856  | -1.524490 | 2.050451  |
| H | O | 3.691842  | -0.359492 | 2.436638  |
| H | O | 2.713094  | 1.160943  | 0.923791  |
| H | O | 4.349890  | 1.271391  | 0.275998  |
| H | O | 3.429851  | 1.856142  | -1.980284 |
| H | O | 1.788439  | 1.708961  | -1.363510 |
| H | O | 2.228140  | 3.577068  | 0.260554  |
| H | O | 3.869518  | 3.725409  | -0.352217 |
| H | O | 1.327765  | 4.145376  | -2.018614 |
| H | O | 2.968911  | 4.301336  | -2.626930 |
| H | O | 1.738182  | 6.044546  | -0.401920 |
| H | O | 2.020754  | 6.553313  | -2.074768 |
| H | O | 3.392718  | 6.201163  | -1.011285 |

Free Energy (PCM/B3LYP/6-31G\*) = -1757.657014  
Number of imaginary frequencies = 0

**2-3R-c23**

B3LYP/6-31G\* geometry

|   |   |           |           |           |
|---|---|-----------|-----------|-----------|
| O | O | 1.470598  | -0.486424 | -0.138960 |
| C | O | 1.676220  | -2.865117 | -0.317470 |
| C | O | 3.538832  | -1.617677 | 0.733994  |
| C | O | 3.129888  | -2.933669 | 0.014494  |
| C | O | 2.941401  | -0.413158 | -0.058171 |
| C | O | 0.987987  | -1.702293 | -0.369253 |
| C | O | -0.477587 | -1.922933 | -0.666044 |
| N | O | -0.542471 | -3.392945 | -0.567952 |
| C | O | 0.752744  | -3.961306 | -0.606153 |
| O | O | -1.494229 | -3.972950 | -1.427798 |
| C | O | -2.363641 | -4.842872 | -0.689858 |
| C | O | -1.467032 | -1.249280 | 0.299078  |
| S | O | -1.732801 | 0.543936  | -0.022353 |
| C | O | -3.100707 | 0.498722  | -1.250716 |
| C | O | -4.507644 | 0.333315  | -0.653836 |
| C | O | -4.826256 | 1.411568  | 0.377681  |
| O | O | -4.678867 | -0.936553 | -0.058857 |
| O | O | -5.168043 | 1.147794  | 1.514524  |
| O | O | -4.702241 | 2.651715  | -0.107109 |
| O | O | 0.986859  | -5.145971 | -0.808122 |
| O | O | 3.962172  | -3.019673 | -1.160876 |
| O | O | 4.957617  | -1.500977 | 0.698382  |
| C | O | 3.112114  | -1.634960 | 2.201466  |
| C | O | 3.278879  | 0.963302  | 0.495805  |
| C | O | 2.887266  | 2.117308  | -0.438278 |
| C | O | 3.264899  | 3.488986  | 0.138374  |
| C | O | 2.827182  | 4.686490  | -0.721012 |
| C | O | 3.521222  | 4.777111  | -2.085627 |
| H | O | 3.344386  | -3.785928 | 0.670659  |
| H | O | 3.298155  | -0.501274 | -1.092483 |
| H | O | -0.700807 | -1.626168 | -1.699566 |
| H | O | -3.079272 | -5.216080 | -1.426570 |
| H | O | -2.891569 | -4.298853 | 0.100707  |
| H | O | -1.802865 | -5.677942 | -0.259697 |
| H | O | -1.115071 | -1.340759 | 1.330297  |
| H | O | -2.439246 | -1.737588 | 0.226329  |
| H | O | -2.921780 | -0.309503 | -1.965415 |
| H | O | -3.044913 | 1.443757  | -1.797132 |
| H | O | -5.226051 | 0.453893  | -1.480616 |
| H | O | -4.942179 | -0.766212 | 0.866352  |
| H | O | -4.922546 | 3.281805  | 0.606827  |
| H | O | 3.960288  | -3.941032 | -1.465162 |

|   |   |          |           |           |
|---|---|----------|-----------|-----------|
| H | O | 5.226051 | -1.939890 | -0.132660 |
| H | O | 3.505968 | -2.530604 | 2.691689  |
| H | O | 2.023776 | -1.627376 | 2.309453  |
| H | O | 3.514846 | -0.760889 | -2.720669 |
| H | O | 2.788327 | 1.092663  | 1.468729  |
| H | O | 4.359616 | 0.979231  | 0.676351  |
| H | O | 3.375425 | 1.969581  | -1.411116 |
| H | O | 1.805595 | 2.086411  | -0.625009 |
| H | O | 2.813525 | 3.588118  | 1.135937  |
| H | O | 4.353842 | 3.531117  | 0.290906  |
| H | O | 3.025437 | 5.609458  | -0.159593 |
| H | O | 1.738078 | 4.646578  | -0.866226 |
| H | O | 4.611801 | 4.819216  | -1.970117 |
| H | O | 3.208688 | 5.677942  | -2.626418 |
| H | O | 3.287937 | 3.915065  | -2.720669 |

Free Energy (PCM/B3LYP/6-31G\*) = -1757.656991  
Number of imaginary frequencies = 0

**2-3R-c24**

B3LYP/6-31G\* geometry

|   |   |           |           |           |
|---|---|-----------|-----------|-----------|
| O | O | 0.372795  | -0.380886 | -0.708074 |
| C | O | -0.853848 | -2.359359 | -0.137654 |
| C | O | 0.972138  | -1.654783 | 1.380182  |
| C | O | 0.091818  | -2.847680 | 0.908809  |
| C | O | 1.484583  | -0.880243 | 0.124720  |
| C | O | -0.644950 | -1.221923 | -0.836123 |
| C | O | -1.757664 | -0.942055 | -1.814593 |
| N | O | -2.731534 | -1.976790 | -1.425212 |
| C | O | -2.100999 | -2.956942 | -0.605959 |
| O | O | -3.423987 | -2.509379 | -2.538613 |
| C | O | -4.828890 | -2.583073 | -2.271030 |
| C | O | -2.290998 | 0.496333  | -1.802210 |
| S | O | -2.770374 | 1.167485  | -0.161297 |
| C | O | -4.531713 | 0.643559  | -0.019512 |
| C | O | -5.294827 | 1.617490  | 0.883203  |
| C | O | -5.361675 | 3.031494  | 0.309422  |
| O | O | -4.705835 | 1.668649  | 2.166221  |
| O | O | -5.026381 | 4.010679  | 0.948211  |
| O | O | -5.859098 | 3.072321  | -0.931346 |
| O | O | -2.578148 | -4.057041 | -0.363490 |
| O | O | 1.006361  | -3.842057 | 0.401199  |
| O | O | 2.111540  | -2.172321 | 2.059684  |
| C | O | 0.212322  | -0.761592 | 2.360012  |
| C | O | 2.376361  | 0.317088  | 0.420133  |
| C | O | 3.068099  | 0.892641  | -0.823662 |
| C | O | 3.961587  | 2.096863  | -0.500102 |
| C | O | 4.659715  | 2.686443  | -1.732197 |
| C | O | 5.544482  | 3.893377  | -1.402877 |
| H | O | -0.447597 | -3.259866 | 1.769697  |
| H | O | 2.019721  | -1.604229 | -0.503093 |
| H | O | -1.409063 | -1.158105 | -2.835517 |
| H | O | -5.250597 | -1.592092 | -2.073266 |
| H | O | -5.031165 | -3.251585 | -1.429428 |
| H | O | -5.265590 | -2.994741 | -3.184476 |
| H | O | -3.130904 | 0.585275  | -2.496691 |
| H | O | -1.496573 | 1.156100  | -2.163810 |
| H | O | -4.591052 | -0.360677 | 0.404621  |
| H | O | -4.984605 | 0.633295  | -1.013983 |
| H | O | -6.333873 | 1.255596  | 0.953310  |
| H | O | -4.608438 | 2.617057  | 2.378224  |
| H | O | -5.889182 | 4.006680  | -1.216334 |
| H | O | 0.560406  | -4.703323 | 0.424404  |
| H | O | 2.294803  | -3.029187 | 1.626233  |
| H | O | -0.621092 | -0.242959 | 1.877025  |
| H | O | 0.886195  | -0.011192 | 2.783141  |
| H | O | -0.179722 | -1.365341 | 3.184476  |
| H | O | 1.779364  | 1.099088  | 0.905624  |
| H | O | 3.126953  | -0.012827 | 1.147109  |
| H | O | 3.672656  | 0.106576  | -1.299214 |
| H | O | 2.309828  | 1.188758  | -1.560194 |
| H | O | 3.355858  | 2.878904  | -0.018502 |
| H | O | 4.719807  | 1.799618  | 0.239513  |
| H | O | 3.900833  | 2.978979  | -2.471753 |
| H | O | 5.268018  | 1.906226  | -2.211427 |
| H | O | 4.956747  | 4.703323  | -0.953066 |
| H | O | 6.028708  | 4.291964  | -2.301868 |
| H | O | 6.333873  | 3.622584  | -0.690715 |

Free Energy (PCM/B3LYP/6-31G\*) = -1757.656890  
Number of imaginary frequencies = 0

### 2-3R-c25

B3LYP/6-31G\* geometry

|     |           |           |           |
|-----|-----------|-----------|-----------|
| O 0 | 1.265153  | -1.637313 | -1.193946 |
| C 0 | -0.469904 | -2.236077 | 0.345366  |
| C 0 | 1.785692  | -3.099071 | 0.775696  |
| C 0 | 0.412428  | -2.772121 | 1.425088  |
| C 0 | 2.259527  | -1.946819 | -0.146286 |
| C 0 | -0.003170 | -1.751932 | -0.823733 |
| C 0 | -1.121642 | -1.359771 | -1.757421 |
| N 0 | -2.258216 | -1.973282 | -1.049334 |
| C 0 | -1.922680 | -2.285357 | 0.282756  |
| O 0 | -3.511845 | -1.390456 | -1.268551 |
| C 0 | -4.426666 | -2.346847 | -1.844315 |
| C 0 | -1.258523 | 0.158465  | -1.997190 |
| S 0 | -1.472906 | 1.173117  | -0.475224 |
| C 0 | -3.176523 | 1.876269  | -0.651606 |
| C 0 | -4.077979 | 1.611853  | 0.560786  |
| C 0 | -3.416025 | 2.115988  | 1.858613  |
| O 0 | -4.467345 | 0.260480  | 0.754120  |
| O 0 | -3.041103 | 3.260013  | 2.012927  |
| O 0 | -3.293483 | 1.177715  | 2.802331  |
| O 0 | -2.726721 | -2.609719 | 1.154853  |
| O 0 | -0.101111 | -3.996895 | 1.962176  |
| O 0 | 1.603834  | -4.220979 | -0.092429 |
| C 0 | 2.838832  | -3.440492 | 1.837991  |
| C 0 | 2.646903  | -0.636507 | 0.544237  |
| C 0 | 3.222001  | 0.413070  | -0.418340 |
| C 0 | 3.626432  | 1.710561  | 0.292648  |
| C 0 | 4.204413  | 2.766425  | -0.658704 |
| C 0 | 4.596980  | 4.066363  | 0.050893  |
| H 0 | 0.546519  | -2.043838 | 2.237497  |
| H 0 | 3.104877  | -2.331848 | -0.723037 |
| H 0 | -0.986553 | -1.832371 | -2.738370 |
| H 0 | -4.583529 | -3.180459 | -1.155954 |
| H 0 | -4.041346 | -2.705582 | -2.802331 |
| H 0 | -5.355673 | -1.792848 | -1.991009 |
| H 0 | -2.101105 | 0.344647  | -2.665519 |
| H 0 | -0.350453 | 0.498145  | -2.501952 |
| H 0 | -3.640583 | 1.467921  | -1.552295 |
| H 0 | -3.081871 | 2.957137  | -0.773315 |
| H 0 | -4.982787 | 2.219757  | 0.419974  |
| H 0 | -4.060662 | -0.327355 | 0.080508  |
| H 0 | -3.671234 | 0.357251  | 2.398714  |
| H 0 | -1.062561 | -3.873096 | 2.070239  |
| H 0 | 0.970837  | -4.798331 | 0.375095  |
| H 0 | 2.519990  | -4.340661 | 2.371988  |
| H 0 | 2.968751  | -2.640118 | 2.572627  |
| H 0 | 3.804722  | -3.646621 | 1.365200  |
| H 0 | 1.774126  | -0.222442 | 1.066485  |
| H 0 | 3.394030  | -0.863424 | 1.312831  |
| H 0 | 2.484288  | 0.639230  | -1.197929 |
| H 0 | 4.097221  | -0.011019 | -0.931697 |
| H 0 | 2.750666  | 2.129786  | 0.809704  |
| H 0 | 4.365010  | 1.484373  | 1.075912  |
| H 0 | 3.467726  | 2.985704  | -1.444465 |
| H 0 | 5.082638  | 2.348823  | -1.171211 |
| H 0 | 3.730365  | 4.525914  | 0.542259  |
| H 0 | 5.007939  | 4.798331  | -0.653965 |
| H 0 | 5.355673  | 3.882791  | 0.821840  |

Free Energy (PCM/B3LYP/6-31G\*) = -1757.656880  
Number of imaginary frequencies = 0

### 2-3R-c26

B3LYP/6-31G\* geometry

|     |          |           |           |
|-----|----------|-----------|-----------|
| O 0 | 0.909081 | -0.941527 | -0.438004 |
| C 0 | 3.208658 | -1.404570 | 0.033226  |
| C 0 | 1.736241 | -3.310381 | -0.549476 |
| C 0 | 3.065081 | -2.886896 | 0.138785  |
| C 0 | 0.608284 | -2.340536 | -0.081327 |
| C 0 | 2.171238 | -0.580606 | -0.238151 |
| C 0 | 2.606324 | 0.863819  | -0.341034 |
| N 0 | 4.069782 | 0.700201  | -0.264049 |
| C 0 | 4.415102 | -0.593924 | 0.188595  |
| O 0 | 4.725855 | 1.773384  | 0.367283  |

|     |           |           |           |
|-----|-----------|-----------|-----------|
| C 0 | 5.800531  | 2.249748  | -0.455180 |
| C 0 | 2.207242  | 1.606808  | -1.629151 |
| S 0 | 0.456414  | 2.150872  | -1.721051 |
| C 0 | 0.505866  | 3.657213  | -0.654964 |
| C 0 | -0.779951 | 3.772427  | 0.166962  |
| C 0 | -0.970591 | 2.604601  | 1.131795  |
| O 0 | -1.900342 | 3.850286  | -0.689940 |
| O 0 | -1.997082 | 1.953827  | 1.174643  |
| O 0 | 0.083071  | 2.406337  | 1.933771  |
| O 0 | 5.526119  | -0.917773 | 0.588900  |
| O 0 | 2.966503  | -3.335498 | 1.506343  |
| O 0 | 1.393095  | -4.621172 | -0.111993 |
| C 0 | 1.888358  | -3.353863 | -2.069435 |
| C 0 | -0.782260 | -2.633440 | -0.626386 |
| C 0 | -1.895073 | -1.874556 | 0.111299  |
| C 0 | -3.283817 | -2.113809 | -0.493875 |
| C 0 | -4.405152 | -1.374580 | 0.247728  |
| C 0 | -5.787737 | -1.596929 | -0.374152 |
| H 0 | 3.904231  | -3.398858 | -0.348012 |
| H 0 | 0.596774  | -2.370602 | 1.015898  |
| H 0 | 2.260019  | 1.420198  | 0.539866  |
| H 0 | 5.435242  | 2.573343  | -1.435750 |
| H 0 | 6.566355  | 1.478215  | -0.577254 |
| H 0 | 6.214749  | 3.102186  | 0.088759  |
| H 0 | 2.372508  | 0.966003  | -2.499734 |
| H 0 | 2.851017  | 2.483249  | -1.739652 |
| H 0 | 0.602461  | 4.545435  | -1.284663 |
| H 0 | 1.372129  | 3.608129  | 0.008640  |
| H 0 | -0.704704 | 4.684742  | 0.781423  |
| H 0 | -2.541980 | 3.195243  | -0.353975 |
| H 0 | -0.122390 | 1.657334  | 2.527278  |
| H 0 | 3.861823  | -3.363949 | 1.879253  |
| H 0 | 1.745785  | -4.684742 | 0.797366  |
| H 0 | 2.720811  | -4.010752 | -2.339774 |
| H 0 | 2.076333  | -2.361325 | -2.488767 |
| H 0 | 0.979039  | -3.753486 | -2.527278 |
| H 0 | -0.807055 | -2.386301 | -1.695232 |
| H 0 | -0.945869 | -3.713444 | -0.540768 |
| H 0 | -1.899359 | -2.182439 | 1.167280  |
| H 0 | -1.675950 | -0.799122 | 0.104970  |
| H 0 | -3.278796 | -1.799305 | -1.548135 |
| H 0 | -3.500559 | -3.192546 | -0.498389 |
| H 0 | -4.178409 | -0.299287 | 0.264956  |
| H 0 | -4.419360 | -1.699763 | 1.297790  |
| H 0 | -5.813921 | -1.249130 | -1.414391 |
| H 0 | -6.566355 | -1.057498 | 0.177579  |
| H 0 | -6.055350 | -2.660980 | -0.374327 |

Free Energy (PCM/B3LYP/6-31G\*) = -1757.656832  
Number of imaginary frequencies = 0

### 2-3R-c27

B3LYP/6-31G\* geometry

|     |           |           |           |
|-----|-----------|-----------|-----------|
| O 0 | 0.453823  | -0.018969 | -0.450314 |
| C 0 | 2.258658  | 1.469581  | 0.061526  |
| C 0 | 0.430256  | 1.264413  | 1.718984  |
| C 0 | 1.579109  | 2.172218  | 1.192235  |
| C 0 | -0.390550 | 0.738218  | 0.499433  |
| C 0 | 1.663259  | 0.478806  | -0.643179 |
| C 0 | 2.556344  | -0.076117 | -1.723361 |
| N 0 | 3.847991  | 0.555837  | -1.370907 |
| C 0 | 3.591044  | 1.673477  | -0.479727 |
| O 0 | 4.538528  | 0.955388  | -2.548667 |
| C 0 | 5.931968  | 0.629391  | -2.475906 |
| C 0 | 2.585196  | -1.603266 | -1.845184 |
| S 0 | 2.801020  | -2.541584 | -0.275654 |
| C 0 | 4.573537  | -3.056819 | -0.281363 |
| C 0 | 5.460009  | -2.289796 | 0.702012  |
| C 0 | 4.923826  | -2.414676 | 2.142498  |
| O 0 | 5.673595  | -0.920399 | 0.386274  |
| O 0 | 4.591037  | -3.468887 | 2.642540  |
| O 0 | 4.881976  | -1.254198 | 2.806928  |
| O 0 | 4.410997  | 2.547500  | -0.259300 |
| O 0 | 0.956654  | 3.403991  | 0.776555  |
| O 0 | -0.446601 | 2.056300  | 2.512051  |
| C 0 | 0.976880  | 0.145566  | 2.604587  |
| C 0 | -1.568249 | -0.161089 | 0.843947  |
| C 0 | -2.493276 | -0.449477 | -0.347031 |

|   |   |           |           |           |
|---|---|-----------|-----------|-----------|
| C | O | -3.682271 | -1.342044 | 0.030786  |
| C | O | -4.614232 | -1.646177 | -1.149206 |
| C | O | -5.800317 | -2.536932 | -0.764949 |
| H | O | 2.281079  | 2.376395  | 2.008909  |
| H | O | -0.736475 | 1.616937  | -0.058886 |
| H | O | 2.239679  | 0.326385  | -2.696101 |
| H | O | 6.413804  | 1.146216  | -1.641663 |
| H | O | 6.344604  | 0.987427  | -3.422059 |
| H | O | 6.087481  | -0.450662 | -2.388463 |
| H | O | 3.357190  | -1.903478 | -2.558296 |
| H | O | 1.623363  | -1.927089 | -2.251752 |
| H | O | 4.970681  | -2.975855 | -1.296260 |
| H | O | 4.584153  | -4.110744 | 0.003941  |
| H | O | 6.446072  | -2.773618 | 0.699894  |
| H | O | 4.937757  | -0.572649 | -0.169190 |
| H | O | 5.198966  | -0.574906 | 2.164708  |
| H | O | 1.619924  | 4.110744  | 0.816581  |
| H | O | -0.414530 | 2.946887  | 2.109952  |
| H | O | 1.562118  | 0.578038  | 3.422059  |
| H | O | 1.615511  | -0.543980 | 2.045076  |
| H | O | 0.153734  | -0.425166 | 3.043263  |
| H | O | -1.192784 | -1.104927 | 1.258128  |
| H | O | -2.129272 | 0.340145  | 1.640748  |
| H | O | -2.865460 | 0.501231  | -0.755544 |
| H | O | -1.918289 | -0.928428 | -1.150139 |
| H | O | -3.308139 | -2.288062 | 0.449493  |
| H | O | -4.258563 | -0.859435 | 0.834010  |
| H | O | -4.036886 | -2.129570 | -1.950081 |
| H | O | -4.986838 | -0.701066 | -1.569146 |
| H | O | -5.458782 | -3.502563 | -0.371750 |
| H | O | -6.446072 | -2.737544 | -1.627656 |
| H | O | -6.415726 | -2.063081 | 0.009836  |

Free Energy (PCM/B3LYP/6-31G\*) = -1757.656733  
Number of imaginary frequencies = 0

**2-3R-c28**

B3LYP/6-31G\* geometry

|   |   |           |           |           |
|---|---|-----------|-----------|-----------|
| O | O | -0.788834 | 0.075022  | -0.609152 |
| C | O | 0.185747  | 2.259194  | -0.434970 |
| C | O | -1.686048 | 1.700092  | 1.085817  |
| C | O | -0.886743 | 2.854101  | 0.415458  |
| C | O | -2.013926 | 0.623627  | 0.003448  |
| C | O | 0.152550  | 0.977091  | -0.858723 |
| C | O | 1.370984  | 0.616216  | -1.673196 |
| N | O | 2.194134  | 1.816090  | -1.455552 |
| C | O | 1.415081  | 2.877137  | -0.938432 |
| O | O | 3.045857  | 2.133147  | -2.526603 |
| C | O | 4.406881  | 2.202024  | -2.074686 |
| C | O | 2.061145  | -0.700822 | -1.314626 |
| S | O | 2.684630  | -0.692607 | 0.420065  |
| C | O | 3.287156  | -2.419045 | 0.579076  |
| C | O | 4.667393  | -2.685358 | -0.041820 |
| C | O | 5.727827  | -1.713800 | 0.468448  |
| O | O | 4.621074  | -2.615748 | -1.451696 |
| O | O | 6.404999  | -1.033958 | -0.279829 |
| O | O | 5.839753  | -1.712384 | 1.800478  |
| O | O | 1.765542  | 4.049601  | -0.912768 |
| O | O | -1.846339 | 3.609040  | -0.353673 |
| O | O | -2.921087 | 2.222112  | 1.565316  |
| C | O | -0.928002 | 1.125683  | 2.282248  |
| C | O | -2.827425 | -0.567187 | 0.489755  |
| C | O | -3.337966 | -1.464966 | -0.646516 |
| C | O | -4.165866 | -2.650375 | -0.130784 |
| C | O | -4.648184 | -3.616322 | -1.225785 |
| C | O | -5.655004 | -3.008009 | -2.209877 |
| H | O | -0.463092 | 3.498508  | 1.195071  |
| H | O | -2.545406 | 1.136548  | -0.808680 |
| H | O | 1.092041  | 0.561902  | -2.735868 |
| H | O | 4.532070  | 3.008357  | -1.345482 |
| H | O | 4.989208  | 2.421178  | -2.973072 |
| H | O | 4.731810  | 1.250621  | -1.640195 |
| H | O | 2.893269  | -0.879341 | -1.995959 |
| H | O | 1.341280  | -1.517235 | -1.430094 |
| H | O | 2.559122  | -3.103289 | 0.133755  |
| H | O | 3.326492  | -2.621233 | 1.652721  |
| H | O | 4.976728  | -3.695437 | 0.274124  |
| H | O | 5.339628  | -2.008468 | -1.714336 |

|   |   |           |           |           |
|---|---|-----------|-----------|-----------|
| H | O | 6.535961  | -1.072424 | 2.047560  |
| H | O | -1.475225 | 4.490216  | -0.518630 |
| H | O | -3.148766 | 2.941342  | 0.943806  |
| H | O | -0.659074 | 1.930882  | 2.973072  |
| H | O | -0.014881 | 0.606947  | 1.975958  |
| H | O | -1.561566 | 0.416296  | 2.822215  |
| H | O | -2.221435 | -1.159628 | -1.186599 |
| H | O | -3.673588 | -0.166780 | 1.059384  |
| H | O | -3.937877 | -0.857623 | -1.337676 |
| H | O | -2.484622 | -1.842530 | -1.225334 |
| H | O | -3.561496 | -3.213132 | 0.594930  |
| H | O | -5.035681 | -2.270411 | 0.425779  |
| H | O | -5.106292 | -4.490216 | -0.743329 |
| H | O | -3.777884 | -3.995844 | -1.780270 |
| H | O | -6.535961 | -2.621478 | -1.681807 |
| H | O | -6.001078 | -3.757155 | -2.931387 |
| H | O | -5.219756 | -2.179310 | -2.779536 |

Free Energy (PCM/B3LYP/6-31G\*) = -1757.656681  
Number of imaginary frequencies = 0

**2-3R-c29**

B3LYP/6-31G\* geometry

|   |   |           |           |           |
|---|---|-----------|-----------|-----------|
| O | O | 1.242168  | -0.873372 | -0.082882 |
| C | O | 0.173918  | -3.001588 | -0.350953 |
| C | O | 2.593542  | -2.980873 | 0.171062  |
| C | O | 1.426589  | -3.809289 | -0.437862 |
| C | O | 2.527470  | -1.528766 | -0.398394 |
| C | O | 0.178693  | -1.659409 | -0.194443 |
| C | O | -1.215274 | -1.087544 | -0.084945 |
| N | O | -2.005540 | -2.332285 | -0.017982 |
| C | O | -1.214426 | -3.446948 | -0.413901 |
| O | O | -3.260778 | -2.257709 | -0.669993 |
| C | O | -4.295226 | -2.801373 | 0.170261  |
| C | O | -1.375558 | -0.168554 | 1.133445  |
| S | O | -3.043347 | 0.546999  | 1.411150  |
| C | O | -3.193712 | 1.804010  | 0.069980  |
| C | O | -4.070263 | 1.370843  | -1.119145 |
| C | O | -5.512105 | 1.140094  | -0.649622 |
| O | O | -3.537009 | 0.313942  | -1.880291 |
| O | O | -6.105985 | 1.902054  | 0.086258  |
| O | O | -6.055750 | 0.015662  | -1.148641 |
| O | O | -1.671801 | -4.543062 | -0.705917 |
| O | O | 1.806997  | -4.091639 | -1.799821 |
| O | O | 3.826369  | -3.553905 | -0.251256 |
| C | O | 2.562207  | -3.023095 | 1.698676  |
| C | O | 3.622975  | -0.589098 | 0.083352  |
| C | O | 3.680127  | 0.736371  | -0.689524 |
| C | O | 4.795229  | 1.664706  | -0.192709 |
| C | O | 4.868647  | 2.992678  | -0.957476 |
| C | O | 5.982360  | 3.917000  | -0.454746 |
| H | O | 1.327588  | -4.752360 | 0.112764  |
| H | O | 2.554572  | -1.611417 | -1.492285 |
| H | O | -1.467572 | -0.540485 | -1.001797 |
| H | O | -4.118271 | -3.866344 | 0.335998  |
| H | O | -5.217892 | -2.652423 | -0.394151 |
| H | O | -4.342789 | -2.261726 | 1.119715  |
| H | O | -0.647701 | 0.645307  | 1.065411  |
| H | O | -1.164917 | -0.733252 | 2.046647  |
| H | O | -2.193548 | 2.058583  | -0.289777 |
| H | O | -3.630614 | 2.694703  | 0.527101  |
| H | O | -4.120285 | 2.233487  | -1.797923 |
| H | O | -3.619903 | -0.526764 | -1.383606 |
| H | O | -6.965889 | -0.044821 | -0.797345 |
| H | O | 1.292430  | -4.855005 | -2.106177 |
| H | O | 3.641102  | -3.927539 | -1.135370 |
| H | O | 2.548908  | -4.062542 | 2.040517  |
| H | O | 1.684587  | -2.510859 | 2.103352  |
| H | O | 3.456956  | -2.544458 | 2.106177  |
| H | O | 3.482217  | -0.388998 | 1.152957  |
| H | O | 4.573551  | -1.123817 | -0.021853 |
| H | O | 3.829595  | 0.525246  | -1.758411 |
| H | O | 2.713365  | 1.249990  | -0.607357 |
| H | O | 4.646265  | 1.871262  | 0.877589  |
| H | O | 5.762638  | 1.146825  | -0.271774 |
| H | O | 3.901036  | 3.508421  | -0.879030 |
| H | O | 5.018774  | 2.786490  | -2.026770 |
| H | O | 5.839253  | 4.170043  | 0.603165  |

H O 6.009578 4.855005 -1.021264  
H O 6.965889 3.440432 -0.550907  
Free Energy (PCM/B3LYP/6-31G\*) = -1757.656673  
Number of imaginary frequencies = 0

### 2-3R-c30

B3LYP/6-31G\* geometry

O O 1.084807 -1.265988 0.171019  
C O 0.382886 -3.496012 -0.353506  
C O 2.781239 -3.121093 0.138479  
C O 1.750444 -4.061841 -0.548694  
C O 2.446667 -1.646882 -0.249391  
C O 0.164671 -2.202696 -0.029732  
C O -1.302906 -1.901001 0.165271  
N O -1.872091 -3.255785 0.058872  
C O -0.913259 -4.158758 -0.471082  
O O -3.126264 -3.289837 -0.592246  
C O -4.054078 -4.083369 0.160519  
C O -1.561152 -1.177264 1.493190  
S O -3.315229 -0.838756 1.925742  
C O -4.017592 -0.011654 0.448335  
C O -3.438706 1.378933 0.135768  
C O -4.243060 2.046682 -0.979184  
O O -2.084311 1.307901 -0.264372  
O O -3.754122 2.329242 -2.056580  
O O -5.517893 2.270775 -0.643996  
O O -1.180587 -5.272007 -0.905076  
O O 2.129795 -4.120966 -1.939460  
O O 4.077997 -3.419182 -0.368648  
C O 2.811727 -3.345080 1.650142  
C O 3.387032 -0.592130 0.315466  
C O 3.179381 0.801923 -0.293518  
C O 4.147410 1.848718 0.271810  
C O 3.955695 3.244557 -0.335227  
C O 4.924294 4.287237 0.232445  
H O 1.829048 -5.064341 -0.111246  
H O 2.441723 -1.597380 -1.345824  
H O -1.665609 -1.282747 -0.664431  
H O -3.724062 -5.125368 0.202227  
H O -4.994241 -4.014279 -0.392857  
H O -4.181333 -3.678969 1.168947  
H O -1.002114 -0.240466 1.482522  
H O -1.201497 -1.791090 2.325044  
H O -5.082146 0.078547 0.684315  
H O -3.919408 -0.669526 -0.420239  
H O -3.522062 2.007716 1.032087  
H O -2.066052 1.584482 -1.201378  
H O -5.967109 2.683633 -1.407669  
H O 1.739139 -4.921025 -2.325044  
H O 3.926476 -3.717951 -1.287008  
H O 2.988655 -4.403392 1.865214  
H O 1.874225 -3.043698 2.126162  
H O 3.625300 -2.768417 2.098956  
H O 3.264201 -0.543239 1.404685  
H O 4.408947 -0.936656 0.121390  
H O 3.304500 0.741406 -1.384511  
H O 2.145811 1.127546 -0.117892  
H O 4.022806 1.908238 1.363262  
H O 5.182493 1.517610 0.100351  
H O 2.921054 3.574019 -0.163781  
H O 4.080125 3.184291 -1.425786  
H O 4.798804 4.394696 1.317087  
H O 4.762818 5.272007 -0.221101  
H O 5.967109 4.001226 0.046816  
Free Energy (PCM/B3LYP/6-31G\*) = -1757.656597  
Number of imaginary frequencies = 0

### 2-3R-c31

B3LYP/6-31G\* geometry

O O 1.022983 -0.918720 -0.904245  
C O 0.552249 -3.223144 -0.436963  
C O 2.270058 -2.092317 0.939317  
C O 1.742605 -3.464234 0.431134  
C O 2.341274 -1.104392 -0.267584  
C O 0.299297 -2.025885 -1.009380  
C O -0.979745 -2.036431 -1.809255  
N O -1.530294 -3.341373 -1.407526

C O -0.527446 -4.141175 -0.800169  
O O -2.286057 -3.971967 -2.413347  
C O -3.591095 -4.301752 -1.917466  
C O -1.925844 -0.856408 -1.571857  
S O -2.543103 -0.815968 0.165148  
C O -2.704295 0.990679 0.422910  
C O -3.907060 1.637449 -0.301559  
C O -3.900425 3.140601 -0.029652  
O O -5.141663 1.099548 0.112003  
O O -4.717011 3.679517 0.692241  
O O -2.890862 3.776815 -0.637091  
O O -0.623294 -5.346597 -0.614930  
O O 2.838230 -4.069654 -0.286349  
O O 3.595340 -2.267754 1.430038  
C O 1.412477 -1.565888 2.089505  
C O 2.866453 0.286505 0.057611  
C O 3.177388 1.129842 -1.187093  
C O 3.714516 2.524497 -0.842662  
C O 4.040634 3.372736 -2.078750  
C O 4.574337 4.766153 -1.730669  
H O 1.483464 -4.092151 1.291992  
H O 2.972938 -1.576401 -1.030976  
H O -0.738757 -2.065191 -2.881999  
H O -4.111250 -4.747447 -2.768895  
H O -4.124020 -3.406319 -1.580269  
H O -3.524584 -5.027072 -1.100923  
H O -2.765026 -0.925359 -2.268685  
H O -1.384592 0.072137 -1.777436  
H O -1.771577 1.482436 0.130908  
H O -2.831316 1.115009 1.503322  
H O -3.804743 1.485288 -1.382258  
H O -5.497231 1.722950 0.773399  
H O -2.931674 4.720988 -0.387165  
H O 2.677980 -5.025254 -0.334866  
H O 3.972307 -2.986040 0.884623  
H O 1.354452 -2.318569 2.881999  
H O 0.396984 -1.323248 1.762263  
H O 1.863134 -0.664169 2.513858  
H O 2.136735 0.809601 0.688336  
H O 3.774345 0.154839 0.656794  
H O 3.913468 0.598822 -1.808109  
H O 2.270675 1.228384 -1.798157  
H O 2.976996 3.055833 -0.222895  
H O 4.617835 2.423767 -0.222886  
H O 3.137725 3.470237 -2.698209  
H O 4.778641 2.841815 -2.696712  
H O 3.844215 5.333504 -1.140108  
H O 4.796102 5.346597 -2.633696  
H O 5.497231 4.700452 -1.141154  
Free Energy (PCM/B3LYP/6-31G\*) = -1757.656527  
Number of imaginary frequencies = 0

### 2-3R-c32

B3LYP/6-31G\* geometry

O O 1.181895 -0.075277 -0.318240  
C O 2.923326 -1.712287 -0.462592  
C O 3.527311 0.554322 0.332502  
C O 4.062331 -0.760968 -0.301195  
C O 2.219898 0.969996 -0.411128  
C O 1.631158 -1.316644 -0.459601  
C O 0.679148 -2.481314 -0.602524  
N O 1.624885 -3.605112 -0.484199  
C O 2.960200 -3.162833 -0.643053  
O O 1.256817 -4.734383 -1.238798  
C O 1.260842 -5.905821 -0.410420  
C O -0.438296 -2.595418 0.444894  
S O -1.755233 -1.333526 0.188511  
C O -3.124539 -2.138628 1.122710  
C O -4.478341 -1.628334 0.620423  
C O -4.758557 -2.020016 -0.829438  
O O -4.556173 -0.223323 0.741020  
O O -5.085098 -1.206288 -1.672329  
O O -4.646228 -3.334237 -1.049952  
O O 3.914369 -3.899623 -0.854087  
O O 4.649464 -0.385655 -1.564185  
O O 4.488486 1.584028 0.125320  
C O 3.329999 0.401566 1.840307



|   |   |           |           |           |
|---|---|-----------|-----------|-----------|
| C | 0 | 1.576560  | 2.263311  | 0.068642  |
| C | 0 | 0.480982  | 2.786403  | -0.870584 |
| C | 0 | -0.165313 | 4.084271  | -0.370004 |
| C | 0 | -1.250240 | 4.624428  | -1.310216 |
| C | 0 | -1.900793 | 5.915414  | -0.802393 |
| H | 0 | 4.840174  | -1.182874 | 0.346559  |
| H | 0 | 2.468212  | 1.044399  | -1.477685 |
| H | 0 | 0.240541  | -2.483132 | -1.609906 |
| H | 0 | 0.570839  | -5.796470 | 0.433126  |
| H | 0 | 2.269544  | -6.118065 | -0.043964 |
| H | 0 | 0.925228  | -6.714020 | -1.064812 |
| H | 0 | -0.018619 | -2.514411 | 1.451712  |
| H | 0 | -0.890418 | -3.585070 | 0.334539  |
| H | 0 | -3.031380 | -1.910407 | 2.187807  |
| H | 0 | -3.068194 | -3.222135 | 0.989608  |
| H | 0 | -5.258157 | -2.109595 | 1.233357  |
| H | 0 | -4.890286 | 0.100778  | -0.117652 |
| H | 0 | -4.858987 | -3.504917 | -1.988451 |
| H | 0 | 5.258157  | -1.090902 | -1.835368 |
| H | 0 | 4.921644  | 1.358864  | -0.721476 |
| H | 0 | 4.261512  | 0.061739  | 2.303249  |
| H | 0 | 2.539357  | -0.315840 | 2.078105  |
| H | 0 | 3.063726  | 1.365094  | 2.283852  |
| H | 0 | 1.163001  | 2.108088  | 1.072899  |
| H | 0 | 2.376826  | 3.006205  | 0.160028  |
| H | 0 | 0.912138  | 2.954694  | -1.868245 |
| H | 0 | -0.293715 | 2.018291  | -0.993418 |
| H | 0 | -0.601251 | 3.912809  | 0.625402  |
| H | 0 | 0.612520  | 4.850640  | -0.234754 |
| H | 0 | -2.023185 | 3.855254  | -1.449518 |
| H | 0 | -0.812938 | 4.800713  | -2.303249 |
| H | 0 | -2.376553 | 5.760894  | 0.174090  |
| H | 0 | -2.670532 | 6.274961  | -1.495093 |
| H | 0 | -1.157557 | 6.714020  | -0.685668 |

Free Energy (PCM/B3LYP/6-31G\*) = -1757.656525  
Number of imaginary frequencies = 0

### 2-3R-c33

B3LYP/6-31G\* geometry

|   |   |           |           |           |
|---|---|-----------|-----------|-----------|
| O | 0 | -1.804661 | 0.790343  | 1.349525  |
| C | 0 | -3.063083 | -0.482590 | -0.239274 |
| C | 0 | -3.936269 | 1.717610  | 0.411954  |
| C | 0 | -3.988499 | 0.605430  | -0.673812 |
| C | 0 | -2.477784 | 2.008735  | 0.851002  |
| C | 0 | -2.124397 | -0.327969 | 0.716777  |
| C | 0 | -1.433382 | -1.633792 | 1.035941  |
| N | 0 | -1.997090 | -2.505263 | -0.015380 |
| C | 0 | -3.135409 | -1.890643 | -0.586437 |
| O | 0 | -2.173126 | -3.839588 | 0.398050  |
| C | 0 | -1.544521 | -4.733098 | -0.532208 |
| C | 0 | 0.096680  | -1.595228 | 1.059809  |
| S | 0 | 0.783215  | -1.210197 | -0.608744 |
| C | 0 | 2.378059  | -0.428350 | -0.155917 |
| C | 0 | 3.408834  | -1.421793 | 0.415158  |
| C | 0 | 4.750841  | -0.697184 | 0.574700  |
| O | 0 | 3.621915  | -2.539387 | -0.434878 |
| O | 0 | 4.925603  | 0.190428  | 1.381592  |
| O | 0 | 5.705377  | -1.096449 | -0.275540 |
| O | 0 | -4.002226 | -2.470436 | -1.239095 |
| O | 0 | -5.342114 | 0.136530  | -0.739507 |
| O | 0 | -4.586005 | 1.215415  | 1.581893  |
| C | 0 | -4.649498 | 2.991103  | -0.059999 |
| C | 0 | -1.566204 | 2.663585  | -0.189519 |
| C | 0 | -0.199270 | 3.078546  | 0.374164  |
| C | 0 | 0.698778  | 3.743275  | -0.676547 |
| C | 0 | 2.064990  | 4.171040  | -0.124918 |
| C | 0 | 2.961164  | 4.828285  | -1.179651 |
| H | 0 | -3.699570 | 1.020656  | -1.649742 |
| H | 0 | -2.536868 | 2.633397  | 1.746382  |
| H | 0 | -1.776247 | -1.999012 | 2.014210  |
| H | 0 | -1.691730 | -5.728744 | -0.107073 |
| H | 0 | -0.474584 | -4.519072 | -0.624355 |
| H | 0 | -2.024175 | -4.673603 | -1.513921 |
| H | 0 | 0.476423  | -2.558305 | 1.408274  |
| H | 0 | 0.418028  | -0.819589 | 1.761447  |
| H | 0 | 2.219461  | 0.388458  | 0.552626  |
| H | 0 | 2.752238  | -0.004168 | -1.093262 |

|   |   |           |           |           |
|---|---|-----------|-----------|-----------|
| H | 0 | 3.093829  | -1.748080 | 1.414651  |
| H | 0 | 2.776168  | -2.743073 | -0.878842 |
| H | 0 | 5.316454  | -1.825769 | -0.809974 |
| H | 0 | -5.298539 | -0.786402 | -1.059516 |
| H | 0 | -5.324292 | 0.675679  | 1.238808  |
| H | 0 | -5.705377 | 2.758333  | -0.228466 |
| H | 0 | -4.237089 | 3.382506  | -0.994892 |
| H | 0 | -4.588916 | 3.769996  | 0.707221  |
| H | 0 | -1.426758 | 1.980135  | -1.037584 |
| H | 0 | -2.074876 | 3.551532  | -0.580876 |
| H | 0 | -0.352320 | 3.770297  | 1.215152  |
| H | 0 | 0.309724  | 2.198148  | 0.785972  |
| H | 0 | 0.848603  | 3.050374  | -1.517723 |
| H | 0 | 0.184726  | 4.622290  | -1.092904 |
| H | 0 | 2.577515  | 3.293393  | 0.294291  |
| H | 0 | 1.915087  | 4.865870  | 0.713499  |
| H | 0 | 3.157042  | 4.143595  | -2.014210 |
| H | 0 | 3.928107  | 5.122143  | -0.755337 |
| H | 0 | 2.490642  | 5.728744  | -1.593805 |

Free Energy (PCM/B3LYP/6-31G\*) = -1757.656513  
Number of imaginary frequencies = 0

### 2-3S-c1

B3LYP/6-31G\* geometry

|   |   |           |           |           |
|---|---|-----------|-----------|-----------|
| O | 0 | 1.198683  | -0.348900 | -0.872552 |
| C | 0 | 2.163978  | -2.367055 | -0.021612 |
| C | 0 | 1.111775  | -0.830533 | 1.581714  |
| C | 0 | 1.573895  | -2.295145 | 1.349062  |
| C | 0 | 0.365568  | -0.274816 | 0.344086  |
| C | 0 | 1.961035  | -1.434237 | -0.972150 |
| C | 0 | 2.766816  | -1.715170 | -2.217116 |
| N | 0 | 3.633215  | -2.802535 | -1.727497 |
| C | 0 | 3.156044  | -3.316731 | -0.504735 |
| O | 0 | 4.006579  | -3.743871 | -2.699885 |
| C | 0 | 5.437781  | -3.826879 | -2.788160 |
| C | 0 | 3.545101  | -0.526998 | -2.791066 |
| S | 0 | 4.817729  | 0.127639  | -1.624005 |
| C | 0 | 4.464066  | 1.928536  | -1.676148 |
| C | 0 | 3.269902  | 2.353512  | -0.811990 |
| C | 0 | 2.958962  | 3.844418  | -1.037164 |
| O | 0 | 3.528304  | 2.164107  | 0.572050  |
| O | 0 | 2.810353  | 4.339591  | -2.135464 |
| O | 0 | 2.853053  | 4.551690  | 0.093649  |
| O | 0 | 3.572446  | -4.332546 | 0.048588  |
| O | 0 | 2.554603  | -2.587370 | 2.351232  |
| O | 0 | 2.298845  | -0.027861 | 1.719863  |
| C | 0 | 0.277787  | -0.695404 | 2.859451  |
| C | 0 | -0.991683 | -0.914183 | 0.038302  |
| C | 0 | -1.731252 | -0.249583 | -1.132089 |
| C | 0 | -3.102616 | -0.883719 | -1.396558 |
| C | 0 | -3.860260 | -0.228272 | -2.558417 |
| C | 0 | -5.226042 | -0.869642 | -2.823974 |
| H | 0 | 0.717608  | -2.974101 | 1.463595  |
| H | 0 | 0.246396  | 0.801800  | 0.493411  |
| H | 0 | 2.109541  | -2.108235 | -3.006022 |
| H | 0 | 5.627573  | -4.551690 | -3.583294 |
| H | 0 | 5.863640  | -4.185123 | -1.846446 |
| H | 0 | 5.874310  | -2.858079 | -3.053197 |
| H | 0 | 2.843441  | 0.272752  | -3.043107 |
| H | 0 | 4.036905  | -0.839966 | -3.715484 |
| H | 0 | 4.319579  | 2.250664  | -2.709922 |
| H | 0 | 5.370961  | 2.408021  | -1.294729 |
| H | 0 | 2.376549  | 1.798802  | -1.122112 |
| H | 0 | 3.036010  | 1.378761  | 0.902560  |
| H | 0 | 3.031338  | 3.902525  | 0.817811  |
| H | 0 | 3.068721  | -3.349556 | 2.023366  |
| H | 0 | 2.955667  | -0.606829 | 2.155325  |
| H | 0 | 0.897024  | -0.978640 | 3.715484  |
| H | 0 | -0.602679 | -1.344016 | 2.849407  |
| H | 0 | -0.047371 | 0.340755  | 2.997043  |
| H | 0 | -0.857569 | -1.984327 | -0.167176 |
| H | 0 | -1.611587 | -0.843042 | 0.938866  |
| H | 0 | -1.858452 | 0.821071  | -0.916338 |
| H | 0 | -1.117769 | -0.313313 | -2.039099 |
| H | 0 | -2.973223 | -1.955555 | -1.607769 |
| H | 0 | -3.714946 | -0.823771 | -0.484653 |
| H | 0 | -3.245800 | -0.284553 | -3.468144 |

H O -3.992998 0.841872 -2.345304  
H O -5.122084 -1.932459 -3.075546  
H O -5.742707 -0.378878 -3.656820  
H O -5.874310 -0.800248 -1.941595  
Free Energy (PCM/B3LYP/6-31G\*) = -1757.662634  
Number of imaginary frequencies = 0

### 2-3S-c2

B3LYP/6-31G\* geometry

O O 0.325045 0.096705 0.260099  
C O 2.336799 1.201139 -0.430145  
C O 0.187990 2.081173 -1.285382  
C O 1.730712 2.036126 -1.506092  
C O -0.323589 0.646021 -0.948381  
C O 1.627125 0.337129 0.329942  
C O 2.495727 -0.382535 1.332443  
N O 3.775532 0.286001 1.067807  
C O 3.742138 1.116840 -0.033623  
O O 4.956541 -0.315316 1.468905  
C O 5.521151 0.370527 2.605627  
C O 2.516184 -1.920661 1.201439  
S O 2.625635 -2.632629 -0.491221  
C O 4.422798 -3.010023 -0.715346  
C O 4.888020 -2.618398 -2.136917  
C O 4.900250 -1.101309 -2.266768  
O O 4.060060 -3.183599 -3.131589  
O O 4.057336 -0.510366 -2.930432  
O O 5.852933 -0.534057 -1.544589  
O O 4.727534 1.662357 -0.554800  
O O 1.961952 1.514046 -2.823518  
O O -0.428412 2.473243 -2.508473  
C O -0.189285 3.112869 -0.224779  
C O -1.823738 0.524322 -0.726755  
C O -2.324751 -0.925327 -0.657890  
C O -3.837113 -1.016082 -0.419762  
C O -4.358469 -2.456659 -0.340598  
C O -5.868063 -2.537624 -0.091359  
H O 2.122571 3.061513 -1.470686  
H O -0.004207 -0.005754 -1.771984  
H O 2.166703 -0.156731 2.356156  
H O 5.769062 1.402429 2.342448  
H O 6.429018 -0.187308 2.842840  
H O 4.833451 0.348574 3.456719  
H O 1.570132 -2.289247 1.606448  
H O 3.318107 -2.321818 1.824839  
H O 4.567432 -4.085517 -0.587975  
H O 5.007643 -2.480398 0.039821  
H O 5.911072 -2.993145 -2.266646  
H O 3.503519 -2.450092 -3.456719  
H O 5.623361 0.420766 -1.359966  
H O 2.685181 0.858395 -2.797979  
H O 0.101709 2.043137 -3.207501  
H O 0.240759 4.085517 -0.483209  
H O 0.173555 2.823891 0.766199  
H O -1.275725 3.226202 -0.173168  
H O -2.094075 1.051992 0.196598  
H O -2.314102 1.051101 -1.552925  
H O -2.069201 -1.442610 -1.594114  
H O -1.796821 -1.457498 0.144182  
H O -4.089264 -0.489025 0.512554  
H O -4.365304 -0.482359 -1.223856  
H O -3.826128 -2.989839 0.459935  
H O -4.112367 -2.983026 -1.273747  
H O -6.139542 -2.049377 0.852942  
H O -6.209647 -3.577873 -0.039256  
H O -6.429018 -2.041865 -0.893376

Free Energy (PCM/B3LYP/6-31G\*) = -1757.662085  
Number of imaginary frequencies = 0

### 2-3S-c3

B3LYP/6-31G\* geometry

O O 1.118580 0.502449 -0.829275  
C O 1.854070 -1.537985 0.181228  
C O 1.006327 0.232730 1.663095  
C O 1.316579 -1.286578 1.549939  
C O 0.319029 0.771175 0.382374  
C O 1.745972 -0.671221 -0.841797

C O 2.416965 -1.189256 -2.091021  
N O 2.873089 -2.515875 -1.611356  
C O 2.724570 -2.634275 -0.226875  
O O 4.047614 -3.023746 -2.171220  
C O 3.758748 -4.177114 -2.979192  
C O 3.527082 -0.311005 -2.684831  
S O 4.910540 0.082633 -1.531035  
C O 4.985869 1.909969 -1.701580  
C O 3.876899 2.665653 -0.958595  
C O 3.923466 4.160819 -1.328637  
O O 4.021161 2.554796 0.449342  
O O 3.933463 4.568782 -2.471842  
O O 3.940746 4.977571 -0.269560  
O O 3.236244 -3.495262 0.490212  
O O 2.293538 -1.596536 2.552603  
O O 2.272709 0.910220 1.762248  
C O 0.188619 0.548151 2.919944  
C O -1.108147 0.274293 0.133452  
C O -1.770215 0.911147 -1.097226  
C O -3.213218 0.432858 -1.302448  
C O -3.889401 1.056315 -2.530301  
C O -5.329035 0.573251 -2.734183  
H O 0.402175 -1.865379 1.740957  
H O 0.330327 1.862764 0.443858  
H O 1.664152 -1.323922 -2.879781  
H O 4.726613 -4.488441 -3.378244  
H O 3.079912 -3.923853 -3.800260  
H O 3.328928 -4.977571 -2.369531  
H O 3.071458 0.625549 -3.016424  
H O 3.935536 -0.814254 -3.563013  
H O 4.983626 2.180227 -2.760149  
H O 5.955251 2.194787 -1.280690  
H O 2.893982 2.299375 -1.280002  
H O 3.314491 1.974969 0.815204  
H O 3.937682 4.375409 0.515125  
H O 2.787157 -2.374914 2.222581  
H O 2.852599 0.281217 2.239686  
H O 0.773119 0.264851 3.800260  
H O -0.754898 -0.004000 2.947553  
H O -0.025757 1.619989 2.979024  
H O -1.105544 -0.818905 0.030134  
H O -1.708789 0.504322 1.020343  
H O -1.759330 2.005086 -0.986435  
H O -1.179021 0.683795 -1.992568  
H O -3.222932 -0.662762 -1.401456  
H O -3.806097 0.663826 -0.405114  
H O -3.295011 0.826055 -3.425864  
H O -3.880633 2.151012 -2.431134  
H O -5.365859 -0.514654 -2.871309  
H O -5.784732 1.036166 -3.617069  
H O -5.955251 0.819010 -1.867542

Free Energy (PCM/B3LYP/6-31G\*) = -1757.661660  
Number of imaginary frequencies = 0

### 2-3S-c4

B3LYP/6-31G\* geometry

O O 0.247798 -0.310493 0.393299  
C O -1.734247 -1.296145 -0.524740  
C O 0.454365 -2.125249 -1.337054  
C O -1.075996 -2.043021 -1.634173  
C O 0.952931 -0.736232 -0.832758  
C O -1.059901 -0.528883 0.361044  
C O -1.977356 0.105309 1.378130  
N O -3.252712 -0.483142 0.952164  
C O -3.162501 -1.205640 -0.218344  
O O -4.444697 0.101550 1.342677  
C O -5.102987 -0.695219 2.349796  
C O -1.944913 1.647196 1.430747  
S O -1.907584 2.559205 -0.166389  
C O -3.675127 3.008187 -0.478165  
C O -4.046801 2.780975 -1.961735  
C O -4.081385 1.287279 -2.254296  
O O -3.139912 3.425396 -2.831503  
O O -3.202444 0.745877 -2.913331  
O O -5.099321 0.675527 -1.670940  
O O -4.122412 -1.663007 -0.858650  
O O -1.241318 -1.415856 -2.915570

|   |   |           |           |           |
|---|---|-----------|-----------|-----------|
| O | 0 | 1.131979  | -2.400454 | -2.559058 |
| C | 0 | 0.768733  | -3.260431 | -0.365046 |
| C | 0 | 2.440716  | -0.644432 | -0.528776 |
| C | 0 | 2.933757  | 0.789033  | -0.284160 |
| C | 0 | 4.435973  | 0.844606  | 0.027180  |
| C | 0 | 4.970182  | 2.249538  | 0.351800  |
| C | 0 | 4.921835  | 3.236262  | -0.821090 |
| H | 0 | -1.475080 | -3.063496 | -1.706416 |
| H | 0 | 0.673011  | -0.002813 | -1.600507 |
| H | 0 | -1.728376 | -0.249195 | 2.388124  |
| H | 0 | -6.009466 | -0.138358 | 2.594369  |
| H | 0 | -4.473648 | -0.798777 | 3.239036  |
| H | 0 | -5.360255 | -1.678971 | 1.947897  |
| H | 0 | -1.020914 | 1.930202  | 1.941629  |
| H | 0 | -2.778072 | 2.002353  | 2.040969  |
| H | 0 | -3.804540 | 4.068688  | -0.249066 |
| H | 0 | -4.325022 | 2.422090  | 0.175491  |
| H | 0 | -5.050418 | 3.195529  | -2.119343 |
| H | 0 | -2.577794 | 2.715830  | -3.197481 |
| H | 0 | -4.911243 | -0.301659 | -1.580090 |
| H | 0 | -1.912278 | -0.708928 | -2.855241 |
| H | 0 | 0.632242  | -1.907158 | -3.239036 |
| H | 0 | 0.352732  | -4.199209 | -0.743531 |
| H | 0 | 0.350736  | -3.069542 | 0.628021  |
| H | 0 | 1.850268  | -3.386599 | -0.263534 |
| H | 0 | 2.667336  | -1.268043 | 0.345218  |
| H | 0 | 2.971021  | -1.082299 | -1.381795 |
| H | 0 | 2.707920  | 1.399778  | -1.168590 |
| H | 0 | 2.373970  | 1.231434  | 0.550635  |
| H | 0 | 4.642631  | 0.183488  | 0.880880  |
| H | 0 | 4.998678  | 0.429952  | -0.822667 |
| H | 0 | 6.009466  | 2.156540  | 0.694688  |
| H | 0 | 4.405556  | 2.662091  | 1.200270  |
| H | 0 | 5.479623  | 2.849914  | -1.836367 |
| H | 0 | 5.365371  | 4.199209  | -0.542381 |
| H | 0 | 3.894921  | 3.431018  | -1.150102 |

Free Energy (PCM/B3LYP/6-31G\*) = -1757.660988  
Number of imaginary frequencies = 0

### 2-3S-c5

B3LYP/6-31G\* geometry

|   |   |           |           |           |
|---|---|-----------|-----------|-----------|
| O | 0 | 1.181067  | -0.274276 | -0.017552 |
| C | 0 | 2.233989  | -2.397972 | 0.273156  |
| C | 0 | 0.939240  | -1.498833 | 2.161619  |
| C | 0 | 1.544569  | -2.786485 | 1.537775  |
| C | 0 | 0.263950  | -0.608826 | 1.088147  |
| C | 0 | 2.041424  | -1.225059 | -0.361272 |
| C | 0 | 2.964047  | -1.073447 | -1.552398 |
| N | 0 | 3.557399  | -2.437700 | -1.578244 |
| C | 0 | 3.314474  | -3.120016 | -0.383838 |
| O | 0 | 4.818601  | -2.586609 | -2.155114 |
| C | 0 | 4.718011  | -3.329431 | -3.382044 |
| C | 0 | 4.043727  | 0.014148  | -1.377711 |
| S | 0 | 3.402240  | 1.686694  | -1.829638 |
| C | 0 | 4.364914  | 2.755664  | -0.671581 |
| C | 0 | 3.514819  | 3.382842  | 0.439018  |
| C | 0 | 2.709474  | 2.355245  | 1.235257  |
| O | 0 | 2.627745  | 4.337061  | -0.106556 |
| O | 0 | 1.518557  | 2.517884  | 1.451416  |
| O | 0 | 3.429893  | 1.325022  | 1.656838  |
| O | 0 | 3.898679  | -4.129897 | 0.013138  |
| O | 0 | 2.477388  | -3.319412 | 2.488402  |
| O | 0 | 2.041587  | -0.733601 | 2.698894  |
| C | 0 | -0.015074 | -1.825315 | 3.314419  |
| C | 0 | -1.028742 | -1.165914 | 0.484803  |
| C | 0 | -1.707545 | -0.199151 | -0.496796 |
| C | 0 | -3.018824 | -0.758913 | -1.062104 |
| C | 0 | -3.719161 | 0.200316  | -2.033303 |
| C | 0 | -5.025213 | -0.364944 | -2.600703 |
| H | 0 | 0.745779  | -3.520037 | 1.360750  |
| H | 0 | 0.082042  | 0.366984  | 1.544502  |
| H | 0 | 2.396504  | -0.901168 | -2.474500 |
| H | 0 | 4.335717  | -4.337061 | -3.192798 |
| H | 0 | 5.740663  | -3.381709 | -3.761997 |
| H | 0 | 4.077006  | -2.813786 | -4.104631 |
| H | 0 | 4.886643  | -0.234158 | -2.023903 |
| H | 0 | 4.383693  | 0.035746  | -0.340626 |

|   |   |           |           |           |
|---|---|-----------|-----------|-----------|
| H | 0 | 4.798379  | 3.566201  | -1.262671 |
| H | 0 | 5.185916  | 2.171516  | -0.250984 |
| H | 0 | 4.208856  | 3.870207  | 1.145441  |
| H | 0 | 1.755831  | 4.130200  | 0.283492  |
| H | 0 | 2.836571  | 0.634035  | 2.074636  |
| H | 0 | 3.124861  | -3.840864 | 1.971787  |
| H | 0 | 2.692089  | -1.407622 | 2.988026  |
| H | 0 | 0.546897  | -2.331769 | 4.104631  |
| H | 0 | -0.827801 | -2.485945 | 3.000443  |
| H | 0 | -0.443677 | -0.907868 | 3.730168  |
| H | 0 | -0.822127 | -2.121229 | -0.016010 |
| H | 0 | -1.722274 | -1.384656 | 1.304203  |
| H | 0 | -1.907048 | 0.752499  | 0.016571  |
| H | 0 | -1.021307 | 0.031048  | -1.320744 |
| H | 0 | -2.817019 | -1.710782 | -1.575434 |
| H | 0 | -3.701869 | -0.997706 | -0.233389 |
| H | 0 | -3.035080 | 0.442405  | -2.858976 |
| H | 0 | -3.923864 | 1.149633  | -1.518354 |
| H | 0 | -4.846497 | -1.295107 | -3.154344 |
| H | 0 | -5.503214 | 0.344458  | -3.286054 |
| H | 0 | -5.740663 | -0.588887 | -1.799628 |

Free Energy (PCM/B3LYP/6-31G\*) = -1757.660970  
Number of imaginary frequencies = 0

### 2-3S-c6

B3LYP/6-31G\* geometry

|   |   |           |           |           |
|---|---|-----------|-----------|-----------|
| O | 0 | 0.265163  | -0.385859 | -0.988773 |
| C | 0 | 2.297544  | -1.252001 | -0.066003 |
| C | 0 | 0.150399  | -2.252814 | 0.681971  |
| C | 0 | 1.671238  | -2.090073 | 0.991031  |
| C | 0 | -0.424311 | -0.878020 | 0.217134  |
| C | 0 | 1.582886  | -0.519667 | -0.950663 |
| C | 0 | 2.469798  | 0.179675  | -1.952003 |
| N | 0 | 3.796972  | -0.077047 | -1.359690 |
| C | 0 | 3.715924  | -1.124208 | -0.403060 |
| O | 0 | 4.802181  | -0.250496 | -2.335720 |
| C | 0 | 5.937290  | 0.571832  | -2.036117 |
| C | 0 | 2.162826  | 1.660566  | -2.223992 |
| S | 0 | 1.693608  | 2.728741  | -0.805332 |
| C | 0 | 3.282380  | 3.009584  | 0.095393  |
| C | 0 | 2.993438  | 3.205303  | 1.591599  |
| C | 0 | 2.377342  | 1.946771  | 2.203350  |
| O | 0 | 2.119426  | 4.296838  | 1.801353  |
| O | 0 | 1.260851  | 1.955029  | 2.697736  |
| O | 0 | 3.170644  | 0.886911  | 2.121385  |
| O | 0 | 4.677302  | -1.749045 | 0.019148  |
| O | 0 | 1.814994  | -1.457078 | 2.301404  |
| O | 0 | -0.527368 | -2.629898 | 1.873722  |
| C | 0 | -0.072954 | -3.368011 | -0.338913 |
| C | 0 | -1.913983 | -0.867266 | -0.095490 |
| C | 0 | -2.487509 | 0.541711  | -0.300328 |
| C | 0 | -3.991116 | 0.533163  | -0.603925 |
| C | 0 | -4.577173 | 1.935908  | -0.808280 |
| C | 0 | -6.078993 | 1.924144  | -1.111923 |
| H | 0 | 2.143546  | -3.075539 | 1.043455  |
| H | 0 | -0.198315 | -0.144423 | 1.003581  |
| H | 0 | 2.421432  | -0.345924 | -2.917488 |
| H | 0 | 5.667389  | 1.633314  | -2.024152 |
| H | 0 | 6.644623  | 0.378651  | -2.846390 |
| H | 0 | 6.383039  | 0.286371  | -1.078777 |
| H | 0 | 1.289170  | 1.713135  | -2.880571 |
| H | 0 | 3.001470  | 2.100361  | -2.771240 |
| H | 0 | 3.770101  | 3.907287  | -0.294328 |
| H | 0 | 3.936691  | 2.149782  | -0.050938 |
| H | 0 | 3.953885  | 3.393919  | 2.094336  |
| H | 0 | 1.337844  | 3.917465  | 2.249918  |
| H | 0 | 2.661344  | 0.059704  | 2.349895  |
| H | 0 | 2.203246  | -2.099811 | 2.917488  |
| H | 0 | -0.137150 | -2.085349 | 2.582959  |
| H | 0 | 0.378055  | -4.296838 | 0.023259  |
| H | 0 | 0.366606  | -3.121560 | -1.309498 |
| H | 0 | -1.142791 | -3.543967 | -0.479389 |
| H | 0 | -2.098472 | -1.476617 | -0.988971 |
| H | 0 | -2.421903 | -1.360716 | 0.740577  |
| H | 0 | -2.300472 | 1.142993  | 0.601035  |
| H | 0 | -1.953002 | 1.038632  | -1.120275 |
| H | 0 | -4.177615 | -0.071784 | -1.503713 |

H O -4.525710 0.032154 0.216822  
H O -4.041615 2.435193 -1.628234  
H O -4.389933 2.540090 0.090738  
H O -6.293959 1.355878 -2.025500  
H O -6.466422 2.939870 -1.252352  
H O -6.644623 1.461311 -0.293650  
Free Energy (PCM/B3LYP/6-31G\*) = -1757.660723  
Number of imaginary frequencies = 0

### 3-SR-c1

B3LYP/6-31G\* geometry

O O 1.503449 -0.786739 0.096849  
C O 2.220347 -3.017280 -0.364334  
C O 3.943537 -1.344137 0.190406  
C O 3.677667 -2.708780 -0.505612  
C O 2.854070 -0.342229 -0.297079  
C O 1.294415 -2.090265 -0.053816  
C O -0.079991 -2.700482 0.098025  
N O 0.181602 -4.077951 -0.361120  
C O 1.575326 -4.319891 -0.397069  
O O -0.587187 -5.049723 0.315118  
C O -1.157117 -5.973895 -0.626237  
C O -1.147203 -1.966482 -0.716189  
C O -3.834024 -1.353551 -1.169764  
C O -3.885253 0.020674 -0.458211  
C O -4.979535 0.095036 0.628427  
O O -4.143525 1.012063 -1.423714  
O O -5.863722 0.930976 0.528032  
O O -4.911053 -0.742847 1.644563  
O O 2.098240 -5.430394 -0.453382  
O O 4.501144 -3.720754 0.067768  
O O 5.170919 -0.798335 -0.301685  
C O 3.991155 -1.475653 1.716782  
C O 3.007957 1.085172 0.209276  
C O 2.052878 2.081404 -0.463560  
C O 2.243287 3.516432 0.043570  
C O 1.296388 4.526272 -0.617338  
C O 1.494289 5.958508 -0.110288  
S O -2.819132 -2.649316 -0.338418  
O O -3.010102 -2.447404 1.184356  
H O 3.943795 -2.580827 -1.566874  
H O 2.862392 -0.351088 -1.394497  
H O -0.374795 -2.719766 1.155649  
H O -0.371386 -6.529048 -1.145506  
H O -1.797164 -5.455481 -1.347279  
H O -1.755826 -6.655213 -0.017459  
H O -1.133855 -0.902719 -0.464497  
H O -0.983115 -2.097871 -1.789642  
H O -4.830852 -1.786594 -1.290617  
H O -3.402087 -1.219508 -2.165583  
H O -2.923777 0.224644 0.034533  
H O -4.977326 1.434281 -1.126881  
H O -4.133856 -1.387343 1.547030  
H O 4.078384 -4.575078 -0.142848  
H O 5.863722 -1.452334 -0.108157  
H O 4.741050 -2.219637 1.996810  
H O 3.030994 -1.794995 2.133443  
H O 4.264236 -0.517361 2.165583  
H O 2.855162 1.099549 1.295265  
H O 4.046379 1.382725 0.027375  
H O 1.014749 1.768625 -0.292126  
H O 2.209934 2.055517 -1.551690  
H O 2.094276 3.540082 1.133302  
H O 3.284136 3.828157 -0.128982  
H O 0.256701 4.215568 -0.441696  
H O 1.442937 4.500256 -1.706500  
H O 1.320729 6.023494 0.971095  
H O 0.804940 6.655213 -0.601070  
H O 2.516066 6.308490 -0.303041

Free Energy (PCM/B3LYP/6-31G\*) = -1832.836375  
Number of imaginary frequencies = 0

### 3-SR-c2

B3LYP/6-31G\* geometry

O O 2.005412 -0.539628 0.546624  
C O 2.626364 -2.644921 -0.396050  
C O 4.147240 -0.736368 -0.736504

C O 3.715439 -2.126589 -1.281768  
C O 2.854545 0.094504 -0.479798  
C O 1.913838 -1.861480 0.435422  
C O 0.944642 -2.664375 1.271256  
N O 1.069229 -3.986307 0.628464  
C O 2.229811 -4.028854 -0.178264  
O O 0.891015 -5.064681 1.511764  
C O -0.104673 -5.968574 0.998755  
C O -0.484498 -2.121342 1.323174  
C O -2.545407 -0.851573 0.013474  
C O -3.731164 -0.991425 -0.952750  
C O -4.665168 0.215544 -0.770348  
O O -4.489114 -2.163037 -0.705515  
O O -4.318480 1.356451 -0.987207  
O O -5.890487 -0.099269 -0.338125  
O O 2.761770 -5.051891 -0.601143  
O O 4.837391 -3.004478 -1.327927  
O O 4.828724 -0.018265 -1.769152  
C O 5.034625 -0.856533 0.507431  
C O 3.080344 1.531308 -0.029372  
C O 1.798493 2.376245 -0.013218  
C O 2.047458 3.817290 0.449870  
C O 0.778400 4.678792 0.467732  
C O 1.032461 6.113742 0.941243  
S O -1.323057 -2.193835 -0.322597  
O O -2.164234 -3.485180 -0.357829  
H O 3.337978 -1.964083 -2.303743  
H O 2.263948 0.082362 -1.404932  
H O 1.314126 -2.734093 2.303743  
H O -0.248412 -6.703362 1.794516  
H O 0.258811 -6.467002 0.094608  
H O -1.037162 -5.438446 0.787385  
H O -1.108950 -2.708605 2.003009  
H O -0.470754 -1.078909 1.654208  
H O -2.033228 0.103941 -0.127767  
H O -2.893739 -0.944244 1.046943  
H O -3.370711 -0.958938 -1.991524  
H O -3.844135 -2.896093 -0.550170  
H O -5.905566 -1.078463 -0.229362  
H O 4.478399 -3.911762 -1.353895  
H O 5.582282 -0.569020 -2.041210  
H O 5.905566 -1.475593 0.277986  
H O 4.506687 -1.320426 1.346177  
H O 5.379911 0.133015 0.817314  
H O 3.534360 1.527694 0.968952  
H O 3.811908 1.975297 -0.713077  
H O 1.358557 2.386767 -1.020980  
H O 1.056572 1.905673 0.644987  
H O 2.489733 3.803498 1.457081  
H O 2.795929 4.286515 -0.205775  
H O 0.029477 4.205434 1.118471  
H O 0.339414 4.697476 -0.539773  
H O 1.441821 6.127414 1.959108  
H O 0.108480 6.703362 0.945266  
H O 1.751630 6.624172 0.288603

Free Energy (PCM/B3LYP/6-31G\*) = -1832.835382  
Number of imaginary frequencies = 0

### 3-SR-c3

B3LYP/6-31G\* geometry

O O 1.885236 -1.335576 0.453907  
C O 1.698004 -3.580354 -0.341354  
C O 3.895282 -2.477831 -0.510282  
C O 3.002563 -3.618692 -1.073316  
C O 3.032306 -1.181456 -0.462080  
C O 1.274904 -2.513480 0.362655  
C O -0.031946 -2.790848 1.068875  
N O -0.390736 -4.088102 0.467345  
C O 0.740124 -4.661672 -0.161217  
O O -1.110456 -4.930746 1.332502  
C O -2.301548 -5.408604 0.681807  
C O -1.110503 -1.715028 0.921794  
C O -2.104530 0.242739 -0.825659  
C O -3.252737 0.656752 0.124459  
C O -4.661964 0.467277 -0.481357  
O O -3.082917 2.018431 0.441126  
O O -5.419645 1.424751 -0.523437

|   |   |           |           |           |
|---|---|-----------|-----------|-----------|
| O | 0 | -5.015657 | -0.728856 | -0.905520 |
| O | 0 | 0.846845  | -5.840659 | -0.486397 |
| O | 0 | 3.664583  | -4.872696 | -0.930262 |
| O | 0 | 4.927452  | -2.179938 | -1.455003 |
| C | 0 | 4.503219  | -2.839999 | 0.849380  |
| C | 0 | 3.769454  | 0.078645  | -0.031280 |
| C | 0 | 2.956021  | 1.364303  | -0.237657 |
| C | 0 | 3.729893  | 2.624676  | 0.169195  |
| C | 0 | 2.938093  | 3.921013  | -0.044064 |
| C | 0 | 3.721126  | 5.176899  | 0.352782  |
| S | 0 | -1.650152 | -1.539478 | -0.841143 |
| O | 0 | -2.981186 | -2.318769 | -0.971469 |
| H | 0 | 2.851197  | -3.405738 | -2.143421 |
| H | 0 | 2.598599  | -1.035787 | -1.459754 |
| H | 0 | 0.149023  | -2.932130 | 2.143421  |
| H | 0 | -2.841953 | -5.955407 | 1.458087  |
| H | 0 | -2.045251 | -6.084973 | -0.139432 |
| H | 0 | -2.901426 | -4.573861 | 0.309108  |
| H | 0 | -2.000738 | -1.985193 | 1.495657  |
| H | 0 | -0.723423 | -0.756227 | 1.277133  |
| H | 0 | -2.325744 | 0.497639  | -1.866358 |
| H | 0 | -1.196679 | 0.779446  | -0.535606 |
| H | 0 | -3.214140 | 0.053178  | 1.043821  |
| H | 0 | -3.942823 | 2.432479  | 0.214729  |
| H | 0 | -4.252180 | -1.400556 | -0.861278 |
| H | 0 | 2.975001  | -5.559669 | -1.000340 |
| H | 0 | 5.419645  | -3.005901 | -1.598846 |
| H | 0 | 5.075446  | -3.766698 | 0.759263  |
| H | 0 | 3.737371  | -2.994241 | 1.615621  |
| H | 0 | 5.174971  | -2.044682 | 1.182072  |
| H | 0 | 4.057553  | -0.015023 | 1.022729  |
| H | 0 | 4.695699  | 0.125641  | -0.614106 |
| H | 0 | 2.022841  | 1.306127  | 0.337874  |
| H | 0 | 2.664958  | 1.442025  | -1.295283 |
| H | 0 | 4.021605  | 2.547689  | 1.227079  |
| H | 0 | 4.667957  | 2.674384  | -0.403374 |
| H | 0 | 2.003761  | 3.873822  | 0.533157  |
| H | 0 | 2.641138  | 3.993433  | -1.099987 |
| H | 0 | 4.005216  | 5.148124  | 1.412107  |
| H | 0 | 3.128991  | 6.084973  | 0.190790  |
| H | 0 | 4.642862  | 5.270003  | -0.234846 |

Free Energy (PCM/B3LYP/6-31G\*) = -1832.834971  
Number of imaginary frequencies = 0

### 3-SR-c4

B3LYP/6-31G\* geometry

|   |   |           |           |           |
|---|---|-----------|-----------|-----------|
| O | 0 | 1.862691  | -0.981295 | 0.053452  |
| C | 0 | 2.320607  | -3.252893 | -0.523665 |
| C | 0 | 4.236393  | -1.766494 | -0.083736 |
| C | 0 | 3.783168  | -3.076475 | -0.787478 |
| C | 0 | 3.209790  | -0.653073 | -0.450638 |
| C | 0 | 1.518229  | -2.254460 | -0.107383 |
| C | 0 | 0.113056  | -2.740439 | 0.160546  |
| N | 0 | 0.198294  | -4.118273 | -0.359906 |
| C | 0 | 1.553817  | -4.488290 | -0.527955 |
| O | 0 | -0.599326 | -5.035941 | 0.357706  |
| C | 0 | -1.337119 | -5.867075 | -0.552930 |
| C | 0 | -0.957865 | -1.882467 | -0.514557 |
| C | 0 | -3.573878 | -1.019447 | -0.730642 |
| C | 0 | -4.935678 | -0.892735 | -0.029405 |
| C | 0 | -5.768461 | 0.176567  | -0.754866 |
| O | 0 | -4.809115 | -0.493717 | 1.324303  |
| O | 0 | -6.104922 | 0.074889  | -1.914704 |
| O | 0 | -6.079702 | 1.235379  | -0.000603 |
| O | 0 | 1.960601  | -5.640455 | -0.658716 |
| O | 0 | 4.553019  | -4.178394 | -0.313892 |
| O | 0 | 5.464736  | -1.320717 | -0.665944 |
| C | 0 | 4.397871  | -1.952151 | 1.429024  |
| C | 0 | 3.542603  | 0.739465  | 0.066866  |
| C | 0 | 2.635735  | 1.837565  | -0.506941 |
| C | 0 | 3.005918  | 3.236453  | 0.001777  |
| C | 0 | 2.113867  | 4.346189  | -0.569269 |
| C | 0 | 2.487700  | 5.742040  | -0.060012 |
| S | 0 | -2.638368 | -2.419354 | 0.021707  |
| O | 0 | -2.700937 | -2.175035 | 1.541866  |
| H | 0 | 3.968060  | -2.939094 | -1.864733 |
| H | 0 | 3.121600  | -0.630888 | -1.544410 |

|   |   |           |           |           |
|---|---|-----------|-----------|-----------|
| H | 0 | -0.076206 | -2.774165 | 1.242112  |
| H | 0 | -1.942824 | -6.511456 | 0.088338  |
| H | 0 | -0.657588 | -6.473723 | -1.157399 |
| H | 0 | -1.984997 | -5.264091 | -1.197077 |
| H | 0 | -0.836317 | -0.836802 | -0.216352 |
| H | 0 | -0.912396 | -1.970429 | -1.604230 |
| H | 0 | -3.700764 | -1.234810 | -1.794805 |
| H | 0 | -2.998195 | -0.098705 | -0.596554 |
| H | 0 | -5.490179 | -1.838649 | -0.118261 |
| H | 0 | -4.060313 | -1.008684 | 1.712162  |
| H | 0 | -5.678000 | 1.076172  | 0.884904  |
| H | 0 | 4.035379  | -4.982755 | -0.508844 |
| H | 0 | 6.104922  | -2.043624 | -0.553074 |
| H | 0 | 5.109919  | -2.757614 | 1.625382  |
| H | 0 | 3.453545  | -2.216013 | 1.914704  |
| H | 0 | 4.777284  | -1.032010 | 1.880436  |
| H | 0 | 3.482916  | 0.741596  | 1.162023  |
| H | 0 | 4.586092  | 0.941692  | -0.197944 |
| H | 0 | 2.697926  | 1.820995  | -1.604799 |
| H | 0 | 1.590166  | 1.621369  | -0.252064 |
| H | 0 | 2.945982  | 3.252292  | 1.100123  |
| H | 0 | 4.055550  | 3.449136  | -0.249852 |
| H | 0 | 1.065412  | 4.132676  | -0.317057 |
| H | 0 | 2.173350  | 4.328582  | -1.666831 |
| H | 0 | 2.404509  | 5.800231  | 1.032397  |
| H | 0 | 1.833274  | 6.511456  | -0.485729 |
| H | 0 | 3.520698  | 5.997357  | -0.327296 |

Free Energy (PCM/B3LYP/6-31G\*) = -1832.834744  
Number of imaginary frequencies = 0

### 3-SR-c5

B3LYP/6-31G\* geometry

|   |   |           |           |           |
|---|---|-----------|-----------|-----------|
| O | 0 | 1.190808  | -1.139298 | 0.165012  |
| C | 0 | 1.450322  | -3.466119 | -0.320057 |
| C | 0 | 3.472195  | -2.176181 | 0.236387  |
| C | 0 | 2.936680  | -3.438533 | -0.491550 |
| C | 0 | 2.603410  | -0.965097 | -0.217987 |
| C | 0 | 0.726274  | -2.374702 | -0.011652 |
| C | 0 | -0.736891 | -2.701718 | 0.168941  |
| N | 0 | -0.674806 | -4.173607 | 0.124330  |
| C | 0 | 0.566436  | -4.627246 | -0.351740 |
| O | 0 | -1.817535 | -4.844250 | -0.320560 |
| C | 0 | -2.424474 | -5.570784 | 0.766036  |
| C | 0 | -1.592013 | -2.057499 | -0.928794 |
| C | 0 | -4.015925 | -0.688484 | -1.243441 |
| C | 0 | -3.677959 | 0.540842  | -0.365827 |
| C | 0 | -4.724731 | 0.791100  | 0.740466  |
| O | 0 | -3.615962 | 1.679119  | -1.192140 |
| O | 0 | -5.320575 | 1.856353  | 0.769076  |
| O | 0 | -4.928244 | -0.158046 | 1.633435  |
| O | 0 | 0.835670  | -5.785725 | -0.658907 |
| O | 0 | 3.567915  | -4.603101 | 0.032914  |
| O | 0 | 4.783351  | -1.875584 | -0.250688 |
| C | 0 | 3.495665  | -2.355225 | 1.758650  |
| C | 0 | 3.038454  | 0.389678  | 0.324131  |
| C | 0 | 2.307627  | 1.571393  | -0.329139 |
| C | 0 | 2.777601  | 2.928614  | 0.209087  |
| C | 0 | 2.061993  | 4.120330  | -0.439608 |
| C | 0 | 2.536956  | 5.473907  | 0.098755  |
| S | 0 | -3.407867 | -2.312622 | -0.615206 |
| O | 0 | -3.581468 | -2.260227 | 0.924833  |
| H | 0 | 3.200723  | -3.328364 | -1.555268 |
| H | 0 | 2.616276  | -0.945007 | -1.315200 |
| H | 0 | -1.103890 | -2.364912 | 1.145169  |
| H | 0 | -1.722368 | -6.304118 | 1.171929  |
| H | 0 | -3.280736 | -6.078259 | 0.316470  |
| H | 0 | -2.763405 | -4.884289 | 1.546966  |
| H | 0 | -1.377408 | -0.986366 | -0.952658 |
| H | 0 | -1.390463 | -2.489177 | -1.912860 |
| H | 0 | -5.094208 | -0.806167 | -1.383920 |
| H | 0 | -3.561146 | -0.557107 | -2.229875 |
| H | 0 | -2.709280 | 0.391525  | 0.133989  |
| H | 0 | -4.287174 | 2.290492  | -0.821764 |
| H | 0 | -4.368076 | -0.980702 | 1.437565  |
| H | 0 | 3.052694  | -5.364351 | -0.292493 |
| H | 0 | 5.320575  | -2.673053 | -0.106749 |
| H | 0 | 4.087241  | -3.237522 | 2.016209  |

H O 2.491907 -2.491960 2.172485  
H O 3.950706 -1.480377 2.229875  
H O 2.883944 0.411217 1.409754  
H O 4.116719 0.476618 0.151400  
H O 1.226611 1.469166 -0.168290  
H O 2.464571 1.536959 -1.417106  
H O 2.623153 2.962098 1.297811  
H O 3.862014 3.026635 0.051406  
H O 0.978811 4.022115 -0.280012  
H O 2.214643 4.084735 -1.527675  
H O 2.364671 5.552428 1.179446  
H O 2.008866 6.304118 -0.384317  
H O 3.610909 5.614274 -0.076198  
Free Energy (PCM/B3LYP/6-31G\*) = -1832.834363  
Number of imaginary frequencies = 0

### 3-SR-c6

B3LYP/6-31G\* geometry  
O O -1.435624 -0.731309 1.184046  
C O -2.203971 -2.770291 0.174947  
C O -3.632105 -1.691516 1.872170  
C O -3.599238 -2.734237 0.717488  
C O -2.840765 -0.399902 1.526717  
C O -1.287728 -1.810483 0.420687  
C O 0.035873 -2.108544 -0.243370  
N O -0.207471 -3.475036 -0.731049  
C O -1.596436 -3.762479 -0.711142  
C O 0.456628 -3.762715 -1.942148  
O O 1.116492 -5.035664 -1.854310  
C O 1.225035 -1.982654 0.711111  
C O 3.956185 -1.547941 1.100932  
C O 3.889660 -0.039722 1.443717  
C O 4.777476 0.829375 0.527244  
O O 4.315501 0.130991 2.774588  
O O 5.661051 1.509717 1.024610  
O O 4.535633 0.822025 -0.768944  
O O -2.124994 -4.682616 -1.319940  
O O -4.561151 -2.389805 -0.285872  
O O -3.021085 -2.293230 3.023628  
C O -5.061277 -1.367610 2.299662  
C O -3.407137 0.499353 0.426493  
C O -2.608002 1.795366 0.227950  
C O -3.222611 2.710409 -0.838827  
C O -2.433699 4.008710 -1.051686  
C O -3.049265 4.920195 -2.118420  
S O 2.810550 -2.124674 -0.222946  
O O 2.763946 -0.998786 -1.284391  
H O -3.859361 -3.704493 1.162593  
H O -2.729974 0.165381 2.455530  
H O 0.184709 -1.433450 -1.097392  
H O 1.851427 -5.041830 -1.042837  
H O 1.621116 -5.154067 -2.815964  
H O 0.388177 -5.838679 -1.713054  
H O 1.193062 -1.009268 1.207098  
H O 1.220674 -2.782147 1.457438  
H O 3.700150 -2.124034 1.994829  
H O 4.957884 -1.849110 0.781040  
H O 2.858404 0.325526 1.333577  
H O 5.076724 0.746159 2.712880  
H O 3.792587 0.173910 -1.009353  
H O -4.454765 -3.033818 -1.006160  
H O -2.080828 -2.446015 2.833345  
H O -5.524999 -2.276657 2.695496  
H O -5.661051 -1.010965 1.461836  
H O -5.057727 -0.611692 3.091693  
H O -3.470356 -0.062416 -0.511991  
H O -4.437259 0.752437 0.703925  
H O -1.575312 1.552196 -0.051850  
H O -2.550672 2.337098 1.183489  
H O -3.287483 2.164780 -1.791896  
H O -4.257136 2.956837 -0.557188  
H O -1.400202 3.761455 -1.332806  
H O -2.368757 4.552741 -0.098613  
H O -3.094153 4.415849 -3.091693  
H O -2.464645 5.838679 -2.245202  
H O -4.072359 5.210259 -1.848492  
Free Energy (PCM/B3LYP/6-31G\*) = -1832.834272

Number of imaginary frequencies = 0

### 3-SR-c7

B3LYP/6-31G\* geometry  
O O -1.436954 -0.717340 0.823404  
C O -2.182012 -2.777407 -0.157265  
C O -3.601955 -1.723644 1.557116  
C O -3.567153 -2.763225 0.405965  
C O -2.832511 -0.418875 1.200840  
C O -1.277301 -1.806415 0.084823  
C O 0.051187 -2.097193 -0.572782  
N O -0.172353 -3.473536 -1.042113  
C O -1.561160 -3.775545 -1.021489  
O O 0.489493 -3.760294 -2.256580  
C O 1.171432 -5.020166 -2.161121  
C O 1.233835 -1.944691 0.385949  
C O 3.960967 -1.492976 0.790346  
C O 3.885643 0.017017 1.123529  
C O 4.774075 0.884614 0.206178  
O O 4.304195 0.198275 2.455450  
O O 5.651956 1.572166 0.703936  
O O 4.539066 0.868025 -1.091073  
O O -2.072927 -4.715202 -1.616201  
O O -4.558541 -2.429574 -0.571127  
O O -2.883376 -2.385630 2.609360  
C O -5.033046 -1.421213 2.007226  
C O -3.442842 0.480422 0.121556  
C O -2.666573 1.787831 -0.090844  
C O -3.313941 2.695756 -1.144357  
C O -2.546275 4.004338 -1.371115  
C O -3.193027 4.907604 -2.426368  
S O 2.825392 -2.082967 -0.536365  
O O 2.780089 -0.962863 -1.604606  
H O -3.801727 -3.738803 0.853893  
H O -2.711792 0.154410 2.125882  
H O 0.196110 -1.432947 -1.435724  
H O 1.914918 -5.004819 -1.357435  
H O 1.668425 -5.141868 -3.126482  
H O 0.458825 -5.834074 -2.002757  
H O 1.189198 -0.964893 0.868148  
H O 1.232606 -2.733555 1.143465  
H O 3.702466 -2.064562 1.686385  
H O 4.965913 -1.791229 0.477977  
H O 2.853215 0.376670 1.006372  
H O 5.063391 0.815899 2.393204  
H O 3.800456 0.214120 -1.331349  
H O -4.446936 -3.057531 -1.304198  
H O -2.926437 -1.821071 3.398907  
H O -5.483569 -2.341851 2.391096  
H O -5.651956 -1.049642 1.188955  
H O -5.033100 -0.676577 2.812435  
H O -3.520696 -0.078659 -0.817448  
H O -4.469024 0.718066 0.425542  
H O -1.636436 1.559077 -0.391060  
H O -2.597946 2.329425 0.864161  
H O -3.389894 2.150067 -2.096583  
H O -4.346058 2.928306 -0.842741  
H O -1.514920 3.770663 -1.671108  
H O -2.471087 4.549233 -0.419293  
H O -3.248232 4.402845 -3.398907  
H O -2.623446 5.834074 -2.563181  
H O -4.215096 5.183520 -2.138300  
Free Energy (PCM/B3LYP/6-31G\*) = -1832.834108  
Number of imaginary frequencies = 0

### 3-SR-c8

B3LYP/6-31G\* geometry  
O O -1.437410 -0.714126 1.017257  
C O -2.177245 -2.779710 0.045745  
C O -3.599493 -1.717756 1.757101  
C O -3.563009 -2.763760 0.605738  
C O -2.832746 -0.418097 1.403107  
C O -1.275485 -1.804427 0.282319  
C O 0.053666 -2.094680 -0.374352  
N O -0.166278 -3.473559 -0.838188  
C O -1.554216 -3.779548 -0.814535  
O O 0.494214 -3.762407 -2.053010

|     |           |           |           |
|-----|-----------|-----------|-----------|
| C 0 | 1.180923  | -5.019407 | -1.954477 |
| C 0 | 1.235238  | -1.935488 | 0.584707  |
| C 0 | 3.962492  | -1.487089 | 0.992623  |
| C 0 | 3.887695  | 0.022739  | 1.326376  |
| C 0 | 4.775035  | 0.891192  | 0.408731  |
| O 0 | 4.308001  | 0.202808  | 2.657915  |
| O 0 | 5.652145  | 1.579813  | 0.906403  |
| O 0 | 4.539849  | 0.874643  | -0.888472 |
| O 0 | -2.064034 | -4.723488 | -1.404312 |
| O 0 | -4.553757 | -2.441219 | -0.377034 |
| O 0 | -2.845003 | -2.255935 | 2.853629  |
| C 0 | -5.031258 | -1.413154 | 2.204455  |
| C 0 | -3.449407 | 0.478839  | 0.327218  |
| C 0 | -2.674094 | 1.786546  | 0.113339  |
| C 0 | -3.325262 | 2.695361  | -0.937012 |
| C 0 | -2.558474 | 4.004255  | -1.164871 |
| C 0 | -3.208622 | 4.908532  | -2.217166 |
| S 0 | 2.827953  | -2.077479 | -0.334645 |
| O 0 | 2.786031  | -0.959787 | -1.405461 |
| H 0 | -3.799160 | -3.744240 | 1.047795  |
| H 0 | -2.709739 | 0.141096  | 2.334104  |
| H 0 | 0.197151  | -1.433651 | -1.239938 |
| H 0 | 1.926719  | -4.998198 | -1.153067 |
| H 0 | 1.675581  | -5.143152 | -2.920779 |
| H 0 | 0.471734  | -5.835267 | -1.790893 |
| H 0 | 1.188870  | -0.953102 | 1.061415  |
| H 0 | 1.233770  | -2.719986 | 1.346740  |
| H 0 | 3.703335  | -2.058825 | 1.888387  |
| H 0 | 4.967572  | -1.785521 | 0.680818  |
| H 0 | 2.855136  | 0.382559  | 1.210752  |
| H 0 | 5.065402  | 0.822613  | 2.595460  |
| H 0 | 3.802488  | 0.219463  | -1.129269 |
| H 0 | -4.434544 | -3.068910 | -1.109406 |
| H 0 | -3.325080 | -3.030719 | 3.190096  |
| H 0 | -5.491233 | -2.329809 | 2.592656  |
| H 0 | -5.652145 | -1.054381 | 1.381984  |
| H 0 | -5.025899 | -0.668022 | 3.006611  |
| H 0 | -3.530881 | -0.079030 | -0.612257 |
| H 0 | -4.474092 | 0.716582  | 0.635724  |
| H 0 | -1.644982 | 1.558415  | -0.190713 |
| H 0 | -2.602293 | 2.326908  | 1.068725  |
| H 0 | -3.404320 | 2.150701  | -1.889588 |
| H 0 | -4.356390 | 2.927474  | -0.631691 |
| H 0 | -1.528037 | 3.771008  | -1.468339 |
| H 0 | -2.480350 | 4.548170  | -0.212735 |
| H 0 | -3.266688 | 4.404838  | -3.190096 |
| H 0 | -2.639645 | 5.835267  | -2.354700 |
| H 0 | -4.229862 | 5.183938  | -1.925686 |

Free Energy (PCM/B3LYP/6-31G\*) = -1832.834093  
Number of imaginary frequencies = 0

**3-SS-c1**

B3LYP/6-31G\* geometry

|     |           |           |           |
|-----|-----------|-----------|-----------|
| O 0 | -1.408477 | -1.347469 | 0.648285  |
| C 0 | -3.503740 | -0.889860 | -0.398795 |
| C 0 | -2.500629 | -3.119493 | -0.732123 |
| C 0 | -3.516876 | -2.087047 | -1.295740 |
| C 0 | -1.183886 | -2.353132 | -0.404362 |
| C 0 | -2.511416 | -0.630048 | 0.474035  |
| C 0 | -2.780106 | 0.625606  | 1.270732  |
| N 0 | -3.973591 | 1.141254  | 0.574391  |
| C 0 | -4.530452 | 0.126426  | -0.247403 |
| O 0 | -4.885165 | 1.790146  | 1.430405  |
| C 0 | -5.224443 | 3.083552  | 0.908849  |
| C 0 | -1.612354 | 1.615110  | 1.344748  |
| C 0 | 0.315102  | 3.259365  | 0.236277  |
| C 0 | 1.314230  | 3.435002  | -0.931726 |
| C 0 | 2.336346  | 2.277918  | -1.008789 |
| O 0 | 2.016798  | 4.641144  | -0.748263 |
| O 0 | 3.529012  | 2.533951  | -0.952587 |
| O 0 | 1.884627  | 1.044921  | -1.136491 |
| O 0 | -5.662383 | 0.150958  | -0.722402 |
| O 0 | -4.811386 | -2.676525 | -1.394593 |
| O 0 | -2.133769 | -4.033101 | -1.770295 |
| C 0 | -3.063901 | -3.879018 | 0.474396  |
| C 0 | -0.017171 | -3.216618 | 0.053848  |
| C 0 | 1.300271  | -2.439039 | 0.188003  |

|     |           |           |           |
|-----|-----------|-----------|-----------|
| C 0 | 2.478200  | -3.334098 | 0.592467  |
| C 0 | 3.798487  | -2.567816 | 0.744869  |
| C 0 | 4.975937  | -3.466957 | 1.135377  |
| S 0 | -1.197541 | 2.335806  | -0.299605 |
| O 0 | -0.698811 | 1.173062  | -1.192788 |
| H 0 | -3.163875 | -1.812972 | -2.302678 |
| H 0 | -0.896852 | -1.781941 | -1.296042 |
| H 0 | -3.052682 | 0.365623  | 2.302678  |
| H 0 | -4.335912 | 3.715108  | 0.804701  |
| H 0 | -5.735138 | 2.992717  | -0.054172 |
| H 0 | -5.902323 | 3.513326  | 1.650004  |
| H 0 | -0.724719 | 1.111777  | 1.739555  |
| H 0 | -1.865283 | 2.461361  | 1.991488  |
| H 0 | 0.772175  | 2.762360  | 1.096060  |
| H 0 | -0.035456 | 4.248617  | 0.541888  |
| H 0 | 0.767987  | 3.461609  | -1.887099 |
| H 0 | 2.961058  | 4.377535  | -0.738665 |
| H 0 | 0.868665  | 1.014936  | -1.170437 |
| H 0 | -5.445425 | -1.938154 | -1.462997 |
| H 0 | -2.957448 | -4.444075 | -2.082925 |
| H 0 | -3.998602 | -4.371219 | 0.193920  |
| H 0 | -3.276215 | -3.212412 | 1.315849  |
| H 0 | -2.352889 | -4.641144 | 0.803512  |
| H 0 | -0.268081 | -3.688819 | 1.011541  |
| H 0 | 0.096007  | -4.021875 | -0.680047 |
| H 0 | 1.178820  | -1.638553 | 0.928985  |
| H 0 | 1.530154  | -1.942123 | -0.765259 |
| H 0 | 2.242715  | -3.841621 | 1.539822  |
| H 0 | 2.604576  | -4.129974 | -0.156530 |
| H 0 | 3.672980  | -1.779402 | 1.500557  |
| H 0 | 4.027861  | -2.051427 | -0.197981 |
| H 0 | 5.148791  | -4.243129 | 0.379474  |
| H 0 | 4.788462  | -3.971987 | 2.091214  |
| H 0 | 5.902323  | -2.890254 | 1.239004  |

Free Energy (PCM/B3LYP/6-31G\*) = -1832.836103  
Number of imaginary frequencies = 0

**3-SS-c2**

B3LYP/6-31G\* geometry

|     |           |           |           |
|-----|-----------|-----------|-----------|
| O 0 | -0.079311 | -1.491702 | -0.732081 |
| C 0 | -0.481655 | 0.570268  | 0.433425  |
| C 0 | 0.128055  | -1.416360 | 1.752608  |
| C 0 | 0.053238  | 0.139083  | 1.762376  |
| C 0 | 0.719301  | -1.963263 | 0.423430  |
| C 0 | -0.514852 | -0.242578 | -0.644751 |
| C 0 | -1.221382 | 0.400988  | -1.814240 |
| N 0 | -1.695972 | 1.649881  | -1.199418 |
| C 0 | -1.065106 | 1.855696  | 0.055723  |
| O 0 | -1.686211 | 2.749502  | -2.078987 |
| C 0 | -2.957460 | 3.415327  | -2.057904 |
| C 0 | -2.342925 | -0.450374 | -2.422083 |
| C 0 | -4.762399 | -1.783838 | -2.347875 |
| C 0 | -5.365111 | -2.991610 | -1.623062 |
| C 0 | -6.186512 | -2.601278 | -0.379177 |
| O 0 | -4.405313 | -3.987310 | -1.293867 |
| O 0 | -6.825633 | -1.574498 | -0.287992 |
| O 0 | -6.172649 | -3.531219 | 0.582440  |
| O 0 | -1.059584 | 2.918294  | 0.661696  |
| O 0 | 1.341393  | 0.699469  | 2.047156  |
| O 0 | -1.198451 | -1.925259 | 1.907059  |
| C 0 | 0.908793  | -1.944758 | 2.955490  |
| C 0 | 2.194323  | -1.675728 | 0.134434  |
| C 0 | 2.705129  | -2.335565 | -1.154403 |
| C 0 | 4.194122  | -2.064191 | -1.404742 |
| C 0 | 4.722416  | -2.706997 | -2.693498 |
| C 0 | 6.208574  | -2.427778 | -2.940933 |
| S 0 | -3.673025 | -0.816908 | -1.199985 |
| O 0 | -3.110801 | -1.878879 | -0.218701 |
| H 0 | -0.653212 | 0.413558  | 2.557990  |
| H 0 | 0.536413  | -3.041093 | 0.413467  |
| H 0 | -0.506761 | 0.634889  | -2.614467 |
| H 0 | -3.765631 | 2.737655  | -2.353142 |
| H 0 | -3.160285 | 3.831857  | -1.067117 |
| H 0 | -2.862086 | 4.222089  | -2.788518 |
| H 0 | -1.946598 | -1.404303 | -2.782776 |
| H 0 | -2.819901 | 0.083432  | -3.250201 |
| H 0 | -4.177461 | -2.134834 | -3.200506 |

H O -5.543080 -1.100220 -2.688560  
H O -6.074165 -3.458862 -2.318102  
H O -3.681993 -3.497866 -0.832575  
H O -5.536773 -4.222089 -0.286069  
H O 1.249132 1.663392 1.965162  
H O -1.742382 -1.747437 1.110648  
H O 0.363701 -1.682868 3.868003  
H O 1.908541 -1.513125 3.014665  
H O 0.986950 -3.036051 2.907107  
H O 2.355818 -0.592881 0.101228  
H O 2.778938 -2.048344 0.983853  
H O 2.120570 -1.973763 -2.009632  
H O 2.535840 -3.421065 -1.100291  
H O 4.362608 -0.977810 -1.446642  
H O 4.781270 -2.430833 -0.549642  
H O 4.134011 -2.341466 -3.547086  
H O 4.556277 -3.792799 -2.650931  
H O 6.825633 -2.813267 -2.119763  
H O 6.400783 -1.350595 -3.021539  
H O 6.555223 -2.898809 -3.868003

Free Energy (PCM/B3LYP/6-31G\*) = -1832.835624  
Number of imaginary frequencies = 0

### 3-SS-c3

B3LYP/6-31G\* geometry

O O 0.890915 -1.363066 -0.686792  
C O 3.023119 -1.408668 0.385225  
C O 1.438429 -3.234984 0.872321  
C O 2.697675 -2.478555 1.378998  
C O 0.389773 -2.166384 0.442240  
C O 2.149430 -0.966313 -0.539557  
C O 2.767085 0.077116 -1.440564  
N O 4.047923 0.310180 -0.747818  
C O 4.293595 -0.734066 0.180317  
O O 5.113010 0.608107 -1.619622  
C O 5.777534 1.808638 -1.198210  
C O 1.925977 1.337272 -1.661828  
C O 0.508483 3.564090 -0.831497  
C O -0.722605 3.685155 0.071127  
C O -0.376057 4.174165 1.490094  
O O -1.500596 2.496448 0.131038  
O O 0.535784 4.933620 1.740888  
O O -1.220169 3.728349 2.428874  
O O 5.383252 -0.978316 0.691385  
O O 3.777147 -3.391895 1.564083  
O O 0.826297 -3.916950 1.971351  
C O 1.772165 -4.222864 -0.251041  
C O -0.968201 -2.710851 0.021582  
C O -2.032900 -1.618574 -0.154851  
C O -3.384993 -2.179304 -0.613771  
C O -4.462079 -1.101636 -0.791586  
C O -5.805890 -1.666606 -1.263817  
S O 1.701349 2.319390 -0.119178  
O O 0.863180 1.458834 0.851063  
H O 2.429717 -2.030869 2.349215  
H O 0.268923 -1.459366 1.272603  
H O 2.970527 -0.357939 -2.428874  
H O 6.233858 1.674524 -0.213095  
H O 6.554159 1.976081 -1.948124  
H O 5.086345 2.657961 -1.179481  
H O 0.938201 1.058709 -2.042193  
H O 2.415118 2.003737 -2.379948  
H O 0.198089 3.252299 -1.830459  
H O 1.041401 4.515387 -0.889924  
H O -1.367441 4.458927 -0.364701  
H O -0.854719 1.798159 0.404856  
H O -1.818415 3.090444 1.977360  
H O 4.589567 -2.852625 1.598004  
H O 1.503326 -4.507109 2.343449  
H O 2.526608 -4.933620 0.095966  
H O 2.169932 -3.718172 -1.136686  
H O 0.875950 -4.778137 -0.539722  
H O -0.856769 -3.273635 -0.913288  
H O -1.287658 -3.424090 0.789004  
H O -1.680386 -0.876132 -0.882621  
H O -2.162857 -1.082650 0.796642  
H O -3.250653 -2.716999 -1.564105

H O -3.735520 -2.927054 0.113014  
H O -4.106402 -0.351218 -1.511827  
H O -4.601869 -0.569389 0.159852  
H O -6.202521 -2.396029 -0.546694  
H O -5.702782 -2.175729 -2.230241  
H O -6.554159 -0.874414 -1.382158  
Free Energy (PCM/B3LYP/6-31G\*) = -1832.835265  
Number of imaginary frequencies = 0

### 3-SS-c4

B3LYP/6-31G\* geometry

O O -2.054372 -1.209845 -0.340612  
C O -1.977450 -3.502235 0.322889  
C O -4.185167 -2.413617 0.187627  
C O -3.387015 -3.590120 0.817679  
C O -3.342148 -1.115924 0.373289  
C O -1.454403 -2.389938 -0.224841  
C O -0.035972 -2.611198 -0.701859  
N O 0.221992 -3.963275 -0.172015  
C O -0.998194 -4.571238 0.209164  
O O 1.045437 -4.738799 -1.017088  
C O 2.029321 -5.446027 -0.240155  
C O 0.911222 -1.521146 -0.193409  
C O 3.085725 0.132013 -0.525485  
C O 4.623042 0.287259 -0.474178  
C O 5.191970 0.037156 0.940818  
O O 4.957899 1.597609 -0.866341  
O O 5.867961 0.904576 1.471576  
O O 4.930287 -1.112831 1.531989  
O O -1.158109 -5.774107 0.403591  
O O -3.999460 -4.832908 0.484188  
O O -5.366797 -2.180783 0.959521  
C O -4.548115 -2.684141 -1.276600  
C O -4.008089 0.169598 -0.097410  
C O -3.238137 1.437673 0.298386  
C O -3.924847 2.721441 -0.184422  
C O -3.167242 3.998228 0.201906  
C O -3.851985 5.277433 -0.290311  
S O 2.585473 -1.593009 -0.962165  
O O 3.472115 -2.513051 -0.091638  
H O -3.421815 -3.448196 1.909551  
H O -3.087778 -1.035426 1.437960  
H O -0.011065 -2.649722 -1.799325  
H O 2.638013 -5.969002 -0.981974  
H O 2.646223 -4.745136 0.326138  
H O 1.545523 -6.170633 0.420300  
H O 1.047652 -1.575890 0.890872  
H O 0.499470 -0.542813 -0.461689  
H O 2.611279 0.422265 0.416531  
H O 2.698702 0.764811 -1.328537  
H O 5.094386 -0.439432 -1.154357  
H O 5.492510 1.948667 -0.123334  
H O 4.358348 -1.717102 0.949380  
H O -3.312534 -5.518439 0.590315  
H O -5.867961 -3.013849 0.959507  
H O -5.114403 -3.616230 -1.346837  
H O -3.661031 -2.784044 -1.909551  
H O -5.164462 -1.870038 -1.666073  
H O -4.129460 0.134188 -1.186866  
H O -5.013497 0.191579 0.336683  
H O -2.221139 1.392389 -0.112136  
H O -3.130660 1.470099 1.392281  
H O -4.037115 2.684286 -1.278186  
H O -4.944629 2.765951 0.225777  
H O -2.146904 3.949469 -0.204379  
H O -3.058857 4.037827 1.295088  
H O -4.862439 5.371296 0.126619  
H O -3.943479 5.281520 -1.383607  
H O -3.287054 6.170633 0.000431

Free Energy (PCM/B3LYP/6-31G\*) = -1832.834698  
Number of imaginary frequencies = 0

### 3-SS-c5

B3LYP/6-31G\* geometry

O O 0.339294 -1.164636 0.336781  
C O -0.998223 -2.823147 -0.747047  
C O 1.395327 -2.708849 -1.324500



C 0 -0.003392 -3.176760 -1.807916  
C 0 1.251695 -1.243051 -0.816605  
C 0 -0.766942 -1.889605 0.195209  
C 0 -1.925467 -1.760253 1.154067  
N 0 -2.744417 -2.913680 0.726973  
C 0 -2.304838 -3.428279 -0.507043  
O 0 -4.124455 -2.813421 0.920593  
C 0 -4.561137 -3.759353 1.912490  
C 0 -2.660158 -0.413078 1.095810  
C 0 -4.255232 1.469755 -0.142685  
C 0 -4.366085 2.498306 -1.292445  
C 0 -3.287238 3.601233 -1.199443  
O 0 -5.634453 3.106319 -1.234021  
O 0 -3.636379 4.770445 -1.148817  
O 0 -2.018102 3.242734 -1.181307  
O 0 -2.898381 -4.263124 -1.183534  
O 0 0.024531 -4.573872 -2.087567  
O 0 2.272462 -2.614596 -2.450667  
C 0 1.982886 -3.650112 -0.266613  
C 0 2.549746 -0.568276 -0.395314  
C 0 2.392725 0.933042 -0.114661  
C 0 3.716012 1.606112 0.270622  
C 0 3.573800 3.106808 0.554852  
C 0 4.898597 3.777711 0.931825  
S 0 -3.175869 0.045173 -0.613113  
O 0 -1.934509 0.658524 -1.306702  
H 0 -0.220951 -2.623092 -2.734800  
H 0 0.769580 -0.660167 -1.611306  
H 0 -1.590088 -1.896363 2.189845  
H 0 -5.636151 -3.590400 2.005439  
H 0 -4.368616 -4.782591 1.577439  
H 0 -4.068977 -3.577940 2.873498  
H 0 -2.007891 0.385806 1.460515  
H 0 -3.567842 -0.459098 1.703046  
H 0 -3.888349 1.924038 0.782170  
H 0 -5.245256 1.042942 0.038142  
H 0 -4.238639 1.989361 -2.260419  
H 0 -5.445119 4.066453 -1.174271  
H 0 -1.907321 2.232984 -1.231879  
H 0 -0.903301 -4.847406 -2.208081  
H 0 2.273219 -3.490109 -2.873498  
H 0 2.034313 -4.666111 -0.666337  
H 0 1.374180 -3.677805 0.642456  
H 0 2.992946 -3.328501 -0.000158  
H 0 2.948142 -1.072996 0.493376  
H 0 3.273188 -0.723319 -1.203176  
H 0 1.659627 1.081542 0.688640  
H 0 1.979319 1.426409 -1.006279  
H 0 4.134204 1.107536 1.157784  
H 0 4.448460 1.457300 -0.536697  
H 0 2.845164 3.253532 1.364772  
H 0 3.150644 3.603581 -0.329785  
H 0 5.636151 3.677976 0.125744  
H 0 5.330105 3.324366 1.833018  
H 0 4.763050 4.847406 1.129058

Free Energy (PCM/B3LYP/6-31G\*) = -1832.834616  
Number of imaginary frequencies = 0

### 3-SS-c6

B3LYP/6-31G\* geometry

O 0 1.723712 -1.178342 -0.147909  
C 0 1.560323 -3.541196 -0.455609  
C 0 3.722066 -2.622033 0.293016  
C 0 3.028550 -3.827726 -0.401687  
C 0 3.177419 -1.318135 -0.363390  
C 0 1.042592 -2.308301 -0.295413  
C 0 -0.469184 -2.331925 -0.307318  
N 0 -0.715653 -3.725439 -0.720659  
C 0 0.464334 -4.492396 -0.549395  
O 0 -1.887421 -4.261452 -0.138324  
C 0 -2.624537 -5.018783 -1.114165  
C 0 -1.076647 -1.290146 -1.248803  
C 0 -3.332809 -0.936027 0.384440  
C 0 -4.711036 -0.240191 0.485172  
C 0 -4.597296 1.297933 0.385709  
O 0 -5.293868 -0.567536 1.723942  
O 0 -5.037056 1.985782 1.293934

O 0 -4.027356 1.820698 -0.682701  
O 0 0.508044 -5.718766 -0.508185  
O 0 3.317888 -5.030605 0.305359  
O 0 5.113843 -2.627590 -0.036946  
C 0 3.531866 -2.647251 1.813711  
C 0 3.814696 -0.024872 0.125193  
C 0 3.422596 1.203187 -0.708815  
C 0 4.068783 2.496151 -0.195774  
C 0 3.693002 3.733300 -1.021272  
C 0 4.333324 5.023235 -0.498110  
S 0 -2.915151 -1.365571 -1.365014  
O 0 -3.304506 -0.134462 -2.216623  
H 0 3.446790 -3.892356 -1.418625  
H 0 3.309537 -1.412365 -1.448822  
H 0 -0.842336 -2.194532 0.715733  
H 0 -2.047475 -5.887935 -1.439262  
H 0 -3.526159 -5.342299 -0.589403  
H 0 -2.892355 -4.394257 -1.971824  
H 0 -0.731061 -1.447356 -2.274289  
H 0 -0.818003 -0.274652 -0.933535  
H 0 -2.536507 -0.326287 0.821196  
H 0 -3.388346 -1.889348 0.915945  
H 0 -5.360970 -0.580863 -0.335381  
H 0 -5.467956 0.297485 2.151366  
H 0 -3.720981 1.105890 -1.338288  
H 0 2.634087 -5.677067 0.047004  
H 0 5.467956 -3.482824 0.260272  
H 0 3.901202 -3.594914 2.213500  
H 0 2.479722 -2.551841 2.099246  
H 0 4.093333 -1.830570 2.274289  
H 0 3.540955 0.136153 1.174949  
H 0 4.900424 -0.166144 0.094935  
H 0 2.330653 1.315660 -0.706215  
H 0 3.715803 1.038376 -1.755771  
H 0 3.775573 2.657622 0.852195  
H 0 5.162822 2.380503 -0.192346  
H 0 2.599359 3.844058 -1.028675  
H 0 3.990797 3.574386 -2.067394  
H 0 5.428249 4.954811 -0.510517  
H 0 4.026054 5.226227 0.535363  
H 0 4.046235 5.887935 -1.107484

Free Energy (PCM/B3LYP/6-31G\*) = -1832.834481  
Number of imaginary frequencies = 0

### 3-SS-c7

B3LYP/6-31G\* geometry

O 0 -0.161245 -1.591339 -0.753021  
C 0 -0.797516 -0.015306 0.947310  
C 0 -0.130496 -2.283030 1.647832  
C 0 -0.322342 -0.812255 2.122049  
C 0 0.585923 -2.361171 0.268826  
C 0 -0.697451 -0.455843 -0.325324  
C 0 -1.327679 0.503873 -1.307381  
N 0 -1.588127 1.651415 -0.418810  
C 0 -1.479872 1.283263 0.940592  
O 0 -2.671016 2.468356 -0.761710  
C 0 -2.210061 3.781167 -1.121599  
C 0 -2.576154 -0.044348 -2.013717  
C 0 -5.149727 -1.060697 -2.077606  
C 0 -5.809084 -2.419578 -1.821401  
C 0 -6.411160 -2.540971 -0.408238  
O 0 -4.953658 -3.521613 -2.094685  
O 0 -6.890964 -1.609479 0.202487  
O 0 -6.403973 -3.790749 0.068896  
O 0 -1.859669 1.965191 1.882232  
O 0 0.905260 -0.309496 2.666194  
O 0 -1.418012 -2.888926 1.533461  
C 0 0.612484 -3.113763 2.694214  
C 0 2.054511 -1.935457 0.207548  
C 0 2.692876 -2.146815 -1.172982  
C 0 4.176544 -1.758164 -1.203777  
C 0 4.830227 -1.962302 -2.576530  
C 0 6.310635 -1.568150 -2.603373  
S 0 -3.806242 -0.748125 -0.837865  
O 0 -3.292916 -2.164019 -0.461391  
H 0 -1.094565 -0.829482 2.903141  
H 0 0.478378 -3.390213 -0.084557

H O -0.611962 0.781429 -2.090927  
H O -1.717738 4.261987 -0.271221  
H O -1.527895 3.739152 -1.977143  
H O -3.114129 4.331527 -1.391644  
H O -2.295620 -0.846388 -2.702968  
H O -3.077559 0.758711 -2.559826  
H O -4.725133 -1.053215 -3.083530  
H O -5.869521 -0.246504 -1.970565  
H O -6.653370 -2.499554 -2.517876  
H O -4.126302 -3.329678 -1.590670  
H O -5.907245 -4.331527 -0.586890  
H O 0.742472 0.610289 2.932559  
H O -1.950684 -2.473293 0.821364  
H O -0.005404 -3.171702 3.596031  
H O 1.573074 -2.672672 2.961302  
H O 0.770832 -4.132378 2.324336  
H O 2.146091 -0.889056 0.518336  
H O 2.604988 -2.526187 0.949173  
H O 2.147894 -1.562031 -1.924645  
H O 2.586242 -3.202055 -1.464691  
H O 4.282658 -0.704542 -0.905363  
H O 4.723872 -2.344789 -0.450981  
H O 4.281598 -1.377506 -3.328519  
H O 4.726055 -3.015522 -2.873505  
H O 6.890964 -2.161133 -1.885524  
H O 6.443122 -0.510726 -2.342327  
H O 6.748595 -1.724113 -3.596031  
Free Energy (PCM/B3LYP/6-31G\*) = -1832.834198  
Number of imaginary frequencies = 0

#### 4-3E-c1

B3LYP/6-31G\* geometry  
O O 2.074472 -1.399076 -0.195201  
C O 2.909888 -3.611922 -0.603416  
C O 4.523813 -1.873430 0.039872  
C O 4.353168 -3.240938 -0.676520  
C O 3.424753 -0.913306 -0.510442  
C O 1.919921 -2.719620 -0.363188  
C O 0.631473 -3.408976 -0.290178  
N O 0.954151 -4.766122 -0.515643  
C O 2.323181 -4.946336 -0.657441  
S O -1.020443 -1.245922 0.201606  
C O -2.808864 -1.361153 0.596414  
C O -3.720943 -1.604262 -0.621647  
C O -5.184761 -1.491785 -0.194671  
O O -3.511262 -2.872351 -1.204131  
O O -5.940022 -2.444385 -0.202481  
O O -5.520630 -0.258167 0.196627  
O O 2.909969 -6.030178 -0.778854  
O O 5.195263 -4.225897 -0.078147  
O O 5.759364 -1.278055 -0.372706  
C O 3.504645 0.519927 -0.000774  
C O 2.568617 1.487841 -0.738405  
C O 2.686531 2.929113 -0.226608  
C O 1.766147 3.913528 -0.959437  
C O 1.890723 5.351638 -0.445512  
C O -0.613191 -2.935608 -0.070737  
C O 4.483690 -2.012462 1.565543  
H O 4.667822 -3.088509 -1.722020  
H O 3.503900 -0.920697 -1.605833  
H O 0.306768 -5.532300 -0.392877  
H O -3.044813 -0.395271 1.051077  
H O -2.961617 -2.140872 1.348126  
H O -3.524097 -0.829229 -1.372416  
H O -4.284242 -3.414466 -0.952810  
H O -6.457672 -0.268658 0.475048  
H O 4.805229 -5.090271 -0.313824  
H O 6.457672 -1.922464 -0.167146  
H O 3.280044 0.531505 1.072931  
H O 4.543302 0.848541 -0.115166  
H O 1.530363 1.147200 -0.635028  
H O 2.798112 1.463688 -1.813779  
H O 2.458457 2.952892 0.849436  
H O 3.729246 3.266045 -0.324827  
H O 0.724313 3.577471 -0.859640  
H O 1.993166 3.888524 -2.034766  
H O 1.223481 6.030178 -0.989502

H O 2.915353 5.725878 -0.562684  
H O 1.635147 5.415183 0.619593  
H O -1.458937 -3.614112 -0.084439  
H O 3.511549 -2.368991 1.919072  
H O 4.693188 -1.047784 2.034766  
H O 5.241970 -2.730576 1.888213  
Free Energy (PCM/B3LYP/6-31G\*) = -1642.022747  
Number of imaginary frequencies = 0

#### 4-3E-c2

B3LYP/6-31G\* geometry  
O O 1.257502 -1.417736 -0.483605  
C O 2.414817 -3.511639 -0.673993  
C O 3.582438 -1.647146 0.422680  
C O 3.770770 -2.990682 -0.333439  
C O 2.578737 -0.780739 -0.398929  
C O 1.304452 -2.737379 -0.710950  
C O 0.132639 -3.557364 -1.020374  
N O 0.652578 -4.863934 -1.153659  
C O 2.018419 -4.895805 -0.907996  
S O -1.816214 -1.595917 -0.988724  
C O -3.567050 -1.858108 -1.480528  
C O -4.457296 -2.519975 -0.417442  
C O -4.433620 -1.770052 0.911925  
O O -4.087540 -3.863132 -0.198943  
O O -4.140690 -2.312253 1.959832  
O O -4.776330 -0.483664 0.791006  
O O 2.732292 -5.907087 -0.873021  
O O 4.519518 -3.909892 0.461185  
O O 4.809365 -0.909401 0.381662  
C O 2.352709 0.626739 0.138339  
C O 1.557708 1.531196 -0.814006  
C O 1.358164 2.945576 -0.254653  
C O 0.562229 3.864731 -1.189947  
C O 0.365119 5.274935 -0.624128  
C O -1.166014 -3.221601 -1.169030  
C O 3.137396 -1.859132 1.873730  
H O 4.342953 -2.758244 -1.246701  
H O 2.959113 -0.727649 -1.427851  
H O 0.086060 -5.696356 -1.237432  
H O -3.596073 -2.453741 -2.396051  
H O -3.946412 -0.859967 -1.713168  
H O -5.490455 -2.474636 -0.796885  
H O -3.903406 -3.941857 0.757216  
H O -4.739058 -0.071711 1.676606  
H O 4.306281 -4.798460 0.115039  
H O 5.490455 -1.486490 0.766652  
H O 1.837031 0.562188 1.104337  
H O 3.338615 1.064024 0.329982  
H O 0.578871 1.079596 -1.020106  
H O 2.081623 1.591427 -1.779150  
H O 0.842886 2.883165 0.715462  
H O 2.339810 3.398208 -0.049799  
H O -0.418288 3.411371 -1.393639  
H O 1.076527 3.927577 -2.159503  
H O -0.205588 5.907087 -1.314214  
H O 1.329022 5.765957 -0.441079  
H O -0.177678 5.246423 0.328962  
H O -1.900252 -3.988675 -1.390319  
H O 2.154229 -2.335316 1.935465  
H O 3.094015 -0.899932 2.396051  
H O 3.855521 -2.504437 2.386353  
Free Energy (PCM/B3LYP/6-31G\*) = -1642.022506  
Number of imaginary frequencies = 0

#### 4-3E-c3

B3LYP/6-31G\* geometry  
O O 2.165395 -1.399427 -0.588288  
C O 2.909529 -3.669873 -0.814719  
C O 4.411981 -2.071196 0.293690  
C O 4.341695 -3.416607 -0.479624  
C O 3.584085 -1.023689 -0.511226  
C O 1.962647 -2.701820 -0.826437  
C O 0.654848 -3.284742 -1.130242  
N O 0.923036 -4.658558 -1.315454  
C O 2.260234 -4.950451 -1.072123  
S O -0.900272 -0.995402 -1.033661

|     |           |           |           |
|-----|-----------|-----------|-----------|
| C 0 | -2.733239 | -1.017745 | -1.076256 |
| C 0 | -3.381552 | -1.499118 | 0.240404  |
| C 0 | -4.901822 | -1.482351 | 0.084203  |
| O 0 | -3.019762 | -0.697142 | 1.338993  |
| O 0 | -5.609431 | -0.689272 | 0.673834  |
| O 0 | -5.346866 | -2.401130 | -0.780700 |
| O 0 | 2.769997  | -6.077925 | -1.060050 |
| O 0 | 4.908758  | -4.468041 | 0.301126  |
| O 0 | 5.754831  | -1.575591 | 0.252516  |
| C 0 | 3.631270  | 0.397914  | 0.034326  |
| C 0 | 3.049667  | 1.441971  | -0.929480 |
| C 0 | 3.112904  | 2.868069  | -0.368227 |
| C 0 | 2.551803  | 3.924944  | -1.328209 |
| C 0 | 2.612957  | 5.347297  | -0.761717 |
| C 0 | -0.561726 | -2.708872 | -1.236261 |
| C 0 | 3.941358  | -2.214903 | 1.744801  |
| H 0 | 4.942496  | -3.284996 | -1.394433 |
| H 0 | 3.959269  | -1.035149 | -1.543363 |
| H 0 | 0.208648  | -5.371855 | -1.366193 |
| H 0 | -3.067292 | -1.622435 | -1.923527 |
| H 0 | -3.018208 | 0.022016  | -1.262829 |
| H 0 | -3.069539 | -2.531316 | 0.439689  |
| H 0 | -3.775133 | -0.098995 | 1.495991  |
| H 0 | -6.317619 | -2.309643 | -0.851781 |
| H 0 | 4.543493  | -5.298608 | -0.060786 |
| H 0 | 6.317619  | -2.274823 | 0.626031  |
| H 0 | 3.093983  | 0.432419  | 0.990042  |
| H 0 | 4.679986  | 0.632012  | 0.246650  |
| H 0 | 2.007768  | 1.187668  | -1.163195 |
| H 0 | 3.600172  | 1.400845  | -1.880700 |
| H 0 | 2.558915  | 2.910349  | 0.581251  |
| H 0 | 4.156350  | 3.117453  | -0.124166 |
| H 0 | 1.510448  | 3.673137  | -1.574381 |
| H 0 | 3.107756  | 3.884059  | -2.275669 |
| H 0 | 2.206216  | 6.077925  | -1.470459 |
| H 0 | 3.646310  | 5.639678  | -0.537148 |
| H 0 | 2.036687  | 5.427771  | 0.168382  |
| H 0 | -1.416429 | -3.331729 | -1.487196 |
| H 0 | 2.890059  | -2.511411 | 1.806739  |
| H 0 | 4.068956  | -1.267912 | 2.275669  |
| H 0 | 4.535759  | -2.981486 | 2.248694  |

Free Energy (PCM/B3LYP/6-31G\*) = -1642.021980  
Number of imaginary frequencies = 0

**4-3E-c4**

B3LYP/6-31G\* geometry

|     |           |           |           |
|-----|-----------|-----------|-----------|
| O 0 | 1.134086  | -1.356592 | 0.133047  |
| C 0 | 2.268761  | -3.395332 | -0.425344 |
| C 0 | 3.626307  | -1.368898 | -0.111357 |
| C 0 | 3.580672  | -2.774018 | -0.771821 |
| C 0 | 2.284465  | -0.648800 | -0.445646 |
| C 0 | 1.194074  | -2.687633 | -0.003703 |
| C 0 | 0.086426  | -3.595406 | 0.302235  |
| N 0 | 0.605349  | -4.878535 | 0.024746  |
| C 0 | 1.936122  | -4.814691 | -0.368923 |
| S 0 | -1.796317 | -1.759441 | 1.168360  |
| C 0 | -3.584652 | -2.134666 | 1.359259  |
| C 0 | -4.421023 | -1.922743 | 0.082095  |
| C 0 | -4.007109 | -2.855943 | -1.050633 |
| O 0 | -4.347014 | -0.587838 | -0.359826 |
| O 0 | -3.581076 | -2.446537 | -2.112490 |
| O 0 | -4.157945 | -4.149916 | -0.740971 |
| O 0 | 2.677166  | -5.779414 | -0.595879 |
| O 0 | 4.685471  | -3.564729 | -0.335123 |
| O 0 | 4.628552  | -0.577249 | -0.759018 |
| C 0 | 2.191013  | 0.797306  | 0.023654  |
| C 0 | 0.976391  | 1.546415  | -0.542997 |
| C 0 | 0.900975  | 3.002852  | -0.068194 |
| C 0 | -0.302928 | 3.765228  | -0.636526 |
| C 0 | -0.378695 | 5.218659  | -0.157709 |
| C 0 | -1.165070 | -3.345787 | 0.742670  |
| C 0 | 3.901048  | -1.448626 | 1.394237  |
| H 0 | 3.662748  | -2.611912 | -1.859084 |
| H 0 | 2.153313  | -0.692358 | -1.535214 |
| H 0 | 0.146533  | -5.743305 | 0.275406  |
| H 0 | -3.943371 | -1.429134 | 2.112490  |
| H 0 | -3.709982 | -3.145682 | 1.755130  |

|     |           |           |           |
|-----|-----------|-----------|-----------|
| H 0 | -5.461825 | -2.164312 | 0.343767  |
| H 0 | -3.895952 | -0.613278 | -1.225106 |
| H 0 | -3.866955 | -4.683868 | -1.506502 |
| H 0 | 4.432902  | -4.493567 | -0.501716 |
| H 0 | 5.461825  | -1.072627 | -0.685588 |
| H 0 | 2.163592  | 0.817325  | 1.120168  |
| H 0 | 3.114484  | 1.300045  | -0.283436 |
| H 0 | 0.055314  | 1.021865  | -0.258461 |
| H 0 | 1.019443  | 1.523622  | -1.641793 |
| H 0 | 0.857897  | 3.025637  | 1.030903  |
| H 0 | 1.827018  | 3.526814  | -0.348215 |
| H 0 | -1.227286 | 3.239269  | -0.358469 |
| H 0 | -0.258375 | 3.743602  | -1.734743 |
| H 0 | -1.247887 | 5.734404  | -0.582086 |
| H 0 | 0.517730  | 5.779414  | -0.450521 |
| H 0 | -0.459953 | 5.271894  | 0.935131  |
| H 0 | -1.847214 | -4.178637 | 0.889597  |
| H 0 | 3.101119  | -1.968839 | 1.929643  |
| H 0 | 4.003383  | -0.443183 | 1.810657  |
| H 0 | 4.831484  | -1.995144 | 1.568898  |

Free Energy (PCM/B3LYP/6-31G\*) = -1642.021946  
Number of imaginary frequencies = 0

**4-3E-c5**

B3LYP/6-31G\* geometry

|     |           |           |           |
|-----|-----------|-----------|-----------|
| O 0 | 1.970702  | -1.255216 | -0.361541 |
| C 0 | 3.553972  | -3.022966 | -0.719610 |
| C 0 | 4.402177  | -0.865811 | 0.100993  |
| C 0 | 4.780055  | -2.175767 | -0.643507 |
| C 0 | 3.089507  | -0.320018 | -0.539913 |
| C 0 | 2.298874  | -2.537599 | -0.568437 |
| C 0 | 1.327642  | -3.629877 | -0.642824 |
| N 0 | 2.119438  | -4.781746 | -0.839759 |
| C 0 | 3.473255  | -4.473753 | -0.851571 |
| S 0 | -1.007817 | -2.190378 | -0.282954 |
| C 0 | -2.682942 | -2.926191 | -0.501946 |
| C 0 | -3.714637 | -2.028793 | 0.204546  |
| C 0 | -5.118437 | -2.571473 | -0.061413 |
| O 0 | -3.642326 | -0.687773 | -0.226110 |
| O 0 | -5.915907 | -1.996308 | -0.774705 |
| O 0 | -5.344393 | -3.742643 | 0.544640  |
| O 0 | 4.406406  | -5.283292 | -0.932090 |
| O 0 | 5.853299  | -2.836575 | 0.026076  |
| O 0 | 5.383417  | 0.137209  | -0.185736 |
| C 0 | 2.624236  | 1.028292  | -0.005570 |
| C 0 | 1.472229  | 1.645946  | -0.810935 |
| C 0 | 1.040955  | 3.014564  | -0.268972 |
| C 0 | -0.111234 | 3.647031  | -1.060017 |
| C 0 | -0.538924 | 5.013100  | -0.513588 |
| C 0 | -0.019982 | -3.618011 | -0.557933 |
| C 0 | 4.284336  | -1.078031 | 1.614229  |
| H 0 | 5.114703  | -1.878690 | -1.651075 |
| H 0 | 3.259501  | -0.249392 | -1.622583 |
| H 0 | 1.767015  | -5.728350 | -0.815982 |
| H 0 | -2.694582 | -3.926819 | -0.062903 |
| H 0 | -2.908398 | -2.996418 | -1.570101 |
| H 0 | -3.527694 | -2.050086 | 1.284023  |
| H 0 | -4.317764 | -0.586940 | -0.923293 |
| H 0 | -6.242654 | -4.043815 | 0.303432  |
| H 0 | 5.816365  | -3.768666 | -0.264356 |
| H 0 | 6.242654  | -0.235727 | 0.074547  |
| H 0 | 2.323499  | 0.914585  | 1.043153  |
| H 0 | 3.489670  | 1.699703  | -0.019971 |
| H 0 | 0.612479  | 0.963823  | -0.805352 |
| H 0 | 1.779642  | 1.750401  | -1.861757 |
| H 0 | 0.742051  | 2.910510  | 0.784688  |
| H 0 | 1.903407  | 3.697697  | -0.275371 |
| H 0 | -0.972029 | 2.963454  | -1.052656 |
| H 0 | 0.187101  | 3.750769  | -2.113001 |
| H 0 | -1.363112 | 5.437604  | -1.098433 |
| H 0 | 0.292609  | 5.728350  | -0.540780 |
| H 0 | -0.874256 | 4.935055  | 0.528124  |
| H 0 | -0.560747 | -4.555909 | -0.651222 |
| H 0 | 3.479583  | -1.774344 | 1.868685  |
| H 0 | 4.092013  | -0.124694 | 2.113001  |
| H 0 | 5.219789  | -1.491707 | 1.999831  |

Free Energy (PCM/B3LYP/6-31G\*) = -1642.021600

Number of imaginary frequencies = 0

#### 4-3E-c6

B3LYP/6-31G\* geometry

O 0 1.150904 -1.400207 0.232985  
C 0 1.509724 -3.709554 -0.309862  
C 0 3.485251 -2.290316 0.049151  
C 0 2.964411 -3.590466 -0.622397  
C 0 2.492174 -1.143256 -0.311506  
C 0 0.744679 -2.668139 0.090882  
C 0 -0.617575 -3.128694 0.378329  
N 0 -0.576359 -4.512376 0.113907  
C 0 0.696373 -4.921798 -0.264560  
S 0 -1.729728 -0.729934 1.190261  
C 0 -3.526145 -0.442730 1.456496  
C 0 -4.346319 -0.287579 0.167892  
C 0 -4.651827 -1.637728 -0.510870  
O 0 -3.779552 0.620206 -0.770519  
O 0 -5.008173 -2.625552 0.097974  
O 0 -4.533105 -1.617294 -1.841932  
O 0 1.051897 -6.084421 -0.487960  
O 0 3.710574 -4.716703 -0.163495  
O 0 4.717578 -1.903444 -0.568718  
C 0 2.903082 0.243026 0.167321  
C 0 2.046750 1.374070 -0.419732  
C 0 2.495554 2.762427 0.053576  
C 0 1.654920 3.905631 -0.529349  
C 0 2.110437 5.290194 -0.056826  
C 0 -1.704640 -2.451343 0.800522  
C 0 3.676698 -2.458893 1.560189  
H 0 3.123741 -3.470546 -1.706445  
H 0 2.381395 -1.138335 -1.404057  
H 0 -1.326133 -5.156763 0.322674  
H 0 -3.562556 0.491350 2.021888  
H 0 -3.946495 -1.238311 2.074850  
H 0 -5.320600 0.130033 0.450882  
H 0 -2.807569 0.523565 -0.722286  
H 0 -4.225023 -0.710963 -2.074850  
H 0 3.158612 -5.500379 -0.350350  
H 0 5.320600 -2.660943 -0.480566  
H 0 2.858836 0.272681 1.262982  
H 0 3.951464 0.386215 -0.115765  
H 0 0.994627 1.218209 -0.148942  
H 0 2.094768 1.330962 -1.517660  
H 0 2.451791 2.804378 1.152063  
H 0 3.551268 2.914904 -0.215800  
H 0 0.600650 3.754227 -0.257401  
H 0 1.696393 3.861459 -1.627010  
H 0 1.491567 6.084421 -0.490121  
H 0 3.151327 5.483544 -0.344572  
H 0 2.047512 5.376169 1.035120  
H 0 -2.641278 -2.979153 0.951371  
H 0 2.733885 -2.676384 2.070937  
H 0 4.103525 -1.547890 1.987503  
H 0 4.361050 -3.289190 1.752814

Free Energy (PCM/B3LYP/6-31G\*) = -1642.021418

Number of imaginary frequencies = 0

#### 4-3E-c7

B3LYP/6-31G\* geometry

O 0 0.681002 -0.660443 0.285080  
C 0 2.770650 -1.726937 -0.214438  
C 0 2.803556 0.656826 0.401287  
C 0 3.578552 -0.476756 -0.327322  
C 0 1.324988 0.605128 -0.090167  
C 0 1.450719 -1.737625 0.086804  
C 0 0.965828 -3.114948 0.174623  
N 0 2.103167 -3.900066 -0.112748  
C 0 3.232166 -3.108566 -0.295744  
S 0 -1.648091 -2.594446 0.892001  
C 0 -2.984134 -3.864795 0.848240  
C 0 -4.342334 -3.161079 0.767826  
C 0 -4.518560 -2.352481 -0.517974  
O 0 -4.516656 -2.306103 1.877092  
O 0 -4.836511 -1.178523 -0.507804  
O 0 -4.323719 -3.077292 -1.623254  
O 0 4.387823 -3.516123 -0.467202

O 0 4.883478 -0.624806 0.231854  
O 0 3.288478 1.925094 -0.053428  
C 0 0.419443 1.716637 0.425101  
C 0 -0.950240 1.744691 -0.269225  
C 0 -1.889234 2.817688 0.294907  
C 0 -3.264414 2.832921 -0.385672  
C 0 -4.211362 3.890801 0.190164  
C 0 -0.267621 -3.589481 0.451982  
C 0 2.926904 0.554381 1.925035  
H 0 3.672752 -0.164468 -1.380307  
H 0 1.345037 0.625153 -1.188215  
H 0 2.153318 -4.899138 0.031209  
H 0 -2.946594 -4.466805 1.759407  
H 0 -2.843748 -4.511400 -0.020171  
H 0 -5.115571 -3.946054 0.759430  
H 0 -4.823242 -1.452611 1.513962  
H 0 -4.468949 -2.499822 -2.398433  
H 0 5.183665 -1.518874 -0.021960  
H 0 4.245331 1.932370 0.118240  
H 0 0.284470 1.595080 1.506903  
H 0 0.940320 2.667745 0.270504  
H 0 -1.427502 0.761381 -0.172672  
H 0 -0.805704 1.914905 -1.346139  
H 0 -2.022259 2.652432 1.374452  
H 0 -1.420687 3.807914 0.192873  
H 0 -3.723939 1.838459 -0.292583  
H 0 -3.132391 3.007563 -1.463032  
H 0 -5.183665 3.875194 -0.315816  
H 0 -3.793445 4.899138 0.078775  
H 0 -4.389127 3.722675 1.259691  
H 0 -0.435842 -4.662994 0.453978  
H 0 2.482785 -0.368310 2.310220  
H 0 2.429586 1.405015 2.398433  
H 0 3.982318 0.563337 2.209767

Free Energy (PCM/B3LYP/6-31G\*) = -1642.021069

Number of imaginary frequencies = 0

#### 4-3E-c8

B3LYP/6-31G\* geometry

O 0 2.297250 -1.395515 -0.144715  
C 0 3.171567 -3.590544 -0.567258  
C 0 4.762709 -1.811473 0.020507  
C 0 4.603144 -3.186701 -0.683434  
C 0 3.626028 -0.880177 -0.502067  
C 0 2.168304 -2.719884 -0.303773  
C 0 0.897831 -3.437185 -0.197426  
N 0 1.244655 -4.787878 -0.427373  
C 0 2.614046 -4.937898 -0.600722  
S 0 -0.784508 -1.307628 0.332408  
C 0 -2.574309 -1.449095 0.704557  
C 0 -3.470790 -1.679077 -0.511973  
C 0 -4.931537 -1.380300 -0.141486  
O 0 -3.275619 -3.001798 -0.971614  
O 0 -5.283806 -0.444591 0.545497  
O 0 -5.780920 -2.247386 -0.719871  
O 0 3.221978 -6.009002 -0.730933  
O 0 5.484758 -4.148726 -0.104988  
O 0 5.971557 -1.190340 -0.431493  
C 0 3.687989 0.557385 -0.002185  
C 0 2.706289 1.499197 -0.713711  
C 0 2.811529 2.946891 -0.217376  
C 0 1.842166 3.904813 -0.921623  
C 0 1.955862 5.349957 -0.425154  
C 0 -0.351543 -2.988538 0.046540  
C 0 4.770867 -1.942218 1.547436  
H 0 4.883935 -3.033177 -1.738383  
H 0 3.672852 -0.891953 -1.599275  
H 0 0.621347 -5.568092 -0.272242  
H 0 -2.837141 -0.494743 1.164823  
H 0 -2.730210 -2.240168 1.443477  
H 0 -3.209737 -0.944483 -1.290710  
H 0 -3.857057 -3.148636 -1.735182  
H 0 -6.690203 -1.970249 -0.493160  
H 0 5.107657 -5.022987 -0.324672  
H 0 6.690203 -1.817465 -0.243325  
H 0 3.497915 0.569881 1.078123  
H 0 4.714468 0.909383 -0.151516

H 0 1.679897 1.137710 -0.570939  
H 0 2.898046 1.471035 -1.796365  
H 0 2.624249 2.974502 0.866412  
H 0 3.842012 3.305642 -0.358007  
H 0 0.812559 3.547699 -0.777933  
H 0 2.027239 3.874696 -2.004836  
H 0 1.252859 6.009002 -0.947655  
H 0 2.966631 5.744906 -0.586471  
H 0 1.741646 5.417871 0.648759  
H 0 -1.181832 -3.686219 0.055399  
H 0 3.816825 -2.314950 1.932248  
H 0 4.975799 -0.970900 2.004836  
H 0 5.552307 -2.643651 1.850954  
Free Energy (PCM/B3LYP/6-31G\*) = -1642.020932  
Number of imaginary frequencies = 0

#### 4-3E-c9

B3LYP/6-31G\* geometry  
O 0 0.944322 -1.334901 -1.263126  
C 0 2.444983 -2.264352 0.378955  
C 0 3.285747 -0.525296 -1.158676  
C 0 3.574797 -1.314587 0.152250  
C 0 1.789357 -0.123724 -1.282399  
C 0 1.272439 -2.213386 -0.302711  
C 0 0.385188 -3.293580 0.129012  
N 0 1.133277 -3.979189 1.105880  
C 0 2.371744 -3.384712 1.324560  
S 0 -1.772241 -2.801816 -1.534177  
C 0 -3.447314 -3.506813 -1.277513  
C 0 -4.212123 -2.941392 -0.067728  
C 0 -4.294542 -1.417693 -0.103665  
O 0 -3.629150 -3.348321 1.148945  
O 0 -3.861407 -0.722077 0.795495  
O 0 -4.884543 -0.953042 -1.208395  
O 0 3.206498 -3.748585 2.155070  
O 0 3.750658 -0.404180 1.248337  
O 0 3.603048 -1.384297 -2.265502  
C 0 1.255005 0.886302 -0.264580  
C 0 -0.211896 1.275889 -0.496349  
C 0 -0.697699 2.350400 0.485235  
C 0 -2.169346 2.736889 0.286646  
C 0 -2.643647 3.817854 1.263776  
C 0 -0.866215 -3.614647 -0.263305  
C 0 4.206484 0.682279 -1.308172  
H 0 4.511114 -1.865477 -0.015991  
H 0 1.640331 0.253061 -2.297859  
H 0 0.778947 -4.738374 1.670489  
H 0 -3.372352 -4.592696 -1.176140  
H 0 -3.990784 -3.287025 -2.199930  
H 0 -5.240526 -3.328858 -0.132299  
H 0 -3.365186 -2.529992 1.611939  
H 0 -4.892311 0.023501 -1.165404  
H 0 3.831188 -0.951895 2.047232  
H 0 2.935421 -2.089105 -2.303799  
H 0 1.392533 0.496354 0.749626  
H 0 1.880634 1.784583 -0.334648  
H 0 -0.848498 0.386917 -0.406494  
H 0 -0.333934 1.641303 -1.526799  
H 0 -0.554436 1.992228 1.515663  
H 0 -0.069293 3.248016 0.384756  
H 0 -2.795762 1.841143 0.398004  
H 0 -2.314410 3.088195 -0.745177  
H 0 -3.697193 4.072187 1.099008  
H 0 -2.056986 4.738374 1.152386  
H 0 -2.540278 3.483847 2.303799  
H 0 -1.375661 -4.448712 0.207568  
H 0 4.135858 1.352698 -0.450919  
H 0 3.962445 1.234470 -2.221847  
H 0 5.240526 0.331218 -1.386647  
Free Energy (PCM/B3LYP/6-31G\*) = -1642.020830  
Number of imaginary frequencies = 0

#### 4-3E-c10

B3LYP/6-31G\* geometry  
O 0 1.245483 -1.417012 -0.491338  
C 0 2.446991 -3.485722 -0.682340  
C 0 3.566672 -1.602090 0.432932

C 0 3.788765 -2.939197 -0.325678  
C 0 2.553033 -0.753471 -0.394872  
C 0 1.321619 -2.733837 -0.725145  
C 0 0.170016 -3.574593 -1.053856  
N 0 0.717846 -4.868481 -1.197493  
C 0 2.081190 -4.875430 -0.932886  
S 0 -1.814876 -1.651129 -1.014388  
C 0 -3.562238 -1.940744 -1.503858  
C 0 -4.446796 -2.550953 -0.414061  
C 0 -4.516852 -1.643201 0.826495  
O 0 -3.987223 -3.839427 -0.001432  
O 0 -4.742350 -0.454079 0.758031  
O 0 -4.331945 -2.277916 1.988262  
O 0 2.813801 -5.872869 -0.896872  
O 0 4.547383 -3.846056 0.473851  
O 0 4.778830 -0.839870 0.405265  
C 0 2.294310 0.648375 0.142283  
C 0 1.489307 1.537325 -0.816354  
C 0 1.255715 2.947089 -0.258621  
C 0 0.447266 3.848456 -1.200563  
C 0 0.214153 5.253986 -0.636856  
C 0 -1.133264 -3.261670 -1.211079  
C 0 3.112676 -1.827140 1.879252  
H 0 4.365555 -2.692497 -1.232285  
H 0 2.940185 -0.690964 -1.420735  
H 0 0.168003 -5.712077 -1.281613  
H 0 -3.586952 -2.559845 -2.403577  
H 0 -3.948873 -0.950861 -1.757219  
H 0 -5.467782 -2.614154 -0.811652  
H 0 -4.587029 -4.519798 -0.345038  
H 0 -4.146596 -3.217995 1.760039  
H 0 4.358779 -4.737106 0.120238  
H 0 5.467782 -1.403903 0.795589  
H 0 1.771892 0.572576 1.103788  
H 0 3.269586 1.105277 0.342395  
H 0 0.521681 1.066083 -1.030930  
H 0 2.020147 1.608617 -1.776973  
H 0 0.734331 2.873842 0.707408  
H 0 2.225871 3.420685 -0.046478  
H 0 -0.521242 3.373314 -1.411784  
H 0 0.967801 3.922454 -2.166016  
H 0 -0.365416 5.872869 -1.331585  
H 0 1.165275 5.766776 -0.446637  
H 0 -0.335223 5.213378 0.311990  
H 0 -1.845788 -4.042663 -1.453655  
H 0 2.138635 -2.322882 1.930782  
H 0 3.045250 -0.870413 2.403577  
H 0 3.838729 -2.459345 2.396985  
Free Energy (PCM/B3LYP/6-31G\*) = -1642.020763  
Number of imaginary frequencies = 0

#### 4-3E-c11

B3LYP/6-31G\* geometry  
O 0 -1.226846 -1.918366 0.442928  
C 0 -2.508120 -3.583280 -0.739982  
C 0 -3.392129 -2.709711 1.387924  
C 0 -3.738138 -3.503651 0.099896  
C 0 -2.472244 -1.487325 1.093687  
C 0 -1.394580 -2.844173 -0.505754  
C 0 -0.334113 -3.214624 -1.444010  
N 0 -0.911965 -4.226958 -2.233801  
C 0 -2.237331 -4.466781 -1.877523  
S 0 1.661157 -1.510305 -0.557902  
C 0 3.299388 -1.342906 -1.390834  
C 0 4.370920 -0.993622 -0.356390  
C 0 4.597704 -2.101376 0.671413  
O 0 4.021816 0.197481 0.316667  
O 0 4.594837 -1.887716 1.868312  
O 0 4.836504 -3.292576 0.113639  
O 0 -2.993699 -5.264767 -2.435014  
O 0 -4.835451 -2.870661 -0.573568  
O 0 -2.638259 -3.656894 2.161135  
C 0 -3.095308 -0.342508 0.288163  
C 0 -2.168111 0.868832 0.117837  
C 0 -2.850183 2.034383 -0.610202  
C 0 -1.934735 3.249902 -0.805067  
C 0 -2.623349 4.414511 -1.524295

C O 0.928649 -2.752665 -1.566637  
 C O -4.647999 -2.294680 2.158971  
 H O -4.042082 -4.509631 0.422972  
 H O -2.119208 -1.100939 2.055872  
 H O -0.484500 -4.621815 -3.059617  
 H O 3.246108 -0.544162 -2.134168  
 H O 3.550018 -2.280133 -1.891546  
 H O 5.322241 -0.867642 -0.899394  
 H O 4.180259 0.026587 1.265224  
 H O 4.993485 -3.939521 0.829329  
 H O -4.941093 -3.338898 -1.418297  
 H O -2.412011 -3.234343 3.006285  
 H O -3.421087 -0.718633 -0.687490  
 H O -4.003705 -0.024742 0.813405  
 H O -1.268352 0.571146 -0.434629  
 H O -1.825802 1.207956 1.106819  
 H O -3.208944 1.690266 -1.591697  
 H O -3.745484 2.341159 -0.049122  
 H O -1.044000 2.944284 -1.372093  
 H O -1.570398 3.589070 0.175154  
 H O -1.943172 5.264767 -1.650770  
 H O -3.496571 4.766400 -0.960993  
 H O -2.971212 4.114215 -2.520544  
 H O 1.568774 -3.175281 -2.335815  
 H O -5.322241 -1.684345 -1.555999  
 H O -4.375592 -1.730676 3.059617  
 H O -5.184744 -3.196313 2.470588  
 Free Energy (PCM/B3LYP/6-31G\*) = -1642.020711  
 Number of imaginary frequencies = 0

#### 4-3Z-c1

B3LYP/6-31G\* geometry  
 O O 1.811819 -1.427858 0.157214  
 C O 2.224287 -3.703792 -0.482361  
 C O 4.165336 -2.240042 -0.116632  
 C O 3.666844 -3.529919 -0.824479  
 C O 3.129703 -1.110921 -0.408674  
 C O 1.440002 -2.699543 -0.027354  
 C O 0.096277 -3.209275 0.265057  
 N O 0.167934 -4.577493 -0.033508  
 C O 1.441036 -4.936017 -0.474858  
 S O -2.500439 -3.202264 1.167409  
 C O -3.607710 -1.755213 0.955526  
 C O -3.932408 -1.435510 -0.519420  
 C O -4.830465 -0.200225 -0.577166  
 O O -4.574523 -2.505885 -1.169924  
 O O -5.995660 -0.256109 -0.918725  
 O O -4.205369 0.917057 -0.188363  
 O O 1.810927 -6.076800 -0.768844  
 O O 4.458559 -4.648327 -0.425403  
 O O 5.370055 -1.792751 -0.748171  
 C O 3.510626 0.268251 0.113453  
 C O 2.590214 1.388966 -0.390667  
 C O 3.012794 2.773808 0.115920  
 C O 2.108721 3.907648 -0.384374  
 C O 2.540525 5.289033 0.118802  
 C O -0.952576 -2.499202 0.727669  
 C O 4.399671 -2.460209 1.381749  
 H O 3.796887 -3.365966 -1.906629  
 H O 2.993092 -1.066819 -1.497524  
 H O -0.586425 -5.239019 0.084427  
 H O -3.157291 -0.892143 1.453407  
 H O -4.526342 -2.021622 1.486347  
 H O -2.999249 -1.206418 -1.048310  
 H O -5.521829 -2.272046 -1.201992  
 H O -4.846706 1.654156 -0.222208  
 H O 3.933242 -5.441708 -0.642999  
 H O 5.995660 -2.535800 -0.707140  
 H O 3.509053 0.251383 1.210198  
 H O 4.541106 0.462338 -0.203048  
 H O 1.557659 1.184724 -0.079378  
 H O 2.588774 1.388864 -1.490508  
 H O 3.018061 2.773099 1.216060  
 H O 4.049410 2.973126 -0.193969  
 H O 1.073828 3.710143 -0.070750  
 H O 2.100279 3.904712 -1.483657  
 H O 1.876648 6.076800 -0.255691

H O 3.560026 5.528023 -0.208559  
 H O 2.525995 5.333391 1.214946  
 H O -0.819925 -1.435183 0.899961  
 H O 3.475869 -2.721599 1.906629  
 H O 4.813915 -1.555127 1.833375  
 H O 5.109653 -3.278803 1.525635  
 Free Energy (PCM/B3LYP/6-31G\*) = -1642.025760  
 Number of imaginary frequencies = 0

#### 4-3Z-c2

B3LYP/6-31G\* geometry  
 O O 0.629381 -0.700540 -0.693239  
 C O -0.148731 -2.955573 -0.953650  
 C O 1.968114 -2.597609 0.245721  
 C O 1.123645 -3.627260 -0.554649  
 C O 1.979795 -1.264480 -0.563567  
 C O -0.308225 -1.611785 -0.974006  
 C O -1.690075 -1.279703 -1.334175  
 N O -2.309933 -2.522109 -1.543051  
 C O -1.435706 -3.572678 -1.258417  
 S O -3.862527 0.260068 -2.003870  
 C O -4.219134 1.886324 -1.224518  
 C O -4.825813 1.801799 0.190047  
 C O -3.881322 1.140739 1.188718  
 O O -6.055135 1.115923 0.182804  
 O O -4.158235 0.106272 1.763410  
 O O -2.735548 1.814383 1.345198  
 O O -1.726330 -4.772695 -1.250091  
 O O 0.896601 -4.796670 0.231118  
 O O 3.335964 -3.020462 0.258684  
 C O 2.859853 -0.163957 0.014200  
 C O 3.036948 1.035553 -0.927737  
 C O 3.946466 2.121328 -0.339575  
 C O 4.143176 3.322582 -1.273296  
 C O 5.056938 4.401791 -0.683731  
 C O -2.223618 -0.046941 -1.447553  
 C O 1.452537 -2.419148 1.677876  
 H O 1.718397 -3.899811 -1.441672  
 H O 2.310418 -1.503969 -1.583161  
 H O -3.310633 -2.650030 -1.613153  
 H O -4.954401 2.359940 -1.879128  
 H O -3.311791 2.495906 -1.230640  
 H O -4.987988 2.837555 0.523101  
 H O -5.909480 0.295534 0.691235  
 H O -2.177325 1.325749 1.981754  
 H O 0.125556 -5.244120 -0.166978  
 H O 3.344674 -3.912358 0.645353  
 H O 2.435101 0.172345 0.968100  
 H O 3.835102 -0.610025 0.237176  
 H O 2.055134 1.467292 -1.161353  
 H O 3.457296 0.686749 -1.882302  
 H O 3.527033 2.469873 0.615979  
 H O 4.927201 1.683836 -0.100440  
 H O 3.163166 3.760960 -1.509718  
 H O 4.559193 2.972854 -2.228899  
 H O 5.178020 5.244120 -1.374637  
 H O 6.055135 4.000649 -0.468422  
 H O 4.649301 4.796400 0.255360  
 H O -1.596371 0.813023 -1.235105  
 H O 0.433536 -2.021486 1.699209  
 H O 2.105692 -1.737536 2.228899  
 H O 1.445529 -3.385885 2.187971  
 Free Energy (PCM/B3LYP/6-31G\*) = -1642.025120  
 Number of imaginary frequencies = 0

#### 4-3Z-c3

B3LYP/6-31G\* geometry  
 O O 2.179261 -1.383300 -0.285317  
 C O 3.203068 -3.522301 -0.653412  
 C O 4.640290 -1.671194 0.087888  
 C O 4.616546 -3.043106 -0.640612  
 C O 3.503386 -0.793400 -0.519861  
 C O 2.137442 -2.707576 -0.472031  
 C O 0.900294 -3.493183 -0.487524  
 N O 1.329311 -4.817512 -0.673314  
 C O 2.718430 -4.894937 -0.753788  
 S O -1.781846 -4.044795 -0.300254

|     |           |           |           |
|-----|-----------|-----------|-----------|
| C 0 | -3.120554 | -2.876084 | -0.768581 |
| C 0 | -3.570895 | -1.943964 | 0.371683  |
| C 0 | -4.778132 | -1.125177 | -0.086917 |
| O 0 | -2.548677 | -1.061577 | 0.781531  |
| O 0 | -4.726261 | 0.079275  | -0.242481 |
| O 0 | -5.861867 | -1.875388 | -0.311566 |
| O 0 | 3.381577  | -5.932030 | -0.862809 |
| O 0 | 5.496111  | -3.962011 | 0.007070  |
| O 0 | 5.847246  | -0.979667 | -0.251990 |
| C 0 | 3.440353  | 0.636592  | 0.001747  |
| C 0 | 2.472749  | 1.531045  | -0.786334 |
| C 0 | 2.423282  | 2.967652  | -0.251456 |
| C 0 | 1.468780  | 3.876648  | -1.036339 |
| C 0 | 1.417384  | 5.308766  | -0.494184 |
| C 0 | -0.354577 | -3.020532 | -0.350194 |
| C 0 | 4.524814  | -1.825604 | 1.608109  |
| H 0 | 4.979420  | -2.861472 | -1.665509 |
| H 0 | 3.646664  | -0.782572 | -1.608766 |
| H 0 | 0.729574  | -5.630337 | -0.668392 |
| H 0 | -3.949884 | -3.519591 | -1.074121 |
| H 0 | -2.795853 | -2.295049 | -1.635831 |
| H 0 | -3.876638 | -2.555188 | 1.229451  |
| H 0 | -2.784573 | -0.187285 | 0.415119  |
| H 0 | -6.580469 | -1.290766 | -0.624087 |
| H 0 | 5.207388  | -4.852096 | -0.271629 |
| H 0 | 6.580469  | -1.569831 | -0.008560 |
| H 0 | 3.151445  | 0.619749  | 1.059863  |
| H 0 | 4.453908  | 1.049094  | -0.047954 |
| H 0 | 1.465471  | 1.095854  | -0.757340 |
| H 0 | 2.774244  | 1.545896  | -1.843914 |
| H 0 | 2.120332  | 2.951808  | 0.806045  |
| H 0 | 3.434917  | 3.399658  | -0.272478 |
| H 0 | 0.459361  | 3.441610  | -1.018367 |
| H 0 | 1.774010  | 3.895501  | -2.092236 |
| H 0 | 0.728094  | 5.932030  | -1.075543 |
| H 0 | 2.406711  | 5.781668  | -0.531059 |
| H 0 | 1.081708  | 5.324753  | 0.550206  |
| H 0 | -0.512189 | -1.958448 | -0.204122 |
| H 0 | 3.571200  | -2.273998 | 1.902485  |
| H 0 | 4.616258  | -0.849889 | 2.092236  |
| H 0 | 5.326258  | -2.473016 | 1.973174  |

Free Energy (PCM/B3LYP/6-31G\*) = -1642.024884  
Number of imaginary frequencies = 0

#### 4-3Z-c4

B3LYP/6-31G\* geometry

|     |           |           |           |
|-----|-----------|-----------|-----------|
| O 0 | 1.972108  | -1.399061 | -0.226598 |
| C 0 | 2.328784  | -3.710484 | -0.764089 |
| C 0 | 4.288908  | -2.347913 | -0.175106 |
| C 0 | 3.811324  | -3.626729 | -0.917167 |
| C 0 | 3.367796  | -1.171899 | -0.622753 |
| C 0 | 1.552499  | -2.652952 | -0.428441 |
| C 0 | 0.157630  | -3.080254 | -0.296824 |
| N 0 | 0.178735  | -4.453593 | -0.598335 |
| C 0 | 1.483200  | -4.897284 | -0.821150 |
| S 0 | -2.555267 | -2.885043 | 0.073007  |
| C 0 | -3.378985 | -1.604501 | 1.106114  |
| C 0 | -3.699715 | -0.289192 | 0.382033  |
| C 0 | -4.541357 | -0.501406 | -0.873904 |
| O 0 | -2.523503 | 0.409784  | 0.038049  |
| O 0 | -4.198691 | -0.086413 | -1.963884 |
| O 0 | -5.676629 | -1.165103 | -0.634840 |
| O 0 | 1.826613  | -6.070261 | -1.003050 |
| O 0 | 4.477122  | -4.777868 | -0.398808 |
| O 0 | 5.589949  | -1.986205 | -0.651489 |
| C 0 | 3.757348  | 0.198935  | -0.084890 |
| C 0 | 2.975527  | 1.351996  | -0.730243 |
| C 0 | 3.394961  | 2.726082  | -0.193057 |
| C 0 | 2.629383  | 3.890169  | -0.834977 |
| C 0 | 3.054257  | 5.260464  | -0.296986 |
| C 0 | -0.896609 | -2.304075 | 0.023121  |
| C 0 | 4.313133  | -2.538476 | 1.345376  |
| H 0 | 4.090227  | -3.497773 | -1.975821 |
| H 0 | 3.375124  | -1.151304 | -1.720915 |
| H 0 | -0.582111 | -5.089401 | -0.399908 |
| H 0 | -2.752020 | -1.396483 | 1.975821  |
| H 0 | -4.302872 | -2.072812 | 1.454202  |

|     |           |           |           |
|-----|-----------|-----------|-----------|
| H 0 | -4.304454 | 0.314867  | 1.077383  |
| H 0 | -2.579519 | 0.577594  | -0.922860 |
| H 0 | -6.161181 | -1.258840 | -1.478561 |
| H 0 | 3.921259  | -5.543161 | -0.641479 |
| H 0 | 6.161181  | -2.759374 | -0.506621 |
| H 0 | 3.611468  | 0.214544  | 1.002197  |
| H 0 | 4.829778  | 0.327818  | -0.266726 |
| H 0 | 1.900753  | 1.205969  | -0.562005 |
| H 0 | 3.125630  | 1.325453  | -1.819476 |
| H 0 | 3.246264  | 2.752161  | 0.896721  |
| H 0 | 4.473707  | 2.867043  | -0.357140 |
| H 0 | 1.551869  | 3.749477  | -0.668959 |
| H 0 | 2.776451  | 3.862394  | -1.924052 |
| H 0 | 2.491357  | 6.070261  | -0.775442 |
| H 0 | 4.120862  | 5.443054  | -0.477827 |
| H 0 | 2.885397  | 5.330572  | 0.784845  |
| H 0 | -0.743599 | -1.250452 | 0.224201  |
| H 0 | 3.314579  | -2.727503 | 1.750724  |
| H 0 | 4.722629  | -1.647042 | 1.827626  |
| H 0 | 4.944832  | -3.393962 | 1.598343  |

Free Energy (PCM/B3LYP/6-31G\*) = -1642.024712  
Number of imaginary frequencies = 0

#### 4-3Z-c5

B3LYP/6-31G\* geometry

|     |           |           |           |
|-----|-----------|-----------|-----------|
| O 0 | 1.193774  | -0.469531 | -0.181786 |
| C 0 | -0.005824 | -2.481043 | -0.696764 |
| C 0 | 2.342733  | -2.687291 | 0.001521  |
| C 0 | 1.182115  | -3.382201 | -0.763332 |
| C 0 | 2.419047  | -1.212778 | -0.501240 |
| C 0 | 0.072046  | -1.162812 | -0.406978 |
| C 0 | -1.278428 | -0.584488 | -0.357612 |
| N 0 | -2.136717 | -1.652535 | -0.655280 |
| C 0 | -1.417923 | -2.837299 | -0.800711 |
| S 0 | -3.085364 | 1.582765  | -0.048251 |
| C 0 | -4.146373 | 0.847295  | -1.372836 |
| C 0 | -5.337899 | 0.020978  | -0.862128 |
| C 0 | -6.221665 | 0.804514  | 0.105853  |
| O 0 | -4.933383 | -1.176312 | -0.226820 |
| O 0 | -6.456952 | 0.409856  | 1.231098  |
| O 0 | -6.688785 | 1.939299  | -0.420170 |
| O 0 | -1.903607 | -3.963697 | -0.956726 |
| O 0 | 0.917066  | -4.668564 | -0.204862 |
| O 0 | 3.587557  | -3.268319 | -0.402817 |
| C 0 | 3.581756  | -0.397466 | 0.049822  |
| C 0 | 3.748031  | 0.965268  | -0.637506 |
| C 0 | 4.935297  | 1.766952  | -0.089432 |
| C 0 | 5.111907  | 3.131194  | -0.768309 |
| C 0 | 6.299941  | 3.928384  | -0.219885 |
| C 0 | -1.556457 | 0.709990  | -0.098593 |
| C 0 | 2.175142  | -2.790569 | 1.521144  |
| H 0 | 1.522764  | -3.506364 | -1.804355 |
| H 0 | 2.480590  | -1.245123 | -1.597482 |
| H 0 | -3.143252 | -1.627946 | -0.477635 |
| H 0 | -3.522729 | 0.233259  | -2.024571 |
| H 0 | -4.521036 | 1.689824  | -1.958833 |
| H 0 | -5.950286 | -0.228370 | -1.740549 |
| H 0 | -5.252497 | -1.122586 | 0.696478  |
| H 0 | -7.240433 | 2.387206  | 0.251252  |
| H 0 | 0.005652  | -4.895172 | -0.473491 |
| H 0 | 3.516511  | -4.222124 | -0.228701 |
| H 0 | 3.442676  | -0.254554 | 1.128453  |
| H 0 | 4.490221  | -0.995391 | -0.080315 |
| H 0 | 2.826662  | 1.549820  | -0.519029 |
| H 0 | 3.880717  | 0.811015  | -1.718391 |
| H 0 | 4.806311  | 1.915429  | 0.993037  |
| H 0 | 5.857787  | 1.179550  | -0.209056 |
| H 0 | 4.189772  | 3.717056  | -0.846670 |
| H 0 | 5.238558  | 2.982744  | -1.850147 |
| H 0 | 6.401194  | 4.895172  | -0.726439 |
| H 0 | 7.240433  | 3.380037  | -0.355823 |
| H 0 | 6.183562  | 4.124523  | 0.853318  |
| H 0 | -0.717264 | 1.351841  | 0.151305  |
| H 0 | 1.273916  | -2.277240 | 1.869509  |
| H 0 | 3.041864  | -2.354439 | 2.024571  |
| H 0 | 2.095358  | -3.841623 | 1.810921  |

Free Energy (PCM/B3LYP/6-31G\*) = -1642.024351

Number of imaginary frequencies = 0

#### 4-3Z-c6

B3LYP/6-31G\* geometry

O 0 1.744873 -1.400019 -0.220197  
C 0 2.126132 -3.708363 -0.755106  
C 0 4.073051 -2.322161 -0.177735  
C 0 3.606648 -3.606822 -0.916863  
C 0 3.136637 -1.156390 -0.620637  
C 0 1.339436 -2.659162 -0.418507  
C 0 -0.049955 -3.102024 -0.279050  
N 0 -0.013907 -4.476173 -0.572901  
C 0 1.293825 -4.905159 -0.804847  
S 0 -2.764413 -2.925539 0.101703  
C 0 -3.592899 -1.637373 1.122436  
C 0 -3.973603 -0.363576 0.364917  
C 0 -4.946430 -0.668678 -0.788186  
O 0 -2.830788 0.306065 -0.174325  
O 0 -5.948259 -1.335167 -0.641094  
O 0 -4.606081 -0.123501 -1.959950  
O 0 1.649428 -6.074147 -0.988028  
O 0 4.289682 -4.749362 -0.402115  
O 0 5.367371 -1.945544 -0.660647  
C 0 3.511925 0.217698 -0.080726  
C 0 2.715011 1.363439 -0.720635  
C 0 3.113188 2.739873 -0.173337  
C 0 2.331352 3.897087 -0.808090  
C 0 2.732982 5.269443 -0.257659  
C 0 -1.110383 -2.334024 0.040159  
C 0 4.107170 -2.512298 1.342651  
H 0 3.877560 -3.474739 -1.977189  
H 0 3.140150 -1.133713 -1.718733  
H 0 -0.769672 -5.119624 -0.380316  
H 0 -2.957344 -1.397233 1.977189  
H 0 -4.503823 -2.114915 1.490654  
H 0 -4.511180 0.289932 1.063618  
H 0 -2.678163 1.129139 0.315628  
H 0 -3.751867 0.342606 -1.807384  
H 0 3.742380 -5.521776 -0.641536  
H 0 5.948259 -2.711974 -0.518318  
H 0 3.368654 0.228642 1.006779  
H 0 4.582313 0.359579 -0.264796  
H 0 1.642088 1.200710 -0.555728  
H 0 2.867613 1.345953 -1.809662  
H 0 2.962536 2.756025 0.916388  
H 0 4.189919 2.898102 -0.334546  
H 0 1.255650 3.738143 -0.646448  
H 0 2.481797 3.880498 -1.896900  
H 0 2.158718 6.074147 -0.731173  
H 0 3.797036 5.470421 -0.433826  
H 0 2.560033 5.328066 0.824219  
H 0 -0.960851 -1.277469 0.226856  
H 0 3.112910 -2.712675 1.753108  
H 0 4.509099 -1.616282 1.822733  
H 0 4.749799 -3.360552 1.592337

Free Energy (PCM/B3LYP/6-31G\*) = -1642.024232

Number of imaginary frequencies = 0

#### 4-3Z-c7

B3LYP/6-31G\* geometry

O 0 2.113924 -1.286310 -0.243899  
C 0 2.152872 -3.665840 -0.553087  
C 0 4.176268 -2.585147 0.332672  
C 0 3.628910 -3.835803 -0.408919  
C 0 3.577074 -1.324562 -0.363075  
C 0 1.526768 -2.470223 -0.453503  
C 0 0.078702 -2.652580 -0.589892  
N 0 -0.085945 -4.035877 -0.757116  
C 0 1.138285 -4.701673 -0.721708  
S 0 -2.588186 -1.999262 -0.624282  
C 0 -3.204915 -0.373392 -1.244403  
C 0 -4.607333 -0.108191 -0.695256  
C 0 -4.634160 0.072079 0.822069  
O 0 -5.471729 -1.166298 -1.050473  
O 0 -5.400936 -0.545349 1.535394  
O 0 -3.767830 0.993194 1.255408  
O 0 1.300406 -5.923959 -0.795600

O 0 3.971795 -5.022606 0.305931  
O 0 5.586085 -2.482808 0.104133  
C 0 4.092684 0.010168 0.159231  
C 0 3.666252 1.208361 -0.700840  
C 0 4.195108 2.543161 -0.161244  
C 0 3.782309 3.750961 -1.012171  
C 0 4.310002 5.081633 -0.465720  
C 0 -0.862369 -1.687616 -0.553999  
C 0 3.881920 -2.632606 1.835780  
H 0 4.120463 -3.855989 -1.395292  
H 0 3.795697 -1.409645 -1.436133  
H 0 -0.973760 -4.510763 -0.838728  
H 0 -3.241362 -0.400464 -2.335610  
H 0 -2.515264 0.412811 -0.930060  
H 0 -4.955758 0.842101 -1.132537  
H 0 -5.975546 -1.384519 -0.242461  
H 0 -3.859540 1.067625 2.225688  
H 0 3.366740 -5.716445 -0.018636  
H 0 5.975546 -3.323333 0.399048  
H 0 3.744478 0.151241 1.189791  
H 0 5.185584 -0.053328 0.195593  
H 0 2.570790 1.246251 -0.759308  
H 0 4.027126 1.062158 -1.729381  
H 0 3.836380 2.686823 0.868844  
H 0 5.292745 2.501562 -0.098850  
H 0 2.685543 3.790309 -1.075570  
H 0 4.142467 3.608699 -2.040952  
H 0 3.998629 5.923959 -1.094253  
H 0 5.406277 5.084762 -0.422417  
H 0 3.938244 5.267354 0.549683  
H 0 -0.540876 -0.659238 -0.422505  
H 0 2.807616 -2.620808 2.043070  
H 0 4.343296 -1.776986 2.335610  
H 0 4.295145 -3.550577 2.261695

Free Energy (PCM/B3LYP/6-31G\*) = -1642.024172

Number of imaginary frequencies = 0

#### 4-3Z-c8

B3LYP/6-31G\* geometry

O 0 2.267619 -1.335270 -0.393308  
C 0 2.580106 -3.694674 -0.699459  
C 0 4.457355 -2.390500 0.208294  
C 0 4.063988 -3.697293 -0.535012  
C 0 3.726862 -1.207944 -0.498231  
C 0 1.820445 -2.578474 -0.601686  
C 0 0.403336 -2.926520 -0.737338  
N 0 0.398516 -4.316460 -0.940792  
C 0 1.689966 -4.839652 -0.859512  
S 0 -2.308725 -2.563386 -0.974586  
C 0 -3.200149 -1.244569 -0.043833  
C 0 -4.599581 -1.052585 -0.653429  
C 0 -5.379689 -0.042859 0.187681  
O 0 -5.321977 -2.261993 -0.721001  
O 0 -6.327673 -0.362410 0.876835  
O 0 -4.884174 1.196744 0.100615  
O 0 1.988256 -6.037799 -0.893888  
O 0 4.527416 -4.836854 0.188593  
O 0 5.849206 -2.129905 -0.004692  
C 0 4.083528 0.178368 0.022186  
C 0 3.530677 1.317720 -0.845858  
C 0 3.917484 2.705245 -0.319013  
C 0 3.379858 3.855262 -1.180262  
C 0 3.769646 5.238850 -0.649952  
C 0 -0.645165 -2.080354 -0.689462  
C 0 4.153351 -2.467166 1.708367  
H 0 4.567901 -3.664868 -1.514789  
H 0 3.963352 -1.271361 -1.569007  
H 0 -0.428245 -4.895209 -0.877257  
H 0 -2.625432 -0.317703 -0.114469  
H 0 -3.276242 -1.541278 1.006162  
H 0 -4.495584 -0.658729 -1.670705  
H 0 -5.897877 -2.281571 0.066828  
H 0 -5.407723 1.777736 0.687278  
H 0 3.991360 -5.590964 -0.123528  
H 0 6.327673 -2.916716 0.306925  
H 0 3.714885 0.282987 1.050088  
H 0 5.176332 0.239285 0.065540



H O 2.437240 1.239376 -0.901507  
H O 3.902876 1.201969 -1.874278  
H O 3.546994 2.820343 0.710525  
H O 5.013537 2.779065 -0.258670  
H O 2.284691 3.780774 -1.239873  
H O 3.749932 3.739898 -2.208933  
H O 3.371224 6.037799 -1.285935  
H O 4.859910 5.355186 -0.611639  
H O 3.384272 5.396851 0.365098  
H O -0.451625 -1.027274 -0.510244  
H O 3.082932 -2.581375 1.903850  
H O 4.505078 -1.561435 2.208933  
H O 4.667170 -3.328496 2.142865  
Free Energy (PCM/B3LYP/6-31G\*) = -1642.023823  
Number of imaginary frequencies = 0

#### 4-3Z-c9

B3LYP/6-31G\* geometry  
O O -1.984530 -1.820143 0.858697  
C O -2.565481 -3.607905 -0.652832  
C O -4.123500 -3.039302 -1.173571  
C O -3.965046 -3.809611 -0.170689  
C O -3.424311 -1.651604 -1.140285  
C O -1.723107 -2.676201 -0.139143  
C O -0.421306 -2.747750 -0.805727  
N O -0.555206 -3.797572 -1.724914  
C O -1.851194 -4.322727 -1.717116  
S O 2.205077 -2.163459 -1.350773  
C O 2.987114 -0.521497 -1.069058  
C O 3.566522 -0.308625 0.336706  
C O 4.581852 -1.382173 0.720594  
O O 2.548779 -0.263293 1.312580  
O O 4.478357 -2.042359 1.736094  
O O 5.580604 -1.493732 -0.160660  
O O -2.266774 -5.200387 -2.472250  
O O -4.941066 -3.351326 -1.118524  
O O -3.498858 -3.822468 2.202989  
C O -4.005482 -0.603127 0.189850  
C O -3.303941 0.759121 0.284074  
C O -3.937816 1.814509 -0.631007  
C O -3.252038 3.184154 -0.546535  
C O -3.886602 4.233898 -1.464653  
C O 0.648956 -1.966765 -0.556683  
C O -5.587022 -2.919464 1.589253  
H O -4.145622 -4.870385 0.053508  
H O -3.423032 -1.268999 2.164624  
H O 0.110827 -4.008660 -2.455355  
H O 2.253073 0.258935 -1.280925  
H O 3.783351 -0.453693 -1.814391  
H O 4.106249 0.651746 0.313800  
H O 2.785808 -0.934003 1.982301  
H O 6.189484 -2.191348 0.152317  
H O -4.742682 -3.803563 -1.955609  
H O -2.537282 -3.789647 2.068360  
H O -3.975751 -0.981503 -0.837590  
H O -5.065950 -0.479287 0.440573  
H O -2.242956 0.644678 0.028470  
H O -3.335153 1.112820 1.325200  
H O -3.908639 1.458337 -1.671555  
H O -5.002425 1.926296 -0.376895  
H O -2.188008 3.071830 -0.798921  
H O -3.282874 3.540179 0.493087  
H O -3.376437 5.200387 -1.379771  
H O -4.943278 4.391346 -1.214895  
H O -3.837968 3.922033 -2.515418  
H O 0.584075 -1.196285 0.202203  
H O -6.189484 -2.448035 0.812261  
H O -5.671771 -2.341406 2.515418  
H O -5.985476 -3.922311 1.773878  
Free Energy (PCM/B3LYP/6-31G\*) = -1642.023746  
Number of imaginary frequencies = 0

#### 4-3Z-c10

B3LYP/6-31G\* geometry  
O O 0.652724 -0.568253 -0.174220  
C O 0.489219 -2.897844 -0.721581  
C O 2.696735 -2.000966 -0.101695

C O 1.954297 -3.136743 -0.862008  
C O 2.073979 -0.643022 -0.554912  
C O -0.033859 -1.696095 -0.384332  
C O -1.489046 -1.803354 -0.257432  
N O -1.771819 -3.146810 -0.562386  
C O -0.597321 -3.867904 -0.785491  
S O -4.089037 -0.999881 0.120167  
C O -4.599834 0.461942 1.114207  
C O -4.584407 1.802755 0.366027  
C O -5.418560 1.772458 -0.912186  
O O -3.268384 2.202231 0.050307  
O O -4.959376 2.078822 -1.995296  
O O -6.683654 1.396768 -0.701002  
O O -0.521619 -5.087150 -0.971726  
O O 2.350691 -4.408812 -0.349383  
O O 4.055769 -1.967662 -0.549200  
C O 2.690071 0.642657 -0.000941  
C O 4.007719 1.087125 -0.653764  
C O 4.456297 2.468114 -0.157860  
C O 5.770613 2.944206 -0.789992  
C O 6.213034 4.324224 -0.292534  
C O -2.342449 -0.810943 0.063520  
C O 2.644724 -2.199726 1.417383  
H O 2.266944 -3.063494 -1.916447  
H O 2.097394 -0.615815 -1.652398  
H O -2.656507 -3.599057 -0.374794  
H O -3.958227 0.532150 1.995296  
H O -5.615127 0.233829 1.447777  
H O -5.049106 2.543088 1.036934  
H O -3.258970 2.365060 -0.913087  
H O -7.153292 1.406451 -1.558214  
H O 1.643067 -5.033421 -0.599417  
H O 4.412096 -2.860841 -0.404089  
H O 1.937964 1.425753 -0.163331  
H O 2.814890 0.559399 1.085126  
H O 3.879384 1.118505 -1.745627  
H O 4.790262 0.348455 -0.455168  
H O 3.666361 3.205433 -0.365207  
H O 4.570077 2.443035 0.936271  
H O 5.658512 2.967824 -1.883354  
H O 6.559989 2.208550 -0.580208  
H O 7.153292 4.636159 -0.761739  
H O 6.366363 4.322593 0.793835  
H O 5.457754 5.087150 -0.518928  
H O -1.955761 0.181320 0.262583  
H O 1.623776 -2.138765 1.805345  
H O 3.253427 -1.441725 1.917024  
H O 3.041955 -3.186299 1.669479  
Free Energy (PCM/B3LYP/6-31G\*) = -1642.023580  
Number of imaginary frequencies = 0

#### 4-3Z-c11

B3LYP/6-31G\* geometry  
O O -1.052124 0.089025 -0.569495  
C O 0.400857 1.940119 -1.037926  
C O -1.814443 2.429407 -0.094430  
C O -0.634710 3.008250 -0.922296  
C O -2.171537 1.032402 -0.690936  
C O 0.139382 0.627011 -0.854023  
C O 1.384278 -0.147563 -0.974044  
N O 2.380390 0.809908 -1.190609  
C O 1.838619 2.090968 -1.253866  
S O 2.921375 -2.512580 -0.940717  
C O 4.207753 -1.637404 0.066118  
C O 5.411114 -1.168588 -0.763424  
C O 6.518387 -0.611907 0.133649  
O O 5.048560 -0.165482 -1.697693  
O O 6.980848 0.500814 -0.027824  
O O 6.919704 -1.476214 1.068407  
O O 2.471796 3.137127 -1.431618  
O O -0.130022 4.190202 -0.301864  
O O -2.983312 3.224481 -0.322193  
C O -3.382967 0.355609 -0.063421  
C O -3.856297 -0.889856 -0.826924  
C O -5.076479 -1.551605 -0.175100  
C O -5.576357 -2.790541 -0.929703  
C O -6.792116 -3.448325 -0.269008

C 0 1.486794 -1.488088 -0.864222  
 C 0 -1.492534 2.371881 1.403030  
 H 0 -1.042885 3.268329 -1.912582  
 H 0 -2.341583 1.170813 -1.1767055  
 H 0 3.352195 0.584363 -1.415174  
 H 0 4.546605 -2.360620 0.810515  
 H 0 3.738310 -0.800143 0.586642  
 H 0 5.834785 -2.032313 -1.295640  
 H 0 5.692435 0.561940 -1.574137  
 H 0 7.635667 -1.058635 1.586944  
 H 0 0.763314 4.326990 -0.671000  
 H 0 -2.743539 4.138375 -0.093153  
 H 0 -3.145380 0.086337 0.973093  
 H 0 -4.187736 1.097761 -0.025413  
 H 0 -3.035826 -1.616330 -0.889390  
 H 0 -4.102268 -0.609141 -1.861464  
 H 0 -4.827473 -1.833491 0.858804  
 H 0 -5.892736 -0.817468 -0.102698  
 H 0 -4.759541 -3.522451 -1.004768  
 H 0 -5.828551 -2.507980 -1.961725  
 H 0 -7.126726 -4.326990 -0.832485  
 H 0 -7.635667 -2.749470 -0.208199  
 H 0 -6.558969 -3.775312 0.751967  
 H 0 0.567178 -2.050174 -0.736106  
 H 0 -0.659849 1.694952 1.616414  
 H 0 -2.368920 2.033518 1.961725  
 H 0 -1.215121 3.367750 1.758268  
 Free Energy (PCM/B3LYP/6-31G\*) = -1642.023468  
 Number of imaginary frequencies = 0

### 5-3R-c1

B3LYP/6-31G\* geometry  
 O 0 -1.413341 0.407573 -0.030300  
 C 0 -3.623934 -0.332632 -0.542766  
 C 0 -1.920752 -2.048478 -0.077623  
 C 0 -3.283821 -1.771789 -0.772285  
 C 0 -0.935245 -0.912124 -0.486214  
 C 0 -2.717645 0.592296 -0.190645  
 C 0 -3.373879 1.945296 0.033659  
 O 0 -4.781905 1.636238 -0.226719  
 C 0 -4.928513 0.308011 -0.560285  
 C 0 -2.914150 3.029611 -0.925994  
 O 0 -6.018569 -0.178104 -0.802917  
 O 0 -4.271275 -2.660107 -0.257050  
 O 0 -1.344214 -3.231947 -0.636591  
 C 0 -2.067370 -2.192601 1.441656  
 C 0 0.487375 -1.064191 0.033623  
 C 0 1.471794 -0.057016 -0.577960  
 C 0 2.903948 -0.241073 -0.060634  
 C 0 3.900982 0.757295 -0.662672  
 C 0 5.331328 0.564658 -0.148320  
 O 0 -3.226880 2.428765 1.332066  
 H 0 -3.140480 -1.967314 -1.846357  
 H 0 -0.926652 -0.861870 -1.582496  
 H 0 -1.850781 3.230716 -0.7711002  
 H 0 -3.483658 3.942843 -0.733917  
 H 0 -3.073189 2.714087 -1.959733  
 H 0 -5.133650 -2.327390 -0.564590  
 H 0 -1.996098 -3.942843 -0.514052  
 H 0 -2.787870 -2.982610 1.667862  
 H 0 -2.422685 -1.270581 1.911847  
 H 0 -1.105110 -2.460590 1.884900  
 H 0 0.484160 -0.964187 1.125783  
 H 0 0.808217 -2.086527 -0.194136  
 H 0 1.463641 -0.161857 -1.672614  
 H 0 1.133246 0.964453 -0.361515  
 H 0 2.910762 -0.143582 1.035149  
 H 0 3.240332 -1.265717 -0.278037  
 H 0 3.566326 1.780606 -0.440992  
 H 0 3.890133 0.663198 -1.757867  
 H 0 5.380261 0.686120 0.940991  
 H 0 6.018569 1.291721 -0.596160  
 H 0 5.705351 -0.438856 -0.386529  
 H 0 -3.480764 1.729604 1.959733  
 Free Energy (PCM/B3LYP/6-31G\*) = -997.782624  
 Number of imaginary frequencies = 0

### 5-3R-c2

B3LYP/6-31G\* geometry  
 O 0 -1.410565 0.410419 -0.010353  
 C 0 -3.621299 -0.331946 -0.518274  
 C 0 -1.920053 -2.044109 -0.042733  
 C 0 -3.280435 -1.771539 -0.743850  
 C 0 -0.933077 -0.911969 -0.458894  
 C 0 -2.714871 0.592208 -0.167178  
 C 0 -3.373706 1.939182 0.061684  
 O 0 -4.781779 1.634788 -0.208850  
 C 0 -4.928097 0.303340 -0.521564  
 C 0 -2.927789 3.034122 -0.896860  
 O 0 -6.019222 -0.191041 -0.745472  
 O 0 -4.270950 -2.656981 -0.229739  
 O 0 -1.342970 -3.233660 -0.588156  
 C 0 -2.072514 -2.170616 1.477539  
 C 0 0.489175 -1.062090 0.062438  
 C 0 1.473441 -0.054617 -0.548894  
 C 0 2.905492 -0.238572 -0.031193  
 C 0 3.902060 0.762194 -0.630013  
 C 0 5.332358 0.568980 -0.115710  
 O 0 -3.208981 2.277964 1.402893  
 H 0 -3.133211 -1.971179 -1.816766  
 H 0 -0.923844 -0.868124 -1.555477  
 H 0 -1.868936 3.253735 -0.735138  
 H 0 -3.513638 3.942206 -0.719236  
 H 0 -3.075444 2.723075 -1.934211  
 H 0 -5.133949 -2.306437 -0.515948  
 H 0 -1.996665 -3.942206 -0.461840  
 H 0 -2.796380 -2.955817 1.709757  
 H 0 -2.426873 -1.241485 1.934211  
 H 0 -1.112766 -2.436608 1.927499  
 H 0 0.484949 -0.961153 1.154482  
 H 0 0.811020 -2.084375 -0.164156  
 H 0 1.465613 -0.159025 -1.643610  
 H 0 1.134628 0.966685 -0.332114  
 H 0 2.911531 -0.143745 1.064826  
 H 0 3.242924 -1.262387 -0.250862  
 H 0 3.566654 1.784618 -0.405352  
 H 0 3.891657 0.671389 -1.725495  
 H 0 5.380693 0.686728 0.974038  
 H 0 6.019222 1.298135 -0.560730  
 H 0 5.707304 -0.433407 -0.357182  
 H 0 -3.512534 3.193613 1.528778  
 Free Energy (PCM/B3LYP/6-31G\*) = -997.782218  
 Number of imaginary frequencies = 0

### 5-3R-c3

B3LYP/6-31G\* geometry  
 O 0 1.083878 -0.542907 -0.088959  
 C 0 3.277626 0.390962 -0.208161  
 C 0 1.388998 1.939907 0.095790  
 C 0 2.856145 1.814095 -0.401120  
 C 0 0.569737 0.769662 -0.527333  
 C 0 2.408377 -0.620355 -0.057307  
 C 0 3.133370 -1.935586 0.181618  
 O 0 4.533703 -1.508201 0.157147  
 C 0 4.618429 -0.151141 -0.065756  
 C 0 2.907168 -2.978818 -0.899301  
 O 0 5.688969 0.427959 -0.107825  
 O 0 3.680445 2.735242 0.307068  
 O 0 0.806459 3.118365 -0.467591  
 C 0 1.299035 1.978849 1.625833  
 C 0 -0.920225 0.781986 -0.214870  
 C 0 -1.723364 -0.229441 -1.047669  
 C 0 -3.240109 -0.170283 -0.801698  
 C 0 -3.684791 -0.614940 0.599275  
 C 0 -5.208036 -0.606869 0.767650  
 O 0 2.838801 -2.520814 1.411597  
 H 0 2.853970 2.072739 -1.471450  
 H 0 0.722993 0.800474 -1.613610  
 H 0 1.852157 -3.265048 -0.918138  
 H 0 3.514029 -3.860914 -0.678232  
 H 0 3.188957 -2.580747 -1.876768  
 H 0 4.603136 2.490915 0.112548  
 H 0 1.376950 3.860914 -0.205753  
 H 0 1.919022 2.792164 2.011079

H O 1.645129 1.047140 2.083755  
H O 0.264767 2.152833 1.932860  
H O -1.058697 0.593444 0.855136  
H O -1.283837 1.796543 -0.412887  
H O -1.529466 -0.039662 -2.112514  
H O -1.360364 -1.245202 -0.843073  
H O -3.598712 0.852754 -0.989278  
H O -3.737445 -0.808206 -1.545837  
H O -3.235948 0.036249 1.360952  
H O -3.299120 -1.625821 0.794531  
H O -5.618009 0.397678 0.604604  
H O -5.501534 -0.927509 1.773860  
H O -5.688969 -1.281035 0.047955  
H O 2.952884 -1.855293 2.112514  
Free Energy (PCM/B3LYP/6-31G\*) = -997.782109  
Number of imaginary frequencies = 0

### 5-3R-c4

B3LYP/6-31G\* geometry

O O 1.874163 -0.505798 -1.306912  
C O 3.497691 -0.199114 0.429325  
C O 2.511965 1.803823 -0.612303  
C O 3.307679 1.271840 0.617562  
C O 1.361226 0.851925 -1.031187  
C O 2.814012 -0.921496 -0.475743  
C O 3.246739 -2.377254 -0.459631  
O O 4.262348 -2.374957 0.585308  
C O 4.419662 -1.101985 1.105396  
C O 3.858393 -2.867012 -1.761245  
O O 5.224445 -0.876381 1.986715  
O O 2.605904 1.593637 1.823174  
O O 3.393922 1.772922 -1.743842  
C O 1.997489 3.227088 -0.384151  
C O 0.178475 0.736605 -0.067369  
C O -0.918292 -0.216887 -0.564068  
C O -2.138370 -0.246511 0.364995  
C O -3.238818 -1.204982 -0.108502  
C O -4.457545 -1.229372 0.819685  
O O 2.210473 -3.249938 -0.117627  
H O 4.283930 1.780593 0.619676  
H O 1.016548 1.181098 -2.014596  
H O 3.110853 -2.827205 -2.558059  
H O 4.191707 -3.900535 -1.634078  
H O 4.711418 -2.243034 -2.037930  
H O 3.115651 1.214060 2.558059  
H O 4.100321 2.421396 -1.586647  
H O 2.849599 3.900535 -0.233367  
H O 1.360141 3.298580 0.498534  
H O 1.441574 3.572131 -1.262029  
H O 0.537279 0.426719 0.920225  
H O -0.246091 1.739732 0.058334  
H O -1.235338 0.085677 -1.572889  
H O -0.506830 -1.229465 -0.659973  
H O -1.818543 -0.534431 1.377498  
H O -2.554723 0.767925 0.453620  
H O -2.822783 -2.218871 -0.193888  
H O -3.555639 -0.918978 -1.121542  
H O -4.177677 -1.545304 1.832381  
H O -5.224445 -1.922094 0.454288  
H O -4.915441 -0.235446 0.897763  
H O 1.796101 -2.933918 0.704280  
Free Energy (PCM/B3LYP/6-31G\*) = -997.780978  
Number of imaginary frequencies = 0

### 5-3R-c5

B3LYP/6-31G\* geometry

O O 1.896211 -0.456216 -1.333625  
C O 3.510296 -0.188548 0.420216  
C O 2.550324 1.836171 -0.606667  
C O 3.337980 1.285986 0.620979  
C O 1.381846 0.901406 -1.027370  
C O 2.814834 -0.899591 -0.485290  
C O 3.213842 -2.365300 -0.464612  
O O 4.224316 -2.382151 0.585718  
C O 4.406329 -1.114824 1.107071  
C O 3.819572 -2.874360 -1.761474  
O O 5.206106 -0.904941 1.995310

O O 2.635425 1.593490 1.829562  
O O 3.465324 1.930945 -1.708082  
C O 2.059179 3.261448 -0.367662  
C O 0.206791 0.767291 -0.057597  
C O -0.896295 -0.174014 -0.563989  
C O -2.112961 -0.212536 0.369268  
C O -3.218953 -1.159300 -0.114822  
C O -4.435041 -1.192149 0.816558  
O O 2.155683 -3.210660 -0.124499  
H O 4.314354 1.789208 0.619432  
H O 1.029534 1.245531 -2.002898  
H O 3.077518 -2.817941 -2.562366  
H O 4.124848 -3.915761 -1.629021  
H O 4.690691 -2.274452 -2.035156  
H O 3.156970 1.225893 2.562366  
H O 3.741801 1.035200 -1.962406  
H O 2.926598 3.915761 -0.235036  
H O 1.436798 3.328937 0.524947  
H O 1.491748 3.616248 -1.234210  
H O 0.571435 0.439466 0.921950  
H O -0.212789 1.769906 0.089210  
H O -1.216042 0.144923 -1.566840  
H O -0.489601 -1.186879 -0.676568  
H O -1.790740 -0.516900 1.376160  
H O -2.524661 0.802191 0.474389  
H O -2.807538 -2.173588 -0.216346  
H O -3.537515 -0.857056 -1.122581  
H O -4.153674 -1.524539 1.823550  
H O -5.206106 -1.875853 0.443033  
H O -4.888210 -0.197470 0.910889  
H O 1.752559 -2.890368 0.701408  
Free Energy (PCM/B3LYP/6-31G\*) = -997.780935  
Number of imaginary frequencies = 0

### 5-3R-c6

B3LYP/6-31G\* geometry

O O 1.883216 -0.496674 -1.308189  
C O 3.502886 -0.196219 0.433392  
C O 2.525545 1.810670 -0.603108  
C O 3.317986 1.276009 0.622023  
C O 1.368774 0.856926 -1.022724  
C O 2.821543 -0.915514 -0.475590  
C O 3.251011 -2.372163 -0.460607  
O O 4.263058 -2.373871 0.587478  
C O 4.420897 -1.102195 1.111078  
C O 3.865426 -2.861925 -1.760910  
O O 5.222800 -0.880428 1.995811  
O O 2.610820 1.598815 1.823099  
O O 3.508529 1.801617 -1.649064  
C O 2.016539 3.235326 -0.371454  
C O 0.185401 0.734385 -0.058710  
C O -0.912539 -0.216099 -0.558595  
C O -2.132859 -0.247277 0.370158  
C O -3.234986 -1.201968 -0.107050  
C O -4.454693 -1.226011 0.819868  
O O 2.211403 -3.242881 -0.123084  
H O 4.291680 1.784798 0.615040  
H O 1.007958 1.185648 -2.002731  
H O 3.120440 -2.819399 -2.559994  
H O 4.195623 -3.896475 -1.633923  
H O 4.720962 -2.239891 -2.034175  
H O 3.122905 1.226901 2.559994  
H O 3.096247 2.170568 -2.447757  
H O 2.876098 3.896475 -0.223531  
H O 1.372945 3.305175 0.506843  
H O 1.456991 3.590567 -1.245281  
H O 0.546517 0.419156 0.926314  
H O -0.238266 1.737130 0.073849  
H O -1.229472 0.090276 -1.566381  
H O -0.502110 -1.228795 -0.658073  
H O -1.813770 -0.539371 1.381680  
H O -2.547404 0.767589 0.462321  
H O -2.821204 -2.216571 -0.194827  
H O -3.550173 -0.912428 -1.119607  
H O -4.176546 -1.545133 1.832032  
H O -5.222800 -1.916050 0.451942  
H O -4.910407 -0.231243 0.900014

H 0 1.796577 -2.927852 0.698959  
Free Energy (PCM/B3LYP/6-31G\*) = -997.780848  
Number of imaginary frequencies = 0

### 5-3R-c7

B3LYP/6-31G\* geometry

O 0 1.895521 -0.401078 -1.330476  
C 0 3.514619 -0.118699 0.416046  
C 0 2.543339 1.897642 -0.615852  
C 0 3.335249 1.355445 0.612144  
C 0 1.377790 0.956271 -1.030645  
C 0 2.818378 -0.835475 -0.483273  
C 0 3.228719 -2.294840 -0.458505  
O 0 4.255609 -2.301845 0.577942  
C 0 4.414781 -1.037153 1.107728  
C 0 3.842348 -2.809105 -1.753218  
O 0 5.206128 -0.818368 2.002083  
O 0 2.632622 1.663388 1.820567  
O 0 3.455765 1.992143 -1.719626  
C 0 2.046761 3.321826 -0.381564  
C 0 0.203690 0.823149 -0.059477  
C 0 -0.897763 -0.121463 -0.562927  
C 0 -2.115963 -0.157751 0.368364  
C 0 -3.219257 -1.108393 -0.114389  
C 0 -4.437307 -1.140583 0.814403  
O 0 2.121440 -3.035337 -0.042896  
H 0 4.309040 1.863921 0.608349  
H 0 1.023608 1.294757 -2.007518  
H 0 3.096786 -2.776402 -2.552363  
H 0 4.176506 -3.843313 -1.617904  
H 0 4.704421 -2.201718 -2.040831  
H 0 3.147320 1.284241 2.552363  
H 0 3.747068 1.097438 -1.960777  
H 0 2.911701 3.980129 -0.252548  
H 0 1.425233 3.389971 0.511599  
H 0 1.476585 3.671296 -1.248511  
H 0 0.569704 0.498056 0.920320  
H 0 -0.217354 1.825604 0.084624  
H 0 -1.216618 0.192531 -1.567732  
H 0 -0.489004 -1.133851 -0.669133  
H 0 -1.795013 -0.457885 1.376887  
H 0 -2.529739 0.856653 0.468815  
H 0 -2.805502 -2.122172 -0.211351  
H 0 -3.536363 -0.810502 -1.123951  
H 0 -4.157401 -1.468872 1.823133  
H 0 -5.206128 -1.827246 0.441600  
H 0 -4.892838 -0.146563 0.904285  
H 0 2.326360 -3.980129 -0.149814  
Free Energy (PCM/B3LYP/6-31G\*) = -997.780693  
Number of imaginary frequencies = 0

### 5-3R-c8

B3LYP/6-31G\* geometry

O 0 1.872632 -0.432895 -1.296863  
C 0 3.501400 -0.090796 0.427563  
C 0 2.487697 1.890862 -0.626217  
C 0 3.291276 1.378218 0.606130  
C 0 1.346638 0.922542 -1.034398  
C 0 2.822343 -0.828152 -0.467798  
C 0 3.286843 -2.271129 -0.450278  
O 0 4.319029 -2.245704 0.579629  
C 0 4.440177 -0.973852 1.106402  
C 0 3.912451 -2.752796 -1.752022  
O 0 5.236703 -0.729188 1.990846  
O 0 2.585566 1.699407 1.809780  
O 0 3.367471 1.860578 -1.759732  
C 0 1.958908 3.310693 -0.409316  
C 0 0.165002 0.805390 -0.069620  
C 0 -0.930527 -0.150080 -0.564932  
C 0 -2.151352 -0.178752 0.363193  
C 0 -3.250694 -1.138738 -0.109847  
C 0 -4.470782 -1.162025 0.816582  
O 0 2.212337 -3.059562 -0.034103  
H 0 4.260548 1.900380 0.604606  
H 0 0.998594 1.238538 -2.021020  
H 0 3.160126 -2.748683 -2.545497  
H 0 4.292360 -3.772073 -1.623788

H 0 4.744342 -2.106442 -2.043420  
H 0 3.090220 1.314682 2.545497  
H 0 4.067448 2.517422 -1.608630  
H 0 2.804780 3.994058 -0.268114  
H 0 1.324357 3.383846 0.475235  
H 0 1.396151 3.642086 -1.288085  
H 0 0.525659 0.496712 0.917543  
H 0 -0.261671 1.807688 0.055671  
H 0 -1.247326 0.150387 -1.574544  
H 0 -0.518280 -1.162317 -0.657609  
H 0 -1.832117 -0.464982 1.376310  
H 0 -2.568548 0.835558 0.449798  
H 0 -2.833899 -2.152529 -0.192531  
H 0 -3.566293 -0.854994 -1.123948  
H 0 -4.192113 -1.475593 1.830331  
H 0 -5.236703 -1.856060 0.451564  
H 0 -4.929488 -0.168245 0.891883  
H 0 2.458389 -3.994058 -0.144214  
Free Energy (PCM/B3LYP/6-31G\*) = -997.780553  
Number of imaginary frequencies = 0

### 5-3R-c9

B3LYP/6-31G\* geometry

O 0 1.880693 -0.426505 -1.296906  
C 0 3.506844 -0.087861 0.431415  
C 0 2.498827 1.896009 -0.617923  
C 0 3.300054 1.382323 0.609825  
C 0 1.352289 0.924520 -1.025315  
C 0 2.830189 -0.823296 -0.467066  
C 0 3.293432 -2.266596 -0.450660  
O 0 4.323143 -2.243479 0.581615  
C 0 4.443501 -0.972643 1.111293  
C 0 3.921608 -2.747546 -1.751432  
O 0 5.237609 -0.730405 1.998431  
O 0 2.588382 1.703904 1.808808  
O 0 3.478689 1.888815 -1.667133  
C 0 1.974244 3.316955 -0.398362  
C 0 0.170563 0.799751 -0.059776  
C 0 -0.926318 -0.152423 -0.558476  
C 0 -2.147602 -0.182819 0.369034  
C 0 -3.248875 -1.138165 -0.108901  
C 0 -4.470289 -1.161506 0.815773  
O 0 2.217167 -3.054597 -0.037942  
H 0 4.266051 1.905727 0.599128  
H 0 0.987488 1.239255 -2.008498  
H 0 3.171113 -2.742161 -2.546657  
H 0 4.300298 -3.767299 -1.623341  
H 0 4.754797 -2.101720 -2.040263  
H 0 3.095223 1.326732 2.546657  
H 0 3.060032 2.248215 -2.466876  
H 0 2.826875 3.989190 -0.260535  
H 0 1.333579 3.388184 0.481960  
H 0 1.407071 3.657414 -1.273157  
H 0 0.533986 0.485201 0.924483  
H 0 -0.255116 1.801632 0.073032  
H 0 -1.242857 0.152162 -1.567025  
H 0 -0.515258 -1.164829 -0.654969  
H 0 -1.829535 -0.474170 1.381039  
H 0 -2.562594 0.832031 0.459863  
H 0 -2.834709 -2.152763 -0.194795  
H 0 -3.562367 -0.849822 -1.122370  
H 0 -4.193881 -1.479466 1.828765  
H 0 -5.237609 -1.852109 0.447198  
H 0 -4.926379 -0.166747 0.894015  
H 0 2.462910 -3.989190 -0.147912  
Free Energy (PCM/B3LYP/6-31G\*) = -997.780411  
Number of imaginary frequencies = 0

### 5-3R-c10

B3LYP/6-31G\* geometry

O 0 2.182089 -0.941974 -0.012958  
C 0 3.886489 0.660587 -0.482453  
C 0 1.637434 1.497961 0.083700  
C 0 2.976554 1.836657 -0.633370  
C 0 1.182561 0.083217 -0.391490  
C 0 3.443974 -0.569975 -0.183733  
C 0 4.599633 -1.547794 -0.039861

O 0 5.752453 -0.678472 -0.284758  
C 0 5.337562 0.610582 -0.540712  
C 0 4.595466 -2.674500 -1.059337  
O 0 6.129390 1.509801 -0.758081  
O 0 3.516665 3.032446 -0.078109  
O 0 0.634523 2.398947 -0.391575  
C 0 1.762529 1.600167 1.608648  
C 0 -0.144784 -0.458495 0.138736  
C 0 -1.406940 0.149450 -0.491239  
C 0 -2.683247 -0.567955 -0.032050  
C 0 -3.961597 0.021549 -0.641661  
C 0 -5.235117 -0.696261 -0.182847  
O 0 4.695844 -2.117616 1.228146  
H 0 2.735123 2.003551 -1.694644  
H 0 1.166508 0.087868 -1.488473  
H 0 3.707284 -3.295704 -0.916095  
H 0 5.489032 -3.288234 -0.917636  
H 0 4.591108 -2.269919 -2.074156  
H 0 4.427053 3.111505 -0.415024  
H 0 0.977071 3.295704 -0.234701  
H 0 2.129424 2.593306 1.879328  
H 0 2.458686 0.862257 2.018790  
H 0 0.784969 1.452283 2.074156  
H 0 -0.131389 -1.536012 -0.070569  
H 0 -0.179225 -0.358825 1.229893  
H 0 -1.469514 1.213572 -0.244826  
H 0 -1.330907 0.088779 -1.586612  
H 0 -2.617126 -1.635433 -0.290248  
H 0 -2.752368 -0.523204 1.065136  
H 0 -3.892188 -0.020927 -1.737971  
H 0 -4.027801 1.087452 -0.381400  
H 0 -5.212268 -1.757883 -0.458875  
H 0 -6.129390 -0.253043 -0.636055  
H 0 -5.350415 -0.640153 0.906792  
H 0 4.667429 -1.409969 1.895584  
Free Energy (PCM/B3LYP/6-31G\*) = -997.780297  
Number of imaginary frequencies = 0

### 5-3R-c11

B3LYP/6-31G\* geometry

O 0 1.397583 -0.262215 -0.033131  
C 0 3.631832 0.450269 -0.544922  
C 0 1.916728 2.175046 -0.106605  
C 0 3.292551 1.889980 -0.780139  
C 0 0.925772 1.047048 -0.517649  
C 0 2.702096 -0.456244 -0.192541  
C 0 3.313591 -1.828000 0.024940  
O 0 4.711199 -1.579730 -0.282289  
C 0 4.911600 -0.255240 -0.641968  
C 0 2.773770 -2.907966 -0.898138  
O 0 6.010123 0.133433 -0.972834  
O 0 4.321415 2.732236 -0.281126  
O 0 1.488330 3.400332 -0.713633  
C 0 2.040102 2.330972 1.410527  
C 0 -0.506566 1.208176 -0.027716  
C 0 -1.475097 0.168555 -0.610457  
C 0 -2.916942 0.366235 -0.126432  
C 0 -3.896383 -0.667537 -0.696740  
C 0 -5.335873 -0.463963 -0.213145  
O 0 3.182395 -2.285672 1.338824  
H 0 3.158818 2.078302 -1.856941  
H 0 0.934776 0.981636 -1.613606  
H 0 1.709753 -3.063665 -0.701444  
H 0 3.313354 -3.840396 -0.711606  
H 0 2.907089 -2.616253 -1.942554  
H 0 4.040061 3.640829 -0.484821  
H 0 0.865165 3.840396 -0.113438  
H 0 2.802079 3.077453 1.643952  
H 0 2.322646 1.391228 1.893570  
H 0 1.087671 2.655075 1.843639  
H 0 -0.525683 1.159328 1.067814  
H 0 -0.839707 2.213746 -0.312473  
H 0 -1.447119 0.223652 -1.708252  
H 0 -1.133154 -0.838809 -0.340920  
H 0 -2.941769 0.320529 0.972449  
H 0 -3.257075 1.376678 -0.397869  
H 0 -3.556890 -1.676446 -0.422679

H 0 -3.869228 -0.624126 -1.794789  
H 0 -5.400286 -0.535644 0.879775  
H 0 -6.010123 -1.217059 -0.637002  
H 0 -5.714681 0.524091 -0.502877  
H 0 3.503892 -1.593311 1.942554  
Free Energy (PCM/B3LYP/6-31G\*) = -997.780252  
Number of imaginary frequencies = 0

### 5-3S-c1

B3LYP/6-31G\* geometry

O 0 1.412259 -0.657214 -0.198677  
C 0 3.623585 0.100165 -0.681326  
C 0 1.918711 1.800481 -0.175519  
C 0 3.281570 1.543400 -0.878310  
C 0 0.932580 0.675722 -0.613637  
C 0 2.717526 -0.835168 -0.357306  
C 0 3.375189 -2.192642 -0.166991  
O 0 4.782969 -1.875777 -0.419462  
C 0 4.929934 -0.535612 -0.701581  
C 0 3.237239 -2.766761 1.232943  
O 0 6.022578 -0.035821 -0.901909  
O 0 4.269125 2.419810 -0.343721  
O 0 1.341462 2.998688 -0.701488  
C 0 2.067057 1.901962 1.347017  
C 0 -0.487671 0.811954 -0.082940  
C 0 -1.474857 -0.179567 -0.715223  
C 0 -2.904111 -0.008213 -0.185424  
C 0 -3.904934 -0.992111 -0.804681  
C 0 -5.332260 -0.810300 -0.278020  
O 0 2.934435 -3.156787 -1.071634  
H 0 3.136469 1.764115 -1.947305  
H 0 0.919021 0.657445 -1.710791  
H 0 2.183052 -2.959586 1.449290  
H 0 3.633828 -2.066723 1.971963  
H 0 3.792244 -3.706904 1.290158  
H 0 5.133530 2.079048 -0.637235  
H 0 1.991633 3.706904 -0.556425  
H 0 2.793827 2.679771 1.594270  
H 0 2.415268 0.964306 1.791013  
H 0 1.107077 2.165260 1.797951  
H 0 -0.478449 0.683122 1.006148  
H 0 -0.810616 1.839649 -0.281871  
H 0 -1.472650 -0.046881 -1.806877  
H 0 -1.135305 -1.206166 -0.526545  
H 0 -2.904338 -0.131543 0.907772  
H 0 -3.241673 1.021261 -0.376542  
H 0 -3.569770 -2.020384 -0.608250  
H 0 -3.900249 -0.872999 -1.897479  
H 0 -5.375132 -0.956192 0.808543  
H 0 -6.022578 -1.526667 -0.738192  
H 0 -5.706806 0.198564 -0.491492  
H 0 2.977377 -2.789422 -1.971963  
Free Energy (PCM/B3LYP/6-31G\*) = -997.783130  
Number of imaginary frequencies = 0

### 5-3S-c2

B3LYP/6-31G\* geometry

O 0 1.412699 -0.539537 -0.209900  
C 0 3.623103 0.218019 -0.695124  
C 0 1.918536 1.917786 -0.186131  
C 0 3.280387 1.661115 -0.890519  
C 0 0.932781 0.792919 -0.624626  
C 0 2.717075 -0.716533 -0.372421  
C 0 3.375564 -2.070430 -0.187441  
O 0 4.786274 -1.753774 -0.429298  
C 0 4.929066 -0.418376 -0.727290  
C 0 3.252665 -2.654631 1.212838  
O 0 6.019262 0.081993 -0.941556  
O 0 4.268766 2.537860 -0.357190  
O 0 1.340528 3.116546 -0.710377  
C 0 2.068086 2.018420 1.336347  
C 0 -0.487949 0.928561 -0.095117  
C 0 -1.473308 -0.064792 -0.727398  
C 0 -2.903867 0.106250 -0.201111  
C 0 -3.902115 -0.880138 -0.820600  
C 0 -5.331019 -0.698763 -0.298108  
O 0 2.898498 -2.921026 -1.182399

H O 3.134080 1.882410 -1.959202  
H O 0.920099 0.774793 -1.721764  
H O 2.202597 -2.867358 1.431336  
H O 3.640807 -1.956878 1.959202  
H O 3.827123 -3.585150 1.274446  
H O 5.132000 2.198863 -0.656209  
H O 1.993965 3.823116 -0.572089  
H O 2.794322 2.796810 1.583351  
H O 2.417631 1.080783 1.779297  
H O 1.108182 2.280462 1.788214  
H O -0.479700 0.801142 0.994177  
H O -0.811699 1.955689 -0.295676  
H O -1.468848 0.065764 -1.819287  
H O -1.133256 -1.090763 -0.536272  
H O -2.906560 -0.014658 0.892376  
H O -3.242134 1.134932 -0.395265  
H O -3.566298 -1.907599 -0.620999  
H O -3.894697 -0.763571 -1.913653  
H O -5.376605 -0.842089 0.788698  
H O -6.019262 -1.417058 -0.758390  
H O -5.706208 0.309137 0.514989  
H O 3.206601 -3.823116 -0.988929  
Free Energy (PCM/B3LYP/6-31G\*) = -997.782655  
Number of imaginary frequencies = 0

### 5-3S-c3

B3LYP/6-31G\* geometry  
O O 1.083389 -0.709659 -0.200383  
C O 3.279305 0.221492 -0.294870  
C O 1.398787 1.765198 0.065232  
C O 2.862264 1.650955 -0.446302  
C O 0.571459 0.618954 -0.590835  
C O 2.407441 -0.791244 -0.171278  
C O 3.128472 -2.113461 0.034256  
O O 4.530970 -1.690311 0.015025  
C O 4.617846 -0.326327 -0.156148  
C O 2.831430 -2.790648 1.361594  
O O 5.687933 0.255746 -0.155746  
O O 3.695874 2.546805 0.282740  
O O 0.815072 2.962881 -0.454620  
C O 1.322027 1.753440 1.596283  
C O -0.916541 0.624602 -0.269035  
C O -1.726663 -0.354421 -1.133273  
C O -3.241742 -0.302901 -0.875624  
C O -3.678088 -0.801062 0.509779  
C O -5.200087 -0.796334 0.689284  
O O 2.895847 -3.038377 -0.981630  
H O 2.852929 1.941185 -1.508517  
H O 0.717670 0.685931 -1.676443  
H O 1.773655 -3.063268 1.406814  
H O 3.065933 -2.120072 2.191585  
H O 3.438615 -3.695959 1.444779  
H O 4.616204 2.282780 0.101609  
H O 1.385656 3.695959 -0.167623  
H O 1.940947 2.557705 2.001833  
H O 1.679493 0.809737 2.019610  
H O 0.289794 1.910687 1.918871  
H O -1.049276 0.398065 0.794352  
H O -1.278221 1.646592 -0.428303  
H O -1.539353 -0.125547 -2.191585  
H O -1.363586 -1.377345 -0.968715  
H O -3.599959 0.727113 -1.021304  
H O -3.744696 -0.910924 -1.640711  
H O -3.222080 -0.181540 1.293316  
H O -3.293829 -1.819853 0.662441  
H O -5.608755 0.215057 0.571888  
H O -5.487072 -1.158608 1.683169  
H O -5.687933 -1.438483 -0.054636  
H O 3.034235 -2.604053 -1.841490  
Free Energy (PCM/B3LYP/6-31G\*) = -997.781846  
Number of imaginary frequencies = 0

### 5-3S-c4

B3LYP/6-31G\* geometry  
O O 1.883754 -0.260338 -1.596562  
C O 3.527348 0.040458 0.124731  
C O 2.503666 2.047241 -0.871951

C O 3.316614 1.507315 0.342203  
C O 1.350004 1.090354 -1.284937  
C O 2.833921 -0.683788 -0.772490  
C O 3.292174 -2.134050 -0.784253  
O O 4.330162 -2.124649 0.239379  
C O 4.468127 -0.861638 0.782986  
C O 2.210917 -3.128734 -0.395330  
O O 5.264872 -0.637941 1.670718  
O O 2.613442 1.781529 1.558260  
O O 3.402736 2.169516 -1.983837  
C O 1.986884 3.461202 -0.618428  
C O 0.181880 0.936336 -0.310240  
C O -0.947779 0.046429 -0.848836  
C O -2.144961 -0.032316 0.106849  
C O -3.277249 -0.927827 -0.412511  
C O -4.474163 -1.000979 0.541059  
O O 3.825950 -2.542333 -2.006890  
H O 4.278544 2.037599 0.339267  
H O 0.987131 1.430392 -2.258140  
H O 1.408005 -3.108570 -1.137005  
H O 1.800636 -2.881226 0.586451  
H O 2.644057 -4.132077 -0.363779  
H O 3.143587 1.410117 2.282910  
H O 3.699115 1.282349 -2.244848  
H O 2.843815 4.132077 -0.501349  
H O 1.382052 3.513633 0.287085  
H O 1.394981 3.807562 -1.471908  
H O 0.550593 0.556126 0.648822  
H O -0.216096 1.938498 -0.111319  
H O -1.283243 0.434716 -1.821696  
H O -0.564094 -0.964339 -1.035670  
H O -1.806957 -0.406296 1.084689  
H O -2.536167 0.980178 0.286012  
H O -2.885867 -1.940032 -0.587582  
H O -3.611276 -0.556526 -1.391817  
H O -4.178070 -1.402648 1.518157  
H O -5.264872 -1.646181 0.141038  
H O -4.907462 -0.007190 0.709303  
H O 4.507855 -1.905378 -2.282910  
Free Energy (PCM/B3LYP/6-31G\*) = -997.781566  
Number of imaginary frequencies = 0

### 5-3S-c5

B3LYP/6-31G\* geometry  
O O 1.856347 -0.291778 -1.551218  
C O 3.504225 0.062646 0.153879  
C O 2.457197 2.036284 -0.876884  
C O 3.270022 1.525896 0.349418  
C O 1.321690 1.060552 -1.282963  
C O 2.827770 -0.678460 -0.741997  
C O 3.340372 -2.109336 -0.769895  
O O 4.383592 -2.072189 0.247203  
C O 4.484823 -0.804670 0.792751  
C O 2.306086 -3.155384 -0.389080  
O O 5.289840 -0.557564 1.668136  
O O 2.557968 1.822710 1.555159  
O O 3.331729 2.015763 -2.014747  
C O 1.920038 3.451861 -0.652976  
C O 0.142324 0.932842 -0.317217  
C O -0.975487 0.019878 -0.841505  
C O -2.181260 -0.039884 0.104687  
C O -3.302640 -0.958019 -0.398583  
C O -4.507222 -1.012587 0.546567  
O O 3.883397 -2.475243 -2.003120  
H O 4.230724 2.063428 0.352766  
H O 0.969803 1.377324 -2.268053  
H O 1.494689 -3.156322 -1.121763  
H O 1.896605 -2.942406 0.601207  
H O 2.780287 -4.140575 -0.379367  
H O 3.070173 1.443851 2.288614  
H O 4.027096 2.677995 -1.865810  
H O 2.762791 4.140575 -0.519253  
H O 1.294336 3.519475 0.238261  
H O 1.346181 3.781212 -1.525287  
H O 0.502158 0.582455 0.656422  
H O -0.264811 1.937366 -0.152717  
H O -1.303985 0.377692 -1.828360

H 0 -0.582620 -0.992868 -0.995333  
H 0 -1.849918 -0.383085 1.096005  
H 0 -2.581212 0.974501 0.251014  
H 0 -2.902705 -1.971969 -0.541235  
H 0 -3.630717 -0.617217 -1.390889  
H 0 -4.216664 -1.383820 1.537267  
H 0 -5.289840 -1.674855 0.158705  
H 0 -4.949068 -0.017615 0.682504  
H 0 4.507523 -1.785245 -2.288614  
Free Energy (PCM/B3LYP/6-31G\*) = -997.781261  
Number of imaginary frequencies = 0

### 5-3S-c6

B3LYP/6-31G\* geometry  
O 0 1.864969 -0.286126 -1.335835  
C 0 3.509705 0.067101 0.373410  
C 0 2.467703 2.041307 -0.654858  
C 0 3.277675 1.531521 0.567860  
C 0 1.327075 1.061721 -1.059486  
C 0 2.836702 -0.672843 -0.525784  
C 0 3.350702 -2.103039 -0.555404  
O 0 4.390376 -2.067392 0.465071  
C 0 4.489019 -0.800873 1.013801  
C 0 2.316151 -3.151105 -0.180955  
O 0 5.290946 -0.555544 1.892357  
O 0 2.558502 1.829263 1.768088  
O 0 3.442714 2.042833 -1.708660  
C 0 1.934792 3.458392 -0.430221  
C 0 0.147407 0.926459 -0.093318  
C 0 -0.971325 0.016177 -0.620368  
C 0 -2.177927 -0.044639 0.324763  
C 0 -3.300819 -0.958647 -0.182664  
C 0 -4.507287 -1.012192 0.760153  
O 0 3.898395 -2.465219 -1.787884  
H 0 4.234795 2.070885 0.562462  
H 0 0.958603 1.376144 -2.041452  
H 0 1.507265 -3.150927 -0.916413  
H 0 1.902981 -2.941040 0.808430  
H 0 2.791235 -4.135877 -0.172090  
H 0 3.071459 1.457480 2.504345  
H 0 3.019345 2.405728 -2.504345  
H 0 2.784456 4.135877 -0.299903  
H 0 1.302242 3.525060 0.456258  
H 0 1.357315 3.795985 -1.299322  
H 0 0.509900 0.571131 0.877498  
H 0 -0.259131 1.930225 0.077922  
H 0 -1.299266 0.377072 -1.606378  
H 0 -0.579448 -0.996578 -0.776926  
H 0 -1.848123 -0.391822 1.315182  
H 0 -2.575893 0.970087 0.474113  
H 0 -2.903341 -1.973306 -0.327071  
H 0 -3.626214 -0.614544 -1.174727  
H 0 -4.219551 -1.386406 1.750547  
H 0 -5.290946 -1.671489 0.369344  
H 0 -4.946724 -0.016345 0.897493  
H 0 4.525239 -1.775256 -2.067501  
Free Energy (PCM/B3LYP/6-31G\*) = -997.781227  
Number of imaginary frequencies = 0
